# Supplementary material for: The Lomagundi-Jatuli Event and Earth’s oxygenation
Source: Research Square preprint supplement (doi:10.21203/rs.3.rs-90288/v1), 2020-11-18
Supplement: Supplementary file 2 [file 9d72b22775ecada83993b348.xlsx]

## Sheet: 3.0–1.0 Ga, bootstrapped
Unit	location	Geon	d13Ccarb V-PDB	reference		Geon	bootstraped d13Ccarb V-PDB	95% conf interval upper	95% conf interval lower	jackknifed d13Ccarb V-PDB
Pongola Supergroup	N. Natal	29	1.2	Eglington et al. (2003)		29	1.39455	1.534	1.247	1.39455
Pongola Supergroup	N. Natal	29	1.6	Eglington et al. (2003)		28					no data?
Pongola Supergroup	N. Natal	29	2.1	Eglington et al. (2003)		27	-0.339675	-0.5658	-0.1058	-0.339675
Pongola Supergroup	N. Natal	29	2	Eglington et al. (2003)		26	-0.316569	-0.6197	-0.0103	-0.316569
Pongola Supergroup	N. Natal	29	1.5	Eglington et al. (2003)		25	-0.490924	-0.5762	-0.4088	-0.490924
Pongola Supergroup (Insuzi Gp)	Natal	29	-0.14	Schidlowski et al. (1983)		24	0.209345	-0.1842	0.6055	-0.000655191
Pongola Supergroup (Insuzi Gp)	Natal	29	1.8	Schidlowski et al. (1983)		23	4.01357	3.459	4.557	4.01357
Pongola Supergroup (Insuzi Gp)	Natal	29	2.1	Schidlowski et al. (1983)		22	4.74989	4.408	5.104	4.74989
Pongola Supergroup (Insuzi Gp)	Natal	29	1.1	Schidlowski et al. (1983)		21	4.75058	4.413	5.097	4.75058
Pongola Supergroup (Insuzi Gp)	Natal	29	2.1	Schidlowski et al. (1983)		20	1.99348	1.795	2.192	1.99348
Pongola Supergroup (Insuzi Gp)	Natal	29	1.4	Schidlowski et al. (1983)		19	0.0293501	-0.069	0.1263	0.0293501
Pongola Supergroup (Insuzi Gp)	Natal	29	1.8	Schidlowski et al. (1983)		18	0.530463	0.4386	0.6227	0.530463
Pongola Supergroup (Insuzi Gp)	Natal	29	2.9	Schidlowski et al. (1983)		17	1.40262	0.662	2.158	1.40262
Tholeni Dolomite	Natal	29	0.23	Veizer et al. (1990)		16	-0.719332	-0.7817	-0.6578	-0.719332
Tholeni Dolomite	Natal	29	0.15	Veizer et al. (1990)		15	-0.268716	-0.3195	-0.2182	-0.268716
Tholeni Dolomite	Natal	29	2.6	Veizer et al. (1990)		14	-0.413175	-0.5414	-0.2858	-0.413175
Tholeni Dolomite	Natal	29	-0.45	Veizer et al. (1990)		13	-0.255814	-0.4787	-0.0302	-0.255814
Tholeni Dolomite	Natal	29	2.5	Veizer et al. (1990)		12	2.15352	2.016	2.293	2.15352
Ubatha Dolomite	Natal	29	0.01	Veizer et al. (1990)		11	0.271307	0.1092	0.4339	0.271307
Ubatha Dolomite	Natal	29	3.02	Veizer et al. (1990)		10	1.38918	1.181	1.598	1.38918
Ubatha Dolomite	Natal	29	2	Veizer et al. (1990)
Ubatha Dolomite	Natal	29	0.29	Veizer et al. (1990)
Ubatha Dolomite	Natal	29	2.11	Veizer et al. (1990)
Ubatha Dolomite	Natal	29	2.6	Veizer et al. (1990)
Ubatha Dolomite	Natal	29	-0.12	Veizer et al. (1990)
Ubatha Dolomite	Natal	29	0.1	Veizer et al. (1990)
Ubatha Dolomite	Natal	29	0.5	Veizer et al. (1990)
Ubatha Dolomite	Natal	29	2.71	Veizer et al. (1990)
Ubatha Dolomite	Natal	29	1.5	Veizer et al. (1990)
Ubatha Dolomite	Natal	29	2.84	Veizer et al. (1990)
Ubatha Dolomite	Natal	29	-0.21	Veizer et al. (1990)
Mandeva Dolomite	Natal	29	1.6	Veizer et al. (1990)
Mandeva Dolomite	Natal	29	1.5	Veizer et al. (1990)
Mandeva Dolomite	Natal	29	1.7	Veizer et al. (1990)
Pongola SuperGp (Nsuza Gp)	South Africa	29	1.5	Siahi et al. (2018)
Pongola SuperGp (Nsuza Gp)	South Africa	29	1.7	Siahi et al. (2018)
Pongola SuperGp (Nsuza Gp)	South Africa	29	1.9	Siahi et al. (2018)
Pongola SuperGp (Nsuza Gp)	South Africa	29	2.1	Siahi et al. (2018)
Pongola SuperGp (Nsuza Gp)	South Africa	29	2.3	Siahi et al. (2018)
Pongola SuperGp (Nsuza Gp)	South Africa	29	2.2	Siahi et al. (2018)
Pongola SuperGp (Nsuza Gp)	South Africa	29	2.5	Siahi et al. (2018)
Pongola SuperGp (Nsuza Gp)	South Africa	29	2.3	Siahi et al. (2018)
Pongola SuperGp (Nsuza Gp)	South Africa	29	2.1	Siahi et al. (2018)
Pongola SuperGp (Nsuza Gp)	South Africa	29	0.2	Siahi et al. (2018)
Pongola SuperGp (Nsuza Gp)	South Africa	29	2.4	Siahi et al. (2018)
Pongola SuperGp (Nsuza Gp)	South Africa	29	0.1	Siahi et al. (2018)
Pongola SuperGp (Nsuza Gp)	South Africa	29	2.4	Siahi et al. (2018)
Pongola SuperGp (Nsuza Gp)	South Africa	29	2.3	Siahi et al. (2018)
Pongola SuperGp (Nsuza Gp)	South Africa	29	2.2	Siahi et al. (2018)
Pongola SuperGp (Nsuza Gp)	South Africa	29	2.4	Siahi et al. (2018)
Pongola SuperGp (Nsuza Gp)	South Africa	29	2.3	Siahi et al. (2018)
Pongola SuperGp (Nsuza Gp)	South Africa	29	2.2	Siahi et al. (2018)
Pongola SuperGp (Nsuza Gp)	South Africa	29	2.5	Siahi et al. (2018)
Pongola SuperGp (Nsuza Gp)	South Africa	29	2.1	Siahi et al. (2018)
Pongola SuperGp (Nsuza Gp)	South Africa	29	2.4	Siahi et al. (2018)
Pongola SuperGp (Nsuza Gp)	South Africa	29	2.3	Siahi et al. (2018)
Pongola SuperGp (Nsuza Gp)	South Africa	29	1.5	Siahi et al. (2018)
Pongola SuperGp (Nsuza Gp)	South Africa	29	2.4	Siahi et al. (2018)
Pongola SuperGp (Nsuza Gp)	South Africa	29	2.4	Siahi et al. (2018)
Pongola SuperGp (Nsuza Gp)	South Africa	29	2.4	Siahi et al. (2018)
Pongola SuperGp (Nsuza Gp)	South Africa	29	2.5	Siahi et al. (2018)
Pongola SuperGp (Nsuza Gp)	South Africa	29	2.5	Siahi et al. (2018)
Pongola SuperGp (Nsuza Gp)	South Africa	29	2.4	Siahi et al. (2018)
Pongola SuperGp (Nsuza Gp)	South Africa	29	2.5	Siahi et al. (2018)
Pongola SuperGp (Nsuza Gp)	South Africa	29	2.5	Siahi et al. (2018)
Pongola SuperGp (Nsuza Gp)	South Africa	29	2.5	Siahi et al. (2018)
Pongola SuperGp (Nsuza Gp)	South Africa	29	2.5	Siahi et al. (2018)
Pongola SuperGp (Nsuza Gp)	South Africa	29	2.5	Siahi et al. (2018)
Pongola SuperGp (Nsuza Gp)	South Africa	29	2.4	Siahi et al. (2018)
Pongola SuperGp (Nsuza Gp)	South Africa	29	2.3	Siahi et al. (2018)
Pongola SuperGp (Nsuza Gp)	South Africa	29	2.4	Siahi et al. (2018)
Pongola SuperGp (Nsuza Gp)	South Africa	29	2.2	Siahi et al. (2018)
Pongola SuperGp (Nsuza Gp)	South Africa	29	2.1	Siahi et al. (2018)
Pongola SuperGp (Nsuza Gp)	South Africa	29	1.9	Siahi et al. (2018)
Pongola SuperGp (Nsuza Gp)	South Africa	29	1.8	Siahi et al. (2018)
Pongola SuperGp (Nsuza Gp)	South Africa	29	2	Siahi et al. (2018)
Pongola SuperGp (Nsuza Gp)	South Africa	29	0	Siahi et al. (2018)
Pongola SuperGp (Nsuza Gp)	South Africa	29	0.4	Siahi et al. (2018)
Pongola SuperGp (Nsuza Gp)	South Africa	29	0.1	Siahi et al. (2018)
Pongola SuperGp (Nsuza Gp)	South Africa	29	1.7	Siahi et al. (2018)
Pongola SuperGp (Nsuza Gp)	South Africa	29	2.1	Siahi et al. (2018)
Pongola SuperGp (Nsuza Gp)	South Africa	29	1.8	Siahi et al. (2018)
Pongola SuperGp (Nsuza Gp)	South Africa	29	1.7	Siahi et al. (2018)
Pongola SuperGp (Nsuza Gp)	South Africa	29	1.5	Siahi et al. (2018)
Pongola SuperGp (Nsuza Gp)	South Africa	29	1.8	Siahi et al. (2018)
Pongola SuperGp (Nsuza Gp)	South Africa	29	1.7	Siahi et al. (2018)
Pongola SuperGp (Nsuza Gp)	South Africa	29	1.7	Siahi et al. (2018)
Pongola SuperGp (Nsuza Gp)	South Africa	29	1.8	Siahi et al. (2018)
Pongola SuperGp (Nsuza Gp)	South Africa	29	1.8	Siahi et al. (2018)
Pongola SuperGp (Nsuza Gp)	South Africa	29	1.9	Siahi et al. (2018)
Pongola SuperGp (Nsuza Gp)	South Africa	29	2.1	Siahi et al. (2018)
Pongola SuperGp (Nsuza Gp)	South Africa	29	2.1	Siahi et al. (2018)
Pongola SuperGp (Nsuza Gp)	South Africa	29	2.1	Siahi et al. (2018)
Pongola SuperGp (Nsuza Gp)	South Africa	29	2.2	Siahi et al. (2018)
Pongola SuperGp (Nsuza Gp)	South Africa	29	2.2	Siahi et al. (2018)
Pongola SuperGp (Nsuza Gp)	South Africa	29	1.1	Siahi et al. (2018)
Pongola SuperGp (Nsuza Gp)	South Africa	29	-2.4	Siahi et al. (2018)
Pongola SuperGp (Nsuza Gp)	South Africa	29	0.6	Siahi et al. (2018)
Pongola SuperGp (Nsuza Gp)	South Africa	29	2	Siahi et al. (2018)
Pongola SuperGp (Nsuza Gp)	South Africa	29	1.5	Siahi et al. (2018)
Pongola SuperGp (Nsuza Gp)	South Africa	29	1.2	Siahi et al. (2018)
Pongola SuperGp (Nsuza Gp)	South Africa	29	1.2	Siahi et al. (2018)
Pongola SuperGp (Nsuza Gp)	South Africa	29	1.2	Siahi et al. (2018)
Pongola SuperGp (Nsuza Gp)	South Africa	29	1.1	Siahi et al. (2018)
Pongola SuperGp (Nsuza Gp)	South Africa	29	1.2	Siahi et al. (2018)
Pongola SuperGp (Nsuza Gp)	South Africa	29	1.3	Siahi et al. (2018)
Pongola SuperGp (Nsuza Gp)	South Africa	29	1.2	Siahi et al. (2018)
Pongola SuperGp (Nsuza Gp)	South Africa	29	2.3	Siahi et al. (2018)
Pongola SuperGp (Nsuza Gp)	South Africa	29	1.7	Siahi et al. (2018)
Pongola SuperGp (Nsuza Gp)	South Africa	29	1.6	Siahi et al. (2018)
Pongola SuperGp (Nsuza Gp)	South Africa	29	1.7	Siahi et al. (2018)
Pongola SuperGp (Nsuza Gp)	South Africa	29	1.8	Siahi et al. (2018)
Pongola SuperGp (Nsuza Gp)	South Africa	29	2	Siahi et al. (2018)
Pongola SuperGp (Nsuza Gp)	South Africa	29	2.2	Siahi et al. (2018)
Pongola SuperGp (Nsuza Gp)	South Africa	29	2.2	Siahi et al. (2018)
Pongola SuperGp (Nsuza Gp)	South Africa	29	1.4	Siahi et al. (2018)
Pongola SuperGp (Nsuza Gp)	South Africa	29	1.4	Siahi et al. (2018)
Pongola SuperGp (Nsuza Gp)	South Africa	29	1.6	Siahi et al. (2018)
Pongola SuperGp (Nsuza Gp)	South Africa	29	1.8	Siahi et al. (2018)
Pongola SuperGp (Nsuza Gp)	South Africa	29	-0.41	Siahi et al. (2018)
Pongola SuperGp (Nsuza Gp)	South Africa	29	1.4	Siahi et al. (2018)
Pongola SuperGp (Nsuza Gp)	South Africa	29	1.5	Siahi et al. (2018)
Pongola SuperGp (Nsuza Gp)	South Africa	29	1.4	Siahi et al. (2018)
Pongola SuperGp (Nsuza Gp)	South Africa	29	2	Siahi et al. (2018)
Pongola SuperGp (Nsuza Gp)	South Africa	29	1.5	Siahi et al. (2018)
Pongola SuperGp (Nsuza Gp)	South Africa	29	1.9	Siahi et al. (2018)
Pongola SuperGp (Nsuza Gp)	South Africa	29	1.4	Siahi et al. (2018)
Pongola SuperGp (Nsuza Gp)	South Africa	29	1.6	Siahi et al. (2018)
Pongola SuperGp (Nsuza Gp)	South Africa	29	1.4	Siahi et al. (2018)
Pongola SuperGp (Nsuza Gp)	South Africa	29	1.2	Siahi et al. (2018)
Pongola SuperGp (Nsuza Gp)	South Africa	29	1.4	Siahi et al. (2018)
Pongola SuperGp (Nsuza Gp)	South Africa	29	1.5	Siahi et al. (2018)
Pongola SuperGp (Nsuza Gp)	South Africa	29	1.1	Siahi et al. (2018)
Pongola SuperGp (Nsuza Gp)	South Africa	29	1.4	Siahi et al. (2018)
Pongola SuperGp (Nsuza Gp)	South Africa	29	0.2	Siahi et al. (2018)
Pongola SuperGp (Nsuza Gp)	South Africa	29	0.4	Siahi et al. (2018)
Pongola SuperGp (Nsuza Gp)	South Africa	29	0.3	Siahi et al. (2018)
Pongola SuperGp (Nsuza Gp)	South Africa	29	0.1	Siahi et al. (2018)
Red Lake-Wallace Lake units	Ontario, Canada	29	1.59	Mcintyre & Frallick (2017)
Red Lake-Wallace Lake units	Ontario, Canada	29	0.38	Mcintyre & Frallick (2017)
Red Lake-Wallace Lake units	Ontario, Canada	29	0.26	Mcintyre & Frallick (2017)
Red Lake-Wallace Lake units	Ontario, Canada	29	0.14	Mcintyre & Frallick (2017)
Red Lake-Wallace Lake units	Ontario, Canada	29	0.62	Mcintyre & Frallick (2017)
Red Lake-Wallace Lake units	Ontario, Canada	29	0.7	Mcintyre & Frallick (2017)
Red Lake-Wallace Lake units	Ontario, Canada	29	0.78	Mcintyre & Frallick (2017)
Red Lake-Wallace Lake units	Ontario, Canada	29	0.76	Mcintyre & Frallick (2017)
Red Lake-Wallace Lake units	Ontario, Canada	29	0.93	Mcintyre & Frallick (2017)
Red Lake-Wallace Lake units	Ontario, Canada	29	0.36	Mcintyre & Frallick (2017)
Red Lake-Wallace Lake units	Ontario, Canada	29	0.63	Mcintyre & Frallick (2017)
Red Lake-Wallace Lake units	Ontario, Canada	29	-0.33	Mcintyre & Frallick (2017)
Red Lake-Wallace Lake units	Ontario, Canada	29	0.64	Mcintyre & Frallick (2017)
Red Lake-Wallace Lake units	Ontario, Canada	29	0.46	Mcintyre & Frallick (2017)
Red Lake-Wallace Lake units	Ontario, Canada	29	-1	Mcintyre & Frallick (2017)
Red Lake-Wallace Lake units	Ontario, Canada	29	0.19	Mcintyre & Frallick (2017)
Red Lake-Wallace Lake units	Ontario, Canada	29	-0.24	Mcintyre & Frallick (2017)
Red Lake-Wallace Lake units	Ontario, Canada	29	0.41	Mcintyre & Frallick (2017)
Uchi Greenstone Belt	Woman Lake, Ontario	29	-3.6	Veizer et al. (1989)
Uchi Greenstone Belt	Woman Lake, Ontario	29	0.89	Veizer et al. (1989)
Uchi Greenstone Belt	Woman Lake, Ontario	29	0.2	Veizer et al. (1989)
Uchi Greenstone Belt	Woman Lake, Ontario	29	0.61	Veizer et al. (1989)
Uchi Greenstone Belt	Woman Lake, Ontario	29	0.3	Veizer et al. (1989)
Uchi Greenstone Belt	Woman Lake, Ontario	29	0.9	Veizer et al. (1989)
Uchi Greenstone Belt	Woman Lake, Ontario	29	0.8	Veizer et al. (1989)
Uchi Greenstone Belt	Woman Lake, Ontario	29	1.14	Veizer et al. (1989)
Uchi Greenstone Belt	Woman Lake, Ontario	29	0.9	Veizer et al. (1989)
Uchi Greenstone Belt	Woman Lake, Ontario	29	0.87	Veizer et al. (1989)
Uchi Greenstone Belt	Woman Lake, Ontario	29	1.18	Veizer et al. (1989)
Uchi Greenstone Belt	Woman Lake, Ontario	29	0.97	Veizer et al. (1989)
Uchi Greenstone Belt	Woman Lake, Ontario	29	1.23	Veizer et al. (1989)
Uchi Greenstone Belt	Woman Lake, Ontario	29	1.07	Veizer et al. (1989)
Uchi Greenstone Belt	Woman Lake, Ontario	29	0.81	Veizer et al. (1989)
Uchi Greenstone Belt	Woman Lake, Ontario	29	0.4	Veizer et al. (1989)
Uchi Greenstone Belt	Woman Lake, Ontario	29	1.3	Veizer et al. (1989)
Uchi Greenstone Belt	Woman Lake, Ontario	29	1.3	Veizer et al. (1989)
Michipicoten Greenstone Belt	Algoma Mines, Ontario	27	2.39	Veizer et al. (1989)
Michipicoten Greenstone Belt	Algoma Mines, Ontario	27	1.99	Veizer et al. (1989)
Michipicoten Greenstone Belt	Algoma Mines, Ontario	27	2.42	Veizer et al. (1989)
Michipicoten Greenstone Belt	Algoma Mines, Ontario	27	2.28	Veizer et al. (1989)
Michipicoten Greenstone Belt	Algoma Mines, Ontario	27	2.46	Veizer et al. (1989)
Michipicoten Greenstone Belt	Algoma Mines, Ontario	27	2.42	Veizer et al. (1989)
Michipicoten Greenstone Belt	Algoma Mines, Ontario	27	2.43	Veizer et al. (1989)
Michipicoten Greenstone Belt	Algoma Mines, Ontario	27	2.3	Veizer et al. (1989)
Michipicoten Greenstone Belt	Algoma Mines, Ontario	27	2.58	Veizer et al. (1989)
Michipicoten Greenstone Belt	Algoma Mines, Ontario	27	2.5	Veizer et al. (1989)
Michipicoten Greenstone Belt	Algoma Mines, Ontario	27	2.45	Veizer et al. (1989)
Michipicoten Greenstone Belt	Algoma Mines, Ontario	27	2.34	Veizer et al. (1989)
Michipicoten Greenstone Belt	Algoma Mines, Ontario	27	3.69	Veizer et al. (1989)
Michipicoten Greenstone Belt	Algoma Mines, Ontario	27	2.76	Veizer et al. (1989)
Michipicoten Greenstone Belt	Algoma Mines, Ontario	27	2.99	Veizer et al. (1989)
Michipicoten Greenstone Belt	Algoma Mines, Ontario	27	2.35	Veizer et al. (1989)
Michipicoten Greenstone Belt	Algoma Mines, Ontario	27	2.64	Veizer et al. (1989)
Michipicoten Greenstone Belt	Algoma Mines, Ontario	27	2.56	Veizer et al. (1989)
Michipicoten Greenstone Belt	Algoma Mines, Ontario	27	2.78	Veizer et al. (1989)
Michipicoten Greenstone Belt	Algoma Mines, Ontario	27	2.56	Veizer et al. (1989)
Michipicoten Greenstone Belt	Algoma Mines, Ontario	27	2.57	Veizer et al. (1989)
Steep Rock Lake Group	Wabigoon Belt, Ontario	27	1.42	Veizer et al. (1989)
Steep Rock Lake Group	Wabigoon Belt, Ontario	27	1.92	Veizer et al. (1989)
Steep Rock Lake Group	Wabigoon Belt, Ontario	27	2.22	Veizer et al. (1989)
Steep Rock Lake Group	Wabigoon Belt, Ontario	27	2	Veizer et al. (1989)
Steep Rock Lake Group	Wabigoon Belt, Ontario	27	1.6	Veizer et al. (1989)
Steep Rock Lake Group	Wabigoon Belt, Ontario	27	2.21	Veizer et al. (1989)
Steep Rock Lake Group	Wabigoon Belt, Ontario	27	2.3	Veizer et al. (1989)
Steep Rock Lake Group	Wabigoon Belt, Ontario	27	2.08	Veizer et al. (1989)
Steep Rock Lake Group	Wabigoon Belt, Ontario	27	1.94	Veizer et al. (1989)
Steep Rock Lake Group	Wabigoon Belt, Ontario	27	2.55	Veizer et al. (1989)
Steep Rock Lake Group	Wabigoon Belt, Ontario	27	2.02	Veizer et al. (1989)
Steep Rock Lake Group	Wabigoon Belt, Ontario	27	1.98	Veizer et al. (1989)
Steep Rock Lake Group	Wabigoon Belt, Ontario	27	1.88	Veizer et al. (1989)
Steep Rock Lake Group	Wabigoon Belt, Ontario	27	2.16	Veizer et al. (1989)
Steep Rock Lake Group	Wabigoon Belt, Ontario	27	2	Veizer et al. (1989)
Steep Rock Lake Group	Wabigoon Belt, Ontario	27	2	Veizer et al. (1989)
Steep Rock Lake Group	Wabigoon Belt, Ontario	27	2.12	Veizer et al. (1989)
Steep Rock Lake Group	Wabigoon Belt, Ontario	27	2.4	Veizer et al. (1989)
Steep Rock Lake Group	Wabigoon Belt, Ontario	27	2.34	Veizer et al. (1989)
Steep Rock Lake Group	Wabigoon Belt, Ontario	27	1.96	Veizer et al. (1989)
Steep Rock Lake Group	Wabigoon Belt, Ontario	27	2.2	Veizer et al. (1989)
Steep Rock Lake Group	Wabigoon Belt, Ontario	27	2.23	Veizer et al. (1989)
Steep Rock Lake Group	Wabigoon Belt, Ontario	27	1.66	Veizer et al. (1989)
Steep Rock Lake Group	Wabigoon Belt, Ontario	27	2.58	Veizer et al. (1989)
Steep Rock Lake Group	Wabigoon Belt, Ontario	27	2.5	Veizer et al. (1989)
Steep Rock Lake Group	Wabigoon Belt, Ontario	27	2.49	Veizer et al. (1989)
Steep Rock Lake Group	Wabigoon Belt, Ontario	27	1.77	Veizer et al. (1989)
Steep Rock Lake Group	Wabigoon Belt, Ontario	27	2.38	Veizer et al. (1989)
Steep Rock Lake Group	Wabigoon Belt, Ontario	27	1.9	Veizer et al. (1989)
Steep Rock Lake Group	Wabigoon Belt, Ontario	27	1.53	Veizer et al. (1989)
Steep Rock Lake Group	Wabigoon Belt, Ontario	27	2.01	Veizer et al. (1989)
Steep Rock Lake Group	Wabigoon Belt, Ontario	27	2.37	Veizer et al. (1989)
Steep Rock Lake Group	Wabigoon Belt, Ontario	27	2.4	Veizer et al. (1989)
Steep Rock Lake Group	Wabigoon Belt, Ontario	27	0.97	Veizer et al. (1989)
Steep Rock Lake Group	Wabigoon Belt, Ontario	27	0.75	Veizer et al. (1989)
Steep Rock Lake Group	Wabigoon Belt, Ontario	27	0.8	Veizer et al. (1989)
Steep Rock Lake Group	Wabigoon Belt, Ontario	27	1.97	Veizer et al. (1989)
Steep Rock Lake Group	Wabigoon Belt, Ontario	27	0.89	Veizer et al. (1989)
Steep Rock Lake Group	Wabigoon Belt, Ontario	27	1.32	Veizer et al. (1989)
Steep Rock Lake Group	Wabigoon Belt, Ontario	27	1.8	Veizer et al. (1989)
Steep Rock Lake Group	Wabigoon Belt, Ontario	27	2	Veizer et al. (1989)
Steep Rock Lake Group	Wabigoon Belt, Ontario	27	1.91	Veizer et al. (1989)
Steep Rock Lake Group	Wabigoon Belt, Ontario	27	-3.1	Veizer et al. (1989)
Steep Rock Lake Group	Wabigoon Belt, Ontario	27	2.1	Veizer et al. (1989)
Steep Rock Lake Group	Wabigoon Belt, Ontario	27	1.6	Veizer et al. (1989)
Steep Rock Lake Group	Wabigoon Belt, Ontario	27	2.8	Veizer et al. (1989)
Steep Rock Lake Group	Wabigoon Belt, Ontario	27	2.35	Veizer et al. (1989)
Steep Rock Lake Group	Wabigoon Belt, Ontario	27	-2.65	Veizer et al. (1989)
Steep Rock Lake Group	Wabigoon Belt, Ontario	27	-3.6	Veizer et al. (1989)
Steep Rock Lake Group	Wabigoon Belt, Ontario	27	2.1	Schidlowski et al. (1983)
Steep Rock Lake Group	Wabigoon Belt, Ontario	27	1.1	Schidlowski et al. (1983)
Steep Rock Lake Group	Wabigoon Belt, Ontario	27	1.4	Schidlowski et al. (1983)
Abitibi Greenstone Belt	Larder Lake, Ontario	27	-0.84	Veizer et al. (1989)
Abitibi Greenstone Belt	Larder Lake, Ontario	27	-1.1	Veizer et al. (1989)
Abitibi Greenstone Belt	Larder Lake, Ontario	27	-0.77	Veizer et al. (1989)
Abitibi Greenstone Belt	Larder Lake, Ontario	27	-0.69	Veizer et al. (1989)
Abitibi Greenstone Belt	Larder Lake, Ontario	27	-0.97	Veizer et al. (1989)
Abitibi Greenstone Belt	Larder Lake, Ontario	27	-0.58	Veizer et al. (1989)
Abitibi Greenstone Belt	Larder Lake, Ontario	27	-0.55	Veizer et al. (1989)
Abitibi Greenstone Belt	Larder Lake, Ontario	27	-0.18	Veizer et al. (1989)
Abitibi Greenstone Belt	Larder Lake, Ontario	27	-0.27	Veizer et al. (1989)
Abitibi Greenstone Belt	Larder Lake, Ontario	27	-1.39	Veizer et al. (1989)
Abitibi Greenstone Belt	Larder Lake, Ontario	27	-1.7	Veizer et al. (1989)
Abitibi Greenstone Belt	Larder Lake, Ontario	27	-1.39	Veizer et al. (1989)
Abitibi Greenstone Belt	Larder Lake, Ontario	27	-1.32	Veizer et al. (1989)
Abitibi Greenstone Belt	Larder Lake, Ontario	27	-1.82	Veizer et al. (1989)
Abitibi Greenstone Belt	Larder Lake, Ontario	27	-1.62	Veizer et al. (1989)
Abitibi Greenstone Belt	Larder Lake, Ontario	27	-1.23	Veizer et al. (1989)
Abitibi Greenstone Belt	Larder Lake, Ontario	27	-2.15	Veizer et al. (1989)
Abitibi Greenstone Belt	Larder Lake, Ontario	27	-0.1	Veizer et al. (1989)
Abitibi Greenstone Belt	Larder Lake, Ontario	27	-0.3	Veizer et al. (1989)
Abitibi Greenstone Belt	Larder Lake, Ontario	27	-0.2	Veizer et al. (1989)
Abitibi Greenstone Belt	Larder Lake, Ontario	27	-2.37	Veizer et al. (1989)
Abitibi Greenstone Belt	Larder Lake, Ontario	27	-1.92	Veizer et al. (1989)
Abitibi Greenstone Belt	Larder Lake, Ontario	27	-4.56	Veizer et al. (1989)
Abitibi Greenstone Belt	Larder Lake, Ontario	27	-4.41	Veizer et al. (1989)
Abitibi Greenstone Belt	Larder Lake, Ontario	27	-4.85	Veizer et al. (1989)
Abitibi Greenstone Belt	Larder Lake, Ontario	27	-5.76	Veizer et al. (1989)
Abitibi Greenstone Belt	Larder Lake, Ontario	27	-4.05	Veizer et al. (1989)
Abitibi Greenstone Belt	Larder Lake, Ontario	27	-4.28	Veizer et al. (1989)
Abitibi Greenstone Belt	Larder Lake, Ontario	27	-6.01	Veizer et al. (1989)
Abitibi Greenstone Belt	Larder Lake, Ontario	27	-3.97	Veizer et al. (1989)
Abitibi Greenstone Belt	Larder Lake, Ontario	27	-2.1	Veizer et al. (1989)
Abitibi Greenstone Belt	Larder Lake, Ontario	27	-5.8	Veizer et al. (1989)
Abitibi Greenstone Belt	Larder Lake, Ontario	27	-5	Veizer et al. (1989)
Abitibi Greenstone Belt	Larder Lake, Ontario	27	-5.68	Veizer et al. (1989)
Abitibi Greenstone Belt	Larder Lake, Ontario	27	-2.7	Veizer et al. (1989)
Abitibi Greenstone Belt	Larder Lake, Ontario	27	-6.21	Veizer et al. (1989)
Abitibi Greenstone Belt	Larder Lake, Ontario	27	-4.55	Veizer et al. (1989)
Abitibi Greenstone Belt	Larder Lake, Ontario	27	-2.69	Veizer et al. (1989)
Abitibi Greenstone Belt	Larder Lake, Ontario	27	-4.63	Veizer et al. (1989)
Abitibi Greenstone Belt	Larder Lake, Ontario	27	-2.56	Veizer et al. (1989)
Abitibi Greenstone Belt	Larder Lake, Ontario	27	-3.19	Veizer et al. (1989)
Abitibi Greenstone Belt	Larder Lake, Ontario	27	-4.53	Veizer et al. (1989)
Abitibi Greenstone Belt	Larder Lake, Ontario	27	-3.6	Veizer et al. (1989)
Abitibi Greenstone Belt	Larder Lake, Ontario	27	-4.9	Veizer et al. (1989)
Abitibi Greenstone Belt	Larder Lake, Ontario	27	-3.2	Veizer et al. (1989)
Abitibi Greenstone Belt	Larder Lake, Ontario	27	-3	Veizer et al. (1989)
Abitibi Greenstone Belt	Larder Lake, Ontario	27	-3.15	Veizer et al. (1989)
Abitibi Greenstone Belt	Larder Lake, Ontario	27	-3.78	Veizer et al. (1989)
Abitibi Greenstone Belt	Larder Lake, Ontario	27	-2.17	Veizer et al. (1989)
Abitibi Greenstone Belt	Larder Lake, Ontario	27	-2.01	Veizer et al. (1989)
Abitibi Greenstone Belt	Larder Lake, Ontario	27	-2.15	Veizer et al. (1989)
Ventersdorp Supergroup	Witwatersrand Basin	27	-6.2	Schidlowski et al. (1983)
Ventersdorp Supergroup	Witwatersrand Basin	27	-5.4	Schidlowski et al. (1983)
Ventersdorp Supergroup	Witwatersrand Basin	27	-3.6	Schidlowski et al. (1983)
Ventersdorp Supergroup	Witwatersrand Basin	27	-3.5	Schidlowski et al. (1983)
Ventersdorp Supergroup	Witwatersrand Basin	27	-2.8	Schidlowski et al. (1983)
Ventersdorp Supergroup	Witwatersrand Basin	27	-2.2	Schidlowski et al. (1983)
Ventersdorp Supergroup	Witwatersrand Basin	27	-1.9	Schidlowski et al. (1983)
Ventersdorp Supergroup	Witwatersrand Basin	27	-1.9	Schidlowski et al. (1983)
Ventersdorp Supergroup	Witwatersrand Basin	27	-1.8	Schidlowski et al. (1983)
Ventersdorp Supergroup	Witwatersrand Basin	27	-2.3	Schidlowski et al. (1983)
Ngesi Group (Manjeri Fm)	Belingwe Belt, Zimbabwe	27	-7.2	Schidlowski et al. (1983)
Ngesi Group (Manjeri Fm)	Belingwe Belt, Zimbabwe	27	-7.1	Schidlowski et al. (1983)
Ngesi Group (Manjeri Fm)	Belingwe Belt, Zimbabwe	27	-5.7	Schidlowski et al. (1983)
Ngesi Group (Manjeri Fm)	Belingwe Belt, Zimbabwe	27	-0.2	Abell et al. (1985)
Ngesi Group (Manjeri Fm)	Belingwe Belt, Zimbabwe	27	-0.4	Abell et al. (1985)
Ngesi Group (Manjeri Fm)	Belingwe Belt, Zimbabwe	27	-0.14	Abell et al. (1985)
Ngesi Group (Manjeri Fm)	Belingwe Belt, Zimbabwe	27	0.08	Abell et al. (1985)
Ngesi Group (Manjeri Fm)	Belingwe Belt, Zimbabwe	27	0.34	Abell et al. (1985)
Ngesi Group (Manjeri Fm)	Belingwe Belt, Zimbabwe	27	-0.6	Abell et al. (1985)
Ngesi Group (Manjeri Fm)	Belingwe Belt, Zimbabwe	27	-0.2	Abell et al. (1985)
Ngesi Group (Manjeri Fm)	Belingwe Belt, Zimbabwe	27	-0.14	Abell et al. (1985)
Ngesi Group (Manjeri Fm)	Belingwe Belt, Zimbabwe	27	-0.23	Abell et al. (1985)
Ngesi Group (Manjeri Fm)	Belingwe Belt, Zimbabwe	27	0.42	Abell et al. (1985)
Ngesi Group (Manjeri Fm)	Belingwe Belt, Zimbabwe	27	0.33	Abell et al. (1985)
Ngesi Group (Manjeri Fm)	Belingwe Belt, Zimbabwe	27	-0.64	Abell et al. (1985)
Ngesi Group (Manjeri Fm)	Belingwe Belt, Zimbabwe	27	-0.18	Abell et al. (1985)
Ngesi Group (Manjeri Fm)	Belingwe Belt, Zimbabwe	27	-0.16	Abell et al. (1985)
Ngesi Group (Manjeri Fm)	Belingwe Belt, Zimbabwe	27	-0.18	Abell et al. (1985)
Ngesi Group (Manjeri Fm)	Belingwe Belt, Zimbabwe	27	-0.16	Abell et al. (1985)
Ngesi Group (Manjeri Fm)	Belingwe Belt, Zimbabwe	27	-0.38	Abell et al. (1985)
Ngesi Group (Manjeri Fm)	Belingwe Belt, Zimbabwe	27	-0.33	Abell et al. (1985)
Ngesi Group (Manjeri Fm)	Belingwe Belt, Zimbabwe	27	-0.41	Abell et al. (1985)
Ngesi Group (Manjeri Fm)	Belingwe Belt, Zimbabwe	27	-0.25	Abell et al. (1985)
Ngesi Group (Manjeri Fm)	Belingwe Belt, Zimbabwe	27	-0.28	Abell et al. (1985)
Ngesi Group (Manjeri Fm)	Belingwe Belt, Zimbabwe	27	-0.19	Abell et al. (1985)
Ngesi Group (Manjeri Fm)	Belingwe Belt, Zimbabwe	27	-0.41	Abell et al. (1985)
Ngesi Group (Manjeri Fm)	Belingwe Belt, Zimbabwe	27	-0.34	Abell et al. (1985)
Ngesi Group (Manjeri Fm)	Belingwe Belt, Zimbabwe	27	-0.44	Abell et al. (1985)
Ngesi Group (Manjeri Fm)	Belingwe Belt, Zimbabwe	27	-0.19	Abell et al. (1985)
Ngesi Group (Manjeri Fm)	Belingwe Belt, Zimbabwe	27	-0.06	Abell et al. (1985)
Ngesi Group (Manjeri Fm)	Belingwe Belt, Zimbabwe	27	-0.24	Abell et al. (1985)
Ngesi Group (Manjeri Fm)	Belingwe Belt, Zimbabwe	27	-0.2	Abell et al. (1985)
Ngesi Group (Manjeri Fm)	Belingwe Belt, Zimbabwe	27	-0.19	Abell et al. (1985)
Ngesi Group (Manjeri Fm)	Belingwe Belt, Zimbabwe	27	-0.2	Abell et al. (1985)
Ngesi Group (Manjeri Fm)	Belingwe Belt, Zimbabwe	27	-0.07	Abell et al. (1985)
Ngesi Group (Manjeri Fm)	Belingwe Belt, Zimbabwe	27	0	Abell et al. (1985)
Ngesi Group (Manjeri Fm)	Belingwe Belt, Zimbabwe	27	-0.27	Abell et al. (1985)
Ngesi Group (Manjeri Fm)	Belingwe Belt, Zimbabwe	27	0.43	Abell et al. (1985)
Ngesi Group (Manjeri Fm)	Belingwe Belt, Zimbabwe	27	-0.05	Abell et al. (1985)
Ngesi Group (Manjeri Fm)	Belingwe Belt, Zimbabwe	27	-0.11	Abell et al. (1985)
Ngesi Group (Manjeri Fm)	Belingwe Belt, Zimbabwe	27	-0.03	Abell et al. (1985)
Ngesi Group (Manjeri Fm)	Belingwe Belt, Zimbabwe	27	0.12	Abell et al. (1985)
Ngesi Group (Manjeri Fm)	Belingwe Belt, Zimbabwe	27	-0.07	Abell et al. (1985)
Ngesi Group (Manjeri Fm)	Belingwe Belt, Zimbabwe	27	-0.3	Abell et al. (1985)
Ngesi Group (Manjeri Fm)	Belingwe Belt, Zimbabwe	27	0.07	Abell et al. (1985)
Ngesi Group (Manjeri Fm)	Belingwe Belt, Zimbabwe	27	-0.57	Abell et al. (1985)
Ngesi Group (Manjeri Fm)	Belingwe Belt, Zimbabwe	27	-0.15	Abell et al. (1985)
Ngesi Group (Manjeri Fm)	Belingwe Belt, Zimbabwe	27	-1.16	Abell et al. (1985)
Ngesi Group (Manjeri Fm)	Belingwe Belt, Zimbabwe	27	-0.57	Abell et al. (1985)
Ngesi Group (Manjeri Fm)	Belingwe Belt, Zimbabwe	27	-0.27	Abell et al. (1985)
Ngesi Group (Manjeri Fm)	Belingwe Belt, Zimbabwe	27	-0.33	Abell et al. (1985)
Ngesi Group (Manjeri Fm)	Belingwe Belt, Zimbabwe	27	0.04	Abell et al. (1985)
Ngesi Group (Manjeri Fm)	Belingwe Belt, Zimbabwe	27	-0.03	Abell et al. (1985)
Ngesi Group (Manjeri Fm)	Belingwe Belt, Zimbabwe	27	-0.26	Abell et al. (1985)
Ngesi Group (Manjeri Fm)	Belingwe Belt, Zimbabwe	27	-0.17	Abell et al. (1985)
Ngesi Group (Manjeri Fm)	Belingwe Belt, Zimbabwe	27	-0.01	Abell et al. (1985)
Ngesi Group (Manjeri Fm)	Belingwe Belt, Zimbabwe	27	0.11	Abell et al. (1985)
Ngesi Group (Manjeri Fm)	Belingwe Belt, Zimbabwe	27	0.29	Abell et al. (1985)
Ngesi Group (Manjeri Fm)	Belingwe Belt, Zimbabwe	27	-0.12	Abell et al. (1985)
Ngesi Group (Manjeri Fm)	Belingwe Belt, Zimbabwe	27	0.01	Abell et al. (1985)
Ngesi Group (Manjeri Fm)	Belingwe Belt, Zimbabwe	27	0.07	Abell et al. (1985)
Ngesi Group (Manjeri Fm)	Belingwe Belt, Zimbabwe	27	0.1	Abell et al. (1985)
Ngesi Group (Manjeri Fm)	Belingwe Belt, Zimbabwe	27	0.22	Abell et al. (1985)
Ngesi Group (Manjeri Fm)	Belingwe Belt, Zimbabwe	27	-0.43	Abell et al. (1985)
Ngesi Group (Manjeri Fm)	Belingwe Belt, Zimbabwe	27	-0.1	Abell et al. (1985)
Ngesi Group (Manjeri Fm)	Belingwe Belt, Zimbabwe	27	0.22	Abell et al. (1985)
Ngesi Group (Manjeri Fm)	Belingwe Belt, Zimbabwe	27	0.33	Abell et al. (1985)
Ngesi Group (Manjeri Fm)	Belingwe Belt, Zimbabwe	27	-0.1	Abell et al. (1985)
Ngesi Group (Manjeri Fm)	Belingwe Belt, Zimbabwe	27	0.05	Abell et al. (1985)
Ngesi Group (Manjeri Fm)	Belingwe Belt, Zimbabwe	27	-0.62	Abell et al. (1985)
Ngesi Group (Manjeri Fm)	Belingwe Belt, Zimbabwe	27	-0.3	Abell et al. (1985)
Ngesi Group (Manjeri Fm)	Belingwe Belt, Zimbabwe	27	-0.15	Abell et al. (1985)
Ngesi Group (Manjeri Fm)	Belingwe Belt, Zimbabwe	27	0.11	Abell et al. (1985)
Ngesi Group (Manjeri Fm)	Belingwe Belt, Zimbabwe	27	-0.19	Abell et al. (1985)
Ngesi Group (Manjeri Fm)	Belingwe Belt, Zimbabwe	27	-0.13	Abell et al. (1985)
Ngesi Group (Manjeri Fm)	Belingwe Belt, Zimbabwe	27	-0.27	Abell et al. (1985)
Ngesi Group (Manjeri Fm)	Belingwe Belt, Zimbabwe	27	-0.22	Abell et al. (1985)
Ngesi Group (Manjeri Fm)	Belingwe Belt, Zimbabwe	27	-0.89	Abell et al. (1985)
Ngesi Group (Manjeri Fm)	Belingwe Belt, Zimbabwe	27	-0.76	Abell et al. (1985)
Ngesi Group (Manjeri Fm)	Belingwe Belt, Zimbabwe	27	0.01	Abell et al. (1985)
Ngesi Group (Manjeri Fm)	Belingwe Belt, Zimbabwe	27	-0.23	Abell et al. (1985)
Ngesi Group (Manjeri Fm)	Belingwe Belt, Zimbabwe	27	-0.2	Abell et al. (1985)
Ngesi Group (Manjeri Fm)	Belingwe Belt, Zimbabwe	27	-0.02	Abell et al. (1985)
Ngesi Group (Manjeri Fm)	Belingwe Belt, Zimbabwe	27	0.04	Abell et al. (1985)
Ngesi Group (Manjeri Fm)	Belingwe Belt, Zimbabwe	27	-0.1	Abell et al. (1985)
Ngesi Group (Manjeri Fm)	Belingwe Belt, Zimbabwe	27	-0.21	Abell et al. (1985)
Ngesi Group (Manjeri Fm)	Belingwe Belt, Zimbabwe	27	0.04	Abell et al. (1985)
Ngesi Group (Manjeri Fm)	Belingwe Belt, Zimbabwe	27	-0.15	Abell et al. (1985)
Ngesi Group (Manjeri Fm)	Belingwe Belt, Zimbabwe	27	-0.11	Abell et al. (1985)
Ngesi Group (Manjeri Fm)	Belingwe Belt, Zimbabwe	27	-0.16	Abell et al. (1985)
Ngesi Group (Manjeri Fm)	Belingwe Belt, Zimbabwe	27	-0.23	Abell et al. (1985)
Ngesi Group (Manjeri Fm)	Belingwe Belt, Zimbabwe	27	-0.16	Abell et al. (1985)
Ngesi Group (Manjeri Fm)	Belingwe Belt, Zimbabwe	27	-0.27	Abell et al. (1985)
Ngesi Group (Manjeri Fm)	Belingwe Belt, Zimbabwe	27	0.28	Abell et al. (1985)
Ngesi Group (Manjeri Fm)	Belingwe Belt, Zimbabwe	27	-0.27	Abell et al. (1985)
Ngesi Group (Manjeri Fm)	Belingwe Belt, Zimbabwe	27	0	Abell et al. (1985)
Ngesi Group (Manjeri Fm)	Belingwe Belt, Zimbabwe	27	-0.03	Abell et al. (1985)
Ngesi Group (Manjeri Fm)	Belingwe Belt, Zimbabwe	27	0.01	Abell et al. (1985)
Ngesi Group (Manjeri Fm)	Belingwe Belt, Zimbabwe	27	0.14	Abell et al. (1985)
Ngesi Group (Manjeri Fm)	Belingwe Belt, Zimbabwe	27	0.18	Abell et al. (1985)
Ngesi Group (Manjeri Fm)	Belingwe Belt, Zimbabwe	27	-0.28	Abell et al. (1985)
Ngesi Group (Manjeri Fm)	Belingwe Belt, Zimbabwe	27	-0.15	Abell et al. (1985)
Ngesi Group (Manjeri Fm)	Belingwe Belt, Zimbabwe	27	0.4	Abell et al. (1985)
Ngesi Group (Manjeri Fm)	Belingwe Belt, Zimbabwe	27	-0.39	Abell et al. (1985)
Ngesi Group (Manjeri Fm)	Belingwe Belt, Zimbabwe	27	0	Abell et al. (1985)
Ngesi Group (Manjeri Fm)	Belingwe Belt, Zimbabwe	27	-0.28	Abell et al. (1985)
Ngesi Group (Manjeri Fm)	Belingwe Belt, Zimbabwe	27	-0.59	Abell et al. (1985)
Ngesi Group (Manjeri Fm)	Belingwe Belt, Zimbabwe	27	0.35	Abell et al. (1985)
Ngesi Group (Manjeri Fm)	Belingwe Belt, Zimbabwe	27	0.03	Abell et al. (1985)
Ngesi Group (Manjeri Fm)	Belingwe Belt, Zimbabwe	27	-0.29	Abell et al. (1985)
Ngesi Group (Manjeri Fm)	Belingwe Belt, Zimbabwe	27	0.28	Abell et al. (1985)
Ngesi Group (Manjeri Fm)	Belingwe Belt, Zimbabwe	27	-0.3	Abell et al. (1985)
Ngesi Group (Manjeri Fm)	Belingwe Belt, Zimbabwe	27	-0.22	Abell et al. (1985)
Ngesi Group (Manjeri Fm)	Belingwe Belt, Zimbabwe	27	-0.04	Abell et al. (1985)
Ngesi Group (Manjeri Fm)	Belingwe Belt, Zimbabwe	27	-0.13	Abell et al. (1985)
Ngesi Group (Manjeri Fm)	Belingwe Belt, Zimbabwe	27	0.02	Abell et al. (1985)
Ngesi Group (Manjeri Fm)	Belingwe Belt, Zimbabwe	27	0.45	Abell et al. (1985)
Ngesi Group (Manjeri Fm)	Belingwe Belt, Zimbabwe	27	0.05	Abell et al. (1985)
Ngesi Group (Manjeri Fm)	Belingwe Belt, Zimbabwe	27	-0.08	Abell et al. (1985)
Ngesi Group (Manjeri Fm)	Belingwe Belt, Zimbabwe	27	-0.08	Abell et al. (1985)
Ngesi Group (Manjeri Fm)	Belingwe Belt, Zimbabwe	27	0.4	Abell et al. (1985)
Ngesi Group (Manjeri Fm)	Belingwe Belt, Zimbabwe	27	0.58	Abell et al. (1985)
Ngesi Group (Manjeri Fm)	Belingwe Belt, Zimbabwe	27	-0.22	Abell et al. (1985)
Ngesi Group (Manjeri Fm)	Belingwe Belt, Zimbabwe	27	-0.14	Abell et al. (1985)
Ngesi Group (Manjeri Fm)	Belingwe Belt, Zimbabwe	27	0.31	Abell et al. (1985)
Ngesi Group (Manjeri Fm)	Belingwe Belt, Zimbabwe	27	-0.18	Abell et al. (1985)
Ngesi Group (Manjeri Fm)	Belingwe Belt, Zimbabwe	27	0.07	Abell et al. (1985)
Ngesi Group (Manjeri Fm)	Belingwe Belt, Zimbabwe	27	-0.06	Abell et al. (1985)
Ngesi Group (Manjeri Fm)	Belingwe Belt, Zimbabwe	27	-0.09	Abell et al. (1985)
Ngesi Group (Manjeri Fm)	Belingwe Belt, Zimbabwe	27	0.11	Abell et al. (1985)
Ngesi Group (Manjeri Fm)	Belingwe Belt, Zimbabwe	27	0.08	Abell et al. (1985)
Ngesi Group (Manjeri Fm)	Belingwe Belt, Zimbabwe	27	-0.11	Abell et al. (1985)
Ngesi Group (Manjeri Fm)	Belingwe Belt, Zimbabwe	27	0.03	Abell et al. (1985)
Ngesi Group (Manjeri Fm)	Belingwe Belt, Zimbabwe	27	0.12	Abell et al. (1985)
Ngesi Group (Manjeri Fm)	Belingwe Belt, Zimbabwe	27	0.04	Abell et al. (1985)
Ngesi Group (Manjeri Fm)	Belingwe Belt, Zimbabwe	27	0.21	Abell et al. (1985)
Fortescue Group (Tumbiana Fm)	Hamersley Basin	27	0.5	Schidlowski et al. (1983)
Fortescue Group (Tumbiana Fm)	Hamersley Basin	27	-1.7	Schidlowski et al. (1983)
Fortescue Group (Tumbiana Fm)	Hamersley Basin	27	-1.3	Schidlowski et al. (1983)
Fortescue Group (Tumbiana Fm)	Hamersley Basin	27	-1	Schidlowski et al. (1983)
Fortescue Group (Tumbiana Fm)	Hamersley Basin	27	-0.5	Schidlowski et al. (1983)
Fortescue Group (Tumbiana Fm)	Hamersley Basin	27	-0.2	Schidlowski et al. (1983)
Fortescue Group (Tumbiana Fm)	Hamersley Basin	27	0.2	Schidlowski et al. (1983)
Fortescue Group (Tumbiana Fm)	Hamersley Basin	27	0.6	Schidlowski et al. (1983)
Fortescue Group (Tumbiana Fm)	Hamersley Basin	27	0.7	Schidlowski et al. (1983)
Fortescue Group (Tumbiana Fm)	Hamersley Basin	27	0.7	Schidlowski et al. (1983)
Fortescue Group (Tumbiana Fm)	Hamersley Basin	27	0.8	Schidlowski et al. (1983)
Fortescue Group (Tumbiana Fm)	Hamersley Basin	27	-4.01	Veizer et al. (1990)
Fortescue Group (Tumbiana Fm)	Hamersley Basin	27	-3.23	Veizer et al. (1990)
Fortescue Group (Tumbiana Fm)	Hamersley Basin	27	-2.48	Veizer et al. (1990)
Fortescue Group (Tumbiana Fm)	Hamersley Basin	27	-2.06	Veizer et al. (1990)
Fortescue Group (Tumbiana Fm)	Hamersley Basin	27	-9.43	Veizer et al. (1990)
Fortescue Group (Tumbiana Fm)	Hamersley Basin	27	-4.2	Thomazo et al. (2009)
Fortescue Group (Tumbiana Fm)	Hamersley Basin	27	-9.2	Thomazo et al. (2009)
Fortescue Group (Tumbiana Fm)	Hamersley Basin	27	-7.7	Thomazo et al. (2009)
Fortescue Group (Tumbiana Fm)	Hamersley Basin	27	-6.1	Thomazo et al. (2009)
Fortescue Group (Tumbiana Fm)	Hamersley Basin	27	1	Thomazo et al. (2009)
Fortescue Group (Tumbiana Fm)	Hamersley Basin	27	0	Thomazo et al. (2009)
Fortescue Group (Tumbiana Fm)	Hamersley Basin	27	0.4	Thomazo et al. (2009)
Fortescue Group (Tumbiana Fm)	Hamersley Basin	27	0.9	Thomazo et al. (2009)
Fortescue Group (Tumbiana Fm)	Hamersley Basin	27	0.8	Thomazo et al. (2009)
Fortescue Group (Tumbiana Fm)	Hamersley Basin	27	0.6	Thomazo et al. (2009)
Fortescue Group (Tumbiana Fm)	Hamersley Basin	27	0	Thomazo et al. (2009)
Fortescue Group (Tumbiana Fm)	Hamersley Basin	27	1.1	Thomazo et al. (2009)
Fortescue Group (Tumbiana Fm)	Hamersley Basin	27	0.8	Thomazo et al. (2009)
Fortescue Group (Tumbiana Fm)	Hamersley Basin	27	0.3	Thomazo et al. (2009)
Fortescue Group (Tumbiana Fm)	Hamersley Basin	27	0.8	Thomazo et al. (2009)
Fortescue Group (Tumbiana Fm)	Hamersley Basin	27	1.9	Thomazo et al. (2009)
Fortescue Group (Tumbiana Fm)	Hamersley Basin	27	1.3	Thomazo et al. (2009)
Fortescue Group (Tumbiana Fm)	Hamersley Basin	27	1.1	Thomazo et al. (2009)
Fortescue Group (Tumbiana Fm)	Hamersley Basin	27	1.2	Thomazo et al. (2009)
Fortescue Group (Tumbiana Fm)	Hamersley Basin	27	1.3	Thomazo et al. (2009)
Fortescue Group (Tumbiana Fm)	Hamersley Basin	27	0.9	Thomazo et al. (2009)
Fortescue Group (Tumbiana Fm)	Hamersley Basin	27	1.6	Thomazo et al. (2009)
Fortescue Group (Tumbiana Fm)	Hamersley Basin	27	1.4	Thomazo et al. (2009)
Fortescue Group (Tumbiana Fm)	Hamersley Basin	27	0.8	Thomazo et al. (2009)
Fortescue Group (Tumbiana Fm)	Hamersley Basin	27	1.1	Thomazo et al. (2009)
Fortescue Group (Tumbiana Fm)	Hamersley Basin	27	0.4	Thomazo et al. (2009)
Fortescue Group (Tumbiana Fm)	Hamersley Basin	27	-1.9	Thomazo et al. (2009)
Fortescue Group (Tumbiana Fm)	Hamersley Basin	27	-1.2	Thomazo et al. (2009)
Fortescue Group (Tumbiana Fm)	Hamersley Basin	27	-1.9	Thomazo et al. (2009)
Fortescue Group (Tumbiana Fm)	Hamersley Basin	27	-2.2	Thomazo et al. (2009)
Fortescue Group (Tumbiana Fm)	Hamersley Basin	27	-0.7	Thomazo et al. (2009)
Fortescue Group (Tumbiana Fm)	Hamersley Basin	27	-2	Thomazo et al. (2009)
Fortescue Group (Tumbiana Fm)	Hamersley Basin	27	-1.3	Thomazo et al. (2009)
Fortescue Group (Tumbiana Fm)	Hamersley Basin	27	-0.5	Thomazo et al. (2009)
Fortescue Group (Tumbiana Fm)	Hamersley Basin	27	-0.2	Thomazo et al. (2009)
Fortescue Group (Tumbiana Fm)	Hamersley Basin	27	-1.8	Thomazo et al. (2009)
Fortescue Group (Tumbiana Fm)	Hamersley Basin	27	-1.1	Thomazo et al. (2009)
Fortescue Group (Tumbiana Fm)	Hamersley Basin	27	-0.6	Thomazo et al. (2009)
Fortescue Group (Tumbiana Fm)	Hamersley Basin	27	-0.7	Thomazo et al. (2009)
Fortescue Group (Tumbiana Fm)	Hamersley Basin	27	-1	Thomazo et al. (2009)
Fortescue Group (Kylena Fm)	Hamersley Basin	27	1.2	Flannery et al. (2014)
Fortescue Group (Kylena Fm)	Hamersley Basin	27	-5.6	Flannery et al. (2014)
Fortescue Group (Kylena Fm)	Hamersley Basin	27	2.1	Flannery et al. (2014)
Fortescue Group (Kylena Fm)	Hamersley Basin	27	-2.8	Flannery et al. (2014)
Fortescue Group (Kylena Fm)	Hamersley Basin	27	-2.6	Flannery et al. (2014)
Fortescue Group (Kylena Fm)	Hamersley Basin	27	0.8	Flannery et al. (2014)
Fortescue Group (Kylena Fm)	Hamersley Basin	27	-1.6	Flannery et al. (2014)
Fortescue Group (Kylena Fm)	Hamersley Basin	27	0.7	Flannery et al. (2014)
Fortescue Group (Kylena Fm)	Hamersley Basin	27	1.5	Flannery et al. (2014)
Fortescue Group (Kylena Fm)	Hamersley Basin	27	1.8	Flannery et al. (2014)
Fortescue Group (Kylena Fm)	Hamersley Basin	27	-0.1	Flannery et al. (2014)
Fortescue Group (Kylena Fm)	Hamersley Basin	27	1.7	Flannery et al. (2014)
Fortescue Group (Kylena Fm)	Hamersley Basin	27	1.8	Flannery et al. (2014)
Bulawayan Gp (Up. Greenschist)	Zimbabwe	26	0.8	Veizer et al. (1989)
Bulawayan Gp (Up. Greenschist)	Zimbabwe	26	0.8	Veizer et al. (1989)
Bulawayan Gp (Up. Greenschist)	Zimbabwe	26	-0.2	Veizer et al. (1989)
Bulawayan Gp (Up. Greenschist)	Zimbabwe	26	-0.5	Veizer et al. (1989)
Bulawayan Gp (Up. Greenschist)	Zimbabwe	26	-0.8	Veizer et al. (1989)
Bulawayan Gp (Up. Greenschist)	Zimbabwe	26	-0.1	Veizer et al. (1989)
Bulawayan Gp (Up. Greenschist)	Zimbabwe	26	1.3	Veizer et al. (1989)
Bulawayan Gp (Up. Greenschist)	Zimbabwe	26	0.01	Veizer et al. (1989)
Bulawayan Gp (Up. Greenschist)	Zimbabwe	26	1.3	Veizer et al. (1989)
Bulawayan Gp (Up. Greenschist)	Zimbabwe	26	0.4	Veizer et al. (1989)
Bulawayan Gp (Up. Greenschist)	Zimbabwe	26	-0.1	Veizer et al. (1989)
Bulawayan Gp (Up. Greenschist)	Zimbabwe	26	-0.4	Veizer et al. (1989)
Bulawayan Gp (Up. Greenschist)	Zimbabwe	26	1.3	Veizer et al. (1989)
Bulawayan Gp (Up. Greenschist)	Zimbabwe	26	0.2	Veizer et al. (1989)
Bulawayan Gp (Up. Greenschist)	Zimbabwe	26	1.3	Veizer et al. (1989)
Bothaville Fm	Kaapvaal	26	-2.6	Veizer et al. (1990)
Bothaville Fm	Kaapvaal	26	-2.53	Veizer et al. (1990)
Bothaville Fm	Kaapvaal	26	-1.72	Veizer et al. (1990)
Bothaville Fm	Kaapvaal	26	-1.66	Veizer et al. (1990)
Bothaville Fm	Kaapvaal	26	-2.1	Veizer et al. (1990)
Bothaville Fm	Kaapvaal	26	-2.1	Veizer et al. (1990)
Bothaville Fm	Kaapvaal	26	-1.96	Veizer et al. (1990)
Bothaville Fm	Kaapvaal	26	-1.99	Veizer et al. (1990)
Bothaville Fm	Kaapvaal	26	-1.83	Veizer et al. (1990)
Bothaville Fm	Kaapvaal	26	-2.51	Veizer et al. (1990)
Bothaville Fm	Kaapvaal	26	-2.13	Veizer et al. (1990)
Bothaville Fm	Kaapvaal	26	-2.1	Veizer et al. (1990)
Carawine Dolomite	Nullagine, W. Australia	26	-0.3	Veizer et al. (1990)
Carawine Dolomite	Nullagine, W. Australia	26	0.91	Veizer et al. (1990)
Carawine Dolomite	Nullagine, W. Australia	26	-0.23	Veizer et al. (1990)
Carawine Dolomite	Nullagine, W. Australia	26	-1.3	Veizer et al. (1990)
Carawine Dolomite	Nullagine, W. Australia	26	-3.57	Veizer et al. (1990)
Carawine Dolomite	Nullagine, W. Australia	26	0.53	Veizer et al. (1990)
Carawine Dolomite	Nullagine, W. Australia	26	-0.56	Veizer et al. (1990)
Carawine Dolomite	Nullagine, W. Australia	26	0.38	Veizer et al. (1990)
Carawine Dolomite	Nullagine, W. Australia	26	0.42	Veizer et al. (1990)
Carawine Dolomite	Nullagine, W. Australia	26	0.08	Veizer et al. (1990)
Carawine Dolomite	Nullagine, W. Australia	26	0.07	Veizer et al. (1990)
Carawine Dolomite	Nullagine, W. Australia	26	0.57	Veizer et al. (1990)
Carawine Dolomite	Nullagine, W. Australia	26	0.46	Veizer et al. (1990)
Carawine Dolomite	Nullagine, W. Australia	26	0.22	Veizer et al. (1990)
Carawine Dolomite	Nullagine, W. Australia	26	0.38	Veizer et al. (1990)
Carawine Dolomite	Nullagine, W. Australia	26	0.28	Veizer et al. (1990)
Carawine Dolomite	Nullagine, W. Australia	26	0.49	Veizer et al. (1990)
Carawine Dolomite	Nullagine, W. Australia	26	0.37	Veizer et al. (1990)
Carawine Dolomite	Nullagine, W. Australia	26	0.48	Veizer et al. (1990)
Carawine Dolomite	Nullagine, W. Australia	26	0.14	Veizer et al. (1990)
Carawine Dolomite	Nullagine, W. Australia	26	-0.27	Veizer et al. (1990)
Carawine Dolomite	Nullagine, W. Australia	26	-0.77	Veizer et al. (1990)
Carawine Dolomite	Nullagine, W. Australia	26	0.32	Veizer et al. (1990)
Carawine Dolomite	Nullagine, W. Australia	26	0.52	Veizer et al. (1990)
Carawine Dolomite	Nullagine, W. Australia	26	0.65	Veizer et al. (1990)
Carawine Dolomite	Nullagine, W. Australia	26	0.83	Veizer et al. (1990)
Carawine Dolomite	Nullagine, W. Australia	26	-0.1	Veizer et al. (1990)
Carawine Dolomite	Nullagine, W. Australia	26	0.08	Veizer et al. (1990)
Carawine Dolomite	Nullagine, W. Australia	26	0.47	Veizer et al. (1990)
Carawine Dolomite	Nullagine, W. Australia	26	0.29	Veizer et al. (1990)
Chitradurga Group	Dharwar Craton	25	-0.7	Kumar et al. (1983)
Chitradurga Group	Dharwar Craton	25	-0.2	Kumar et al. (1983)
Chitradurga Group	Dharwar Craton	25	-0.5	Kumar et al. (1983)
Chitradurga Group	Dharwar Craton	25	0	Kumar et al. (1983)
Chitradurga Group	Dharwar Craton	25	0.2	Kumar et al. (1983)
Chitradurga Group	Dharwar Craton	25	-0.3	Kumar et al. (1983)
Chitradurga Group	Dharwar Craton	25	0	Kumar et al. (1983)
Chitradurga Group	Dharwar Craton	25	-0.6	Kumar et al. (1983)
Chitradurga Group	Dharwar Craton	25	0.2	Kumar et al. (1983)
Chitradurga Group	Dharwar Craton	25	-0.6	Kumar et al. (1983)
Chitradurga Group	Dharwar Craton	25	0.1	Kumar et al. (1983)
Chitradurga Group	Dharwar Craton	25	0	Kumar et al. (1983)
Chitradurga Group	Dharwar Craton	25	0	Kumar et al. (1983)
Chitradurga Group	Dharwar Craton	25	0.3	Kumar et al. (1983)
Yellowknife Supergroup	NWT, Canada	25	-2.97	Veizer et al. (1989)
Yellowknife Supergroup	NWT, Canada	25	-4.59	Veizer et al. (1989)
Yellowknife Supergroup	NWT, Canada	25	-2.43	Veizer et al. (1989)
Yellowknife Supergroup	NWT, Canada	25	-0.76	Veizer et al. (1989)
Yellowknife Supergroup	NWT, Canada	25	-9.62	Veizer et al. (1989)
Yellowknife Supergroup	NWT, Canada	25	-0.75	Veizer et al. (1989)
Yellowknife Supergroup	NWT, Canada	25	-1.5	Veizer et al. (1989)
Yellowknife Supergroup	NWT, Canada	25	-1	Veizer et al. (1989)
Yellowknife Supergroup	NWT, Canada	25	-0.3	Veizer et al. (1989)
Yellowknife Supergroup	NWT, Canada	25	-3.2	Veizer et al. (1989)
Yellowknife Supergroup	NWT, Canada	25	-5.7	Veizer et al. (1989)
Yellowknife Supergroup	NWT, Canada	25	-6	Veizer et al. (1989)
Yellowknife Supergroup	NWT, Canada	25	-5.97	Veizer et al. (1989)
Yellowknife Supergroup	NWT, Canada	25	-5.4	Veizer et al. (1989)
Wiitenoom Dolomite	Hamersley Basin	25	-0.1	Schidlowski et al. (1983)
Wiitenoom Dolomite	Hamersley Basin	25	-0.1	Schidlowski et al. (1983)
Wiitenoom Dolomite	Hamersley Basin	25	0.4	Schidlowski et al. (1983)
Wiitenoom Dolomite	Hamersley Basin	25	0.5	Schidlowski et al. (1983)
Wittenoom Dolomite	Hamersley Basin	25	0.3	Baur et al. (1985)
Wittenoom Dolomite	Hamersley Basin	25	0.5	Baur et al. (1985)
Wittenoom Dolomite	Hamersley Basin	25	0.6	Baur et al. (1985)
Wittenoom Dolomite	Hamersley Basin	25	-6.4	Becker & Clayton (1972)
Wittenoom Dolomite	Hamersley Basin	25	-6.3	Becker & Clayton (1972)
Wittenoom Dolomite	Hamersley Basin	25	-4.9	Becker & Clayton (1972)
Wittenoom Dolomite	Hamersley Basin	25	-4.7	Becker & Clayton (1972)
Wittenoom Dolomite	Hamersley Basin	25	-4.7	Becker & Clayton (1972)
Wittenoom Dolomite	Hamersley Basin	25	-1.8	Becker & Clayton (1972)
Wittenoom Dolomite	Hamersley Basin	25	-1.8	Becker & Clayton (1972)
Wittenoom Dolomite	Hamersley Basin	25	-1.8	Becker & Clayton (1972)
Wittenoom Dolomite	Hamersley Basin	25	-1.6	Becker & Clayton (1972)
Wittenoom Dolomite	Hamersley Basin	25	-1.2	Becker & Clayton (1972)
Wittenoom Dolomite	Hamersley Basin	25	-1.1	Becker & Clayton (1972)
Wittenoom Dolomite	Hamersley Basin	25	-1.1	Becker & Clayton (1972)
Wittenoom Dolomite	Hamersley Basin	25	-0.8	Becker & Clayton (1972)
Wittenoom Dolomite	Hamersley Basin	25	-0.8	Becker & Clayton (1972)
Wittenoom Dolomite	Hamersley Basin	25	-0.3	Becker & Clayton (1972)
Wittenoom Dolomite	Hamersley Basin	25	-0.1	Becker & Clayton (1972)
Wittenoom Dolomite	Hamersley Basin	25	-5.7	Becker & Clayton (1972)
Wittenoom Dolomite	Hamersley Basin	25	-1.6	Becker & Clayton (1972)
Wittenoom Dolomite	Hamersley Basin	25	-1.8	Becker & Clayton (1972)
Wittenoom Dolomite	Hamersley Basin	25	0.1	Becker & Clayton (1972)
Wittenoom Dolomite	Hamersley Basin	25	0.4	Becker & Clayton (1972)
Wittenoom Dolomite	Hamersley Basin	25	-0.02	Veizer et al. (1990)
Wittenoom Dolomite	Hamersley Basin	25	0.27	Veizer et al. (1990)
Wittenoom Dolomite	Hamersley Basin	25	0.24	Veizer et al. (1990)
Wittenoom Dolomite	Hamersley Basin	25	0.28	Veizer et al. (1990)
Wittenoom Dolomite	Hamersley Basin	25	0.24	Veizer et al. (1990)
Wittenoom Dolomite	Hamersley Basin	25	0.22	Veizer et al. (1990)
Wittenoom Dolomite	Hamersley Basin	25	0.29	Veizer et al. (1990)
Wittenoom Dolomite	Hamersley Basin	25	0.29	Veizer et al. (1990)
Wittenoom Dolomite	Hamersley Basin	25	0.25	Veizer et al. (1990)
Wittenoom Dolomite	Hamersley Basin	25	0.3	Veizer et al. (1990)
Wittenoom Dolomite	Hamersley Basin	25	0.16	Veizer et al. (1990)
Wittenoom Dolomite	Hamersley Basin	25	0.28	Veizer et al. (1990)
Wittenoom Dolomite	Hamersley Basin	25	0.26	Veizer et al. (1990)
Wittenoom Dolomite	Hamersley Basin	25	0.43	Veizer et al. (1990)
Wittenoom Dolomite	Hamersley Basin	25	0.58	Veizer et al. (1990)
Wittenoom Dolomite	Hamersley Basin	25	0.27	Veizer et al. (1990)
Wittenoom Dolomite	Hamersley Basin	25	0.31	Veizer et al. (1990)
Wittenoom Dolomite	Hamersley Basin	25	0.38	Veizer et al. (1990)
Wittenoom Dolomite	Hamersley Basin	25	0.26	Veizer et al. (1990)
Wittenoom Dolomite	Hamersley Basin	25	0.28	Veizer et al. (1990)
Wittenoom Dolomite	Hamersley Basin	25	0.24	Veizer et al. (1990)
Wittenoom Dolomite	Hamersley Basin	25	0.25	Veizer et al. (1990)
Wittenoom Dolomite	Hamersley Basin	25	0.29	Veizer et al. (1990)
Wittenoom Dolomite	Hamersley Basin	25	0.28	Veizer et al. (1990)
Wittenoom Dolomite	Hamersley Basin	25	0.24	Veizer et al. (1990)
Wittenoom Dolomite	Hamersley Basin	25	0.28	Veizer et al. (1990)
Wittenoom Dolomite	Hamersley Basin	25	0.25	Veizer et al. (1990)
Wittenoom Dolomite	Hamersley Basin	25	0.35	Veizer et al. (1990)
Wittenoom Dolomite	Hamersley Basin	25	0.34	Veizer et al. (1990)
Wittenoom Dolomite	Hamersley Basin	25	0.41	Veizer et al. (1990)
Wittenoom Dolomite	Hamersley Basin	25	0.29	Veizer et al. (1990)
Wittenoom Dolomite	Hamersley Basin	25	0.41	Veizer et al. (1990)
Wittenoom Dolomite	Hamersley Basin	25	0.62	Veizer et al. (1990)
Wittenoom Dolomite	Hamersley Basin	25	0.56	Veizer et al. (1990)
Wittenoom Dolomite	Hamersley Basin	25	0.62	Veizer et al. (1990)
Wittenoom Dolomite	Hamersley Basin	25	0.54	Veizer et al. (1990)
Wittenoom Dolomite	Hamersley Basin	25	1.05	Veizer et al. (1990)
Wittenoom Dolomite	Hamersley Basin	25	0.9	Veizer et al. (1990)
Wittenoom Dolomite	Hamersley Basin	25	1.15	Veizer et al. (1990)
Wittenoom Dolomite	Hamersley Basin	25	0.84	Veizer et al. (1990)
Wittenoom Dolomite	Hamersley Basin	25	1.3	Veizer et al. (1990)
Wittenoom Dolomite	Hamersley Basin	25	0.479625	Lindsay & Brasier (2002)
Wittenoom Dolomite	Hamersley Basin	25	0.61436	Lindsay & Brasier (2002)
Wittenoom Dolomite	Hamersley Basin	25	0.432075	Lindsay & Brasier (2002)
Wittenoom Dolomite	Hamersley Basin	25	0.428548	Lindsay & Brasier (2002)
Wittenoom Dolomite	Hamersley Basin	25	0.403701	Lindsay & Brasier (2002)
Wittenoom Dolomite	Hamersley Basin	25	0.381731	Lindsay & Brasier (2002)
Wittenoom Dolomite	Hamersley Basin	25	0.380047	Lindsay & Brasier (2002)
Wittenoom Dolomite	Hamersley Basin	25	0.377374	Lindsay & Brasier (2002)
Wittenoom Dolomite	Hamersley Basin	25	0.362675	Lindsay & Brasier (2002)
Wittenoom Dolomite	Hamersley Basin	25	0.322502	Lindsay & Brasier (2002)
Wittenoom Dolomite	Hamersley Basin	25	0.306475	Lindsay & Brasier (2002)
Wittenoom Dolomite	Hamersley Basin	25	0.291943	Lindsay & Brasier (2002)
Wittenoom Dolomite	Hamersley Basin	25	0.278121	Lindsay & Brasier (2002)
Wittenoom Dolomite	Hamersley Basin	25	0.274206	Lindsay & Brasier (2002)
Wittenoom Dolomite	Hamersley Basin	25	0.247662	Lindsay & Brasier (2002)
Wittenoom Dolomite	Hamersley Basin	25	0.230768	Lindsay & Brasier (2002)
Wittenoom Dolomite	Hamersley Basin	25	0.217896	Lindsay & Brasier (2002)
Wittenoom Dolomite	Hamersley Basin	25	0.212844	Lindsay & Brasier (2002)
Wittenoom Dolomite	Hamersley Basin	25	0.191722	Lindsay & Brasier (2002)
Wittenoom Dolomite	Hamersley Basin	25	0.186049	Lindsay & Brasier (2002)
Wittenoom Dolomite	Hamersley Basin	25	0.18505	Lindsay & Brasier (2002)
Wittenoom Dolomite	Hamersley Basin	25	0.118004	Lindsay & Brasier (2002)
Wittenoom Dolomite	Hamersley Basin	25	0.169279	Lindsay & Brasier (2002)
Wittenoom Dolomite	Hamersley Basin	25	0.0518377	Lindsay & Brasier (2002)
Wittenoom Dolomite	Hamersley Basin	25	0.0874205	Lindsay & Brasier (2002)
Wittenoom Dolomite	Hamersley Basin	25	0.152295	Lindsay & Brasier (2002)
Wittenoom Dolomite	Hamersley Basin	25	0.0838464	Lindsay & Brasier (2002)
Wittenoom Dolomite	Hamersley Basin	25	0.0750559	Lindsay & Brasier (2002)
Wittenoom Dolomite	Hamersley Basin	25	0.141707	Lindsay & Brasier (2002)
Wittenoom Dolomite	Hamersley Basin	25	0.0607816	Lindsay & Brasier (2002)
Wittenoom Dolomite	Hamersley Basin	25	0.137455	Lindsay & Brasier (2002)
Wittenoom Dolomite	Hamersley Basin	25	0.0917483	Lindsay & Brasier (2002)
Wittenoom Dolomite	Hamersley Basin	25	-0.0145608	Lindsay & Brasier (2002)
Wittenoom Dolomite	Hamersley Basin	25	-0.0251623	Lindsay & Brasier (2002)
Wittenoom Dolomite	Hamersley Basin	25	-0.032	Lindsay & Brasier (2002)
Wittenoom Dolomite	Hamersley Basin	25	-0.0352805	Lindsay & Brasier (2002)
Wittenoom Dolomite	Hamersley Basin	25	-0.037	Lindsay & Brasier (2002)
Wittenoom Dolomite	Hamersley Basin	25	-0.0446208	Lindsay & Brasier (2002)
Wittenoom Dolomite	Hamersley Basin	25	-0.0597262	Lindsay & Brasier (2002)
Wittenoom Dolomite	Hamersley Basin	25	-0.0712524	Lindsay & Brasier (2002)
Wittenoom Dolomite	Hamersley Basin	25	-0.0897693	Lindsay & Brasier (2002)
Wittenoom Dolomite	Hamersley Basin	25	-0.103429	Lindsay & Brasier (2002)
Wittenoom Dolomite	Hamersley Basin	25	-0.129032	Lindsay & Brasier (2002)
Wittenoom Dolomite	Hamersley Basin	25	-0.133749	Lindsay & Brasier (2002)
Wittenoom Dolomite	Hamersley Basin	25	-0.147979	Lindsay & Brasier (2002)
Wittenoom Dolomite	Hamersley Basin	25	-0.166141	Lindsay & Brasier (2002)
Wittenoom Dolomite	Hamersley Basin	25	-0.18301	Lindsay & Brasier (2002)
Wittenoom Dolomite	Hamersley Basin	25	-0.20583	Lindsay & Brasier (2002)
Wittenoom Dolomite	Hamersley Basin	25	-0.314706	Lindsay & Brasier (2002)
Wittenoom Dolomite	Hamersley Basin	25	-0.315842	Lindsay & Brasier (2002)
Wittenoom Dolomite	Hamersley Basin	25	-0.490198	Lindsay & Brasier (2002)
Wittenoom Dolomite	Hamersley Basin	25	-0.521996	Lindsay & Brasier (2002)
Wittenoom Dolomite	Hamersley Basin	25	-0.750711	Lindsay & Brasier (2002)
Wittenoom Dolomite	Hamersley Basin	25	-0.779082	Lindsay & Brasier (2002)
Wittenoom Dolomite	Hamersley Basin	25	-2.14166	Lindsay & Brasier (2002)
Wittenoom (Parraburdoo mbr)	Hamersley Basin	25	0.79	Lindsay & Brasier (2002)
Wittenoom (Parraburdoo mbr)	Hamersley Basin	25	0.512218	Lindsay & Brasier (2002)
Wittenoom (Parraburdoo mbr)	Hamersley Basin	25	0.498	Lindsay & Brasier (2002)
Wittenoom (Parraburdoo mbr)	Hamersley Basin	25	0.44	Lindsay & Brasier (2002)
Wittenoom (Parraburdoo mbr)	Hamersley Basin	25	0.429	Lindsay & Brasier (2002)
Wittenoom (Parraburdoo mbr)	Hamersley Basin	25	0.36482	Lindsay & Brasier (2002)
Wittenoom (Parraburdoo mbr)	Hamersley Basin	25	0.362665	Lindsay & Brasier (2002)
Wittenoom (Parraburdoo mbr)	Hamersley Basin	25	0.362	Lindsay & Brasier (2002)
Wittenoom (Parraburdoo mbr)	Hamersley Basin	25	0.329	Lindsay & Brasier (2002)
Wittenoom (Parraburdoo mbr)	Hamersley Basin	25	0.313	Lindsay & Brasier (2002)
Wittenoom (Parraburdoo mbr)	Hamersley Basin	25	0.304	Lindsay & Brasier (2002)
Wittenoom (Parraburdoo mbr)	Hamersley Basin	25	0.296144	Lindsay & Brasier (2002)
Wittenoom (Parraburdoo mbr)	Hamersley Basin	25	0.277	Lindsay & Brasier (2002)
Wittenoom (Parraburdoo mbr)	Hamersley Basin	25	0.276	Lindsay & Brasier (2002)
Wittenoom (Parraburdoo mbr)	Hamersley Basin	25	0.247	Lindsay & Brasier (2002)
Wittenoom (Parraburdoo mbr)	Hamersley Basin	25	0.238	Lindsay & Brasier (2002)
Wittenoom (Parraburdoo mbr)	Hamersley Basin	25	0.222	Lindsay & Brasier (2002)
Wittenoom (Parraburdoo mbr)	Hamersley Basin	25	0.212197	Lindsay & Brasier (2002)
Wittenoom (Parraburdoo mbr)	Hamersley Basin	25	0.212	Lindsay & Brasier (2002)
Wittenoom (Parraburdoo mbr)	Hamersley Basin	25	0.212	Lindsay & Brasier (2002)
Wittenoom (Parraburdoo mbr)	Hamersley Basin	25	0.205798	Lindsay & Brasier (2002)
Wittenoom (Parraburdoo mbr)	Hamersley Basin	25	0.203	Lindsay & Brasier (2002)
Wittenoom (Parraburdoo mbr)	Hamersley Basin	25	0.202415	Lindsay & Brasier (2002)
Wittenoom (Parraburdoo mbr)	Hamersley Basin	25	0.198	Lindsay & Brasier (2002)
Wittenoom (Parraburdoo mbr)	Hamersley Basin	25	0.189802	Lindsay & Brasier (2002)
Wittenoom (Parraburdoo mbr)	Hamersley Basin	25	0.188035	Lindsay & Brasier (2002)
Wittenoom (Parraburdoo mbr)	Hamersley Basin	25	0.181	Lindsay & Brasier (2002)
Wittenoom (Parraburdoo mbr)	Hamersley Basin	25	0.175	Lindsay & Brasier (2002)
Wittenoom (Parraburdoo mbr)	Hamersley Basin	25	0.160764	Lindsay & Brasier (2002)
Wittenoom (Parraburdoo mbr)	Hamersley Basin	25	0.153	Lindsay & Brasier (2002)
Wittenoom (Parraburdoo mbr)	Hamersley Basin	25	0.152268	Lindsay & Brasier (2002)
Wittenoom (Parraburdoo mbr)	Hamersley Basin	25	0.147385	Lindsay & Brasier (2002)
Wittenoom (Parraburdoo mbr)	Hamersley Basin	25	0.13864	Lindsay & Brasier (2002)
Wittenoom (Parraburdoo mbr)	Hamersley Basin	25	0.136155	Lindsay & Brasier (2002)
Wittenoom (Parraburdoo mbr)	Hamersley Basin	25	0.13558	Lindsay & Brasier (2002)
Wittenoom (Parraburdoo mbr)	Hamersley Basin	25	0.132029	Lindsay & Brasier (2002)
Wittenoom (Parraburdoo mbr)	Hamersley Basin	25	0.130324	Lindsay & Brasier (2002)
Wittenoom (Parraburdoo mbr)	Hamersley Basin	25	0.127414	Lindsay & Brasier (2002)
Wittenoom (Parraburdoo mbr)	Hamersley Basin	25	0.125876	Lindsay & Brasier (2002)
Wittenoom (Parraburdoo mbr)	Hamersley Basin	25	0.110699	Lindsay & Brasier (2002)
Wittenoom (Parraburdoo mbr)	Hamersley Basin	25	0.0999	Lindsay & Brasier (2002)
Wittenoom (Parraburdoo mbr)	Hamersley Basin	25	0.091	Lindsay & Brasier (2002)
Wittenoom (Parraburdoo mbr)	Hamersley Basin	25	0.0880481	Lindsay & Brasier (2002)
Wittenoom (Parraburdoo mbr)	Hamersley Basin	25	0.086767	Lindsay & Brasier (2002)
Wittenoom (Parraburdoo mbr)	Hamersley Basin	25	0.0866664	Lindsay & Brasier (2002)
Wittenoom (Parraburdoo mbr)	Hamersley Basin	25	0.0690641	Lindsay & Brasier (2002)
Wittenoom (Parraburdoo mbr)	Hamersley Basin	25	0.057891	Lindsay & Brasier (2002)
Wittenoom (Parraburdoo mbr)	Hamersley Basin	25	0.054	Lindsay & Brasier (2002)
Wittenoom (Parraburdoo mbr)	Hamersley Basin	25	0.0489436	Lindsay & Brasier (2002)
Wittenoom (Parraburdoo mbr)	Hamersley Basin	25	0.0438118	Lindsay & Brasier (2002)
Wittenoom (Parraburdoo mbr)	Hamersley Basin	25	0.03994	Lindsay & Brasier (2002)
Wittenoom (Parraburdoo mbr)	Hamersley Basin	25	0.033	Lindsay & Brasier (2002)
Wittenoom (Parraburdoo mbr)	Hamersley Basin	25	0.0310212	Lindsay & Brasier (2002)
Wittenoom (Parraburdoo mbr)	Hamersley Basin	25	0.0272632	Lindsay & Brasier (2002)
Wittenoom (Parraburdoo mbr)	Hamersley Basin	25	0.016	Lindsay & Brasier (2002)
Wittenoom (Parraburdoo mbr)	Hamersley Basin	25	0.007	Lindsay & Brasier (2002)
Wittenoom (Parraburdoo mbr)	Hamersley Basin	25	0.00510125	Lindsay & Brasier (2002)
Wittenoom (Parraburdoo mbr)	Hamersley Basin	25	-0.00419813	Lindsay & Brasier (2002)
Wittenoom (Parraburdoo mbr)	Hamersley Basin	25	-0.00589501	Lindsay & Brasier (2002)
Wittenoom (Parraburdoo mbr)	Hamersley Basin	25	-0.012	Lindsay & Brasier (2002)
Wittenoom (Parraburdoo mbr)	Hamersley Basin	25	-0.0153805	Lindsay & Brasier (2002)
Wittenoom (Parraburdoo mbr)	Hamersley Basin	25	-0.016858	Lindsay & Brasier (2002)
Wittenoom (Parraburdoo mbr)	Hamersley Basin	25	-0.021	Lindsay & Brasier (2002)
Wittenoom (Parraburdoo mbr)	Hamersley Basin	25	-0.0299203	Lindsay & Brasier (2002)
Wittenoom (Parraburdoo mbr)	Hamersley Basin	25	-0.0431174	Lindsay & Brasier (2002)
Wittenoom (Parraburdoo mbr)	Hamersley Basin	25	-0.0434743	Lindsay & Brasier (2002)
Wittenoom (Parraburdoo mbr)	Hamersley Basin	25	-0.0493341	Lindsay & Brasier (2002)
Wittenoom (Parraburdoo mbr)	Hamersley Basin	25	-0.055643	Lindsay & Brasier (2002)
Wittenoom (Parraburdoo mbr)	Hamersley Basin	25	-0.058297	Lindsay & Brasier (2002)
Wittenoom (Parraburdoo mbr)	Hamersley Basin	25	-0.07	Lindsay & Brasier (2002)
Wittenoom (Parraburdoo mbr)	Hamersley Basin	25	-0.0747263	Lindsay & Brasier (2002)
Wittenoom (Parraburdoo mbr)	Hamersley Basin	25	-0.101629	Lindsay & Brasier (2002)
Wittenoom (Parraburdoo mbr)	Hamersley Basin	25	-0.126818	Lindsay & Brasier (2002)
Wittenoom (Parraburdoo mbr)	Hamersley Basin	25	-0.147419	Lindsay & Brasier (2002)
Wittenoom (Parraburdoo mbr)	Hamersley Basin	25	-0.150539	Lindsay & Brasier (2002)
Wittenoom (Parraburdoo mbr)	Hamersley Basin	25	-0.151917	Lindsay & Brasier (2002)
Wittenoom (Parraburdoo mbr)	Hamersley Basin	25	-0.178907	Lindsay & Brasier (2002)
Wittenoom (Parraburdoo mbr)	Hamersley Basin	25	-0.181155	Lindsay & Brasier (2002)
Wittenoom (Parraburdoo mbr)	Hamersley Basin	25	-0.210304	Lindsay & Brasier (2002)
Wittenoom (Parraburdoo mbr)	Hamersley Basin	25	-0.211024	Lindsay & Brasier (2002)
Wittenoom (Parraburdoo mbr)	Hamersley Basin	25	-0.256082	Lindsay & Brasier (2002)
Wittenoom (Parraburdoo mbr)	Hamersley Basin	25	-0.283018	Lindsay & Brasier (2002)
Wittenoom (Parraburdoo mbr)	Hamersley Basin	25	-0.294295	Lindsay & Brasier (2002)
Wittenoom (Parraburdoo mbr)	Hamersley Basin	25	-0.365102	Lindsay & Brasier (2002)
Malmani Subgroup	Transvaal	25	-0.8	Schidlowski et al. (1983)
Malmani Subgroup	Transvaal	25	-0.9	Schidlowski et al. (1983)
Malmani Subgroup	Transvaal	25	-0.7	Schidlowski et al. (1983)
Malmani Subgroup	Transvaal	25	-0.5	Schidlowski et al. (1983)
Malmani Subgroup	Transvaal	25	-0.8	Schidlowski et al. (1983)
Malmani Subgroup	Transvaal	25	-0.1	Schidlowski et al. (1983)
Malmani Subgroup	Transvaal	25	-0.8	Schidlowski et al. (1983)
Malmani Subgroup	Transvaal	25	-0.9	Schidlowski et al. (1983)
Malmani Subgroup	Transvaal	25	-0.5	Schidlowski et al. (1983)
Malmani Subgroup	Transvaal	25	-0.9	Schidlowski et al. (1983)
Malmani Subgroup	Transvaal	25	-1.3	Schidlowski et al. (1983)
Malmani Subgroup	Transvaal	25	-1	Schidlowski et al. (1983)
Malmani Subgroup	Transvaal	25	-0.6	Schidlowski et al. (1983)
Klippan Fm	Kaapvaal	25	-4.32	Veizer et al. (1990)
Klippan Fm	Kaapvaal	25	-3.67	Veizer et al. (1990)
Klippan Fm	Kaapvaal	25	-3.19	Veizer et al. (1990)
Klippan Fm	Kaapvaal	25	-4.34	Veizer et al. (1990)
Klippan Fm	Kaapvaal	25	-4.5	Veizer et al. (1990)
Klippan Fm	Kaapvaal	25	-4	Veizer et al. (1990)
Klippan Fm	Kaapvaal	25	-3	Veizer et al. (1990)
Malmani Dolomite	Transvaal	25	-2.21	Veizer et al. (1992)
Malmani Dolomite	Transvaal	25	-2.01	Veizer et al. (1992)
Malmani Dolomite	Transvaal	25	-0.68	Veizer et al. (1992)
Malmani Dolomite	Transvaal	25	-0.78	Veizer et al. (1992)
Malmani Dolomite	Transvaal	25	-0.67	Veizer et al. (1992)
Malmani Dolomite	Transvaal	25	-1.39	Veizer et al. (1992)
Malmani Dolomite	Transvaal	25	-1.43	Veizer et al. (1992)
Malmani Dolomite	Transvaal	25	-0.84	Veizer et al. (1992)
Malmani Dolomite	Transvaal	25	-0.52	Veizer et al. (1992)
Malmani Dolomite	Transvaal	25	0.15	Veizer et al. (1992)
Malmani Dolomite	Transvaal	25	1.52	Veizer et al. (1992)
Malmani Dolomite	Transvaal	25	-0.76	Veizer et al. (1992)
Malmani Dolomite	Transvaal	25	0.48	Veizer et al. (1992)
Malmani Dolomite	Transvaal	25	-0.63	Veizer et al. (1992)
Malmani Dolomite	Transvaal	25	-0.83	Veizer et al. (1992)
Malmani Dolomite	Transvaal	25	-0.46	Veizer et al. (1992)
Malmani Dolomite	Transvaal	25	-0.9	Veizer et al. (1992)
Malmani Dolomite	Transvaal	25	-0.63	Veizer et al. (1992)
Malmani Dolomite	Transvaal	25	-0.64	Veizer et al. (1992)
Malmani Dolomite	Transvaal	25	-0.81	Veizer et al. (1992)
Malmani Dolomite	Transvaal	25	-0.98	Veizer et al. (1992)
Malmani Dolomite	Transvaal	25	-0.54	Veizer et al. (1992)
Malmani Dolomite	Transvaal	25	-0.73	Veizer et al. (1992)
Malmani Dolomite	Transvaal	25	-1.04	Veizer et al. (1992)
Malmani Dolomite	Transvaal	25	-0.82	Veizer et al. (1992)
Malmani Dolomite	Transvaal	25	-0.34	Veizer et al. (1992)
Malmani Dolomite	Transvaal	25	-0.94	Veizer et al. (1992)
Malmani Dolomite	Transvaal	25	-1.17	Veizer et al. (1992)
Malmani Dolomite	Transvaal	25	0.02	Veizer et al. (1992)
Malmani Dolomite	Transvaal	25	-0.89	Veizer et al. (1992)
Malmani Dolomite	Transvaal	25	-0.09	Veizer et al. (1992)
Malmani Dolomite	Transvaal	25	1.55	Veizer et al. (1992)
Malmani Dolomite	Transvaal	25	-0.53	Veizer et al. (1992)
Malmani Dolomite	Transvaal	25	-0.85	Veizer et al. (1992)
Malmani Dolomite	Transvaal	25	-0.12	Veizer et al. (1992)
Malmani Dolomite	Transvaal	25	-0.68	Veizer et al. (1992)
Malmani Dolomite	Transvaal	25	-0.57	Veizer et al. (1992)
Malmani Dolomite	Transvaal	25	-0.38	Veizer et al. (1992)
Malmani Dolomite	Transvaal	25	-0.54	Veizer et al. (1992)
Malmani Dolomite	Transvaal	25	-0.55	Veizer et al. (1992)
Malmani Dolomite	Transvaal	25	0.35	Veizer et al. (1992)
Malmani Dolomite	Transvaal	25	0.21	Veizer et al. (1992)
Malmani Dolomite	Transvaal	25	-0.74	Veizer et al. (1992)
Malmani Dolomite	Transvaal	25	-0.29	Veizer et al. (1992)
Malmani Dolomite	Transvaal	25	-0.64	Veizer et al. (1992)
Malmani Dolomite	Transvaal	25	-0.8	Veizer et al. (1992)
Malmani Dolomite	Transvaal	25	-0.56	Veizer et al. (1992)
Malmani Dolomite	Transvaal	25	0.25	Veizer et al. (1992)
Malmani Dolomite	Transvaal	25	0.26	Veizer et al. (1992)
Malmani Dolomite	Transvaal	25	-0.62	Veizer et al. (1992)
Malmani Dolomite	Transvaal	25	-0.66	Veizer et al. (1992)
Malmani Dolomite	Transvaal	25	-0.49	Veizer et al. (1992)
Malmani Dolomite	Transvaal	25	-0.37	Veizer et al. (1992)
Malmani Dolomite	Transvaal	25	0.31	Veizer et al. (1992)
Malmani Dolomite	Transvaal	25	-0.2	Veizer et al. (1992)
Malmani Dolomite	Transvaal	25	-0.82	Veizer et al. (1992)
Malmani Dolomite	Transvaal	25	0.25	Veizer et al. (1992)
Malmani Dolomite	Transvaal	25	-0.68	Veizer et al. (1992)
Malmani Dolomite	Transvaal	25	-1.19	Veizer et al. (1992)
Malmani Dolomite	Transvaal	25	-0.39	Veizer et al. (1992)
Malmani Dolomite	Transvaal	25	0.03	Veizer et al. (1992)
Malmani Dolomite	Transvaal	25	0.04	Veizer et al. (1992)
Malmani Dolomite	Transvaal	25	-0.54	Veizer et al. (1992)
Malmani Dolomite	Transvaal	25	0.45	Veizer et al. (1992)
Malmani Dolomite	Transvaal	25	-0.54	Veizer et al. (1992)
Malmani Dolomite	Transvaal	25	-0.48	Veizer et al. (1992)
Malmani Dolomite	Transvaal	25	0.32	Veizer et al. (1992)
Malmani Dolomite	Transvaal	25	0.18	Veizer et al. (1992)
Malmani Dolomite	Transvaal	25	-0.7	Veizer et al. (1992)
Malmani Dolomite	Transvaal	25	0.06	Veizer et al. (1992)
Malmani Dolomite	Transvaal	25	-0.59	Veizer et al. (1992)
Malmani Dolomite	Transvaal	25	0.22	Veizer et al. (1992)
Malmani Dolomite	Transvaal	25	0.22	Veizer et al. (1992)
Malmani Dolomite	Transvaal	25	0.26	Veizer et al. (1992)
Malmani Dolomite	Transvaal	25	0.01	Veizer et al. (1992)
Malmani Dolomite	Transvaal	25	0.06	Veizer et al. (1992)
Malmani Dolomite	Transvaal	25	-0.11	Veizer et al. (1992)
Malmani Dolomite	Transvaal	25	0.01	Veizer et al. (1992)
Malmani Dolomite	Transvaal	25	-0.61	Veizer et al. (1992)
Malmani Dolomite	Transvaal	25	0.03	Veizer et al. (1992)
Malmani Dolomite	Transvaal	25	-0.04	Veizer et al. (1992)
Malmani Dolomite	Transvaal	25	0.01	Veizer et al. (1992)
Malmani Dolomite	Transvaal	25	0.56	Veizer et al. (1992)
Malmani Dolomite	Transvaal	25	0.07	Veizer et al. (1992)
Malmani Dolomite	Transvaal	25	-0.5	Veizer et al. (1992)
Malmani Dolomite	Transvaal	25	0.41	Veizer et al. (1992)
Malmani Dolomite	Transvaal	25	0.2	Veizer et al. (1992)
Malmani Dolomite	Transvaal	25	0.08	Veizer et al. (1992)
Eccles Fm	Campbellrand	25	0.4	Eroglu et al. (2017)
Eccles Fm	Campbellrand	25	0	Eroglu et al. (2017)
Eccles Fm	Campbellrand	25	0.1	Eroglu et al. (2017)
Eccles Fm	Campbellrand	25	0.1	Eroglu et al. (2017)
Eccles Fm	Campbellrand	25	0	Eroglu et al. (2017)
Eccles Fm	Campbellrand	25	0.3	Eroglu et al. (2017)
Eccles Fm	Campbellrand	25	0.1	Eroglu et al. (2017)
Eccles Fm	Campbellrand	25	0	Eroglu et al. (2017)
Eccles Fm	Campbellrand	25	0	Eroglu et al. (2017)
Eccles Fm	Campbellrand	25	0	Eroglu et al. (2017)
Eccles Fm	Campbellrand	25	0.2	Eroglu et al. (2017)
Eccles Fm	Campbellrand	25	0	Eroglu et al. (2017)
Eccles Fm	Campbellrand	25	0.3	Eroglu et al. (2017)
Eccles Fm	Campbellrand	25	0.1	Eroglu et al. (2017)
Eccles Fm	Campbellrand	25	0.2	Eroglu et al. (2017)
Eccles Fm	Campbellrand	25	-0.2	Eroglu et al. (2017)
Eccles Fm	Campbellrand	25	-0.1	Eroglu et al. (2017)
Eccles Fm	Campbellrand	25	0.1	Eroglu et al. (2017)
Eccles Fm	Campbellrand	25	-0.2	Eroglu et al. (2017)
Eccles Fm	Campbellrand	25	0	Eroglu et al. (2017)
Eccles Fm	Campbellrand	25	0.3	Eroglu et al. (2017)
Eccles Fm	Campbellrand	25	0	Eroglu et al. (2017)
Eccles Fm	Campbellrand	25	0	Eroglu et al. (2017)
Eccles Fm	Campbellrand	25	0.1	Eroglu et al. (2017)
Eccles Fm	Campbellrand	25	0	Eroglu et al. (2017)
Eccles Fm	Campbellrand	25	0	Eroglu et al. (2017)
Eccles Fm	Campbellrand	25	0.1	Eroglu et al. (2017)
Eccles Fm	Campbellrand	25	-0.1	Eroglu et al. (2017)
Eccles Fm	Campbellrand	25	-0.3	Eroglu et al. (2017)
Eccles Fm	Campbellrand	25	-0.1	Eroglu et al. (2017)
Eccles Fm	Campbellrand	25	-0.2	Eroglu et al. (2017)
Eccles Fm	Campbellrand	25	0.1	Eroglu et al. (2017)
Eccles Fm	Campbellrand	25	-0.5	Eroglu et al. (2017)
Eccles Fm	Campbellrand	25	-0.6	Eroglu et al. (2017)
Lyttleton Fm	Campbellrand	25	-0.1	Eroglu et al. (2017)
Lyttleton Fm	Campbellrand	25	-0.3	Eroglu et al. (2017)
Lyttleton Fm	Campbellrand	25	-0.3	Eroglu et al. (2017)
Lyttleton Fm	Campbellrand	25	-0.7	Eroglu et al. (2017)
Lyttleton Fm	Campbellrand	25	-0.6	Eroglu et al. (2017)
Montecristo Fm	Campbellrand	25	-0.3	Eroglu et al. (2017)
Montecristo Fm	Campbellrand	25	0	Eroglu et al. (2017)
Montecristo Fm	Campbellrand	25	0.1	Eroglu et al. (2017)
Montecristo Fm	Campbellrand	25	-0.2	Eroglu et al. (2017)
Montecristo Fm	Campbellrand	25	-0.9	Eroglu et al. (2017)
Montecristo Fm	Campbellrand	25	-0.2	Eroglu et al. (2017)
Montecristo Fm	Campbellrand	25	-0.4	Eroglu et al. (2017)
Montecristo Fm	Campbellrand	25	-0.6	Eroglu et al. (2017)
Montecristo Fm	Campbellrand	25	-3.2	Eroglu et al. (2017)
Montecristo Fm	Campbellrand	25	-0.4	Eroglu et al. (2017)
Montecristo Fm	Campbellrand	25	-0.5	Eroglu et al. (2017)
Montecristo Fm	Campbellrand	25	-0.7	Eroglu et al. (2017)
Montecristo Fm	Campbellrand	25	-0.6	Eroglu et al. (2017)
Montecristo Fm	Campbellrand	25	-0.6	Eroglu et al. (2017)
Montecristo Fm	Campbellrand	25	-0.6	Eroglu et al. (2017)
Montecristo Fm	Campbellrand	25	-0.7	Eroglu et al. (2017)
Montecristo Fm	Campbellrand	25	-0.5	Eroglu et al. (2017)
Montecristo Fm	Campbellrand	25	-0.6	Eroglu et al. (2017)
Montecristo Fm	Campbellrand	25	-0.7	Eroglu et al. (2017)
Montecristo Fm	Campbellrand	25	-0.6	Eroglu et al. (2017)
Montecristo Fm	Campbellrand	25	-0.4	Eroglu et al. (2017)
Montecristo Fm	Campbellrand	25	-0.4	Eroglu et al. (2017)
Montecristo Fm	Campbellrand	25	-0.5	Eroglu et al. (2017)
Montecristo Fm	Campbellrand	25	-0.5	Eroglu et al. (2017)
Montecristo Fm	Campbellrand	25	-0.2	Eroglu et al. (2017)
Montecristo Fm	Campbellrand	25	-0.6	Eroglu et al. (2017)
Montecristo Fm	Campbellrand	25	-0.5	Eroglu et al. (2017)
Montecristo Fm	Campbellrand	25	-0.6	Eroglu et al. (2017)
Montecristo Fm	Campbellrand	25	-0.9	Eroglu et al. (2017)
Montecristo Fm	Campbellrand	25	-0.6	Eroglu et al. (2017)
Montecristo Fm	Campbellrand	25	-0.5	Eroglu et al. (2017)
Montecristo Fm	Campbellrand	25	-0.4	Eroglu et al. (2017)
Montecristo Fm	Campbellrand	25	-1	Eroglu et al. (2017)
Montecristo Fm	Campbellrand	25	-0.8	Eroglu et al. (2017)
Montecristo Fm	Campbellrand	25	-0.6	Eroglu et al. (2017)
Montecristo Fm	Campbellrand	25	-0.7	Eroglu et al. (2017)
Montecristo Fm	Campbellrand	25	-0.7	Eroglu et al. (2017)
Montecristo Fm	Campbellrand	25	-1	Eroglu et al. (2017)
Montecristo Fm	Campbellrand	25	-0.6	Eroglu et al. (2017)
Montecristo Fm	Campbellrand	25	-0.5	Eroglu et al. (2017)
Montecristo Fm	Campbellrand	25	-0.5	Eroglu et al. (2017)
Montecristo Fm	Campbellrand	25	-0.6	Eroglu et al. (2017)
Montecristo Fm	Campbellrand	25	-0.6	Eroglu et al. (2017)
Montecristo Fm	Campbellrand	25	-0.6	Eroglu et al. (2017)
Montecristo Fm	Campbellrand	25	-0.6	Eroglu et al. (2017)
Montecristo Fm	Campbellrand	25	-0.6	Eroglu et al. (2017)
Montecristo Fm	Campbellrand	25	-0.7	Eroglu et al. (2017)
Montecristo Fm	Campbellrand	25	-1.2	Eroglu et al. (2017)
Montecristo Fm	Campbellrand	25	-0.5	Eroglu et al. (2017)
Montecristo Fm	Campbellrand	25	-0.6	Eroglu et al. (2017)
Montecristo Fm	Campbellrand	25	-0.9	Eroglu et al. (2017)
Montecristo Fm	Campbellrand	25	-0.8	Eroglu et al. (2017)
Montecristo Fm	Campbellrand	25	-0.8	Eroglu et al. (2017)
Montecristo Fm	Campbellrand	25	-0.6	Eroglu et al. (2017)
Montecristo Fm	Campbellrand	25	-0.8	Eroglu et al. (2017)
Gamohaan Fm	Campbellrand	25	-0.1	Eroglu et al. (2017)
Gamohaan Fm	Campbellrand	25	0.1	Eroglu et al. (2017)
Kogelbeen Fn	Campbellrand	25	-0.7	Eroglu et al. (2017)
Kogelbeen Fn	Campbellrand	25	-0.8	Eroglu et al. (2017)
Kogelbeen Fn	Campbellrand	25	-0.2	Eroglu et al. (2017)
Papkuil Fm	Campbellrand	25	-0.4	Eroglu et al. (2017)
Papkuil Fm	Campbellrand	25	-0.6	Eroglu et al. (2017)
Papkuil Fm	Campbellrand	25	-0.1	Eroglu et al. (2017)
Papkuil Fm	Campbellrand	25	-0.6	Eroglu et al. (2017)
Fairfield Fm	Campbellrand	25	-0.5	Eroglu et al. (2017)
Fairfield Fm	Campbellrand	25	-0.8	Eroglu et al. (2017)
Fairfield Fm	Campbellrand	25	-0.5	Eroglu et al. (2017)
Kamden Fm	Campbellrand	25	-1.3	Eroglu et al. (2017)
Reivilo Fm	Campbellrand	25	-0.4	Eroglu et al. (2017)
Reivilo Fm	Campbellrand	25	-0.3	Eroglu et al. (2017)
Reivilo Fm	Campbellrand	25	-0.9	Eroglu et al. (2017)
Reivilo Fm	Campbellrand	25	-0.2	Eroglu et al. (2017)
Reivilo Fm	Campbellrand	25	-0.3	Eroglu et al. (2017)
Reivilo Fm	Campbellrand	25	-0.5	Eroglu et al. (2017)
Reivilo Fm	Campbellrand	25	-0.4	Eroglu et al. (2017)
Reivilo Fm	Campbellrand	25	-1	Eroglu et al. (2017)
Reivilo Fm	Campbellrand	25	-1.1	Eroglu et al. (2017)
Reivilo Fm	Campbellrand	25	-0.7	Eroglu et al. (2017)
Reivilo Fm	Campbellrand	25	-0.9	Eroglu et al. (2017)
Campbellrand	Campbellrand	25	0.48	Paris et al. (2014)
Campbellrand	Campbellrand	25	0.93	Paris et al. (2014)
Campbellrand	Campbellrand	25	0.15	Paris et al. (2014)
Campbellrand	Campbellrand	25	0.62	Paris et al. (2014)
Campbellrand	Campbellrand	25	0.28	Paris et al. (2014)
Campbellrand	Campbellrand	25	-0.34	Paris et al. (2014)
Campbellrand	Campbellrand	25	-0.65	Paris et al. (2014)
Campbellrand	Campbellrand	25	-0.73	Paris et al. (2014)
Campbellrand	Campbellrand	25	-0.71	Paris et al. (2014)
Campbellrand	Campbellrand	25	-0.72	Paris et al. (2014)
Campbellrand	Campbellrand	25	-0.71	Paris et al. (2014)
Campbellrand	Campbellrand	25	-0.15	Paris et al. (2014)
Campbellrand	Campbellrand	25	-0.13	Paris et al. (2014)
Campbellrand	Campbellrand	25	0.21	Paris et al. (2014)
Campbellrand	Campbellrand	25	-1	Paris et al. (2014)
Campbellrand	Campbellrand	25	-0.92	Paris et al. (2014)
Campbellrand	Campbellrand	25	-1.03	Paris et al. (2014)
Campbellrand	Campbellrand	25	-1.09	Paris et al. (2014)
Campbellrand	Campbellrand	25	-1.08	Paris et al. (2014)
Campbellrand	Campbellrand	25	-0.89	Paris et al. (2014)
Campbellrand	Campbellrand	25	-0.93	Paris et al. (2014)
Campbellrand	Campbellrand	25	-0.84	Paris et al. (2014)
Campbellrand	Campbellrand	25	-0.88	Paris et al. (2014)
Campbellrand	Campbellrand	25	-0.73	Paris et al. (2014)
Campbellrand	Campbellrand	25	-0.62	Paris et al. (2014)
Campbellrand	Campbellrand	25	-1.08	Paris et al. (2014)
Campbellrand	Campbellrand	25	-0.15	Paris et al. (2014)
Campbellrand	Campbellrand	25	-0.18	Paris et al. (2014)
Campbellrand	Campbellrand	25	0.08	Paris et al. (2014)
Campbellrand	Campbellrand	25	-0.11	Paris et al. (2014)
Campbellrand	Campbellrand	25	-1.15	Paris et al. (2014)
Campbellrand	Campbellrand	25	-0.82	Paris et al. (2014)
Campbellrand	Campbellrand	25	-0.71	Paris et al. (2014)
Campbellrand	Campbellrand	25	-0.96	Paris et al. (2014)
Campbellrand	Campbellrand	25	-1.03	Paris et al. (2014)
Campbellrand	Campbellrand	25	-1.07	Paris et al. (2014)
Campbellrand	Campbellrand	25	-0.98	Paris et al. (2014)
Campbellrand	Campbellrand	25	-1.03	Paris et al. (2014)
Campbellrand	Campbellrand	25	-0.98	Paris et al. (2014)
Campbellrand	Campbellrand	25	-0.56	Paris et al. (2014)
Campbellrand	Campbellrand	25	-0.61	Paris et al. (2014)
Campbellrand	Campbellrand	25	-0.64	Paris et al. (2014)
Campbellrand	Campbellrand	25	-0.89	Paris et al. (2014)
Campbellrand	Campbellrand	25	-1.01	Paris et al. (2014)
Ghaap Gp	Griqualand West	25	-1.01	Xu (2011)
Ghaap Gp	Griqualand West	25	-0.2	Xu (2011)
Ghaap Gp	Griqualand West	25	0.4	Xu (2011)
Ghaap Gp	Griqualand West	25	-0.5	Xu (2011)
Ghaap Gp	Griqualand West	25	-0.3	Xu (2011)
Ghaap Gp	Griqualand West	25	0.1	Xu (2011)
Ghaap Gp	Griqualand West	25	-2.4	Xu (2011)
Ghaap Gp	Griqualand West	25	-0.3	Xu (2011)
Ghaap Gp	Griqualand West	25	-1.1	Xu (2011)
Ghaap Gp	Griqualand West	25	0.1	Xu (2011)
Ghaap Gp	Griqualand West	25	-0.2	Xu (2011)
Ghaap Gp	Griqualand West	25	-0.9	Xu (2011)
Ghaap Gp	Griqualand West	25	-0.7	Xu (2011)
Ghaap Gp	Griqualand West	25	-0.9	Xu (2011)
Ghaap Gp	Griqualand West	25	-0.4	Xu (2011)
Ghaap Gp	Griqualand West	25	-0.4	Xu (2011)
Ghaap Gp	Griqualand West	25	-0.7	Xu (2011)
Ghaap Gp	Griqualand West	25	-0.3	Xu (2011)
Ghaap Gp	Griqualand West	25	-0.2	Xu (2011)
Ghaap Gp	Griqualand West	25	-0.5	Xu (2011)
Ghaap Gp	Griqualand West	25	-0.6	Xu (2011)
Ghaap Gp	Griqualand West	25	-0.7	Xu (2011)
Ghaap Gp	Griqualand West	25	-0.5	Xu (2011)
Ghaap Gp	Griqualand West	25	-1.3	Xu (2011)
Ghaap Gp	Griqualand West	25	-0.2	Xu (2011)
Ghaap Gp	Griqualand West	25	-0.3	Xu (2011)
Ghaap Gp	Griqualand West	25	-1	Xu (2011)
Ghaap Gp	Griqualand West	25	-0.5	Xu (2011)
Ghaap Gp	Griqualand West	25	-0.6	Xu (2011)
Ghaap Gp	Griqualand West	25	-0.7	Xu (2011)
Ghaap Gp	Griqualand West	25	-1.7	Xu (2011)
Ghaap Gp	Griqualand West	25	-1.2	Xu (2011)
Ghaap Gp	Griqualand West	25	-0.3	Xu (2011)
Ghaap Gp	Griqualand West	25	-0.3	Xu (2011)
Ghaap Gp	Griqualand West	25	-0.1	Xu (2011)
Ghaap Gp	Griqualand West	25	-0.2	Xu (2011)
Ghaap Gp	Griqualand West	25	-0.5	Xu (2011)
Ghaap Gp	Griqualand West	25	0.2	Xu (2011)
Ghaap Gp	Griqualand West	25	0	Xu (2011)
Ghaap Gp	Griqualand West	25	0	Xu (2011)
Ghaap Gp (Tongwe Fm)	Transvaal Basin	25	-0.8	Guo et al. (2009)
Campbellrand Gp (Gamohaan Fm)	Transvaal Basin	25	-0.3	Guo et al. (2009)
Campbellrand Gp (Reivello Fm)	Transvaal Basin	25	-0.5	Guo et al. (2009)
Campbellrand Gp (Monteville Fm)	Transvaal Basin	25	-0.5	Guo et al. (2009)
Campbellrand Gp (Boomplaas Fm	Transvaal Basin	25	0.3	Guo et al. (2009)
Dolomite Series	Transvaal Basin	25	-0.8	Schidlowski et al. (1975)
Dolomite Series	Transvaal Basin	25	-2.3	Schidlowski et al. (1975)
Dolomite Series	Transvaal Basin	25	-2.8	Schidlowski et al. (1975)
Dolomite Series	Transvaal Basin	25	-0.7	Schidlowski et al. (1975)
Dolomite Series	Transvaal Basin	25	0	Schidlowski et al. (1975)
Dolomite Series	Transvaal Basin	25	-1.1	Schidlowski et al. (1975)
Dolomite Series	Transvaal Basin	25	-0.8	Schidlowski et al. (1975)
Dolomite Series	Transvaal Basin	25	-1.3	Schidlowski et al. (1975)
Dolomite Series	Transvaal Basin	25	0.3	Schidlowski et al. (1975)
Dolomite Series	Transvaal Basin	25	-2.3	Schidlowski et al. (1975)
Dolomite Series	Transvaal Basin	25	-0.7	Schidlowski et al. (1975)
Dolomite Series	Transvaal Basin	25	-0.5	Schidlowski et al. (1975)
Dolomite Series	Transvaal Basin	25	-1.4	Schidlowski et al. (1983)
Dolomite Series	Transvaal Basin	25	-3	Schidlowski et al. (1975)
Dolomite Series	Transvaal Basin	25	-2.9	Schidlowski et al. (1975)
Dolomite Series	Transvaal Basin	25	-3	Schidlowski et al. (1975)
Dolomite Series	Transvaal Basin	25	-0.7	Schidlowski et al. (1975)
Dolomite Series	Transvaal Basin	25	-2.2	Schidlowski et al. (1975)
Dolomite Series	Transvaal Basin	25	-1.7	Schidlowski et al. (1975)
Dolomite Series	Transvaal Basin	25	0.7	Schidlowski et al. (1975)
Dolomite Series	Transvaal Basin	25	-2.1	Schidlowski et al. (1975)
Dolomite Series	Transvaal Basin	25	-1.2	Schidlowski et al. (1975)
Dolomite Series	Transvaal Basin	25	-1.3	Schidlowski et al. (1975)
Dolomite Series	Transvaal Basin	25	-0.8	Schidlowski et al. (1975)
Dolomite Series	Transvaal Basin	25	0.2	Schidlowski et al. (1975)
Dolomite Series	Transvaal Basin	25	-0.9	Schidlowski et al. (1975)
Dolomite Series	Transvaal Basin	25	-0.8	Schidlowski et al. (1975)
Dolomite Series	Transvaal Basin	25	0.2	Schidlowski et al. (1975)
Dolomite Series	Transvaal Basin	25	-0.5	Schidlowski et al. (1975)
Dolomite Series	Transvaal Basin	25	-1	Schidlowski et al. (1975)
Dolomite Series	Transvaal Basin	25	-1.9	Schidlowski et al. (1975)
Dolomite Series	Transvaal Basin	25	-1	Schidlowski et al. (1975)
Dolomite Series	Transvaal Basin	25	-2.7	Schidlowski et al. (1975)
Dolomite Series	Transvaal Basin	25	-1.1	Schidlowski et al. (1975)
Dolomite Series	Transvaal Basin	25	-0.3	Schidlowski et al. (1975)
Dolomite Series	Transvaal Basin	25	-0.5	Schidlowski et al. (1975)
Dolomite Series	Transvaal Basin	25	-0.9	Schidlowski et al. (1975)
Dolomite Series	Transvaal Basin	25	0.3	Schidlowski et al. (1975)
Dolomite Series	Transvaal Basin	25	-0.8	Schidlowski et al. (1975)
Dolomite Series	Transvaal Basin	25	0	Schidlowski et al. (1975)
Dolomite Series	Transvaal Basin	25	0.2	Schidlowski et al. (1975)
Dolomite Series	Transvaal Basin	25	-0.6	Schidlowski et al. (1975)
Dolomite Series	Transvaal Basin	25	0	Schidlowski et al. (1975)
Dolomite Series	Transvaal Basin	25	-1.3	Schidlowski et al. (1975)
Dolomite Series	Transvaal Basin	25	-0.3	Schidlowski et al. (1975)
Dolomite Series	Transvaal Basin	25	-0.9	Schidlowski et al. (1975)
Dolomite Series	Transvaal Basin	25	-1.3	Schidlowski et al. (1975)
Dolomite Series	Transvaal Basin	25	-0.9	Schidlowski et al. (1975)
Dolomite Series	Transvaal Basin	25	-0.5	Schidlowski et al. (1975)
Dolomite Series	Transvaal Basin	25	-0.6	Schidlowski et al. (1975)
Dolomite Series	Transvaal Basin	25	-1.2	Schidlowski et al. (1975)
Dolomite Series	Transvaal Basin	25	-1	Schidlowski et al. (1975)
Dolomite Series	Transvaal Basin	25	-1.3	Schidlowski et al. (1975)
Dolomite Series	Transvaal Basin	25	-0.8	Schidlowski et al. (1975)
Dolomite Series	Transvaal Basin	25	-1	Schidlowski et al. (1975)
Dolomite Series	Transvaal Basin	25	-0.5	Schidlowski et al. (1975)
Dolomite Series	Transvaal Basin	25	-0.6	Schidlowski et al. (1975)
Dolomite Series	Transvaal Basin	25	-0.9	Schidlowski et al. (1975)
Dolomite Series	Transvaal Basin	25	-1	Schidlowski et al. (1975)
Dolomite Series	Transvaal Basin	25	-0.9	Schidlowski et al. (1975)
Dolomite Series	Transvaal Basin	25	0.3	Schidlowski et al. (1975)
Dolomite Series	Transvaal Basin	25	-0.8	Schidlowski et al. (1975)
Dolomite Series	Transvaal Basin	25	-1.1	Schidlowski et al. (1975)
Dolomite Series	Transvaal Basin	25	-1.2	Schidlowski et al. (1975)
Dolomite Series	Transvaal Basin	25	-1.1	Schidlowski et al. (1975)
Dolomite Series	Transvaal Basin	25	-0.3	Schidlowski et al. (1975)
Dolomite Series	Transvaal Basin	25	-0.3	Schidlowski et al. (1975)
Dolomite Series	Transvaal Basin	25	-0.7	Schidlowski et al. (1975)
Dolomite Series	Transvaal Basin	25	-0.6	Schidlowski et al. (1975)
Dolomite Series	Transvaal Basin	25	-0.2	Schidlowski et al. (1975)
Dolomite Series	Transvaal Basin	25	-0.7	Schidlowski et al. (1975)
Dolomite Series	Transvaal Basin	25	-0.5	Schidlowski et al. (1975)
Dolomite Series	Transvaal Basin	25	-0.8	Schidlowski et al. (1975)
Dolomite Series	Transvaal Basin	25	-1.6	Schidlowski et al. (1975)
Dolomite Series	Transvaal Basin	25	-0.2	Schidlowski et al. (1975)
Dolomite Series	Transvaal Basin	25	-0.8	Schidlowski et al. (1975)
Transvaal Supergroup	Transvaal Basin	24	-1.1	Eichmann & Schidlowski (1975)
Transvaal Supergroup	Transvaal Basin	24	-0.8	Eichmann & Schidlowski (1975)
Transvaal Supergroup	Transvaal Basin	24	0.3	Eichmann & Schidlowski (1975)
Transvaal Supergroup	Transvaal Basin	24	-0.9	Eichmann & Schidlowski (1975)
Transvaal Supergroup	Transvaal Basin	24	-0.8	Eichmann & Schidlowski (1975)
Transvaal Supergroup	Transvaal Basin	24	-0.5	Eichmann & Schidlowski (1975)
Transvaal Supergroup	Transvaal Basin	24	0.2	Eichmann & Schidlowski (1975)
Transvaal Supergroup	Transvaal Basin	24	-1	Eichmann & Schidlowski (1975)
Transvaal Supergroup	Transvaal Basin	24	-0.2	Eichmann & Schidlowski (1975)
Transvaal Supergroup	Transvaal Basin	24	0.2	Eichmann & Schidlowski (1975)
Transvaal Supergroup	Transvaal Basin	24	-0.7	Eichmann & Schidlowski (1975)
Transvaal Supergroup	Transvaal Basin	24	-0.9	Eichmann & Schidlowski (1975)
Tongwane Fm	Transvaal Basin	24	2.3	Warke et al. (2018)
Tongwane Fm	Transvaal Basin	24	1.8	Warke et al. (2018)
Tongwane Fm	Transvaal Basin	24	-6.9	Warke et al. (2018)
Tongwane Fm	Transvaal Basin	24	-2.6	Warke et al. (2018)
Tongwane Fm	Transvaal Basin	24	3	Warke et al. (2018)
Tongwane Fm	Transvaal Basin	24	2.5	Warke et al. (2018)
Tongwane Fm	Transvaal Basin	24	2.9	Warke et al. (2018)
Tongwane Fm	Transvaal Basin	24	2.2	Warke et al. (2018)
Tongwane Fm	Transvaal Basin	24	-2.3	Warke et al. (2018)
Tongwane Fm	Transvaal Basin	24	-15.4	Warke et al. (2018)
Tongwane Fm	Transvaal Basin	24	-13.9	Warke et al. (2018)
Tongwane Fm	Transvaal Basin	24	-11.4	Warke et al. (2018)
Tongwane Fm	Transvaal Basin	24	-1.9	Warke et al. (2018)
Tongwane Fm	Transvaal Basin	24	-8.3	Warke et al. (2018)
Tongwane Fm	Transvaal Basin	24	-9.5	Warke et al. (2018)
Tongwane Fm	Transvaal Basin	24	2.9	Bekker et al. (2001)
Tongwane Fm	Transvaal Basin	24	2.8	Bekker et al. (2001)
Tongwane Fm	Transvaal Basin	24	1.9	Bekker et al. (2001)
Tongwane Fm	Transvaal Basin	24	3.5	Bekker et al. (2001)
Tongwane Fm	Transvaal Basin	24	3	Bekker et al. (2001)
Mooidraai Dolomite (lower part)	Transvaal Basin	24	0.64	Bau et al. (1999)
Mooidraai Dolomite (lower part)	Transvaal Basin	24	0.52	Bau et al. (1999)
Mooidraai Dolomite (lower part)	Transvaal Basin	24	0.51	Bau et al. (1999)
Mooidraai Dolomite (lower part)	Transvaal Basin	24	0.54	Bau et al. (1999)
Mooidraai Dolomite (lower part)	Transvaal Basin	24	0.6	Bau et al. (1999)
Mooidraai Dolomite (lower part)	Transvaal Basin	24	0.57	Bau et al. (1999)
Mooidraai Dolomite (lower part)	Transvaal Basin	24	0.63	Bau et al. (1999)
Mooidraai Dolomite (lower part)	Transvaal Basin	24	0.6	Bau et al. (1999)
Mooidraai Dolomite (lower part)	Transvaal Basin	24	0.57	Bau et al. (1999)
Mooidraai Dolomite (lower part)	Transvaal Basin	24	0.64	Bau et al. (1999)
Mooidraai Fm (lower part)	Transvaal Basin	24	-1.4	Guo et al. (2009)
Mooidraai Fm (lower part)	Transvaal Basin	24	-1.1	Guo et al. (2009)
Mooidraai Fm (lower part)	Transvaal Basin	24	0.2	Guo et al. (2009)
Mooidraai Fm (upper part)	Transvaal Basin	24	0.5	Guo et al. (2009)
Mooidraai Fm (upper part)	Transvaal Basin	24	-0.1	Guo et al. (2009)
Lower Duitschland Fm	Transvaal Basin	24	-1.7	Guo et al. (2009)
Lower Duitschland Fm	Transvaal Basin	24	1.9	Guo et al. (2009)
Lower Duitschland Fm	Transvaal Basin	24	0.01	Guo et al. (2009)
Lower Duitschland Fm	Transvaal Basin	24	-1.4	Guo et al. (2009)
Lower Duitschland Fm	Transvaal Basin	24	-1.4	Guo et al. (2009)
Lower Duitschland Fm	Transvaal Basin	24	-1.71	Guo et al. (2009)
Lower Duitschland Fm	Transvaal Basin	24	-0.2	Warke (2016)
Lower Duitschland Fm	Transvaal Basin	24	-0.7	Warke (2016)
Lower Duitschland Fm	Transvaal Basin	24	-0.8	Warke (2016)
Lower Duitschland Fm	Transvaal Basin	24	-1	Warke (2016)
Lower Duitschland Fm	Transvaal Basin	24	-6	Warke (2016)
Lower Duitschland Fm	Transvaal Basin	24	-4.4	Warke (2016)
Lower Duitschland Fm	Transvaal Basin	24	-2.5	Warke (2016)
Lower Duitschland Fm	Transvaal Basin	24	-3.4	Warke (2016)
Lower Duitschland Fm	Transvaal Basin	24	-0.4	Warke (2016)
Lower Duitschland Fm	Transvaal Basin	24	-0.5	Warke (2016)
Lower Duitschland Fm	Transvaal Basin	24	-1.8	Warke (2016)
Lower Duitschland Fm	Transvaal Basin	24	-6	Warke (2016)
Lower Duitschland Fm	Transvaal Basin	24	-4.4	Warke (2016)
Lower Duitschland Fm	Transvaal Basin	24	-1.2	Warke (2016)
Lower Duitschland Fm	Transvaal Basin	24	-1.5	Warke (2016)
Lower Duitschland Fm	Transvaal Basin	24	-0.9	Warke (2016)
Lower Duitschland Fm	Transvaal Basin	24	-0.3	Warke (2016)
Lower Duitschland Fm	Transvaal Basin	24	-4	Warke (2016)
Lower Duitschland Fm	Transvaal Basin	24	-1.1	Warke (2016)
Lower Duitschland Fm	Transvaal Basin	24	-6.2	Warke (2016)
Lower Duitschland Fm	Transvaal Basin	24	-4.5	Warke (2016)
Lower Duitschland Fm	Transvaal Basin	24	-0.7	Warke (2016)
Lower Duitschland Fm	Transvaal Basin	24	-0.28	Frauenstein et al. (2009)
Lower Duitschland Fm	Transvaal Basin	24	-1.33	Frauenstein et al. (2009)
Lower Duitschland Fm	Transvaal Basin	24	-0.67	Frauenstein et al. (2009)
Lower Duitschland Fm	Transvaal Basin	24	-4.9	Frauenstein et al. (2009)
Lower Duitschland Fm	Transvaal Basin	24	-1.19	Frauenstein et al. (2009)
Lower Duitschland Fm	Transvaal Basin	24	-0.92	Frauenstein et al. (2009)
Lower Duitschland Fm	Transvaal Basin	24	-2.41	Frauenstein et al. (2009)
Lower Duitschland Fm	Transvaal Basin	24	-0.97	Frauenstein et al. (2009)
Lower Duitschland Fm	Transvaal Basin	24	-4.88	Frauenstein et al. (2009)
Lower Duitschland Fm	Transvaal Basin	24	-6.26	Frauenstein et al. (2009)
Lower Duitschland Fm	Transvaal Basin	24	-6.35	Frauenstein et al. (2009)
Lower Duitschland Fm	Transvaal Basin	24	-4.42	Frauenstein et al. (2009)
Lower Duitschland Fm	Transvaal Basin	24	-1.3	Bekker et al. (2001)
Lower Duitschland Fm	Transvaal Basin	24	-1.8	Bekker et al. (2001)
Lower Duitschland Fm	Transvaal Basin	24	-3.1	Bekker et al. (2001)
Lower Duitschland Fm	Transvaal Basin	24	-1.4	Bekker et al. (2001)
Lower Duitschland Fm	Transvaal Basin	24	-1.6	Bekker et al. (2001)
Lower Duitschland Fm	Transvaal Basin	24	-2	Bekker et al. (2001)
Lower Duitschland Fm	Transvaal Basin	24	-1.8	Bekker et al. (2001)
Lower Duitschland Fm	Transvaal Basin	24	-3	Bekker et al. (2001)
Lower Duitschland Fm	Transvaal Basin	24	0.1	Bekker et al. (2001)
Lower Duitschland Fm	Transvaal Basin	24	-2.7	Bekker et al. (2001)
Lower Duitschland Fm	Transvaal Basin	24	-1.8	Bekker et al. (2001)
Lower Duitschland Fm	Transvaal Basin	24	-2.4	Bekker et al. (2001)
Lower Duitschland Fm	Transvaal Basin	24	-3.7	Bekker et al. (2001)
Dashiling Fm (Nandaxian Mbr)	Wutai Mtn area-Shanxi Prov.	24	1.65	Zhong & Ma (1997)
Dashiling Fm (Nandaxian Mbr)	Wutai Mtn area-Shanxi Prov.	24	1.33	Zhong & Ma (1997)
Dashiling Fm (Nandaxian Mbr)	Wutai Mtn area-Shanxi Prov.	24	1.24	Zhong & Ma (1997)
Dashiling Fm (Nandaxian Mbr)	Wutai Mtn area-Shanxi Prov.	24	1.67	Zhong & Ma (1997)
Dashiling Fm (Nandaxian Mbr)	Wutai Mtn area-Shanxi Prov.	24	1.44	Zhong & Ma (1997)
Dashiling Fm (Nandaxian Mbr)	Wutai Mtn area-Shanxi Prov.	24	1.47	Zhong & Ma (1997)
Dashiling Fm (Nandaxian Mbr)	Wutai Mtn area-Shanxi Prov.	24	1.68	Zhong & Ma (1997)
Dashiling Fm (Nandaxian Mbr)	Wutai Mtn area-Shanxi Prov.	24	1.67	Zhong & Ma (1997)
Dashiling Fm (Nandaxian Mbr)	Wutai Mtn area-Shanxi Prov.	24	2.02	Zhong & Ma (1997)
Dashiling Fm (Nandaxian Mbr)	Wutai Mtn area-Shanxi Prov.	24	1.68	Zhong & Ma (1997)
Dashiling Fm (Nandaxian Mbr)	Wutai Mtn area-Shanxi Prov.	24	1.46	Zhong & Ma (1997)
Dashiling Fm (Nandaxian Mbr)	Wutai Mtn area-Shanxi Prov.	24	1.74	Zhong & Ma (1997)
Dashiling Fm (Nandaxian Mbr)	Wutai Mtn area-Shanxi Prov.	24	1.34	Zhong & Ma (1997)
Dashiling Fm (Nandaxian Mbr)	Wutai Mtn area-Shanxi Prov.	24	2.25	Zhong & Ma (1997)
Dashiling Fm (Nandaxian Mbr)	Wutai Mtn area-Shanxi Prov.	24	2.61	Zhong & Ma (1997)
Dashiling Fm (Nandaxian Mbr)	Wutai Mtn area-Shanxi Prov.	24	3.08	Zhong & Ma (1997)
Dashiling Fm (Nandaxian Mbr)	Wutai Mtn area-Shanxi Prov.	24	2.44	Zhong & Ma (1997)
Dashiling Fm (Nandaxian Mbr)	Wutai Mtn area-Shanxi Prov.	24	2.39	Zhong & Ma (1997)
Dashiling Fm (Nandaxian Mbr)	Wutai Mtn area-Shanxi Prov.	24	2.68	Zhong & Ma (1997)
Dashiling Fm (Nandaxian Mbr)	Wutai Mtn area-Shanxi Prov.	24	2.29	Zhong & Ma (1997)
Dashiling Fm (Nandaxian Mbr)	Wutai Mtn area-Shanxi Prov.	24	2.52	Zhong & Ma (1997)
Dashiling Fm (Nandaxian Mbr)	Wutai Mtn area-Shanxi Prov.	24	3.08	Zhong & Ma (1997)
Dashiling Fm (Nandaxian Mbr)	Wutai Mtn area-Shanxi Prov.	24	3.12	Zhong & Ma (1997)
Dashiling Fm (Nandaxian Mbr)	Wutai Mtn area-Shanxi Prov.	24	3.12	Zhong & Ma (1997)
Dashiling Fm (Nandaxian Mbr)	Wutai Mtn area-Shanxi Prov.	24	1.76	Zhong & Ma (1997)
Dashiling Fm (Nandaxian Mbr)	Wutai Mtn area-Shanxi Prov.	24	2.72	Zhong & Ma (1997)
Dashiling Fm (Nandaxian Mbr)	Wutai Mtn area-Shanxi Prov.	24	2.69	Zhong & Ma (1997)
Dashiling Fm (Nandaxian Mbr)	Wutai Mtn area-Shanxi Prov.	24	2.65	Zhong & Ma (1997)
Dashiling Fm (Nandaxian Mbr)	Wutai Mtn area-Shanxi Prov.	24	2.81	Zhong & Ma (1997)
Dashiling Fm (Nandaxian Mbr)	Wutai Mtn area-Shanxi Prov.	24	2.89	Zhong & Ma (1997)
Dashiling Fm (Nandaxian Mbr)	Wutai Mtn area-Shanxi Prov.	24	2.61	Zhong & Ma (1997)
Dashiling Fm (Nandaxian Mbr)	Wutai Mtn area-Shanxi Prov.	24	2.81	Zhong & Ma (1997)
Dashiling Fm (Nandaxian Mbr)	Wutai Mtn area-Shanxi Prov.	24	3.52	Zhong & Ma (1997)
Dashiling Fm (Nandaxian Mbr)	Wutai Mtn area-Shanxi Prov.	24	1.76	Zhong & Ma (1997)
Dashiling Fm (Nandaxian Mbr)	Wutai Mtn area-Shanxi Prov.	24	2.89	Zhong & Ma (1997)
Dashiling Fm (Nandaxian Mbr)	Wutai Mtn area-Shanxi Prov.	24	2.68	Zhong & Ma (1997)
Dashiling Fm (Nandaxian Mbr)	Wutai Mtn area-Shanxi Prov.	24	2.7	Zhong & Ma (1997)
Dashiling Fm (Nandaxian Mbr)	Wutai Mtn area-Shanxi Prov.	24	2.35	Zhong & Ma (1997)
Dashiling Fm (Nandaxian Mbr)	Wutai Mtn area-Shanxi Prov.	24	2.54	Zhong & Ma (1997)
Dashiling Fm (Nandaxian Mbr)	Wutai Mtn area-Shanxi Prov.	24	2.44	Zhong & Ma (1997)
Dashiling Fm (Nandaxian Mbr)	Wutai Mtn area-Shanxi Prov.	24	1.04	Zhong & Ma (1997)
Dashiling Fm (Nandaxian Mbr)	Wutai Mtn area-Shanxi Prov.	24	1.74	Zhong & Ma (1997)
Dashiling Fm (Nandaxian Mbr)	Wutai Mtn area-Shanxi Prov.	24	1.42	Zhong & Ma (1997)
Dashiling Fm (Nandaxian Mbr)	Wutai Mtn area-Shanxi Prov.	24	2.07	Zhong & Ma (1997)
Dashiling Fm (Nandaxian Mbr)	Wutai Mtn area-Shanxi Prov.	24	1.96	Zhong & Ma (1997)
Dashiling Fm (Nandaxian Mbr)	Wutai Mtn area-Shanxi Prov.	24	2.07	Zhong & Ma (1997)
Dashiling Fm (Nandaxian Mbr)	Wutai Mtn area-Shanxi Prov.	24	2.15	Zhong & Ma (1997)
Dashiling Fm (Nandaxian Mbr)	Wutai Mtn area-Shanxi Prov.	24	1.84	Zhong & Ma (1997)
Dashiling Fm (Nandaxian Mbr)	Wutai Mtn area-Shanxi Prov.	24	1.4	Zhong & Ma (1997)
Dashiling Fm (Nandaxian Mbr)	Wutai Mtn area-Shanxi Prov.	24	1.55	Zhong & Ma (1997)
Dashiling Fm (Nandaxian Mbr)	Wutai Mtn area-Shanxi Prov.	24	1.55	Zhong & Ma (1997)
Dashiling Fm (Nandaxian Mbr)	Wutai Mtn area-Shanxi Prov.	24	1.56	Zhong & Ma (1997)
Dashiling Fm (Nandaxian Mbr)	Wutai Mtn area-Shanxi Prov.	24	1.59	Zhong & Ma (1997)
Dashiling Fm (Nandaxian Mbr)	Wutai Mtn area-Shanxi Prov.	24	1.74	Zhong & Ma (1997)
Dashiling Fm (Nandaxian Mbr)	Wutai Mtn area-Shanxi Prov.	24	1.36	Zhong & Ma (1997)
Dashiling Fm (Nandaxian Mbr)	Wutai Mtn area-Shanxi Prov.	24	2.27	Zhong & Ma (1997)
Dashiling Fm (Nandaxian Mbr)	Wutai Mtn area-Shanxi Prov.	24	1.39	Zhong & Ma (1997)
Dashiling Fm (Nandaxian Mbr)	Wutai Mtn area-Shanxi Prov.	24	1.61	Zhong & Ma (1997)
Dashiling Fm (Nandaxian Mbr)	Wutai Mtn area-Shanxi Prov.	24	1.56	Zhong & Ma (1997)
Dashiling Fm (Nandaxian Mbr)	Wutai Mtn area-Shanxi Prov.	24	1.9	Zhong & Ma (1997)
Dashiling Fm (Nandaxian Mbr)	Wutai Mtn area-Shanxi Prov.	24	1.53	Zhong & Ma (1997)
Dashiling Fm (Nandaxian Mbr)	Wutai Mtn area-Shanxi Prov.	24	1.46	Zhong & Ma (1997)
Dashiling Fm (Nandaxian Mbr)	Wutai Mtn area-Shanxi Prov.	24	1.54	Zhong & Ma (1997)
Dashiling Fm (Nandaxian Mbr)	Wutai Mtn area-Shanxi Prov.	24	1.03	Zhong & Ma (1997)
Dashiling Fm (Nandaxian Mbr)	Wutai Mtn area-Shanxi Prov.	24	1.2	Zhong & Ma (1997)
Dashiling Fm (Nandaxian Mbr)	Wutai Mtn area-Shanxi Prov.	24	2.17	Zhong & Ma (1997)
Dashiling Fm (Nandaxian Mbr)	Wutai Mtn area-Shanxi Prov.	24	1.44	Zhong & Ma (1997)
Dashiling Fm (Nandaxian Mbr)	Wutai Mtn area-Shanxi Prov.	24	1.65	Zhong & Ma (1997)
Dashiling Fm (Nandaxian Mbr)	Wutai Mtn area-Shanxi Prov.	24	1.32	Zhong & Ma (1997)
Dashiling Fm (Nandaxian Mbr)	Wutai Mtn area-Shanxi Prov.	24	1.53	Zhong & Ma (1997)
Dashiling Fm (Nandaxian Mbr)	Wutai Mtn area-Shanxi Prov.	24	0.61	Zhong & Ma (1997)
Dashiling Fm (Nandaxian Mbr)	Wutai Mtn area-Shanxi Prov.	24	1.66	Zhong & Ma (1997)
Dashiling Fm (Nandaxian Mbr)	Wutai Mtn area-Shanxi Prov.	24	1.46	Zhong & Ma (1997)
Dashiling Fm (Nandaxian Mbr)	Wutai Mtn area-Shanxi Prov.	24	1.26	Zhong & Ma (1997)
Dashiling Fm (Nandaxian Mbr)	Wutai Mtn area-Shanxi Prov.	24	1.71	Zhong & Ma (1997)
Dashiling Fm (Nandaxian Mbr)	Wutai Mtn area-Shanxi Prov.	24	1.76	Zhong & Ma (1997)
Dashiling Fm (Nandaxian Mbr)	Wutai Mtn area-Shanxi Prov.	24	1.46	Zhong & Ma (1997)
Dashiling Fm (Nandaxian Mbr)	Wutai Mtn area-Shanxi Prov.	24	1.45	Zhong & Ma (1997)
Dashiling Fm (Nandaxian Mbr)	Wutai Mtn area-Shanxi Prov.	24	1.82	Zhong & Ma (1997)
Dashiling Fm (Nandaxian Mbr)	Wutai Mtn area-Shanxi Prov.	24	1.67	Zhong & Ma (1997)
Dashiling Fm (Nandaxian Mbr)	Wutai Mtn area-Shanxi Prov.	24	2.14	Zhong & Ma (1997)
Dashiling Fm (Nandaxian Mbr)	Wutai Mtn area-Shanxi Prov.	24	1.99	Zhong & Ma (1997)
Dashiling Fm (Nandaxian Mbr)	Wutai Mtn area-Shanxi Prov.	24	2.02	Zhong & Ma (1997)
Dashiling Fm (Nandaxian Mbr)	Wutai Mtn area-Shanxi Prov.	24	2.6	Zhong & Ma (1997)
Dashiling Fm (Nandaxian Mbr)	Wutai Mtn area-Shanxi Prov.	24	2.41	Zhong & Ma (1997)
Dashiling Fm (Nandaxian Mbr)	Wutai Mtn area-Shanxi Prov.	24	1.97	Zhong & Ma (1997)
Dashiling Fm (Nandaxian Mbr)	Wutai Mtn area-Shanxi Prov.	24	1.92	Zhong & Ma (1997)
Dashiling Fm (Nandaxian Mbr)	Wutai Mtn area-Shanxi Prov.	24	1.75	Zhong & Ma (1997)
Dashiling Fm (Nandaxian Mbr)	Wutai Mtn area-Shanxi Prov.	24	1.55	Zhong & Ma (1997)
Dashiling Fm (Nandaxian Mbr)	Wutai Mtn area-Shanxi Prov.	24	1.01	Zhong & Ma (1997)
Dashiling Fm (Nandaxian Mbr)	Wutai Mtn area-Shanxi Prov.	24	1.63	Zhong & Ma (1997)
Dashiling Fm (Nandaxian Mbr)	Wutai Mtn area-Shanxi Prov.	24	1.7	Zhong & Ma (1997)
Dashiling Fm (Nandaxian Mbr)	Wutai Mtn area-Shanxi Prov.	24	0.75	Zhong & Ma (1997)
Dashiling Fm (Nandaxian Mbr)	Wutai Mtn area-Shanxi Prov.	24	1.68	Zhong & Ma (1997)
Dashiling Fm (Nandaxian Mbr)	Wutai Mtn area-Shanxi Prov.	24	1.27	Zhong & Ma (1997)
Dashiling Fm (Nandaxian Mbr)	Wutai Mtn area-Shanxi Prov.	24	1.01	Zhong & Ma (1997)
Dashiling Fm (Nandaxian Mbr)	Wutai Mtn area-Shanxi Prov.	24	1.92	Zhong & Ma (1997)
Dashiling Fm (Nandaxian Mbr)	Wutai Mtn area-Shanxi Prov.	24	1.7	Zhong & Ma (1997)
Dashiling Fm (Nandaxian Mbr)	Wutai Mtn area-Shanxi Prov.	24	2.19	Zhong & Ma (1997)
Dashiling Fm (Nandaxian Mbr)	Wutai Mtn area-Shanxi Prov.	24	1.47	Zhong & Ma (1997)
Dashiling Fm (Nandaxian Mbr)	Wutai Mtn area-Shanxi Prov.	24	1.47	Zhong & Ma (1997)
Dashiling Fm (Nandaxian Mbr)	Wutai Mtn area-Shanxi Prov.	24	2.32	Zhong & Ma (1997)
Dashiling Fm (Nandaxian Mbr)	Wutai Mtn area-Shanxi Prov.	24	1.38	Zhong & Ma (1997)
Dashiling Fm (Nandaxian Mbr)	Wutai Mtn area-Shanxi Prov.	24	1.81	Zhong & Ma (1997)
Dashiling Fm (Nandaxian Mbr)	Wutai Mtn area-Shanxi Prov.	24	1.91	Zhong & Ma (1997)
Dashiling Fm (Nandaxian Mbr)	Wutai Mtn area-Shanxi Prov.	24	1.44	Zhong & Ma (1997)
Dashiling Fm (Nandaxian Mbr)	Wutai Mtn area-Shanxi Prov.	24	1.47	Zhong & Ma (1997)
Dashiling Fm (Nandaxian Mbr)	Wutai Mtn area-Shanxi Prov.	24	1.71	Zhong & Ma (1997)
Dashiling Fm (Nandaxian Mbr)	Wutai Mtn area-Shanxi Prov.	24	1.94	Zhong & Ma (1997)
Dashiling Fm (Nandaxian Mbr)	Wutai Mtn area-Shanxi Prov.	24	1.89	Zhong & Ma (1997)
Upper Duitschland Fm	Transvaal Basin	23	8.4	Buick et al. (1998)
Upper Duitschland Fm	Transvaal Basin	23	8.5	Buick et al. (1998)
Upper Duitschland Fm	Transvaal Basin	23	9.1	Buick et al. (1998)
Upper Duitschland Fm	Transvaal Basin	23	8.5	Buick et al. (1998)
Upper Duitschland Fm	Transvaal Basin	23	6.9	Buick et al. (1998)
Upper Duitschland Fm	Transvaal Basin	23	5.8	Buick et al. (1998)
Upper Duitschland Fm	Transvaal Basin	23	6.7	Buick et al. (1998)
Upper Duitschland Fm	Transvaal Basin	23	6.8	Buick et al. (1998)
Upper Duitschland Fm	Transvaal Basin	23	7.1	Buick et al. (1998)
Upper Duitschland Fm	Transvaal Basin	23	6.9	Buick et al. (1998)
Upper Duitschland Fm	Transvaal Basin	23	8.2	Buick et al. (1998)
Upper Duitschland Fm	Transvaal Basin	23	9.3	Buick et al. (1998)
Upper Duitschland Fm	Transvaal Basin	23	7.5	Buick et al. (1998)
Upper Duitschland Fm	Transvaal Basin	23	7.4	Buick et al. (1998)
Upper Duitschland Fm	Transvaal Basin	23	6.4	Buick et al. (1998)
Upper Duitschland Fm	Transvaal Basin	23	6.5	Buick et al. (1998)
Upper Duitschland Fm	Transvaal Basin	23	5	Buick et al. (1998)
Upper Duitschland Fm	Transvaal Basin	23	6.3	Buick et al. (1998)
Upper Duitschland Fm	Transvaal Basin	23	3.6	Buick et al. (1998)
Upper Duitschland Fm	Transvaal Basin	23	4.8	Buick et al. (1998)
Upper Duitschland Fm	Transvaal Basin	23	5	Buick et al. (1998)
Upper Duitschland Fm	Transvaal Basin	23	4.7	Buick et al. (1998)
Upper Duitschland Fm	Transvaal Basin	23	5.8	Buick et al. (1998)
Upper Duitschland Fm	Transvaal Basin	23	5.5	Buick et al. (1998)
Upper Duitschland Fm	Transvaal Basin	23	5.2	Buick et al. (1998)
Upper Duitschland Fm	Transvaal Basin	23	4.2	Buick et al. (1998)
Upper Duitschland Fm	Transvaal Basin	23	6.3	Buick et al. (1998)
Upper Duitschland Fm	Transvaal Basin	23	5.3	Buick et al. (1998)
Upper Duitschland Fm	Transvaal Basin	23	6	Buick et al. (1998)
Upper Duitschland Fm	Transvaal Basin	23	6.8	Buick et al. (1998)
Upper Duitschland Fm	Transvaal Basin	23	6.1	Buick et al. (1998)
Upper Duitschland Fm	Transvaal Basin	23	5.8	Buick et al. (1998)
Upper Duitschland Fm	Transvaal Basin	23	5.8	Buick et al. (1998)
Upper Duitschland Fm	Transvaal Basin	23	6	Bekker et al. (2001)
Upper Duitschland Fm	Transvaal Basin	23	6	Bekker et al. (2001)
Upper Duitschland Fm	Transvaal Basin	23	5.2	Bekker et al. (2001)
Upper Duitschland Fm	Transvaal Basin	23	4.4	Bekker et al. (2001)
Upper Duitschland Fm	Transvaal Basin	23	8.1	Bekker et al. (2001)
Upper Duitschland Fm	Transvaal Basin	23	7.9	Bekker et al. (2001)
Upper Duitschland Fm	Transvaal Basin	23	5.5	Bekker et al. (2001)
Upper Duitschland Fm	Transvaal Basin	23	5.6	Bekker et al. (2001)
Upper Duitschland Fm	Transvaal Basin	23	2.3	Bekker et al. (2001)
Upper Duitschland Fm	Transvaal Basin	23	2.3	Bekker et al. (2001)
Upper Duitschland Fm	Transvaal Basin	23	6.8	Bekker et al. (2001)
Upper Duitschland Fm	Transvaal Basin	23	7.9	Bekker et al. (2001)
Upper Duitschland Fm	Transvaal Basin	23	6	Bekker et al. (2001)
Upper Duitschland Fm	Transvaal Basin	23	6	Bekker et al. (2001)
Upper Duitschland Fm	Transvaal Basin	23	6.1	Bekker et al. (2001)
Upper Duitschland Fm	Transvaal Basin	23	8.7	Bekker et al. (2001)
Upper Duitschland Fm	Transvaal Basin	23	9.5	Bekker et al. (2001)
Upper Duitschland Fm	Transvaal Basin	23	10.1	Bekker et al. (2001)
Upper Duitschland Fm	Transvaal Basin	23	8.9	Bekker et al. (2001)
Upper Duitschland Fm	Transvaal Basin	23	9.4	Bekker et al. (2001)
Upper Duitschland Fm	Transvaal Basin	23	8.1	Bekker et al. (2001)
Upper Duitschland Fm	Transvaal Basin	23	2.4	Bekker et al. (2001)
Upper Duitschland Fm	Transvaal Basin	23	-2	Bekker et al. (2001)
Upper Duitschland Fm	Transvaal Basin	23	2	Bekker et al. (2001)
Upper Duitschland Fm	Transvaal Basin	23	6.5	Guo et al. (2009)
Upper Duitschland Fm	Transvaal Basin	23	6.1	Guo et al. (2009)
Upper Duitschland Fm	Transvaal Basin	23	7.8	Guo et al. (2009)
Upper Duitschland Fm	Transvaal Basin	23	6.5	Guo et al. (2009)
Upper Duitschland Fm	Transvaal Basin	23	1.6	Guo et al. (2009)
Upper Duitschland Fm	Transvaal Basin	23	6.8	Guo et al. (2009)
Upper Duitschland Fm	Transvaal Basin	23	5.7	Guo et al. (2009)
Upper Duitschland Fm	Transvaal Basin	23	6.7	Guo et al. (2009)
Upper Duitschland Fm	Transvaal Basin	23	2.5	Guo et al. (2009)
Upper Duitschland Fm	Transvaal Basin	23	3.8	Guo et al. (2009)
Upper Duitschland Fm	Transvaal Basin	23	6	Guo et al. (2009)
Upper Duitschland Fm	Transvaal Basin	23	6.14	Guo et al. (2009)
Upper Duitschland Fm	Transvaal Basin	23	2.4	Guo et al. (2009)
Upper Duitschland Fm	Transvaal Basin	23	5.31	Guo et al. (2009)
Upper Duitschland Fm	Transvaal Basin	23	2.6	Guo et al. (2009)
Upper Duitschland Fm	Transvaal Basin	23	2.21	Frauenstein et al. (2009)
Upper Duitschland Fm	Transvaal Basin	23	2.33	Frauenstein et al. (2009)
Upper Duitschland Fm	Transvaal Basin	23	2.41	Frauenstein et al. (2009)
Upper Duitschland Fm	Transvaal Basin	23	2.46	Frauenstein et al. (2009)
Upper Duitschland Fm	Transvaal Basin	23	2.55	Frauenstein et al. (2009)
Upper Duitschland Fm	Transvaal Basin	23	2.87	Frauenstein et al. (2009)
Upper Duitschland Fm	Transvaal Basin	23	3.94	Frauenstein et al. (2009)
Upper Duitschland Fm	Transvaal Basin	23	5.62	Frauenstein et al. (2009)
Upper Duitschland Fm	Transvaal Basin	23	0.94	Frauenstein et al. (2009)
Upper Duitschland Fm	Transvaal Basin	23	7.7	Frauenstein et al. (2009)
Upper Duitschland Fm	Transvaal Basin	23	2.57	Frauenstein et al. (2009)
Upper Duitschland Fm	Transvaal Basin	23	2.43	Frauenstein et al. (2009)
Upper Duitschland Fm	Transvaal Basin	23	2.38	Frauenstein et al. (2009)
Upper Duitschland Fm	Transvaal Basin	23	2.56	Frauenstein et al. (2009)
Upper Duitschland Fm	Transvaal Basin	23	7.54	Frauenstein et al. (2009)
Upper Duitschland Fm	Transvaal Basin	23	8.01	Frauenstein et al. (2009)
Upper Duitschland Fm	Transvaal Basin	23	8.13	Frauenstein et al. (2009)
Upper Duitschland Fm	Transvaal Basin	23	4.57	Frauenstein et al. (2009)
Upper Duitschland Fm	Transvaal Basin	23	3.27	Frauenstein et al. (2009)
Upper Duitschland Fm	Transvaal Basin	23	7.98	Frauenstein et al. (2009)
Upper Duitschland Fm	Transvaal Basin	23	6.18	Frauenstein et al. (2009)
Upper Duitschland Fm	Transvaal Basin	23	5.99	Frauenstein et al. (2009)
Upper Duitschland Fm	Transvaal Basin	23	5.87	Frauenstein et al. (2009)
Upper Duitschland Fm	Transvaal Basin	23	5.76	Frauenstein et al. (2009)
Upper Duitschland Fm	Transvaal Basin	23	5.99	Frauenstein et al. (2009)
Upper Duitschland Fm	Transvaal Basin	23	5.97	Frauenstein et al. (2009)
Upper Duitschland Fm	Transvaal Basin	23	5.25	Frauenstein et al. (2009)
Upper Duitschland Fm	Transvaal Basin	23	6.18	Frauenstein et al. (2009)
Upper Duitschland Fm	Transvaal Basin	23	5.47	Frauenstein et al. (2009)
Upper Duitschland Fm	Transvaal Basin	23	9.47	Frauenstein et al. (2009)
Upper Duitschland Fm	Transvaal Basin	23	6.08	Frauenstein et al. (2009)
Upper Duitschland Fm	Transvaal Basin	23	7.21	Frauenstein et al. (2009)
Upper Duitschland Fm	Transvaal Basin	23	7.65	Frauenstein et al. (2009)
Upper Duitschland Fm	Transvaal Basin	23	0.95	Frauenstein et al. (2009)
Upper Duitschland Fm	Transvaal Basin	23	-2.16	Frauenstein et al. (2009)
Upper Duitschland Fm	Transvaal Basin	23	6.87	Frauenstein et al. (2009)
Upper Duitschland Fm	Transvaal Basin	23	2.27	Frauenstein et al. (2009)
Upper Duitschland Fm	Transvaal Basin	23	1.39	Frauenstein et al. (2009)
Upper Duitschland Fm	Transvaal Basin	23	1.49	Frauenstein et al. (2009)
Upper Duitschland Fm	Transvaal Basin	23	-0.77	Frauenstein et al. (2009)
Upper Duitschland Fm	Transvaal Basin	23	9.67	Frauenstein et al. (2009)
Upper Duitschland Fm	Transvaal Basin	23	9.43	Frauenstein et al. (2009)
Upper Duitschland Fm	Transvaal Basin	23	10.16	Frauenstein et al. (2009)
Upper Duitschland Fm	Transvaal Basin	23	9.65	Frauenstein et al. (2009)
Upper Duitschland Fm	Transvaal Basin	23	9.35	Frauenstein et al. (2009)
Upper Duitschland Fm	Transvaal Basin	23	7.14	Frauenstein et al. (2009)
Upper Duitschland Fm	Transvaal Basin	23	1.3	Frauenstein et al. (2009)
Upper Duitschland Fm	Transvaal Basin	23	-1.06	Frauenstein et al. (2009)
Upper Duitschland Fm	Transvaal Basin	23	1.84	Frauenstein et al. (2009)
Upper Duitschland Fm	Transvaal Basin	23	1.8	Frauenstein et al. (2009)
Upper Duitschland Fm	Transvaal Basin	23	2.43	Frauenstein et al. (2009)
Upper Duitschland Fm	Transvaal Basin	23	2.06	Frauenstein et al. (2009)
Upper Duitschland Fm	Transvaal Basin	23	1.92	Frauenstein et al. (2009)
Upper Duitschland Fm	Transvaal Basin	23	2.3	Frauenstein et al. (2009)
Upper Duitschland Fm	Transvaal Basin	23	2.25	Frauenstein et al. (2009)
Upper Duitschland Fm	Transvaal Basin	23	2.2	Frauenstein et al. (2009)
Upper Duitschland Fm	Transvaal Basin	23	2.15	Frauenstein et al. (2009)
Upper Duitschland Fm	Transvaal Basin	23	10.07	Frauenstein et al. (2009)
Upper Duitschland Fm	Transvaal Basin	23	1.43	Frauenstein et al. (2009)
Upper Duitschland Fm	Transvaal Basin	23	9.64	Frauenstein et al. (2009)
Upper Duitschland Fm	Transvaal Basin	23	8.36	Frauenstein et al. (2009)
Bruce Limestone	Elliot Lake, Ontario	23	-1.52	Veizer et al. (1992a)
Bruce Limestone	Elliot Lake, Ontario	23	-1.41	Veizer et al. (1992a)
Bruce Limestone	Elliot Lake, Ontario	23	-1.25	Veizer et al. (1992a)
Bruce Limestone	Elliot Lake, Ontario	23	-1.24	Veizer et al. (1992a)
Bruce Limestone	Elliot Lake, Ontario	23	-1.46	Veizer et al. (1992a)
Bruce Limestone	Elliot Lake, Ontario	23	-1.46	Veizer et al. (1992a)
Bruce Limestone	Elliot Lake, Ontario	23	-1.29	Veizer et al. (1992a)
Bruce Limestone	Elliot Lake, Ontario	23	-1.24	Veizer et al. (1992a)
Bruce Limestone	Elliot Lake, Ontario	23	-1.23	Veizer et al. (1992a)
Bruce Limestone	Elliot Lake, Ontario	23	-1.2	Veizer et al. (1992a)
Bruce Limestone	Elliot Lake, Ontario	23	-1.22	Veizer et al. (1992a)
Bruce Limestone	Elliot Lake, Ontario	23	-1.58	Veizer et al. (1992a)
Bruce Limestone	Elliot Lake, Ontario	23	-1.38	Veizer et al. (1992a)
Bruce Limestone	Elliot Lake, Ontario	23	-1.4	Veizer et al. (1992a)
Bruce Limestone	Elliot Lake, Ontario	23	-1.68	Veizer et al. (1992a)
Bruce Limestone	Elliot Lake, Ontario	23	-1.5	Veizer et al. (1992a)
Bruce Limestone	Elliot Lake, Ontario	23	-1.38	Veizer et al. (1992a)
Bruce Limestone	Elliot Lake, Ontario	23	-1.33	Veizer et al. (1992a)
Bruce Limestone	Elliot Lake, Ontario	23	-1.99	Veizer et al. (1992a)
Bruce Limestone	Elliot Lake, Ontario	23	-0.94	Veizer et al. (1992a)
Bruce Limestone	Elliot Lake, Ontario	23	-0.89	Veizer et al. (1992a)
Bruce Limestone	Elliot Lake, Ontario	23	-1.25	Veizer et al. (1992a)
Bruce Limestone	Elliot Lake, Ontario	23	-1.16	Veizer et al. (1992a)
Bruce Limestone	Elliot Lake, Ontario	23	-1.48	Veizer et al. (1992a)
Bruce Limestone	Elliot Lake, Ontario	23	-1.09	Veizer et al. (1992a)
Bruce Limestone	Elliot Lake, Ontario	23	-0.84	Veizer et al. (1992a)
Bruce Limestone	Elliot Lake, Ontario	23	-1.24	Veizer et al. (1992a)
Bruce Limestone	Elliot Lake, Ontario	23	-1.02	Veizer et al. (1992a)
Bruce Limestone	Elliot Lake, Ontario	23	-0.94	Veizer et al. (1992a)
Bruce Limestone	Elliot Lake, Ontario	23	-0.83	Veizer et al. (1992a)
Bruce Limestone	Elliot Lake, Ontario	23	-0.96	Veizer et al. (1992a)
Bruce Limestone	Elliot Lake, Ontario	23	-1.11	Veizer et al. (1992a)
Bruce Limestone	Elliot Lake, Ontario	23	-0.71	Veizer et al. (1992a)
Bruce Limestone	Elliot Lake, Ontario	23	-1	Veizer et al. (1992a)
Lomagundi Group	Zimbabwe	22	8	Schidlowski et al. (1975)
Lomagundi Group	Zimbabwe	22	-4.9	Schidlowski et al. (1975)
Lomagundi Group	Zimbabwe	22	-4.9	Schidlowski et al. (1975)
Lomagundi Group	Zimbabwe	22	8.6	Schidlowski et al. (1975)
Lomagundi Group	Zimbabwe	22	8	Schidlowski et al. (1975)
Lomagundi Group	Zimbabwe	22	7.3	Schidlowski et al. (1975)
Lomagundi Group	Zimbabwe	22	7.8	Schidlowski et al. (1975)
Lomagundi Group	Zimbabwe	22	2.2	Schidlowski et al. (1975)
Lomagundi Group	Zimbabwe	22	8.1	Schidlowski et al. (1975)
Lomagundi Group	Zimbabwe	22	9.2	Schidlowski et al. (1975)
Lomagundi Group	Zimbabwe	22	12.5	Schidlowski et al. (1975)
Lomagundi Group	Zimbabwe	22	13.4	Schidlowski et al. (1975)
Lomagundi Group	Zimbabwe	22	11.4	Schidlowski et al. (1975)
Lomagundi Group	Zimbabwe	22	12.9	Schidlowski et al. (1975)
Alto Moxotó Terrane (Itatuba)	Borboremba, Brazil	22	8.8	Santos et al. (2013)
Alto Moxotó Terrane (Itatuba)	Borboremba, Brazil	22	7.7	Santos et al. (2013)
Alto Moxotó Terrane (Itatuba)	Borboremba, Brazil	22	5.8	Santos et al. (2013)
Alto Moxotó Terrane (Itatuba)	Borboremba, Brazil	22	5.5	Santos et al. (2013)
Alto Moxotó Terrane (Itatuba)	Borboremba, Brazil	22	7.2	Santos et al. (2013)
Alto Moxotó Terrane (Itatuba)	Borboremba, Brazil	22	7.5	Santos et al. (2013)
Alto Moxotó Terrane (Itatuba)	Borboremba, Brazil	22	6.8	Santos et al. (2013)
Alto Moxotó Terrane (Itatuba)	Borboremba, Brazil	22	6.1	Santos et al. (2013)
Alto Moxotó Terrane (Itatuba)	Borboremba, Brazil	22	5.9	Santos et al. (2013)
Alto Moxotó Terrane (Itatuba)	Borboremba, Brazil	22	4.7	Santos et al. (2013)
Alto Moxotó Terrane (Itatuba)	Borboremba, Brazil	22	4.8	Santos et al. (2013)
Alto Moxotó Terrane (Itatuba)	Borboremba, Brazil	22	5.4	Santos et al. (2013)
Alto Moxotó Terrane (Itatuba)	Borboremba, Brazil	22	6.5	Santos et al. (2013)
Alto Moxotó Terrane (Itatuba)	Borboremba, Brazil	22	6.6	Santos et al. (2013)
Alto Moxotó Terrane (Itatuba)	Borboremba, Brazil	22	-0.8	Santos et al. (2013)
Alto Moxotó Terrane (Itatuba)	Borboremba, Brazil	22	7	Santos et al. (2013)
Alto Moxotó Terrane (Itatuba)	Borboremba, Brazil	22	5.7	Santos et al. (2013)
Alto Moxotó Terrane (Itatuba)	Borboremba, Brazil	22	7.6	Santos et al. (2013)
Alto Moxotó Terrane (Itatuba)	Borboremba, Brazil	22	6.2	Santos et al. (2013)
Alto Moxotó Terrane (Itatuba)	Borboremba, Brazil	22	7.4	Santos et al. (2013)
Alto Moxotó Terrane (Itatuba)	Borboremba, Brazil	22	2.1	Santos et al. (2013)
Alto Moxotó Terrane (Itatuba)	Borboremba, Brazil	22	2.4	Santos et al. (2013)
Alto Moxotó Terrane (Itatuba)	Borboremba, Brazil	22	2.9	Santos et al. (2013)
Alto Moxotó Terrane (Itatuba)	Borboremba, Brazil	22	3.8	Santos et al. (2013)
Alto Moxotó Terrane (Itatuba)	Borboremba, Brazil	22	7.2	Santos et al. (2013)
Alto Moxotó Terrane (Itatuba)	Borboremba, Brazil	22	8	Santos et al. (2013)
Alto Moxotó Terrane (Itatuba)	Borboremba, Brazil	22	5.5	Santos et al. (2013)
Alto Moxotó Terrane (Itatuba)	Borboremba, Brazil	22	5.6	Santos et al. (2013)
Alto Moxotó Terrane (Itatuba)	Borboremba, Brazil	22	4.5	Santos et al. (2013)
Alto Moxotó Terrane (Itatuba)	Borboremba, Brazil	22	2.5	Santos et al. (2013)
Alto Moxotó Terrane (Itatuba)	Borboremba, Brazil	22	4.1	Santos et al. (2013)
Alto Moxotó Terrane (Itatuba)	Borboremba, Brazil	22	1.9	Santos et al. (2013)
Alto Moxotó Terrane (Itatuba)	Borboremba, Brazil	22	6.9	Santos et al. (2013)
Alto Moxotó Terrane (Itatuba)	Borboremba, Brazil	22	1.2	Santos et al. (2013)
Alto Moxotó Terrane (Itatuba)	Borboremba, Brazil	22	6.1	Santos et al. (2013)
Alto Moxotó Terrane (Itatuba)	Borboremba, Brazil	22	5.5	Santos et al. (2013)
Alto Moxotó Terrane (Itatuba)	Borboremba, Brazil	22	5.6	Santos et al. (2013)
Alto Moxotó Terrane (Itatuba)	Borboremba, Brazil	22	5.5	Santos et al. (2013)
Alto Moxotó Terrane (Itatuba)	Borboremba, Brazil	22	6.3	Santos et al. (2013)
Alto Moxotó Terrane (Itatuba)	Borboremba, Brazil	22	6.2	Santos et al. (2013)
Alto Moxotó Terrane (Itatuba)	Borboremba, Brazil	22	4.8	Santos et al. (2013)
Alto Moxotó Terrane (Itatuba)	Borboremba, Brazil	22	4.2	Santos et al. (2013)
Alto Moxotó Terrane (Itatuba)	Borboremba, Brazil	22	6.2	Santos et al. (2013)
Alto Moxotó Terrane (Itatuba)	Borboremba, Brazil	22	5.7	Santos et al. (2013)
Alto Moxotó Terrane (Itatuba)	Borboremba, Brazil	22	6.3	Santos et al. (2013)
Alto Moxotó Terrane (Itatuba)	Borboremba, Brazil	22	6.2	Santos et al. (2013)
Alto Moxotó Terrane (Itatuba)	Borboremba, Brazil	22	4.6	Santos et al. (2013)
Alto Moxotó Terrane (Itatuba)	Borboremba, Brazil	22	3.7	Santos et al. (2013)
Alto Moxotó Terrane (Itatuba)	Borboremba, Brazil	22	4	Santos et al. (2013)
Alto Moxotó Terrane (Itatuba)	Borboremba, Brazil	22	7	Santos et al. (2013)
Alto Moxotó Terrane (Itatuba)	Borboremba, Brazil	22	6.3	Santos et al. (2013)
Alto Moxotó Terrane (Itatuba)	Borboremba, Brazil	22	5	Santos et al. (2013)
Alto Moxotó Terrane (Itatuba)	Borboremba, Brazil	22	-3.3	Santos et al. (2013)
Alto Moxotó Terrane (Itatuba)	Borboremba, Brazil	22	7.7	Santos et al. (2013)
Dolomite Fm	Kuusamo Schist Belt	22	15.07	Karhu (1993)
Dolomite Fm	Kuusamo Schist Belt	22	8.21	Karhu (1993)
Dolomite Fm	Kuusamo Schist Belt	22	10.41	Karhu (1993)
Dolomite Fm	Kuusamo Schist Belt	22	10.61	Karhu (1993)
Dolomite Fm	Kuusamo Schist Belt	22	10.98	Karhu (1993)
Dolomite Fm	Kuusamo Schist Belt	22	8.17	Karhu (1993)
Dolomite Fm	Kuusamo Schist Belt	22	11.2	Karhu (1993)
Middle Lapponian Gr	Kittila-Kolari	22	5.29	Karhu (1993)
Middle Lapponian Gr	Kittila-Kolari	22	5.92	Karhu (1993)
Middle Lapponian Gr	Kittila-Kolari	22	6.8	Karhu (1993)
Middle Lapponian Gr	Kittila-Kolari	22	5.45	Karhu (1993)
Kivalo Fm	Perapohja Schist Belt	22	8.3	Karhu (1993)
Kivalo Fm	Perapohja Schist Belt	22	8.5	Karhu (1993)
Kivalo Fm	Perapohja Schist Belt	22	10.6	Karhu (1993)
Kivalo Fm	Perapohja Schist Belt	22	7.1	Karhu (1993)
Kivalo Fm	Perapohja Schist Belt	22	6.9	Karhu (1993)
Kivalo Fm	Perapohja Schist Belt	22	5.2	Karhu (1993)
Kivalo Fm	Perapohja Schist Belt	22	9.5	Karhu (1993)
Kivalo Fm	Perapohja Schist Belt	22	10	Karhu (1993)
Rantamaa Fm	Perapohja Schist Belt	22	6.86	Karhu (1993)
Rantamaa Fm	Perapohja Schist Belt	22	7.19	Karhu (1993)
Rantamaa Fm	Perapohja Schist Belt	22	8.49	Karhu (1993)
Rantamaa Fm	Perapohja Schist Belt	22	5.44	Karhu (1993)
Rantamaa Fm	Perapohja Schist Belt	22	7.41	Karhu (1993)
Rantamaa Fm	Perapohja Schist Belt	22	11.29	Karhu (1993)
Rantamaa Fm	Perapohja Schist Belt	22	9.63	Karhu (1993)
Rantamaa Fm	Perapohja Schist Belt	22	11.44	Karhu (1993)
Rantamaa Fm	Perapohja Schist Belt	22	11.13	Karhu (1993)
Rantamaa Fm	Perapohja Schist Belt	22	2.5	Karhu (1993)
Rantamaa Fm	Perapohja Schist Belt	22	5.16	Karhu (1993)
Rantamaa Fm	Perapohja Schist Belt	22	2.91	Karhu (1993)
Rantamaa Fm	Perapohja Schist Belt	22	4.14	Karhu (1993)
Rantamaa Fm	Perapohja Schist Belt	22	3.63	Karhu (1993)
Kvartsimaa Fm	Perapohja Schist Belt	22	8.31	Karhu (1993)
Kvartsimaa Fm	Perapohja Schist Belt	22	8.42	Karhu (1993)
Kvartsimaa Fm	Perapohja Schist Belt	22	9.21	Karhu (1993)
Lofoten-Vesteralen	Norway	22	12.1	Baker & Fallick (1989b)
Lofoten-Vesteralen	Norway	22	10.6	Baker & Fallick (1989b)
Lofoten-Vesteralen	Norway	22	10.9	Baker & Fallick (1989b)
Lofoten-Vesteralen	Norway	22	10.2	Baker & Fallick (1989b)
Lofoten-Vesteralen	Norway	22	10.7	Baker & Fallick (1989b)
Lofoten-Vesteralen	Norway	22	-6.6	Baker & Fallick (1989b)
Lofoten-Vesteralen	Norway	22	-7	Baker & Fallick (1989b)
Lofoten-Vesteralen	Norway	22	3.3	Baker & Fallick (1989b)
Lofoten-Vesteralen	Norway	22	6.5	Baker & Fallick (1989b)
Lofoten-Vesteralen	Norway	22	-0.7	Baker & Fallick (1989b)
Lofoten-Vesteralen	Norway	22	1.7	Baker & Fallick (1989b)
Lofoten-Vesteralen	Norway	22	-6.5	Baker & Fallick (1989b)
Lofoten-Vesteralen	Norway	22	-6.3	Baker & Fallick (1989b)
Lofoten-Vesteralen	Norway	22	-4.5	Baker & Fallick (1989b)
Lofoten-Vesteralen	Norway	22	0.6	Baker & Fallick (1989b)
Lofoten-Vesteralen	Norway	22	-0.1	Baker & Fallick (1989b)
Lofoten-Vesteralen	Norway	22	-1.5	Baker & Fallick (1989b)
Lofoten-Vesteralen	Norway	22	-6.4	Baker & Fallick (1989b)
Lofoten-Vesteralen	Norway	22	2.8	Baker & Fallick (1989b)
Lofoten-Vesteralen	Norway	22	3.3	Baker & Fallick (1989b)
Lofoten-Vesteralen	Norway	22	4.2	Baker & Fallick (1989b)
Lofoten-Vesteralen	Norway	22	1.2	Baker & Fallick (1989b)
Lofoten-Vesteralen	Norway	22	8.3	Baker & Fallick (1989b)
Lofoten-Vesteralen	Norway	22	5.2	Baker & Fallick (1989b)
Lofoten-Vesteralen	Norway	22	-5.6	Baker & Fallick (1989b)
Lofoten-Vesteralen	Norway	22	-4.7	Baker & Fallick (1989b)
Lofoten-Vesteralen	Norway	22	-3.8	Baker & Fallick (1989b)
Lofoten-Vesteralen	Norway	22	-4.2	Baker & Fallick (1989b)
Lofoten-Vesteralen	Norway	22	7	Baker & Fallick (1989b)
Lofoten-Vesteralen	Norway	22	-6.7	Baker & Fallick (1989b)
Lofoten-Vesteralen	Norway	22	-4	Baker & Fallick (1989b)
Lofoten-Vesteralen	Norway	22	-3.2	Baker & Fallick (1989b)
Lofoten-Vesteralen	Norway	22	7.3	Baker & Fallick (1989b)
Lofoten-Vesteralen	Norway	22	3.1	Baker & Fallick (1989b)
Lofoten-Vesteralen	Norway	22	-1.6	Baker & Fallick (1989b)
Lofoten-Vesteralen	Norway	22	-3.3	Baker & Fallick (1989b)
Lofoten-Vesteralen	Norway	22	4	Baker & Fallick (1989b)
Lofoten-Vesteralen	Norway	22	-1.9	Baker & Fallick (1989b)
Lofoten-Vesteralen	Norway	22	4.2	Baker & Fallick (1989b)
Lofoten-Vesteralen	Norway	22	6.4	Baker & Fallick (1989b)
Lofoten-Vesteralen	Norway	22	6.5	Baker & Fallick (1989b)
Lofoten-Vesteralen	Norway	22	8.6	Baker & Fallick (1989b)
Lofoten-Vesteralen	Norway	22	6.3	Baker & Fallick (1989b)
Lofoten-Vesteralen	Norway	22	-1.1	Baker & Fallick (1989b)
Lofoten-Vesteralen	Norway	22	2.7	Baker & Fallick (1989b)
Lofoten-Vesteralen	Norway	22	8.3	Baker & Fallick (1989b)
Lofoten-Vesteralen	Norway	22	10.1	Baker & Fallick (1989b)
Lofoten-Vesteralen	Norway	22	9.5	Baker & Fallick (1989b)
Lofoten-Vesteralen	Norway	22	3.2	Baker & Fallick (1989b)
Lofoten-Vesteralen	Norway	22	10.6	Baker & Fallick (1989b)
Lofoten-Vesteralen	Norway	22	4.6	Baker & Fallick (1989b)
Lofoten-Vesteralen	Norway	22	6	Baker & Fallick (1989b)
Lofoten-Vesteralen	Norway	22	9	Baker & Fallick (1989b)
Lofoten-Vesteralen	Norway	22	7.6	Baker & Fallick (1989b)
Lofoten-Vesteralen	Norway	22	5.4	Baker & Fallick (1989b)
Lofoten-Vesteralen	Norway	22	8.2	Baker & Fallick (1989b)
Lofoten-Vesteralen	Norway	22	9.9	Baker & Fallick (1989b)
Lofoten-Vesteralen	Norway	22	8.3	Baker & Fallick (1989b)
Lofoten-Vesteralen	Norway	22	9.3	Baker & Fallick (1989b)
Lofoten-Vesteralen	Norway	22	10.4	Baker & Fallick (1989b)
Lofoten-Vesteralen	Norway	22	8.9	Baker & Fallick (1989b)
Lofoten-Vesteralen	Norway	22	9.3	Baker & Fallick (1989b)
Lofoten-Vesteralen	Norway	22	7.7	Baker & Fallick (1989b)
Lofoten-Vesteralen	Norway	22	7.1	Baker & Fallick (1989b)
Lofoten-Vesteralen	Norway	22	8.3	Baker & Fallick (1989b)
Lofoten-Vesteralen	Norway	22	8.6	Baker & Fallick (1989b)
Lofoten-Vesteralen	Norway	22	9.8	Baker & Fallick (1989b)
Lofoten-Vesteralen	Norway	22	7	Baker & Fallick (1989b)
Nash Fork Fm	Wyoming-South Dakota, USA	22	26.6	Bekker et al. (2003)
Nash Fork Fm	Wyoming-South Dakota, USA	22	13.7	Bekker et al. (2003)
Nash Fork Fm	Wyoming-South Dakota, USA	22	13.3	Bekker et al. (2003)
Nash Fork Fm	Wyoming-South Dakota, USA	22	13.2	Bekker et al. (2003)
Nash Fork Fm	Wyoming-South Dakota, USA	22	24	Bekker et al. (2003)
Nash Fork Fm	Wyoming-South Dakota, USA	22	25.7	Bekker et al. (2003)
Nash Fork Fm	Wyoming-South Dakota, USA	22	26.5	Bekker et al. (2003)
Nash Fork Fm	Wyoming-South Dakota, USA	22	26	Bekker et al. (2003)
Nash Fork Fm	Wyoming-South Dakota, USA	22	26.7	Bekker et al. (2003)
Nash Fork Fm	Wyoming-South Dakota, USA	22	28.2	Bekker et al. (2003)
Nash Fork Fm	Wyoming-South Dakota, USA	22	26	Bekker et al. (2003)
Nash Fork Fm	Wyoming-South Dakota, USA	22	26.4	Bekker et al. (2003)
Nash Fork Fm	Wyoming-South Dakota, USA	22	6.1	Bekker et al. (2003)
Nash Fork Fm	Wyoming-South Dakota, USA	22	9	Bekker et al. (2003)
Nash Fork Fm	Wyoming-South Dakota, USA	22	7.3	Bekker et al. (2003)
Nash Fork Fm	Wyoming-South Dakota, USA	22	5.1	Bekker et al. (2003)
Nash Fork Fm	Wyoming-South Dakota, USA	22	8.5	Bekker et al. (2003)
Nash Fork Fm	Wyoming-South Dakota, USA	22	8.6	Bekker et al. (2003)
Nash Fork Fm	Wyoming-South Dakota, USA	22	8.5	Bekker et al. (2003)
Nash Fork Fm	Wyoming-South Dakota, USA	22	9	Bekker et al. (2003)
Nash Fork Fm	Wyoming-South Dakota, USA	22	9.9	Bekker et al. (2003)
Nash Fork Fm	Wyoming-South Dakota, USA	22	8.2	Bekker et al. (2003)
Nash Fork Fm	Wyoming-South Dakota, USA	22	8.6	Bekker et al. (2003)
Nash Fork Fm	Wyoming-South Dakota, USA	22	4.8	Bekker et al. (2003)
Nash Fork Fm	Wyoming-South Dakota, USA	22	8.8	Bekker et al. (2003)
Nash Fork Fm	Wyoming-South Dakota, USA	22	6.1	Bekker et al. (2003)
Nash Fork Fm	Wyoming-South Dakota, USA	22	8.9	Bekker et al. (2003)
Nash Fork Fm	Wyoming-South Dakota, USA	22	4.8	Bekker et al. (2003)
Nash Fork Fm	Wyoming-South Dakota, USA	22	6.8	Bekker et al. (2003)
Nash Fork Fm	Wyoming-South Dakota, USA	22	7	Bekker et al. (2003)
Nash Fork Fm	Wyoming-South Dakota, USA	22	7.7	Bekker et al. (2003)
Nash Fork Fm	Wyoming-South Dakota, USA	22	7.1	Bekker et al. (2003)
Nash Fork Fm	Wyoming-South Dakota, USA	22	7.2	Bekker et al. (2003)
Nash Fork Fm	Wyoming-South Dakota, USA	22	7.4	Bekker et al. (2003)
Nash Fork Fm	Wyoming-South Dakota, USA	22	7	Bekker et al. (2003)
Nash Fork Fm	Wyoming-South Dakota, USA	22	8	Bekker et al. (2003)
Nash Fork Fm	Wyoming-South Dakota, USA	22	7.1	Bekker et al. (2003)
Nash Fork Fm	Wyoming-South Dakota, USA	22	8.6	Bekker et al. (2003)
Nash Fork Fm	Wyoming-South Dakota, USA	22	7	Bekker et al. (2003)
Nash Fork Fm	Wyoming-South Dakota, USA	22	6.9	Bekker et al. (2003)
Nash Fork Fm	Wyoming-South Dakota, USA	22	8.3	Bekker et al. (2003)
Nash Fork Fm	Wyoming-South Dakota, USA	22	8.2	Bekker et al. (2003)
Nash Fork Fm	Wyoming-South Dakota, USA	22	5.3	Bekker et al. (2003)
Nash Fork Fm	Wyoming-South Dakota, USA	22	7.1	Bekker et al. (2003)
Nash Fork Fm	Wyoming-South Dakota, USA	22	8	Bekker et al. (2003)
Nash Fork Fm	Wyoming-South Dakota, USA	22	7.5	Bekker et al. (2003)
Nash Fork Fm	Wyoming-South Dakota, USA	22	7.5	Bekker et al. (2003)
Nash Fork Fm	Wyoming-South Dakota, USA	22	7.5	Bekker et al. (2003)
Nash Fork Fm	Wyoming-South Dakota, USA	22	6.3	Bekker et al. (2003)
Nash Fork Fm	Wyoming-South Dakota, USA	22	7.3	Bekker et al. (2003)
Nash Fork Fm	Wyoming-South Dakota, USA	22	8.2	Bekker et al. (2003)
Nash Fork Fm	Wyoming-South Dakota, USA	22	7.2	Bekker et al. (2003)
Nash Fork Fm	Wyoming-South Dakota, USA	22	6.3	Bekker et al. (2003)
Nash Fork Fm	Wyoming-South Dakota, USA	22	6.6	Bekker et al. (2003)
Nash Fork Fm	Wyoming-South Dakota, USA	22	7.1	Bekker et al. (2003)
Nash Fork Fm	Wyoming-South Dakota, USA	22	8.1	Bekker et al. (2003)
Nash Fork Fm	Wyoming-South Dakota, USA	22	6.4	Bekker et al. (2003)
Nash Fork Fm	Wyoming-South Dakota, USA	22	8.2	Bekker et al. (2003)
Nash Fork Fm	Wyoming-South Dakota, USA	22	7.5	Bekker et al. (2003)
Nash Fork Fm	Wyoming-South Dakota, USA	22	6.2	Bekker et al. (2003)
Nash Fork Fm	Wyoming-South Dakota, USA	22	6.9	Bekker et al. (2003)
Nash Fork Fm	Wyoming-South Dakota, USA	22	7.6	Bekker et al. (2003)
Nash Fork Fm	Wyoming-South Dakota, USA	22	7.7	Bekker et al. (2003)
Nash Fork Fm	Wyoming-South Dakota, USA	22	6.3	Bekker et al. (2003)
Nash Fork Fm	Wyoming-South Dakota, USA	22	7.9	Bekker et al. (2003)
Nash Fork Fm	Wyoming-South Dakota, USA	22	7	Bekker et al. (2003)
Nash Fork Fm	Wyoming-South Dakota, USA	22	6.6	Bekker et al. (2003)
Nash Fork Fm	Wyoming-South Dakota, USA	22	5.8	Bekker et al. (2003)
Nash Fork Fm	Wyoming-South Dakota, USA	22	6.2	Bekker et al. (2003)
Nash Fork Fm	Wyoming-South Dakota, USA	22	7.4	Bekker et al. (2003)
Nash Fork Fm	Wyoming-South Dakota, USA	22	7.6	Bekker et al. (2003)
Nash Fork Fm	Wyoming-South Dakota, USA	22	7	Bekker et al. (2003)
Nash Fork Fm	Wyoming-South Dakota, USA	22	7.2	Bekker et al. (2003)
Nash Fork Fm	Wyoming-South Dakota, USA	22	7.1	Bekker et al. (2003)
Nash Fork Fm	Wyoming-South Dakota, USA	22	5.5	Bekker et al. (2003)
Nash Fork Fm	Wyoming-South Dakota, USA	22	3.1	Bekker et al. (2003)
Nash Fork Fm	Wyoming-South Dakota, USA	22	6.6	Bekker et al. (2003)
Nash Fork Fm	Wyoming-South Dakota, USA	22	7.3	Bekker et al. (2003)
Nash Fork Fm	Wyoming-South Dakota, USA	22	6.4	Bekker et al. (2003)
Nash Fork Fm	Wyoming-South Dakota, USA	22	6.7	Bekker et al. (2003)
Nash Fork Fm	Wyoming-South Dakota, USA	22	5.5	Bekker et al. (2003)
Nash Fork Fm	Wyoming-South Dakota, USA	22	5.9	Bekker et al. (2003)
Nash Fork Fm	Wyoming-South Dakota, USA	22	5.6	Bekker et al. (2003)
Nash Fork Fm	Wyoming-South Dakota, USA	22	6.5	Bekker et al. (2003)
Nash Fork Fm	Wyoming-South Dakota, USA	22	6	Bekker et al. (2003)
Nash Fork Fm	Wyoming-South Dakota, USA	22	4.7	Bekker et al. (2003)
Nash Fork Fm	Wyoming-South Dakota, USA	22	4.5	Bekker et al. (2003)
Nash Fork Fm	Wyoming-South Dakota, USA	22	5.4	Bekker et al. (2003)
Nash Fork Fm	Wyoming-South Dakota, USA	22	6.2	Bekker et al. (2003)
Nash Fork Fm	Wyoming-South Dakota, USA	22	6.2	Bekker et al. (2003)
Nash Fork Fm	Wyoming-South Dakota, USA	22	6.1	Bekker et al. (2003)
Nash Fork Fm	Wyoming-South Dakota, USA	22	5.6	Bekker et al. (2003)
Nash Fork Fm	Wyoming-South Dakota, USA	22	5.6	Bekker et al. (2003)
Nash Fork Fm	Wyoming-South Dakota, USA	22	6.1	Bekker et al. (2003)
Nash Fork Fm	Wyoming-South Dakota, USA	22	5.7	Bekker et al. (2003)
Nash Fork Fm	Wyoming-South Dakota, USA	22	7	Bekker et al. (2003)
Nash Fork Fm	Wyoming-South Dakota, USA	22	6.4	Bekker et al. (2003)
Nash Fork Fm	Wyoming-South Dakota, USA	22	7.1	Bekker et al. (2003)
Nash Fork Fm	Wyoming-South Dakota, USA	22	3.9	Bekker et al. (2003)
Nash Fork Fm	Wyoming-South Dakota, USA	22	5.2	Bekker et al. (2003)
Nash Fork Fm	Wyoming-South Dakota, USA	22	5	Bekker et al. (2003)
Nash Fork Fm	Wyoming-South Dakota, USA	22	8.1	Bekker et al. (2003)
Nash Fork Fm	Wyoming-South Dakota, USA	22	7.2	Bekker et al. (2003)
Nash Fork Fm	Wyoming-South Dakota, USA	22	5.5	Bekker et al. (2003)
Nash Fork Fm	Wyoming-South Dakota, USA	22	2	Bekker et al. (2003)
Nash Fork Fm	Wyoming-South Dakota, USA	22	2.4	Bekker et al. (2003)
Nash Fork Fm	Wyoming-South Dakota, USA	22	2.4	Bekker et al. (2003)
Nash Fork Fm	Wyoming-South Dakota, USA	22	2.5	Bekker et al. (2003)
Nash Fork Fm	Wyoming-South Dakota, USA	22	2.2	Bekker et al. (2003)
Nash Fork Fm	Wyoming-South Dakota, USA	22	2.4	Bekker et al. (2003)
Nash Fork Fm	Wyoming-South Dakota, USA	22	2.5	Bekker et al. (2003)
Nash Fork Fm	Wyoming-South Dakota, USA	22	2.5	Bekker et al. (2003)
Nash Fork Fm	Wyoming-South Dakota, USA	22	2.4	Bekker et al. (2003)
Nash Fork Fm	Wyoming-South Dakota, USA	22	1.9	Bekker et al. (2003)
Nash Fork Fm	Wyoming-South Dakota, USA	22	2.4	Bekker et al. (2003)
Nash Fork Fm	Wyoming-South Dakota, USA	22	1.9	Bekker et al. (2003)
Nash Fork Fm	Wyoming-South Dakota, USA	22	0.7	Bekker et al. (2003)
Nash Fork Fm	Wyoming-South Dakota, USA	22	2.4	Bekker et al. (2003)
Nash Fork Fm	Wyoming-South Dakota, USA	22	2.5	Bekker et al. (2003)
Nash Fork Fm	Wyoming-South Dakota, USA	22	1.5	Bekker et al. (2003)
Nash Fork Fm	Wyoming-South Dakota, USA	22	1.1	Bekker et al. (2003)
Nash Fork Fm	Wyoming-South Dakota, USA	22	0.1	Bekker et al. (2003)
Nash Fork Fm	Wyoming-South Dakota, USA	22	0.2	Bekker et al. (2003)
Nash Fork Fm	Wyoming-South Dakota, USA	22	2.5	Bekker et al. (2003)
Nash Fork Fm	Wyoming-South Dakota, USA	22	1	Bekker et al. (2003)
Nash Fork Fm	Wyoming-South Dakota, USA	22	1.1	Bekker et al. (2003)
Nash Fork Fm	Wyoming-South Dakota, USA	22	1.5	Bekker et al. (2003)
Nash Fork Fm	Wyoming-South Dakota, USA	22	1.3	Bekker et al. (2003)
Nash Fork Fm	Wyoming-South Dakota, USA	22	1.6	Bekker et al. (2003)
Nash Fork Fm	Wyoming-South Dakota, USA	22	0.2	Bekker et al. (2003)
Nash Fork Fm	Wyoming-South Dakota, USA	22	0.8	Bekker et al. (2003)
Nash Fork Fm	Wyoming-South Dakota, USA	22	0.6	Bekker et al. (2003)
Nash Fork Fm	Wyoming-South Dakota, USA	22	0.6	Bekker et al. (2003)
Nash Fork Fm	Wyoming-South Dakota, USA	22	0.3	Bekker et al. (2003)
Nash Fork Fm	Wyoming-South Dakota, USA	22	1.1	Bekker et al. (2003)
Nash Fork Fm	Wyoming-South Dakota, USA	22	0.2	Bekker et al. (2003)
Nash Fork Fm	Wyoming-South Dakota, USA	22	0.5	Bekker et al. (2003)
Nash Fork Fm	Wyoming-South Dakota, USA	22	0.1	Bekker et al. (2003)
Nash Fork Fm	Wyoming-South Dakota, USA	22	1.2	Bekker et al. (2003)
Nash Fork Fm	Wyoming-South Dakota, USA	22	1.9	Bekker et al. (2003)
Nash Fork Fm	Wyoming-South Dakota, USA	22	1.4	Bekker et al. (2003)
Slaughterhouse Fm	Wyoming-South Dakota, USA	22	8	Bekker et al. (2003)
Slaughterhouse Fm	Wyoming-South Dakota, USA	22	6.6	Bekker et al. (2003)
Slaughterhouse Fm	Wyoming-South Dakota, USA	22	5.9	Bekker et al. (2003)
Slaughterhouse Fm	Wyoming-South Dakota, USA	22	7.8	Bekker et al. (2003)
Slaughterhouse Fm	Wyoming-South Dakota, USA	22	8.7	Bekker et al. (2003)
Slaughterhouse Fm	Wyoming-South Dakota, USA	22	7.3	Bekker et al. (2003)
Slaughterhouse Fm	Wyoming-South Dakota, USA	22	16.6	Bekker et al. (2003)
Slaughterhouse Fm	Wyoming-South Dakota, USA	22	15.2	Bekker et al. (2003)
Whalen Group	Wyoming-South Dakota, USA	22	1	Bekker et al. (2003)
Whalen Group	Wyoming-South Dakota, USA	22	0.9	Bekker et al. (2003)
Whalen Group	Wyoming-South Dakota, USA	22	0.9	Bekker et al. (2003)
Whalen Group	Wyoming-South Dakota, USA	22	1.1	Bekker et al. (2003)
Whalen Group	Wyoming-South Dakota, USA	22	1.4	Bekker et al. (2003)
Whalen Group	Wyoming-South Dakota, USA	22	0.8	Bekker et al. (2003)
Whalen Group	Wyoming-South Dakota, USA	22	-0.3	Bekker et al. (2003)
Whalen Group	Wyoming-South Dakota, USA	22	1	Bekker et al. (2003)
Whalen Group	Wyoming-South Dakota, USA	22	0.9	Bekker et al. (2003)
Whalen Group	Wyoming-South Dakota, USA	22	1.1	Bekker et al. (2003)
Whalen Group	Wyoming-South Dakota, USA	22	0.7	Bekker et al. (2003)
Whalen Group	Wyoming-South Dakota, USA	22	1.3	Bekker et al. (2003)
Whalen Group	Wyoming-South Dakota, USA	22	2.1	Bekker et al. (2003)
Whalen Group	Wyoming-South Dakota, USA	22	1.2	Bekker et al. (2003)
Whalen Group	Wyoming-South Dakota, USA	22	3.2	Bekker et al. (2003)
Whalen Group	Wyoming-South Dakota, USA	22	6.3	Bekker et al. (2003)
Whalen Group	Wyoming-South Dakota, USA	22	2.8	Bekker et al. (2003)
Whalen Group	Wyoming-South Dakota, USA	22	7.3	Bekker et al. (2003)
Whalen Group	Wyoming-South Dakota, USA	22	5.9	Bekker et al. (2003)
Whalen Group	Wyoming-South Dakota, USA	22	8.2	Bekker et al. (2003)
Whalen Group	Wyoming-South Dakota, USA	22	4.5	Bekker et al. (2003)
Whalen Group	Wyoming-South Dakota, USA	22	5.4	Bekker et al. (2003)
Whalen Group	Wyoming-South Dakota, USA	22	8	Bekker et al. (2003)
Whalen Group	Wyoming-South Dakota, USA	22	4.8	Bekker et al. (2003)
Whalen Group	Wyoming-South Dakota, USA	22	0.1	Bekker et al. (2003)
Whalen Group	Wyoming-South Dakota, USA	22	5.2	Bekker et al. (2003)
Whalen Group	Wyoming-South Dakota, USA	22	6.9	Bekker et al. (2003)
Whalen Group	Wyoming-South Dakota, USA	22	5.6	Bekker et al. (2003)
Whalen Group	Wyoming-South Dakota, USA	22	6.2	Bekker et al. (2003)
Whalen Group	Wyoming-South Dakota, USA	22	2	Bekker et al. (2003)
Whalen Group	Wyoming-South Dakota, USA	22	3.7	Bekker et al. (2003)
Whalen Group	Wyoming-South Dakota, USA	22	0.5	Bekker et al. (2003)
Whalen Group	Wyoming-South Dakota, USA	22	0.3	Bekker et al. (2003)
Whalen Group	Wyoming-South Dakota, USA	22	-0.3	Bekker et al. (2003)
Whalen Group	Wyoming-South Dakota, USA	22	0.4	Bekker et al. (2003)
Whalen Group	Wyoming-South Dakota, USA	22	0.5	Bekker et al. (2003)
Whalen Group	Wyoming-South Dakota, USA	22	7.9	Bekker et al. (2003)
Boxelder Fm, SD	Wyoming-South Dakota, USA	22	1	Bekker et al. (2003)
Boxelder Fm, SD	Wyoming-South Dakota, USA	22	0.7	Bekker et al. (2003)
Boxelder Fm, SD	Wyoming-South Dakota, USA	22	0.7	Bekker et al. (2003)
Boxelder Fm, SD	Wyoming-South Dakota, USA	22	0.8	Bekker et al. (2003)
Boxelder Fm, SD	Wyoming-South Dakota, USA	22	1	Bekker et al. (2003)
Boxelder Fm, SD	Wyoming-South Dakota, USA	22	0.5	Bekker et al. (2003)
Boxelder Fm, SD	Wyoming-South Dakota, USA	22	1.1	Bekker et al. (2003)
Boxelder Fm, SD	Wyoming-South Dakota, USA	22	-0.7	Bekker et al. (2003)
Boxelder Fm, SD	Wyoming-South Dakota, USA	22	-1.4	Bekker et al. (2003)
Boxelder Fm, SD	Wyoming-South Dakota, USA	22	-0.1	Bekker et al. (2003)
Boxelder Fm, SD	Wyoming-South Dakota, USA	22	-1.1	Bekker et al. (2003)
Boxelder Fm, SD	Wyoming-South Dakota, USA	22	-1.3	Bekker et al. (2003)
Boxelder Fm, SD	Wyoming-South Dakota, USA	22	-1.8	Bekker et al. (2003)
Boxelder Fm, SD	Wyoming-South Dakota, USA	22	-0.7	Bekker et al. (2003)
Boxelder Fm, SD	Wyoming-South Dakota, USA	22	-0.8	Bekker et al. (2003)
Estes Creek Fm, SD	Wyoming-South Dakota, USA	22	1.3	Bekker et al. (2003)
Estes Creek Fm, SD	Wyoming-South Dakota, USA	22	1.4	Bekker et al. (2003)
Estes Creek Fm, SD	Wyoming-South Dakota, USA	22	2.2	Bekker et al. (2003)
Estes Creek Fm, SD	Wyoming-South Dakota, USA	22	2.3	Bekker et al. (2003)
Estes Creek Fm, SD	Wyoming-South Dakota, USA	22	2.1	Bekker et al. (2003)
Estes Creek Fm, SD	Wyoming-South Dakota, USA	22	2.1	Bekker et al. (2003)
Estes Creek Fm, SD	Wyoming-South Dakota, USA	22	2	Bekker et al. (2003)
Estes Creek Fm, SD	Wyoming-South Dakota, USA	22	2.3	Bekker et al. (2003)
Estes Creek Fm, SD	Wyoming-South Dakota, USA	22	2.4	Bekker et al. (2003)
Estes Creek Fm, SD	Wyoming-South Dakota, USA	22	2.2	Bekker et al. (2003)
Estes Creek Fm, SD	Wyoming-South Dakota, USA	22	2.5	Bekker et al. (2003)
Estes Creek Fm, SD	Wyoming-South Dakota, USA	22	2.4	Bekker et al. (2003)
Roberts Draw Fm, SD	Wyoming-South Dakota, USA	22	-0.4	Bekker et al. (2003)
Roberts Draw Fm, SD	Wyoming-South Dakota, USA	22	1.3	Bekker et al. (2003)
Roberts Draw Fm, SD	Wyoming-South Dakota, USA	22	1.6	Bekker et al. (2003)
Roberts Draw Fm, SD	Wyoming-South Dakota, USA	22	1.2	Bekker et al. (2003)
Roberts Draw Fm, SD	Wyoming-South Dakota, USA	22	1.9	Bekker et al. (2003)
Roberts Draw Fm, SD	Wyoming-South Dakota, USA	22	-0.2	Bekker et al. (2003)
Roberts Draw Fm, SD	Wyoming-South Dakota, USA	22	-0.2	Bekker et al. (2003)
Roberts Draw Fm, SD	Wyoming-South Dakota, USA	22	-1.1	Bekker et al. (2003)
Roberts Draw Fm, SD	Wyoming-South Dakota, USA	22	0	Bekker et al. (2003)
Roberts Draw Fm, SD	Wyoming-South Dakota, USA	22	-3.5	Bekker et al. (2003)
Roberts Draw Fm, SD	Wyoming-South Dakota, USA	22	1.1	Bekker et al. (2003)
Gordon Lake Fm	Lake Superior area	22	7.2	Bekker et al. (2006)
Gordon Lake Fm	Lake Superior area	22	7.3	Bekker et al. (2006)
Gordon Lake Fm	Lake Superior area	22	6.4	Bekker et al. (2006)
Gordon Lake Fm	Lake Superior area	22	6.9	Bekker et al. (2006)
Gordon Lake Fm	Lake Superior area	22	8.2	Bekker et al. (2006)
Gordon Lake Fm	Lake Superior area	22	5	Bekker et al. (2006)
Gordon Lake Fm	Lake Superior area	22	5	Bekker et al. (2006)
Gordon Lake Fm	Lake Superior area	22	6.2	Bekker et al. (2006)
Gordon Lake Fm	Lake Superior area	22	5.8	Bekker et al. (2006)
Gordon Lake Fm	Lake Superior area	22	8	Bekker et al. (2006)
Gordon Lake Fm	Lake Superior area	22	7.7	Bekker et al. (2006)
Gordon Lake Fm	Lake Superior area	22	7.1	Bekker et al. (2006)
Gordon Lake Fm	Lake Superior area	22	7.6	Bekker et al. (2006)
Gordon Lake Fm	Lake Superior area	22	8.2	Bekker et al. (2006)
Gordon Lake Fm	Lake Superior area	22	2.1	Bekker et al. (2006)
Gordon Lake Fm	Lake Superior area	22	5.7	Bekker et al. (2006)
Gordon Lake Fm	Lake Superior area	22	5.9	Bekker et al. (2006)
Gordon Lake Fm	Lake Superior area	22	5.6	Bekker et al. (2006)
Gordon Lake Fm	Lake Superior area	22	5.8	Bekker et al. (2006)
Gordon Lake Fm	Lake Superior area	22	5.6	Bekker et al. (2006)
Gordon Lake Fm	Lake Superior area	22	5.5	Bekker et al. (2006)
Gordon Lake Fm	Lake Superior area	22	5.8	Bekker et al. (2006)
Gordon Lake Fm	Lake Superior area	22	6.2	Bekker et al. (2006)
Gordon Lake Fm	Lake Superior area	22	5.5	Bekker et al. (2006)
Gordon Lake Fm	Lake Superior area	22	5.5	Bekker et al. (2006)
Gordon Lake Fm	Lake Superior area	22	7.5	Bekker et al. (2006)
Gordon Lake Fm	Lake Superior area	22	2.6	Bekker et al. (2006)
Gordon Lake Fm	Lake Superior area	22	4.3	Bekker et al. (2006)
Gordon Lake Fm	Lake Superior area	22	4.2	Bekker et al. (2006)
[truncated: 9,558 more rows]

## Sheet: 3.0–1.0 Ga arithmetic average
Unit	location	Geon	13Ccarb V-PDB	reference					Unit	location	Geon	13Ccarb V-PDB	reference
Pongola Supergroup	N. Natal	29	1.2	Eglington et al. (2003)						10 Average	10	1.38934
Pongola Supergroup	N. Natal	29	1.6	Eglington et al. (2003)						11 Average	11	0.270059
Pongola Supergroup	N. Natal	29	2.1	Eglington et al. (2003)						12 Average	12	2.15406
Pongola Supergroup	N. Natal	29	2	Eglington et al. (2003)						13 Average	13	-0.106897
Pongola Supergroup	N. Natal	29	1.5	Eglington et al. (2003)						14 Average	14	-0.448639
Pongola Supergroup (Insuzi Gp)	Natal	29	-0.14	Schidlowski et al. (1983)						15 Average	15	-0.268684
Pongola Supergroup (Insuzi Gp)	Natal	29	1.8	Schidlowski et al. (1983)						16 Average	16	-0.823619
Pongola Supergroup (Insuzi Gp)	Natal	29	2.1	Schidlowski et al. (1983)						17 Average	17	1.40649
Pongola Supergroup (Insuzi Gp)	Natal	29	1.1	Schidlowski et al. (1983)						18 Average	18	0.529514
Pongola Supergroup (Insuzi Gp)	Natal	29	2.1	Schidlowski et al. (1983)						19 Average	19	0.0282275
Pongola Supergroup (Insuzi Gp)	Natal	29	1.4	Schidlowski et al. (1983)						20 Average	20	1.99291
Pongola Supergroup (Insuzi Gp)	Natal	29	1.8	Schidlowski et al. (1983)						21 Average	21	5.35047
Pongola Supergroup (Insuzi Gp)	Natal	29	2.9	Schidlowski et al. (1983)						22 Average	22	4.753
Tholeni Dolomite	Natal	29	0.23	Veizer et al. (1990)						23 Average	23	4.00778
Tholeni Dolomite	Natal	29	0.15	Veizer et al. (1990)						24 Average	24	0.208333
Tholeni Dolomite	Natal	29	2.6	Veizer et al. (1990)						25 Average	25	-0.493047
Tholeni Dolomite	Natal	29	-0.45	Veizer et al. (1990)						26 Average	26	-0.317193
Tholeni Dolomite	Natal	29	2.5	Veizer et al. (1990)						27 Average	27	-0.335723
Ubatha Dolomite	Natal	29	0.01	Veizer et al. (1990)						29 Average	29	1.39184
Ubatha Dolomite	Natal	29	3.02	Veizer et al. (1990)
Ubatha Dolomite	Natal	29	2	Veizer et al. (1990)
Ubatha Dolomite	Natal	29	0.29	Veizer et al. (1990)
Ubatha Dolomite	Natal	29	2.11	Veizer et al. (1990)
Ubatha Dolomite	Natal	29	2.6	Veizer et al. (1990)
Ubatha Dolomite	Natal	29	-0.12	Veizer et al. (1990)
Ubatha Dolomite	Natal	29	0.1	Veizer et al. (1990)
Ubatha Dolomite	Natal	29	0.5	Veizer et al. (1990)
Ubatha Dolomite	Natal	29	2.71	Veizer et al. (1990)
Ubatha Dolomite	Natal	29	1.5	Veizer et al. (1990)
Ubatha Dolomite	Natal	29	2.84	Veizer et al. (1990)
Ubatha Dolomite	Natal	29	-0.21	Veizer et al. (1990)
Mandeva Dolomite	Natal	29	1.6	Veizer et al. (1990)
Mandeva Dolomite	Natal	29	1.5	Veizer et al. (1990)
Mandeva Dolomite	Natal	29	1.7	Veizer et al. (1990)
Red Lake-Wallace Lake units	Ontario, Canada	29	1.59	Mcintyre & Frallick (2017)
Red Lake-Wallace Lake units	Ontario, Canada	29	0.38	Mcintyre & Frallick (2017)
Red Lake-Wallace Lake units	Ontario, Canada	29	0.26	Mcintyre & Frallick (2017)
Red Lake-Wallace Lake units	Ontario, Canada	29	0.14	Mcintyre & Frallick (2017)
Red Lake-Wallace Lake units	Ontario, Canada	29	0.62	Mcintyre & Frallick (2017)
Red Lake-Wallace Lake units	Ontario, Canada	29	0.7	Mcintyre & Frallick (2017)
Red Lake-Wallace Lake units	Ontario, Canada	29	0.78	Mcintyre & Frallick (2017)
Red Lake-Wallace Lake units	Ontario, Canada	29	0.76	Mcintyre & Frallick (2017)
Red Lake-Wallace Lake units	Ontario, Canada	29	0.93	Mcintyre & Frallick (2017)
Red Lake-Wallace Lake units	Ontario, Canada	29	0.36	Mcintyre & Frallick (2017)
Red Lake-Wallace Lake units	Ontario, Canada	29	0.63	Mcintyre & Frallick (2017)
Red Lake-Wallace Lake units	Ontario, Canada	29	-0.33	Mcintyre & Frallick (2017)
Red Lake-Wallace Lake units	Ontario, Canada	29	0.64	Mcintyre & Frallick (2017)
Red Lake-Wallace Lake units	Ontario, Canada	29	0.46	Mcintyre & Frallick (2017)
Red Lake-Wallace Lake units	Ontario, Canada	29	-1	Mcintyre & Frallick (2017)
Red Lake-Wallace Lake units	Ontario, Canada	29	0.19	Mcintyre & Frallick (2017)
Red Lake-Wallace Lake units	Ontario, Canada	29	-0.24	Mcintyre & Frallick (2017)
Red Lake-Wallace Lake units	Ontario, Canada	29	0.41	Mcintyre & Frallick (2017)
Pongola SuperGp (Nsuza Gp)	South Africa	29	1.5	Siahi et al. (2018)
Pongola SuperGp (Nsuza Gp)	South Africa	29	1.7	Siahi et al. (2018)
Pongola SuperGp (Nsuza Gp)	South Africa	29	1.9	Siahi et al. (2018)
Pongola SuperGp (Nsuza Gp)	South Africa	29	2.1	Siahi et al. (2018)
Pongola SuperGp (Nsuza Gp)	South Africa	29	2.3	Siahi et al. (2018)
Pongola SuperGp (Nsuza Gp)	South Africa	29	2.2	Siahi et al. (2018)
Pongola SuperGp (Nsuza Gp)	South Africa	29	2.5	Siahi et al. (2018)
Pongola SuperGp (Nsuza Gp)	South Africa	29	2.3	Siahi et al. (2018)
Pongola SuperGp (Nsuza Gp)	South Africa	29	2.1	Siahi et al. (2018)
Pongola SuperGp (Nsuza Gp)	South Africa	29	0.2	Siahi et al. (2018)
Pongola SuperGp (Nsuza Gp)	South Africa	29	2.4	Siahi et al. (2018)
Pongola SuperGp (Nsuza Gp)	South Africa	29	0.1	Siahi et al. (2018)
Pongola SuperGp (Nsuza Gp)	South Africa	29	2.4	Siahi et al. (2018)
Pongola SuperGp (Nsuza Gp)	South Africa	29	2.3	Siahi et al. (2018)
Pongola SuperGp (Nsuza Gp)	South Africa	29	2.2	Siahi et al. (2018)
Pongola SuperGp (Nsuza Gp)	South Africa	29	2.4	Siahi et al. (2018)
Pongola SuperGp (Nsuza Gp)	South Africa	29	2.3	Siahi et al. (2018)
Pongola SuperGp (Nsuza Gp)	South Africa	29	2.2	Siahi et al. (2018)
Pongola SuperGp (Nsuza Gp)	South Africa	29	2.5	Siahi et al. (2018)
Pongola SuperGp (Nsuza Gp)	South Africa	29	2.1	Siahi et al. (2018)
Pongola SuperGp (Nsuza Gp)	South Africa	29	2.4	Siahi et al. (2018)
Pongola SuperGp (Nsuza Gp)	South Africa	29	2.3	Siahi et al. (2018)
Pongola SuperGp (Nsuza Gp)	South Africa	29	1.5	Siahi et al. (2018)
Pongola SuperGp (Nsuza Gp)	South Africa	29	2.4	Siahi et al. (2018)
Pongola SuperGp (Nsuza Gp)	South Africa	29	2.4	Siahi et al. (2018)
Pongola SuperGp (Nsuza Gp)	South Africa	29	2.4	Siahi et al. (2018)
Pongola SuperGp (Nsuza Gp)	South Africa	29	2.5	Siahi et al. (2018)
Pongola SuperGp (Nsuza Gp)	South Africa	29	2.5	Siahi et al. (2018)
Pongola SuperGp (Nsuza Gp)	South Africa	29	2.4	Siahi et al. (2018)
Pongola SuperGp (Nsuza Gp)	South Africa	29	2.5	Siahi et al. (2018)
Pongola SuperGp (Nsuza Gp)	South Africa	29	2.5	Siahi et al. (2018)
Pongola SuperGp (Nsuza Gp)	South Africa	29	2.5	Siahi et al. (2018)
Pongola SuperGp (Nsuza Gp)	South Africa	29	2.5	Siahi et al. (2018)
Pongola SuperGp (Nsuza Gp)	South Africa	29	2.5	Siahi et al. (2018)
Pongola SuperGp (Nsuza Gp)	South Africa	29	2.4	Siahi et al. (2018)
Pongola SuperGp (Nsuza Gp)	South Africa	29	2.3	Siahi et al. (2018)
Pongola SuperGp (Nsuza Gp)	South Africa	29	2.4	Siahi et al. (2018)
Pongola SuperGp (Nsuza Gp)	South Africa	29	2.2	Siahi et al. (2018)
Pongola SuperGp (Nsuza Gp)	South Africa	29	2.1	Siahi et al. (2018)
Pongola SuperGp (Nsuza Gp)	South Africa	29	1.9	Siahi et al. (2018)
Pongola SuperGp (Nsuza Gp)	South Africa	29	1.8	Siahi et al. (2018)
Pongola SuperGp (Nsuza Gp)	South Africa	29	2	Siahi et al. (2018)
Pongola SuperGp (Nsuza Gp)	South Africa	29	0	Siahi et al. (2018)
Pongola SuperGp (Nsuza Gp)	South Africa	29	0.4	Siahi et al. (2018)
Pongola SuperGp (Nsuza Gp)	South Africa	29	0.1	Siahi et al. (2018)
Pongola SuperGp (Nsuza Gp)	South Africa	29	1.7	Siahi et al. (2018)
Pongola SuperGp (Nsuza Gp)	South Africa	29	2.1	Siahi et al. (2018)
Pongola SuperGp (Nsuza Gp)	South Africa	29	1.8	Siahi et al. (2018)
Pongola SuperGp (Nsuza Gp)	South Africa	29	1.7	Siahi et al. (2018)
Pongola SuperGp (Nsuza Gp)	South Africa	29	1.5	Siahi et al. (2018)
Pongola SuperGp (Nsuza Gp)	South Africa	29	1.8	Siahi et al. (2018)
Pongola SuperGp (Nsuza Gp)	South Africa	29	1.7	Siahi et al. (2018)
Pongola SuperGp (Nsuza Gp)	South Africa	29	1.7	Siahi et al. (2018)
Pongola SuperGp (Nsuza Gp)	South Africa	29	1.8	Siahi et al. (2018)
Pongola SuperGp (Nsuza Gp)	South Africa	29	1.8	Siahi et al. (2018)
Pongola SuperGp (Nsuza Gp)	South Africa	29	1.9	Siahi et al. (2018)
Pongola SuperGp (Nsuza Gp)	South Africa	29	2.1	Siahi et al. (2018)
Pongola SuperGp (Nsuza Gp)	South Africa	29	2.1	Siahi et al. (2018)
Pongola SuperGp (Nsuza Gp)	South Africa	29	2.1	Siahi et al. (2018)
Pongola SuperGp (Nsuza Gp)	South Africa	29	2.2	Siahi et al. (2018)
Pongola SuperGp (Nsuza Gp)	South Africa	29	2.2	Siahi et al. (2018)
Pongola SuperGp (Nsuza Gp)	South Africa	29	1.1	Siahi et al. (2018)
Pongola SuperGp (Nsuza Gp)	South Africa	29	-2.4	Siahi et al. (2018)
Pongola SuperGp (Nsuza Gp)	South Africa	29	0.6	Siahi et al. (2018)
Pongola SuperGp (Nsuza Gp)	South Africa	29	2	Siahi et al. (2018)
Pongola SuperGp (Nsuza Gp)	South Africa	29	1.5	Siahi et al. (2018)
Pongola SuperGp (Nsuza Gp)	South Africa	29	1.2	Siahi et al. (2018)
Pongola SuperGp (Nsuza Gp)	South Africa	29	1.2	Siahi et al. (2018)
Pongola SuperGp (Nsuza Gp)	South Africa	29	1.2	Siahi et al. (2018)
Pongola SuperGp (Nsuza Gp)	South Africa	29	1.1	Siahi et al. (2018)
Pongola SuperGp (Nsuza Gp)	South Africa	29	1.2	Siahi et al. (2018)
Pongola SuperGp (Nsuza Gp)	South Africa	29	1.3	Siahi et al. (2018)
Pongola SuperGp (Nsuza Gp)	South Africa	29	1.2	Siahi et al. (2018)
Pongola SuperGp (Nsuza Gp)	South Africa	29	2.3	Siahi et al. (2018)
Pongola SuperGp (Nsuza Gp)	South Africa	29	1.7	Siahi et al. (2018)
Pongola SuperGp (Nsuza Gp)	South Africa	29	1.6	Siahi et al. (2018)
Pongola SuperGp (Nsuza Gp)	South Africa	29	1.7	Siahi et al. (2018)
Pongola SuperGp (Nsuza Gp)	South Africa	29	1.8	Siahi et al. (2018)
Pongola SuperGp (Nsuza Gp)	South Africa	29	2	Siahi et al. (2018)
Pongola SuperGp (Nsuza Gp)	South Africa	29	2.2	Siahi et al. (2018)
Pongola SuperGp (Nsuza Gp)	South Africa	29	2.2	Siahi et al. (2018)
Pongola SuperGp (Nsuza Gp)	South Africa	29	1.4	Siahi et al. (2018)
Pongola SuperGp (Nsuza Gp)	South Africa	29	1.4	Siahi et al. (2018)
Pongola SuperGp (Nsuza Gp)	South Africa	29	1.6	Siahi et al. (2018)
Pongola SuperGp (Nsuza Gp)	South Africa	29	1.8	Siahi et al. (2018)
Pongola SuperGp (Nsuza Gp)	South Africa	29	-0.41	Siahi et al. (2018)
Pongola SuperGp (Nsuza Gp)	South Africa	29	1.4	Siahi et al. (2018)
Pongola SuperGp (Nsuza Gp)	South Africa	29	1.5	Siahi et al. (2018)
Pongola SuperGp (Nsuza Gp)	South Africa	29	1.4	Siahi et al. (2018)
Pongola SuperGp (Nsuza Gp)	South Africa	29	2	Siahi et al. (2018)
Pongola SuperGp (Nsuza Gp)	South Africa	29	1.5	Siahi et al. (2018)
Pongola SuperGp (Nsuza Gp)	South Africa	29	1.9	Siahi et al. (2018)
Pongola SuperGp (Nsuza Gp)	South Africa	29	1.4	Siahi et al. (2018)
Pongola SuperGp (Nsuza Gp)	South Africa	29	1.6	Siahi et al. (2018)
Pongola SuperGp (Nsuza Gp)	South Africa	29	1.4	Siahi et al. (2018)
Pongola SuperGp (Nsuza Gp)	South Africa	29	1.2	Siahi et al. (2018)
Pongola SuperGp (Nsuza Gp)	South Africa	29	1.4	Siahi et al. (2018)
Pongola SuperGp (Nsuza Gp)	South Africa	29	1.5	Siahi et al. (2018)
Pongola SuperGp (Nsuza Gp)	South Africa	29	1.1	Siahi et al. (2018)
Pongola SuperGp (Nsuza Gp)	South Africa	29	1.4	Siahi et al. (2018)
Pongola SuperGp (Nsuza Gp)	South Africa	29	0.2	Siahi et al. (2018)
Pongola SuperGp (Nsuza Gp)	South Africa	29	0.4	Siahi et al. (2018)
Pongola SuperGp (Nsuza Gp)	South Africa	29	0.3	Siahi et al. (2018)
Pongola SuperGp (Nsuza Gp)	South Africa	29	0.1	Siahi et al. (2018)
Uchi Greenstone Belt	Woman Lake, Ontario	29	-3.6	Veizer et al. (1989)
Uchi Greenstone Belt	Woman Lake, Ontario	29	0.89	Veizer et al. (1989)
Uchi Greenstone Belt	Woman Lake, Ontario	29	0.2	Veizer et al. (1989)
Uchi Greenstone Belt	Woman Lake, Ontario	29	0.61	Veizer et al. (1989)
Uchi Greenstone Belt	Woman Lake, Ontario	29	0.3	Veizer et al. (1989)
Uchi Greenstone Belt	Woman Lake, Ontario	29	0.9	Veizer et al. (1989)
Uchi Greenstone Belt	Woman Lake, Ontario	29	0.8	Veizer et al. (1989)
Uchi Greenstone Belt	Woman Lake, Ontario	29	1.14	Veizer et al. (1989)
Uchi Greenstone Belt	Woman Lake, Ontario	29	0.9	Veizer et al. (1989)
Uchi Greenstone Belt	Woman Lake, Ontario	29	0.87	Veizer et al. (1989)
Uchi Greenstone Belt	Woman Lake, Ontario	29	1.18	Veizer et al. (1989)
Uchi Greenstone Belt	Woman Lake, Ontario	29	0.97	Veizer et al. (1989)
Uchi Greenstone Belt	Woman Lake, Ontario	29	1.23	Veizer et al. (1989)
Uchi Greenstone Belt	Woman Lake, Ontario	29	1.07	Veizer et al. (1989)
Uchi Greenstone Belt	Woman Lake, Ontario	29	0.81	Veizer et al. (1989)
Uchi Greenstone Belt	Woman Lake, Ontario	29	0.4	Veizer et al. (1989)
Uchi Greenstone Belt	Woman Lake, Ontario	29	1.3	Veizer et al. (1989)
Uchi Greenstone Belt	Woman Lake, Ontario	29	1.3	Veizer et al. (1989)
Michipicoten Greenstone Belt	Algoma Mines, Ontario	27	2.39	Veizer et al. (1989)
Michipicoten Greenstone Belt	Algoma Mines, Ontario	27	1.99	Veizer et al. (1989)
Michipicoten Greenstone Belt	Algoma Mines, Ontario	27	2.42	Veizer et al. (1989)
Michipicoten Greenstone Belt	Algoma Mines, Ontario	27	2.28	Veizer et al. (1989)
Michipicoten Greenstone Belt	Algoma Mines, Ontario	27	2.46	Veizer et al. (1989)
Michipicoten Greenstone Belt	Algoma Mines, Ontario	27	2.42	Veizer et al. (1989)
Michipicoten Greenstone Belt	Algoma Mines, Ontario	27	2.43	Veizer et al. (1989)
Michipicoten Greenstone Belt	Algoma Mines, Ontario	27	2.3	Veizer et al. (1989)
Michipicoten Greenstone Belt	Algoma Mines, Ontario	27	2.58	Veizer et al. (1989)
Michipicoten Greenstone Belt	Algoma Mines, Ontario	27	2.5	Veizer et al. (1989)
Michipicoten Greenstone Belt	Algoma Mines, Ontario	27	2.45	Veizer et al. (1989)
Michipicoten Greenstone Belt	Algoma Mines, Ontario	27	2.34	Veizer et al. (1989)
Michipicoten Greenstone Belt	Algoma Mines, Ontario	27	3.69	Veizer et al. (1989)
Michipicoten Greenstone Belt	Algoma Mines, Ontario	27	2.76	Veizer et al. (1989)
Michipicoten Greenstone Belt	Algoma Mines, Ontario	27	2.99	Veizer et al. (1989)
Michipicoten Greenstone Belt	Algoma Mines, Ontario	27	2.35	Veizer et al. (1989)
Michipicoten Greenstone Belt	Algoma Mines, Ontario	27	2.64	Veizer et al. (1989)
Michipicoten Greenstone Belt	Algoma Mines, Ontario	27	2.56	Veizer et al. (1989)
Michipicoten Greenstone Belt	Algoma Mines, Ontario	27	2.78	Veizer et al. (1989)
Michipicoten Greenstone Belt	Algoma Mines, Ontario	27	2.56	Veizer et al. (1989)
Michipicoten Greenstone Belt	Algoma Mines, Ontario	27	2.57	Veizer et al. (1989)
Ngesi Group (Manjeri Fm)	Belingwe Belt, Zimbabwe	27	-7.2	Schidlowski et al. (1983)
Ngesi Group (Manjeri Fm)	Belingwe Belt, Zimbabwe	27	-7.1	Schidlowski et al. (1983)
Ngesi Group (Manjeri Fm)	Belingwe Belt, Zimbabwe	27	-5.7	Schidlowski et al. (1983)
Ngesi Group (Manjeri Fm)	Belingwe Belt, Zimbabwe	27	-0.2	Abell et al. (1985)
Ngesi Group (Manjeri Fm)	Belingwe Belt, Zimbabwe	27	-0.4	Abell et al. (1985)
Ngesi Group (Manjeri Fm)	Belingwe Belt, Zimbabwe	27	-0.14	Abell et al. (1985)
Ngesi Group (Manjeri Fm)	Belingwe Belt, Zimbabwe	27	0.08	Abell et al. (1985)
Ngesi Group (Manjeri Fm)	Belingwe Belt, Zimbabwe	27	0.34	Abell et al. (1985)
Ngesi Group (Manjeri Fm)	Belingwe Belt, Zimbabwe	27	-0.6	Abell et al. (1985)
Ngesi Group (Manjeri Fm)	Belingwe Belt, Zimbabwe	27	-0.2	Abell et al. (1985)
Ngesi Group (Manjeri Fm)	Belingwe Belt, Zimbabwe	27	-0.14	Abell et al. (1985)
Ngesi Group (Manjeri Fm)	Belingwe Belt, Zimbabwe	27	-0.23	Abell et al. (1985)
Ngesi Group (Manjeri Fm)	Belingwe Belt, Zimbabwe	27	0.42	Abell et al. (1985)
Ngesi Group (Manjeri Fm)	Belingwe Belt, Zimbabwe	27	0.33	Abell et al. (1985)
Ngesi Group (Manjeri Fm)	Belingwe Belt, Zimbabwe	27	-0.64	Abell et al. (1985)
Ngesi Group (Manjeri Fm)	Belingwe Belt, Zimbabwe	27	-0.18	Abell et al. (1985)
Ngesi Group (Manjeri Fm)	Belingwe Belt, Zimbabwe	27	-0.16	Abell et al. (1985)
Ngesi Group (Manjeri Fm)	Belingwe Belt, Zimbabwe	27	-0.18	Abell et al. (1985)
Ngesi Group (Manjeri Fm)	Belingwe Belt, Zimbabwe	27	-0.16	Abell et al. (1985)
Ngesi Group (Manjeri Fm)	Belingwe Belt, Zimbabwe	27	-0.38	Abell et al. (1985)
Ngesi Group (Manjeri Fm)	Belingwe Belt, Zimbabwe	27	-0.33	Abell et al. (1985)
Ngesi Group (Manjeri Fm)	Belingwe Belt, Zimbabwe	27	-0.41	Abell et al. (1985)
Ngesi Group (Manjeri Fm)	Belingwe Belt, Zimbabwe	27	-0.25	Abell et al. (1985)
Ngesi Group (Manjeri Fm)	Belingwe Belt, Zimbabwe	27	-0.28	Abell et al. (1985)
Ngesi Group (Manjeri Fm)	Belingwe Belt, Zimbabwe	27	-0.19	Abell et al. (1985)
Ngesi Group (Manjeri Fm)	Belingwe Belt, Zimbabwe	27	-0.41	Abell et al. (1985)
Ngesi Group (Manjeri Fm)	Belingwe Belt, Zimbabwe	27	-0.34	Abell et al. (1985)
Ngesi Group (Manjeri Fm)	Belingwe Belt, Zimbabwe	27	-0.44	Abell et al. (1985)
Ngesi Group (Manjeri Fm)	Belingwe Belt, Zimbabwe	27	-0.19	Abell et al. (1985)
Ngesi Group (Manjeri Fm)	Belingwe Belt, Zimbabwe	27	-0.06	Abell et al. (1985)
Ngesi Group (Manjeri Fm)	Belingwe Belt, Zimbabwe	27	-0.24	Abell et al. (1985)
Ngesi Group (Manjeri Fm)	Belingwe Belt, Zimbabwe	27	-0.2	Abell et al. (1985)
Ngesi Group (Manjeri Fm)	Belingwe Belt, Zimbabwe	27	-0.19	Abell et al. (1985)
Ngesi Group (Manjeri Fm)	Belingwe Belt, Zimbabwe	27	-0.2	Abell et al. (1985)
Ngesi Group (Manjeri Fm)	Belingwe Belt, Zimbabwe	27	-0.07	Abell et al. (1985)
Ngesi Group (Manjeri Fm)	Belingwe Belt, Zimbabwe	27	0	Abell et al. (1985)
Ngesi Group (Manjeri Fm)	Belingwe Belt, Zimbabwe	27	-0.27	Abell et al. (1985)
Ngesi Group (Manjeri Fm)	Belingwe Belt, Zimbabwe	27	0.43	Abell et al. (1985)
Ngesi Group (Manjeri Fm)	Belingwe Belt, Zimbabwe	27	-0.05	Abell et al. (1985)
Ngesi Group (Manjeri Fm)	Belingwe Belt, Zimbabwe	27	-0.11	Abell et al. (1985)
Ngesi Group (Manjeri Fm)	Belingwe Belt, Zimbabwe	27	-0.03	Abell et al. (1985)
Ngesi Group (Manjeri Fm)	Belingwe Belt, Zimbabwe	27	0.12	Abell et al. (1985)
Ngesi Group (Manjeri Fm)	Belingwe Belt, Zimbabwe	27	-0.07	Abell et al. (1985)
Ngesi Group (Manjeri Fm)	Belingwe Belt, Zimbabwe	27	-0.3	Abell et al. (1985)
Ngesi Group (Manjeri Fm)	Belingwe Belt, Zimbabwe	27	0.07	Abell et al. (1985)
Ngesi Group (Manjeri Fm)	Belingwe Belt, Zimbabwe	27	-0.57	Abell et al. (1985)
Ngesi Group (Manjeri Fm)	Belingwe Belt, Zimbabwe	27	-0.15	Abell et al. (1985)
Ngesi Group (Manjeri Fm)	Belingwe Belt, Zimbabwe	27	-1.16	Abell et al. (1985)
Ngesi Group (Manjeri Fm)	Belingwe Belt, Zimbabwe	27	-0.57	Abell et al. (1985)
Ngesi Group (Manjeri Fm)	Belingwe Belt, Zimbabwe	27	-0.27	Abell et al. (1985)
Ngesi Group (Manjeri Fm)	Belingwe Belt, Zimbabwe	27	-0.33	Abell et al. (1985)
Ngesi Group (Manjeri Fm)	Belingwe Belt, Zimbabwe	27	0.04	Abell et al. (1985)
Ngesi Group (Manjeri Fm)	Belingwe Belt, Zimbabwe	27	-0.03	Abell et al. (1985)
Ngesi Group (Manjeri Fm)	Belingwe Belt, Zimbabwe	27	-0.26	Abell et al. (1985)
Ngesi Group (Manjeri Fm)	Belingwe Belt, Zimbabwe	27	-0.17	Abell et al. (1985)
Ngesi Group (Manjeri Fm)	Belingwe Belt, Zimbabwe	27	-0.01	Abell et al. (1985)
Ngesi Group (Manjeri Fm)	Belingwe Belt, Zimbabwe	27	0.11	Abell et al. (1985)
Ngesi Group (Manjeri Fm)	Belingwe Belt, Zimbabwe	27	0.29	Abell et al. (1985)
Ngesi Group (Manjeri Fm)	Belingwe Belt, Zimbabwe	27	-0.12	Abell et al. (1985)
Ngesi Group (Manjeri Fm)	Belingwe Belt, Zimbabwe	27	0.01	Abell et al. (1985)
Ngesi Group (Manjeri Fm)	Belingwe Belt, Zimbabwe	27	0.07	Abell et al. (1985)
Ngesi Group (Manjeri Fm)	Belingwe Belt, Zimbabwe	27	0.1	Abell et al. (1985)
Ngesi Group (Manjeri Fm)	Belingwe Belt, Zimbabwe	27	0.22	Abell et al. (1985)
Ngesi Group (Manjeri Fm)	Belingwe Belt, Zimbabwe	27	-0.43	Abell et al. (1985)
Ngesi Group (Manjeri Fm)	Belingwe Belt, Zimbabwe	27	-0.1	Abell et al. (1985)
Ngesi Group (Manjeri Fm)	Belingwe Belt, Zimbabwe	27	0.22	Abell et al. (1985)
Ngesi Group (Manjeri Fm)	Belingwe Belt, Zimbabwe	27	0.33	Abell et al. (1985)
Ngesi Group (Manjeri Fm)	Belingwe Belt, Zimbabwe	27	-0.1	Abell et al. (1985)
Ngesi Group (Manjeri Fm)	Belingwe Belt, Zimbabwe	27	0.05	Abell et al. (1985)
Ngesi Group (Manjeri Fm)	Belingwe Belt, Zimbabwe	27	-0.62	Abell et al. (1985)
Ngesi Group (Manjeri Fm)	Belingwe Belt, Zimbabwe	27	-0.3	Abell et al. (1985)
Ngesi Group (Manjeri Fm)	Belingwe Belt, Zimbabwe	27	-0.15	Abell et al. (1985)
Ngesi Group (Manjeri Fm)	Belingwe Belt, Zimbabwe	27	0.11	Abell et al. (1985)
Ngesi Group (Manjeri Fm)	Belingwe Belt, Zimbabwe	27	-0.19	Abell et al. (1985)
Ngesi Group (Manjeri Fm)	Belingwe Belt, Zimbabwe	27	-0.13	Abell et al. (1985)
Ngesi Group (Manjeri Fm)	Belingwe Belt, Zimbabwe	27	-0.27	Abell et al. (1985)
Ngesi Group (Manjeri Fm)	Belingwe Belt, Zimbabwe	27	-0.22	Abell et al. (1985)
Ngesi Group (Manjeri Fm)	Belingwe Belt, Zimbabwe	27	-0.89	Abell et al. (1985)
Ngesi Group (Manjeri Fm)	Belingwe Belt, Zimbabwe	27	-0.76	Abell et al. (1985)
Ngesi Group (Manjeri Fm)	Belingwe Belt, Zimbabwe	27	0.01	Abell et al. (1985)
Ngesi Group (Manjeri Fm)	Belingwe Belt, Zimbabwe	27	-0.23	Abell et al. (1985)
Ngesi Group (Manjeri Fm)	Belingwe Belt, Zimbabwe	27	-0.2	Abell et al. (1985)
Ngesi Group (Manjeri Fm)	Belingwe Belt, Zimbabwe	27	-0.02	Abell et al. (1985)
Ngesi Group (Manjeri Fm)	Belingwe Belt, Zimbabwe	27	0.04	Abell et al. (1985)
Ngesi Group (Manjeri Fm)	Belingwe Belt, Zimbabwe	27	-0.1	Abell et al. (1985)
Ngesi Group (Manjeri Fm)	Belingwe Belt, Zimbabwe	27	-0.21	Abell et al. (1985)
Ngesi Group (Manjeri Fm)	Belingwe Belt, Zimbabwe	27	0.04	Abell et al. (1985)
Ngesi Group (Manjeri Fm)	Belingwe Belt, Zimbabwe	27	-0.15	Abell et al. (1985)
Ngesi Group (Manjeri Fm)	Belingwe Belt, Zimbabwe	27	-0.11	Abell et al. (1985)
Ngesi Group (Manjeri Fm)	Belingwe Belt, Zimbabwe	27	-0.16	Abell et al. (1985)
Ngesi Group (Manjeri Fm)	Belingwe Belt, Zimbabwe	27	-0.23	Abell et al. (1985)
Ngesi Group (Manjeri Fm)	Belingwe Belt, Zimbabwe	27	-0.16	Abell et al. (1985)
Ngesi Group (Manjeri Fm)	Belingwe Belt, Zimbabwe	27	-0.27	Abell et al. (1985)
Ngesi Group (Manjeri Fm)	Belingwe Belt, Zimbabwe	27	0.28	Abell et al. (1985)
Ngesi Group (Manjeri Fm)	Belingwe Belt, Zimbabwe	27	-0.27	Abell et al. (1985)
Ngesi Group (Manjeri Fm)	Belingwe Belt, Zimbabwe	27	0	Abell et al. (1985)
Ngesi Group (Manjeri Fm)	Belingwe Belt, Zimbabwe	27	-0.03	Abell et al. (1985)
Ngesi Group (Manjeri Fm)	Belingwe Belt, Zimbabwe	27	0.01	Abell et al. (1985)
Ngesi Group (Manjeri Fm)	Belingwe Belt, Zimbabwe	27	0.14	Abell et al. (1985)
Ngesi Group (Manjeri Fm)	Belingwe Belt, Zimbabwe	27	0.18	Abell et al. (1985)
Ngesi Group (Manjeri Fm)	Belingwe Belt, Zimbabwe	27	-0.28	Abell et al. (1985)
Ngesi Group (Manjeri Fm)	Belingwe Belt, Zimbabwe	27	-0.15	Abell et al. (1985)
Ngesi Group (Manjeri Fm)	Belingwe Belt, Zimbabwe	27	0.4	Abell et al. (1985)
Ngesi Group (Manjeri Fm)	Belingwe Belt, Zimbabwe	27	-0.39	Abell et al. (1985)
Ngesi Group (Manjeri Fm)	Belingwe Belt, Zimbabwe	27	0	Abell et al. (1985)
Ngesi Group (Manjeri Fm)	Belingwe Belt, Zimbabwe	27	-0.28	Abell et al. (1985)
Ngesi Group (Manjeri Fm)	Belingwe Belt, Zimbabwe	27	-0.59	Abell et al. (1985)
Ngesi Group (Manjeri Fm)	Belingwe Belt, Zimbabwe	27	0.35	Abell et al. (1985)
Ngesi Group (Manjeri Fm)	Belingwe Belt, Zimbabwe	27	0.03	Abell et al. (1985)
Ngesi Group (Manjeri Fm)	Belingwe Belt, Zimbabwe	27	-0.29	Abell et al. (1985)
Ngesi Group (Manjeri Fm)	Belingwe Belt, Zimbabwe	27	0.28	Abell et al. (1985)
Ngesi Group (Manjeri Fm)	Belingwe Belt, Zimbabwe	27	-0.3	Abell et al. (1985)
Ngesi Group (Manjeri Fm)	Belingwe Belt, Zimbabwe	27	-0.22	Abell et al. (1985)
Ngesi Group (Manjeri Fm)	Belingwe Belt, Zimbabwe	27	-0.04	Abell et al. (1985)
Ngesi Group (Manjeri Fm)	Belingwe Belt, Zimbabwe	27	-0.13	Abell et al. (1985)
Ngesi Group (Manjeri Fm)	Belingwe Belt, Zimbabwe	27	0.02	Abell et al. (1985)
Ngesi Group (Manjeri Fm)	Belingwe Belt, Zimbabwe	27	0.45	Abell et al. (1985)
Ngesi Group (Manjeri Fm)	Belingwe Belt, Zimbabwe	27	0.05	Abell et al. (1985)
Ngesi Group (Manjeri Fm)	Belingwe Belt, Zimbabwe	27	-0.08	Abell et al. (1985)
Ngesi Group (Manjeri Fm)	Belingwe Belt, Zimbabwe	27	-0.08	Abell et al. (1985)
Ngesi Group (Manjeri Fm)	Belingwe Belt, Zimbabwe	27	0.4	Abell et al. (1985)
Ngesi Group (Manjeri Fm)	Belingwe Belt, Zimbabwe	27	0.58	Abell et al. (1985)
Ngesi Group (Manjeri Fm)	Belingwe Belt, Zimbabwe	27	-0.22	Abell et al. (1985)
Ngesi Group (Manjeri Fm)	Belingwe Belt, Zimbabwe	27	-0.14	Abell et al. (1985)
Ngesi Group (Manjeri Fm)	Belingwe Belt, Zimbabwe	27	0.31	Abell et al. (1985)
Ngesi Group (Manjeri Fm)	Belingwe Belt, Zimbabwe	27	-0.18	Abell et al. (1985)
Ngesi Group (Manjeri Fm)	Belingwe Belt, Zimbabwe	27	0.07	Abell et al. (1985)
Ngesi Group (Manjeri Fm)	Belingwe Belt, Zimbabwe	27	-0.06	Abell et al. (1985)
Ngesi Group (Manjeri Fm)	Belingwe Belt, Zimbabwe	27	-0.09	Abell et al. (1985)
Ngesi Group (Manjeri Fm)	Belingwe Belt, Zimbabwe	27	0.11	Abell et al. (1985)
Ngesi Group (Manjeri Fm)	Belingwe Belt, Zimbabwe	27	0.08	Abell et al. (1985)
Ngesi Group (Manjeri Fm)	Belingwe Belt, Zimbabwe	27	-0.11	Abell et al. (1985)
Ngesi Group (Manjeri Fm)	Belingwe Belt, Zimbabwe	27	0.03	Abell et al. (1985)
Ngesi Group (Manjeri Fm)	Belingwe Belt, Zimbabwe	27	0.12	Abell et al. (1985)
Ngesi Group (Manjeri Fm)	Belingwe Belt, Zimbabwe	27	0.04	Abell et al. (1985)
Ngesi Group (Manjeri Fm)	Belingwe Belt, Zimbabwe	27	0.21	Abell et al. (1985)
Fortescue Group (Tumbiana Fm)	Hamersley Basin	27	0.5	Schidlowski et al. (1983)
Fortescue Group (Tumbiana Fm)	Hamersley Basin	27	-1.7	Schidlowski et al. (1983)
Fortescue Group (Tumbiana Fm)	Hamersley Basin	27	-1.3	Schidlowski et al. (1983)
Fortescue Group (Tumbiana Fm)	Hamersley Basin	27	-1	Schidlowski et al. (1983)
Fortescue Group (Tumbiana Fm)	Hamersley Basin	27	-0.5	Schidlowski et al. (1983)
Fortescue Group (Tumbiana Fm)	Hamersley Basin	27	-0.2	Schidlowski et al. (1983)
Fortescue Group (Tumbiana Fm)	Hamersley Basin	27	0.2	Schidlowski et al. (1983)
Fortescue Group (Tumbiana Fm)	Hamersley Basin	27	0.6	Schidlowski et al. (1983)
Fortescue Group (Tumbiana Fm)	Hamersley Basin	27	0.7	Schidlowski et al. (1983)
Fortescue Group (Tumbiana Fm)	Hamersley Basin	27	0.7	Schidlowski et al. (1983)
Fortescue Group (Tumbiana Fm)	Hamersley Basin	27	0.8	Schidlowski et al. (1983)
Fortescue Group (Tumbiana Fm)	Hamersley Basin	27	-4.01	Veizer et al. (1990)
Fortescue Group (Tumbiana Fm)	Hamersley Basin	27	-3.23	Veizer et al. (1990)
Fortescue Group (Tumbiana Fm)	Hamersley Basin	27	-2.48	Veizer et al. (1990)
Fortescue Group (Tumbiana Fm)	Hamersley Basin	27	-2.06	Veizer et al. (1990)
Fortescue Group (Tumbiana Fm)	Hamersley Basin	27	-9.43	Veizer et al. (1990)
Fortescue Group (Tumbiana Fm)	Hamersley Basin	27	-4.2	Thomazo et al. (2009)
Fortescue Group (Tumbiana Fm)	Hamersley Basin	27	-9.2	Thomazo et al. (2009)
Fortescue Group (Tumbiana Fm)	Hamersley Basin	27	-7.7	Thomazo et al. (2009)
Fortescue Group (Tumbiana Fm)	Hamersley Basin	27	-6.1	Thomazo et al. (2009)
Fortescue Group (Tumbiana Fm)	Hamersley Basin	27	1	Thomazo et al. (2009)
Fortescue Group (Tumbiana Fm)	Hamersley Basin	27	0	Thomazo et al. (2009)
Fortescue Group (Tumbiana Fm)	Hamersley Basin	27	0.4	Thomazo et al. (2009)
Fortescue Group (Tumbiana Fm)	Hamersley Basin	27	0.9	Thomazo et al. (2009)
Fortescue Group (Tumbiana Fm)	Hamersley Basin	27	0.8	Thomazo et al. (2009)
Fortescue Group (Tumbiana Fm)	Hamersley Basin	27	0.6	Thomazo et al. (2009)
Fortescue Group (Tumbiana Fm)	Hamersley Basin	27	0	Thomazo et al. (2009)
Fortescue Group (Tumbiana Fm)	Hamersley Basin	27	1.1	Thomazo et al. (2009)
Fortescue Group (Tumbiana Fm)	Hamersley Basin	27	0.8	Thomazo et al. (2009)
Fortescue Group (Tumbiana Fm)	Hamersley Basin	27	0.3	Thomazo et al. (2009)
Fortescue Group (Tumbiana Fm)	Hamersley Basin	27	0.8	Thomazo et al. (2009)
Fortescue Group (Tumbiana Fm)	Hamersley Basin	27	1.9	Thomazo et al. (2009)
Fortescue Group (Tumbiana Fm)	Hamersley Basin	27	1.3	Thomazo et al. (2009)
Fortescue Group (Tumbiana Fm)	Hamersley Basin	27	1.1	Thomazo et al. (2009)
Fortescue Group (Tumbiana Fm)	Hamersley Basin	27	1.2	Thomazo et al. (2009)
Fortescue Group (Tumbiana Fm)	Hamersley Basin	27	1.3	Thomazo et al. (2009)
Fortescue Group (Tumbiana Fm)	Hamersley Basin	27	0.9	Thomazo et al. (2009)
Fortescue Group (Tumbiana Fm)	Hamersley Basin	27	1.6	Thomazo et al. (2009)
Fortescue Group (Tumbiana Fm)	Hamersley Basin	27	1.4	Thomazo et al. (2009)
Fortescue Group (Tumbiana Fm)	Hamersley Basin	27	0.8	Thomazo et al. (2009)
Fortescue Group (Tumbiana Fm)	Hamersley Basin	27	1.1	Thomazo et al. (2009)
Fortescue Group (Tumbiana Fm)	Hamersley Basin	27	0.4	Thomazo et al. (2009)
Fortescue Group (Tumbiana Fm)	Hamersley Basin	27	-1.9	Thomazo et al. (2009)
Fortescue Group (Tumbiana Fm)	Hamersley Basin	27	-1.2	Thomazo et al. (2009)
Fortescue Group (Tumbiana Fm)	Hamersley Basin	27	-1.9	Thomazo et al. (2009)
Fortescue Group (Tumbiana Fm)	Hamersley Basin	27	-2.2	Thomazo et al. (2009)
Fortescue Group (Tumbiana Fm)	Hamersley Basin	27	-0.7	Thomazo et al. (2009)
Fortescue Group (Tumbiana Fm)	Hamersley Basin	27	-2	Thomazo et al. (2009)
Fortescue Group (Tumbiana Fm)	Hamersley Basin	27	-1.3	Thomazo et al. (2009)
Fortescue Group (Tumbiana Fm)	Hamersley Basin	27	-0.5	Thomazo et al. (2009)
Fortescue Group (Tumbiana Fm)	Hamersley Basin	27	-0.2	Thomazo et al. (2009)
Fortescue Group (Tumbiana Fm)	Hamersley Basin	27	-1.8	Thomazo et al. (2009)
Fortescue Group (Tumbiana Fm)	Hamersley Basin	27	-1.1	Thomazo et al. (2009)
Fortescue Group (Tumbiana Fm)	Hamersley Basin	27	-0.6	Thomazo et al. (2009)
Fortescue Group (Tumbiana Fm)	Hamersley Basin	27	-0.7	Thomazo et al. (2009)
Fortescue Group (Tumbiana Fm)	Hamersley Basin	27	-1	Thomazo et al. (2009)
Fortescue Group (Kylena Fm)	Hamersley Basin	27	1.2	Flannery et al. (2014)
Fortescue Group (Kylena Fm)	Hamersley Basin	27	-5.6	Flannery et al. (2014)
Fortescue Group (Kylena Fm)	Hamersley Basin	27	2.1	Flannery et al. (2014)
Fortescue Group (Kylena Fm)	Hamersley Basin	27	-2.8	Flannery et al. (2014)
Fortescue Group (Kylena Fm)	Hamersley Basin	27	-2.6	Flannery et al. (2014)
Fortescue Group (Kylena Fm)	Hamersley Basin	27	0.8	Flannery et al. (2014)
Fortescue Group (Kylena Fm)	Hamersley Basin	27	-1.6	Flannery et al. (2014)
Fortescue Group (Kylena Fm)	Hamersley Basin	27	0.7	Flannery et al. (2014)
Fortescue Group (Kylena Fm)	Hamersley Basin	27	1.5	Flannery et al. (2014)
Fortescue Group (Kylena Fm)	Hamersley Basin	27	1.8	Flannery et al. (2014)
Fortescue Group (Kylena Fm)	Hamersley Basin	27	-0.1	Flannery et al. (2014)
Fortescue Group (Kylena Fm)	Hamersley Basin	27	1.7	Flannery et al. (2014)
Fortescue Group (Kylena Fm)	Hamersley Basin	27	1.8	Flannery et al. (2014)
Abitibi Greenstone Belt	Larder Lake, Ontario	27	-0.84	Veizer et al. (1989)
Abitibi Greenstone Belt	Larder Lake, Ontario	27	-1.1	Veizer et al. (1989)
Abitibi Greenstone Belt	Larder Lake, Ontario	27	-0.77	Veizer et al. (1989)
Abitibi Greenstone Belt	Larder Lake, Ontario	27	-0.69	Veizer et al. (1989)
Abitibi Greenstone Belt	Larder Lake, Ontario	27	-0.97	Veizer et al. (1989)
Abitibi Greenstone Belt	Larder Lake, Ontario	27	-0.58	Veizer et al. (1989)
Abitibi Greenstone Belt	Larder Lake, Ontario	27	-0.55	Veizer et al. (1989)
Abitibi Greenstone Belt	Larder Lake, Ontario	27	-0.18	Veizer et al. (1989)
Abitibi Greenstone Belt	Larder Lake, Ontario	27	-0.27	Veizer et al. (1989)
Abitibi Greenstone Belt	Larder Lake, Ontario	27	-1.39	Veizer et al. (1989)
Abitibi Greenstone Belt	Larder Lake, Ontario	27	-1.7	Veizer et al. (1989)
Abitibi Greenstone Belt	Larder Lake, Ontario	27	-1.39	Veizer et al. (1989)
Abitibi Greenstone Belt	Larder Lake, Ontario	27	-1.32	Veizer et al. (1989)
Abitibi Greenstone Belt	Larder Lake, Ontario	27	-1.82	Veizer et al. (1989)
Abitibi Greenstone Belt	Larder Lake, Ontario	27	-1.62	Veizer et al. (1989)
Abitibi Greenstone Belt	Larder Lake, Ontario	27	-1.23	Veizer et al. (1989)
Abitibi Greenstone Belt	Larder Lake, Ontario	27	-2.15	Veizer et al. (1989)
Abitibi Greenstone Belt	Larder Lake, Ontario	27	-0.1	Veizer et al. (1989)
Abitibi Greenstone Belt	Larder Lake, Ontario	27	-0.3	Veizer et al. (1989)
Abitibi Greenstone Belt	Larder Lake, Ontario	27	-0.2	Veizer et al. (1989)
Abitibi Greenstone Belt	Larder Lake, Ontario	27	-2.37	Veizer et al. (1989)
Abitibi Greenstone Belt	Larder Lake, Ontario	27	-1.92	Veizer et al. (1989)
Abitibi Greenstone Belt	Larder Lake, Ontario	27	-4.56	Veizer et al. (1989)
Abitibi Greenstone Belt	Larder Lake, Ontario	27	-4.41	Veizer et al. (1989)
Abitibi Greenstone Belt	Larder Lake, Ontario	27	-4.85	Veizer et al. (1989)
Abitibi Greenstone Belt	Larder Lake, Ontario	27	-5.76	Veizer et al. (1989)
Abitibi Greenstone Belt	Larder Lake, Ontario	27	-4.05	Veizer et al. (1989)
Abitibi Greenstone Belt	Larder Lake, Ontario	27	-4.28	Veizer et al. (1989)
Abitibi Greenstone Belt	Larder Lake, Ontario	27	-6.01	Veizer et al. (1989)
Abitibi Greenstone Belt	Larder Lake, Ontario	27	-3.97	Veizer et al. (1989)
Abitibi Greenstone Belt	Larder Lake, Ontario	27	-2.1	Veizer et al. (1989)
Abitibi Greenstone Belt	Larder Lake, Ontario	27	-5.8	Veizer et al. (1989)
Abitibi Greenstone Belt	Larder Lake, Ontario	27	-5	Veizer et al. (1989)
Abitibi Greenstone Belt	Larder Lake, Ontario	27	-5.68	Veizer et al. (1989)
Abitibi Greenstone Belt	Larder Lake, Ontario	27	-2.7	Veizer et al. (1989)
Abitibi Greenstone Belt	Larder Lake, Ontario	27	-6.21	Veizer et al. (1989)
Abitibi Greenstone Belt	Larder Lake, Ontario	27	-4.55	Veizer et al. (1989)
Abitibi Greenstone Belt	Larder Lake, Ontario	27	-2.69	Veizer et al. (1989)
Abitibi Greenstone Belt	Larder Lake, Ontario	27	-4.63	Veizer et al. (1989)
Abitibi Greenstone Belt	Larder Lake, Ontario	27	-2.56	Veizer et al. (1989)
Abitibi Greenstone Belt	Larder Lake, Ontario	27	-3.19	Veizer et al. (1989)
Abitibi Greenstone Belt	Larder Lake, Ontario	27	-4.53	Veizer et al. (1989)
Abitibi Greenstone Belt	Larder Lake, Ontario	27	-3.6	Veizer et al. (1989)
Abitibi Greenstone Belt	Larder Lake, Ontario	27	-4.9	Veizer et al. (1989)
Abitibi Greenstone Belt	Larder Lake, Ontario	27	-3.2	Veizer et al. (1989)
Abitibi Greenstone Belt	Larder Lake, Ontario	27	-3	Veizer et al. (1989)
Abitibi Greenstone Belt	Larder Lake, Ontario	27	-3.15	Veizer et al. (1989)
Abitibi Greenstone Belt	Larder Lake, Ontario	27	-3.78	Veizer et al. (1989)
Abitibi Greenstone Belt	Larder Lake, Ontario	27	-2.17	Veizer et al. (1989)
Abitibi Greenstone Belt	Larder Lake, Ontario	27	-2.01	Veizer et al. (1989)
Abitibi Greenstone Belt	Larder Lake, Ontario	27	-2.15	Veizer et al. (1989)
Steep Rock Lake Group	Wabigoon Belt, Ontario	27	1.42	Veizer et al. (1989)
Steep Rock Lake Group	Wabigoon Belt, Ontario	27	1.92	Veizer et al. (1989)
Steep Rock Lake Group	Wabigoon Belt, Ontario	27	2.22	Veizer et al. (1989)
Steep Rock Lake Group	Wabigoon Belt, Ontario	27	2	Veizer et al. (1989)
Steep Rock Lake Group	Wabigoon Belt, Ontario	27	1.6	Veizer et al. (1989)
Steep Rock Lake Group	Wabigoon Belt, Ontario	27	2.21	Veizer et al. (1989)
Steep Rock Lake Group	Wabigoon Belt, Ontario	27	2.3	Veizer et al. (1989)
Steep Rock Lake Group	Wabigoon Belt, Ontario	27	2.08	Veizer et al. (1989)
Steep Rock Lake Group	Wabigoon Belt, Ontario	27	1.94	Veizer et al. (1989)
Steep Rock Lake Group	Wabigoon Belt, Ontario	27	2.55	Veizer et al. (1989)
Steep Rock Lake Group	Wabigoon Belt, Ontario	27	2.02	Veizer et al. (1989)
Steep Rock Lake Group	Wabigoon Belt, Ontario	27	1.98	Veizer et al. (1989)
Steep Rock Lake Group	Wabigoon Belt, Ontario	27	1.88	Veizer et al. (1989)
Steep Rock Lake Group	Wabigoon Belt, Ontario	27	2.16	Veizer et al. (1989)
Steep Rock Lake Group	Wabigoon Belt, Ontario	27	2	Veizer et al. (1989)
Steep Rock Lake Group	Wabigoon Belt, Ontario	27	2	Veizer et al. (1989)
Steep Rock Lake Group	Wabigoon Belt, Ontario	27	2.12	Veizer et al. (1989)
Steep Rock Lake Group	Wabigoon Belt, Ontario	27	2.4	Veizer et al. (1989)
Steep Rock Lake Group	Wabigoon Belt, Ontario	27	2.34	Veizer et al. (1989)
Steep Rock Lake Group	Wabigoon Belt, Ontario	27	1.96	Veizer et al. (1989)
Steep Rock Lake Group	Wabigoon Belt, Ontario	27	2.2	Veizer et al. (1989)
Steep Rock Lake Group	Wabigoon Belt, Ontario	27	2.23	Veizer et al. (1989)
Steep Rock Lake Group	Wabigoon Belt, Ontario	27	1.66	Veizer et al. (1989)
Steep Rock Lake Group	Wabigoon Belt, Ontario	27	2.58	Veizer et al. (1989)
Steep Rock Lake Group	Wabigoon Belt, Ontario	27	2.5	Veizer et al. (1989)
Steep Rock Lake Group	Wabigoon Belt, Ontario	27	2.49	Veizer et al. (1989)
Steep Rock Lake Group	Wabigoon Belt, Ontario	27	1.77	Veizer et al. (1989)
Steep Rock Lake Group	Wabigoon Belt, Ontario	27	2.38	Veizer et al. (1989)
Steep Rock Lake Group	Wabigoon Belt, Ontario	27	1.9	Veizer et al. (1989)
Steep Rock Lake Group	Wabigoon Belt, Ontario	27	1.53	Veizer et al. (1989)
Steep Rock Lake Group	Wabigoon Belt, Ontario	27	2.01	Veizer et al. (1989)
Steep Rock Lake Group	Wabigoon Belt, Ontario	27	2.37	Veizer et al. (1989)
Steep Rock Lake Group	Wabigoon Belt, Ontario	27	2.4	Veizer et al. (1989)
Steep Rock Lake Group	Wabigoon Belt, Ontario	27	0.97	Veizer et al. (1989)
Steep Rock Lake Group	Wabigoon Belt, Ontario	27	0.75	Veizer et al. (1989)
Steep Rock Lake Group	Wabigoon Belt, Ontario	27	0.8	Veizer et al. (1989)
Steep Rock Lake Group	Wabigoon Belt, Ontario	27	1.97	Veizer et al. (1989)
Steep Rock Lake Group	Wabigoon Belt, Ontario	27	0.89	Veizer et al. (1989)
Steep Rock Lake Group	Wabigoon Belt, Ontario	27	1.32	Veizer et al. (1989)
Steep Rock Lake Group	Wabigoon Belt, Ontario	27	1.8	Veizer et al. (1989)
Steep Rock Lake Group	Wabigoon Belt, Ontario	27	2	Veizer et al. (1989)
Steep Rock Lake Group	Wabigoon Belt, Ontario	27	1.91	Veizer et al. (1989)
Steep Rock Lake Group	Wabigoon Belt, Ontario	27	-3.1	Veizer et al. (1989)
Steep Rock Lake Group	Wabigoon Belt, Ontario	27	2.1	Veizer et al. (1989)
Steep Rock Lake Group	Wabigoon Belt, Ontario	27	1.6	Veizer et al. (1989)
Steep Rock Lake Group	Wabigoon Belt, Ontario	27	2.8	Veizer et al. (1989)
Steep Rock Lake Group	Wabigoon Belt, Ontario	27	2.35	Veizer et al. (1989)
Steep Rock Lake Group	Wabigoon Belt, Ontario	27	-2.65	Veizer et al. (1989)
Steep Rock Lake Group	Wabigoon Belt, Ontario	27	-3.6	Veizer et al. (1989)
Steep Rock Lake Group	Wabigoon Belt, Ontario	27	2.1	Schidlowski et al. (1983)
Steep Rock Lake Group	Wabigoon Belt, Ontario	27	1.1	Schidlowski et al. (1983)
Steep Rock Lake Group	Wabigoon Belt, Ontario	27	1.4	Schidlowski et al. (1983)
Ventersdorp Supergroup	Witwatersrand Basin	27	-6.2	Schidlowski et al. (1983)
Ventersdorp Supergroup	Witwatersrand Basin	27	-5.4	Schidlowski et al. (1983)
Ventersdorp Supergroup	Witwatersrand Basin	27	-3.6	Schidlowski et al. (1983)
Ventersdorp Supergroup	Witwatersrand Basin	27	-3.5	Schidlowski et al. (1983)
Ventersdorp Supergroup	Witwatersrand Basin	27	-2.8	Schidlowski et al. (1983)
Ventersdorp Supergroup	Witwatersrand Basin	27	-2.2	Schidlowski et al. (1983)
Ventersdorp Supergroup	Witwatersrand Basin	27	-1.9	Schidlowski et al. (1983)
Ventersdorp Supergroup	Witwatersrand Basin	27	-1.9	Schidlowski et al. (1983)
Ventersdorp Supergroup	Witwatersrand Basin	27	-1.8	Schidlowski et al. (1983)
Ventersdorp Supergroup	Witwatersrand Basin	27	-2.3	Schidlowski et al. (1983)
Bothaville Fm	Kaapvaal	26	-2.53	Veizer et al. (1990)
Bothaville Fm	Kaapvaal	26	-1.72	Veizer et al. (1990)
Bothaville Fm	Kaapvaal	26	-1.66	Veizer et al. (1990)
Bothaville Fm	Kaapvaal	26	-2.1	Veizer et al. (1990)
Bothaville Fm	Kaapvaal	26	-2.1	Veizer et al. (1990)
Bothaville Fm	Kaapvaal	26	-1.96	Veizer et al. (1990)
Bothaville Fm	Kaapvaal	26	-1.99	Veizer et al. (1990)
Bothaville Fm	Kaapvaal	26	-1.83	Veizer et al. (1990)
Bothaville Fm	Kaapvaal	26	-2.51	Veizer et al. (1990)
Bothaville Fm	Kaapvaal	26	-2.13	Veizer et al. (1990)
Bothaville Fm	Kaapvaal	26	-2.1	Veizer et al. (1990)
Bothaville Fm	Kaapvaal	26	-2.6	Veizer et al. (1990)
Carawine Dolomite	Nullagine, W. Australia	26	-0.3	Veizer et al. (1990)
Carawine Dolomite	Nullagine, W. Australia	26	0.91	Veizer et al. (1990)
Carawine Dolomite	Nullagine, W. Australia	26	-0.23	Veizer et al. (1990)
Carawine Dolomite	Nullagine, W. Australia	26	-1.3	Veizer et al. (1990)
Carawine Dolomite	Nullagine, W. Australia	26	-3.57	Veizer et al. (1990)
Carawine Dolomite	Nullagine, W. Australia	26	0.53	Veizer et al. (1990)
Carawine Dolomite	Nullagine, W. Australia	26	-0.56	Veizer et al. (1990)
Carawine Dolomite	Nullagine, W. Australia	26	0.38	Veizer et al. (1990)
Carawine Dolomite	Nullagine, W. Australia	26	0.42	Veizer et al. (1990)
Carawine Dolomite	Nullagine, W. Australia	26	0.08	Veizer et al. (1990)
Carawine Dolomite	Nullagine, W. Australia	26	0.07	Veizer et al. (1990)
Carawine Dolomite	Nullagine, W. Australia	26	0.57	Veizer et al. (1990)
Carawine Dolomite	Nullagine, W. Australia	26	0.46	Veizer et al. (1990)
Carawine Dolomite	Nullagine, W. Australia	26	0.22	Veizer et al. (1990)
Carawine Dolomite	Nullagine, W. Australia	26	0.38	Veizer et al. (1990)
Carawine Dolomite	Nullagine, W. Australia	26	0.28	Veizer et al. (1990)
Carawine Dolomite	Nullagine, W. Australia	26	0.49	Veizer et al. (1990)
Carawine Dolomite	Nullagine, W. Australia	26	0.37	Veizer et al. (1990)
Carawine Dolomite	Nullagine, W. Australia	26	0.48	Veizer et al. (1990)
Carawine Dolomite	Nullagine, W. Australia	26	0.14	Veizer et al. (1990)
Carawine Dolomite	Nullagine, W. Australia	26	-0.27	Veizer et al. (1990)
Carawine Dolomite	Nullagine, W. Australia	26	-0.77	Veizer et al. (1990)
Carawine Dolomite	Nullagine, W. Australia	26	0.32	Veizer et al. (1990)
Carawine Dolomite	Nullagine, W. Australia	26	0.52	Veizer et al. (1990)
Carawine Dolomite	Nullagine, W. Australia	26	0.65	Veizer et al. (1990)
Carawine Dolomite	Nullagine, W. Australia	26	0.83	Veizer et al. (1990)
Carawine Dolomite	Nullagine, W. Australia	26	-0.1	Veizer et al. (1990)
Carawine Dolomite	Nullagine, W. Australia	26	0.08	Veizer et al. (1990)
Carawine Dolomite	Nullagine, W. Australia	26	0.47	Veizer et al. (1990)
Carawine Dolomite	Nullagine, W. Australia	26	0.29	Veizer et al. (1990)
Bulawayan Gp (Up. Greenschist)	Zimbabwe	26	0.8	Veizer et al. (1989)
Bulawayan Gp (Up. Greenschist)	Zimbabwe	26	0.8	Veizer et al. (1989)
Bulawayan Gp (Up. Greenschist)	Zimbabwe	26	-0.2	Veizer et al. (1989)
Bulawayan Gp (Up. Greenschist)	Zimbabwe	26	-0.5	Veizer et al. (1989)
Bulawayan Gp (Up. Greenschist)	Zimbabwe	26	-0.8	Veizer et al. (1989)
Bulawayan Gp (Up. Greenschist)	Zimbabwe	26	-0.1	Veizer et al. (1989)
Bulawayan Gp (Up. Greenschist)	Zimbabwe	26	1.3	Veizer et al. (1989)
Bulawayan Gp (Up. Greenschist)	Zimbabwe	26	0.01	Veizer et al. (1989)
Bulawayan Gp (Up. Greenschist)	Zimbabwe	26	1.3	Veizer et al. (1989)
Bulawayan Gp (Up. Greenschist)	Zimbabwe	26	0.4	Veizer et al. (1989)
Bulawayan Gp (Up. Greenschist)	Zimbabwe	26	-0.1	Veizer et al. (1989)
Bulawayan Gp (Up. Greenschist)	Zimbabwe	26	-0.4	Veizer et al. (1989)
Bulawayan Gp (Up. Greenschist)	Zimbabwe	26	1.3	Veizer et al. (1989)
Bulawayan Gp (Up. Greenschist)	Zimbabwe	26	0.2	Veizer et al. (1989)
Bulawayan Gp (Up. Greenschist)	Zimbabwe	26	1.3	Veizer et al. (1989)
Chitradurga Group	Dharwar Craton	25	-0.7	Kumar et al. (1983)
Chitradurga Group	Dharwar Craton	25	-0.2	Kumar et al. (1983)
Chitradurga Group	Dharwar Craton	25	-0.5	Kumar et al. (1983)
Chitradurga Group	Dharwar Craton	25	0	Kumar et al. (1983)
Chitradurga Group	Dharwar Craton	25	0.2	Kumar et al. (1983)
Chitradurga Group	Dharwar Craton	25	-0.3	Kumar et al. (1983)
Chitradurga Group	Dharwar Craton	25	0	Kumar et al. (1983)
Chitradurga Group	Dharwar Craton	25	-0.6	Kumar et al. (1983)
Chitradurga Group	Dharwar Craton	25	0.2	Kumar et al. (1983)
Chitradurga Group	Dharwar Craton	25	-0.6	Kumar et al. (1983)
Chitradurga Group	Dharwar Craton	25	0.1	Kumar et al. (1983)
Chitradurga Group	Dharwar Craton	25	0	Kumar et al. (1983)
Chitradurga Group	Dharwar Craton	25	0	Kumar et al. (1983)
Chitradurga Group	Dharwar Craton	25	0.3	Kumar et al. (1983)
Eccles Fm	Campbellrand	25	0.4	Eroglu et al. (2017)
Eccles Fm	Campbellrand	25	0	Eroglu et al. (2017)
Eccles Fm	Campbellrand	25	0.1	Eroglu et al. (2017)
Eccles Fm	Campbellrand	25	0.1	Eroglu et al. (2017)
Eccles Fm	Campbellrand	25	0	Eroglu et al. (2017)
Eccles Fm	Campbellrand	25	0.3	Eroglu et al. (2017)
Eccles Fm	Campbellrand	25	0.1	Eroglu et al. (2017)
Eccles Fm	Campbellrand	25	0	Eroglu et al. (2017)
Eccles Fm	Campbellrand	25	0	Eroglu et al. (2017)
Eccles Fm	Campbellrand	25	0	Eroglu et al. (2017)
Eccles Fm	Campbellrand	25	0.2	Eroglu et al. (2017)
Eccles Fm	Campbellrand	25	0	Eroglu et al. (2017)
Eccles Fm	Campbellrand	25	0.3	Eroglu et al. (2017)
Eccles Fm	Campbellrand	25	0.1	Eroglu et al. (2017)
Eccles Fm	Campbellrand	25	0.2	Eroglu et al. (2017)
Eccles Fm	Campbellrand	25	-0.2	Eroglu et al. (2017)
Eccles Fm	Campbellrand	25	-0.1	Eroglu et al. (2017)
Eccles Fm	Campbellrand	25	0.1	Eroglu et al. (2017)
Eccles Fm	Campbellrand	25	-0.2	Eroglu et al. (2017)
Eccles Fm	Campbellrand	25	0	Eroglu et al. (2017)
Eccles Fm	Campbellrand	25	0.3	Eroglu et al. (2017)
Eccles Fm	Campbellrand	25	0	Eroglu et al. (2017)
Eccles Fm	Campbellrand	25	0	Eroglu et al. (2017)
Eccles Fm	Campbellrand	25	0.1	Eroglu et al. (2017)
Eccles Fm	Campbellrand	25	0	Eroglu et al. (2017)
Eccles Fm	Campbellrand	25	0	Eroglu et al. (2017)
Eccles Fm	Campbellrand	25	0.1	Eroglu et al. (2017)
Eccles Fm	Campbellrand	25	-0.1	Eroglu et al. (2017)
Eccles Fm	Campbellrand	25	-0.3	Eroglu et al. (2017)
Eccles Fm	Campbellrand	25	-0.1	Eroglu et al. (2017)
Eccles Fm	Campbellrand	25	-0.2	Eroglu et al. (2017)
Eccles Fm	Campbellrand	25	0.1	Eroglu et al. (2017)
Eccles Fm	Campbellrand	25	-0.5	Eroglu et al. (2017)
Eccles Fm	Campbellrand	25	-0.6	Eroglu et al. (2017)
Lyttleton Fm	Campbellrand	25	-0.1	Eroglu et al. (2017)
Lyttleton Fm	Campbellrand	25	-0.3	Eroglu et al. (2017)
Lyttleton Fm	Campbellrand	25	-0.3	Eroglu et al. (2017)
Lyttleton Fm	Campbellrand	25	-0.7	Eroglu et al. (2017)
Lyttleton Fm	Campbellrand	25	-0.6	Eroglu et al. (2017)
Montecristo Fm	Campbellrand	25	-0.3	Eroglu et al. (2017)
Montecristo Fm	Campbellrand	25	0	Eroglu et al. (2017)
Montecristo Fm	Campbellrand	25	0.1	Eroglu et al. (2017)
Montecristo Fm	Campbellrand	25	-0.2	Eroglu et al. (2017)
Montecristo Fm	Campbellrand	25	-0.9	Eroglu et al. (2017)
Montecristo Fm	Campbellrand	25	-0.2	Eroglu et al. (2017)
Montecristo Fm	Campbellrand	25	-0.4	Eroglu et al. (2017)
Montecristo Fm	Campbellrand	25	-0.6	Eroglu et al. (2017)
Montecristo Fm	Campbellrand	25	-3.2	Eroglu et al. (2017)
Montecristo Fm	Campbellrand	25	-0.4	Eroglu et al. (2017)
Montecristo Fm	Campbellrand	25	-0.5	Eroglu et al. (2017)
Montecristo Fm	Campbellrand	25	-0.7	Eroglu et al. (2017)
Montecristo Fm	Campbellrand	25	-0.6	Eroglu et al. (2017)
Montecristo Fm	Campbellrand	25	-0.6	Eroglu et al. (2017)
Montecristo Fm	Campbellrand	25	-0.6	Eroglu et al. (2017)
Montecristo Fm	Campbellrand	25	-0.7	Eroglu et al. (2017)
Montecristo Fm	Campbellrand	25	-0.5	Eroglu et al. (2017)
Montecristo Fm	Campbellrand	25	-0.6	Eroglu et al. (2017)
Montecristo Fm	Campbellrand	25	-0.7	Eroglu et al. (2017)
Montecristo Fm	Campbellrand	25	-0.6	Eroglu et al. (2017)
Montecristo Fm	Campbellrand	25	-0.4	Eroglu et al. (2017)
Montecristo Fm	Campbellrand	25	-0.4	Eroglu et al. (2017)
Montecristo Fm	Campbellrand	25	-0.5	Eroglu et al. (2017)
Montecristo Fm	Campbellrand	25	-0.5	Eroglu et al. (2017)
Montecristo Fm	Campbellrand	25	-0.2	Eroglu et al. (2017)
Montecristo Fm	Campbellrand	25	-0.6	Eroglu et al. (2017)
Montecristo Fm	Campbellrand	25	-0.5	Eroglu et al. (2017)
Montecristo Fm	Campbellrand	25	-0.6	Eroglu et al. (2017)
Montecristo Fm	Campbellrand	25	-0.9	Eroglu et al. (2017)
Montecristo Fm	Campbellrand	25	-0.6	Eroglu et al. (2017)
Montecristo Fm	Campbellrand	25	-0.5	Eroglu et al. (2017)
Montecristo Fm	Campbellrand	25	-0.4	Eroglu et al. (2017)
Montecristo Fm	Campbellrand	25	-1	Eroglu et al. (2017)
Montecristo Fm	Campbellrand	25	-0.8	Eroglu et al. (2017)
Montecristo Fm	Campbellrand	25	-0.6	Eroglu et al. (2017)
Montecristo Fm	Campbellrand	25	-0.7	Eroglu et al. (2017)
Montecristo Fm	Campbellrand	25	-0.7	Eroglu et al. (2017)
Montecristo Fm	Campbellrand	25	-1	Eroglu et al. (2017)
Montecristo Fm	Campbellrand	25	-0.6	Eroglu et al. (2017)
Montecristo Fm	Campbellrand	25	-0.5	Eroglu et al. (2017)
Montecristo Fm	Campbellrand	25	-0.5	Eroglu et al. (2017)
Montecristo Fm	Campbellrand	25	-0.6	Eroglu et al. (2017)
Montecristo Fm	Campbellrand	25	-0.6	Eroglu et al. (2017)
Montecristo Fm	Campbellrand	25	-0.6	Eroglu et al. (2017)
Montecristo Fm	Campbellrand	25	-0.6	Eroglu et al. (2017)
Montecristo Fm	Campbellrand	25	-0.6	Eroglu et al. (2017)
Montecristo Fm	Campbellrand	25	-0.7	Eroglu et al. (2017)
Montecristo Fm	Campbellrand	25	-1.2	Eroglu et al. (2017)
Montecristo Fm	Campbellrand	25	-0.5	Eroglu et al. (2017)
Montecristo Fm	Campbellrand	25	-0.6	Eroglu et al. (2017)
Montecristo Fm	Campbellrand	25	-0.9	Eroglu et al. (2017)
Montecristo Fm	Campbellrand	25	-0.8	Eroglu et al. (2017)
Montecristo Fm	Campbellrand	25	-0.8	Eroglu et al. (2017)
Montecristo Fm	Campbellrand	25	-0.6	Eroglu et al. (2017)
Montecristo Fm	Campbellrand	25	-0.8	Eroglu et al. (2017)
Gamohaan Fm	Campbellrand	25	-0.1	Eroglu et al. (2017)
Gamohaan Fm	Campbellrand	25	0.1	Eroglu et al. (2017)
Kogelbeen Fn	Campbellrand	25	-0.7	Eroglu et al. (2017)
Kogelbeen Fn	Campbellrand	25	-0.8	Eroglu et al. (2017)
Kogelbeen Fn	Campbellrand	25	-0.2	Eroglu et al. (2017)
Papkuil Fm	Campbellrand	25	-0.4	Eroglu et al. (2017)
Papkuil Fm	Campbellrand	25	-0.6	Eroglu et al. (2017)
Papkuil Fm	Campbellrand	25	-0.1	Eroglu et al. (2017)
Papkuil Fm	Campbellrand	25	-0.6	Eroglu et al. (2017)
Fairfield Fm	Campbellrand	25	-0.5	Eroglu et al. (2017)
Fairfield Fm	Campbellrand	25	-0.8	Eroglu et al. (2017)
Fairfield Fm	Campbellrand	25	-0.5	Eroglu et al. (2017)
Kamden Fm	Campbellrand	25	-1.3	Eroglu et al. (2017)
Reivilo Fm	Campbellrand	25	-0.4	Eroglu et al. (2017)
Reivilo Fm	Campbellrand	25	-0.3	Eroglu et al. (2017)
Reivilo Fm	Campbellrand	25	-0.9	Eroglu et al. (2017)
Reivilo Fm	Campbellrand	25	-0.2	Eroglu et al. (2017)
Reivilo Fm	Campbellrand	25	-0.3	Eroglu et al. (2017)
Reivilo Fm	Campbellrand	25	-0.5	Eroglu et al. (2017)
Reivilo Fm	Campbellrand	25	-0.4	Eroglu et al. (2017)
Reivilo Fm	Campbellrand	25	-1	Eroglu et al. (2017)
Reivilo Fm	Campbellrand	25	-1.1	Eroglu et al. (2017)
Reivilo Fm	Campbellrand	25	-0.7	Eroglu et al. (2017)
Reivilo Fm	Campbellrand	25	-0.9	Eroglu et al. (2017)
Campbellrand	Campbellrand	25	0.48	Paris et al. (2014)
Campbellrand	Campbellrand	25	0.93	Paris et al. (2014)
Campbellrand	Campbellrand	25	0.15	Paris et al. (2014)
Campbellrand	Campbellrand	25	0.62	Paris et al. (2014)
Campbellrand	Campbellrand	25	0.28	Paris et al. (2014)
Campbellrand	Campbellrand	25	-0.34	Paris et al. (2014)
Campbellrand	Campbellrand	25	-0.65	Paris et al. (2014)
Campbellrand	Campbellrand	25	-0.73	Paris et al. (2014)
Campbellrand	Campbellrand	25	-0.71	Paris et al. (2014)
Campbellrand	Campbellrand	25	-0.72	Paris et al. (2014)
Campbellrand	Campbellrand	25	-0.71	Paris et al. (2014)
Campbellrand	Campbellrand	25	-0.15	Paris et al. (2014)
Campbellrand	Campbellrand	25	-0.13	Paris et al. (2014)
Campbellrand	Campbellrand	25	0.21	Paris et al. (2014)
Campbellrand	Campbellrand	25	-1	Paris et al. (2014)
Campbellrand	Campbellrand	25	-0.92	Paris et al. (2014)
Campbellrand	Campbellrand	25	-1.03	Paris et al. (2014)
Campbellrand	Campbellrand	25	-1.09	Paris et al. (2014)
Campbellrand	Campbellrand	25	-1.08	Paris et al. (2014)
Campbellrand	Campbellrand	25	-0.89	Paris et al. (2014)
Campbellrand	Campbellrand	25	-0.93	Paris et al. (2014)
Campbellrand	Campbellrand	25	-0.84	Paris et al. (2014)
Campbellrand	Campbellrand	25	-0.88	Paris et al. (2014)
Campbellrand	Campbellrand	25	-0.73	Paris et al. (2014)
Campbellrand	Campbellrand	25	-0.62	Paris et al. (2014)
Campbellrand	Campbellrand	25	-1.08	Paris et al. (2014)
Campbellrand	Campbellrand	25	-0.15	Paris et al. (2014)
Campbellrand	Campbellrand	25	-0.18	Paris et al. (2014)
Campbellrand	Campbellrand	25	0.08	Paris et al. (2014)
Campbellrand	Campbellrand	25	-0.11	Paris et al. (2014)
Campbellrand	Campbellrand	25	-1.15	Paris et al. (2014)
Campbellrand	Campbellrand	25	-0.82	Paris et al. (2014)
Campbellrand	Campbellrand	25	-0.71	Paris et al. (2014)
Campbellrand	Campbellrand	25	-0.96	Paris et al. (2014)
Campbellrand	Campbellrand	25	-1.03	Paris et al. (2014)
Campbellrand	Campbellrand	25	-1.07	Paris et al. (2014)
Campbellrand	Campbellrand	25	-0.98	Paris et al. (2014)
Campbellrand	Campbellrand	25	-1.03	Paris et al. (2014)
Campbellrand	Campbellrand	25	-0.98	Paris et al. (2014)
Campbellrand	Campbellrand	25	-0.56	Paris et al. (2014)
Campbellrand	Campbellrand	25	-0.61	Paris et al. (2014)
Campbellrand	Campbellrand	25	-0.64	Paris et al. (2014)
Campbellrand	Campbellrand	25	-0.89	Paris et al. (2014)
Campbellrand	Campbellrand	25	-1.01	Paris et al. (2014)
Ghaap Gp	Griqualand West	25	-1.01	Xu (2011)
Ghaap Gp	Griqualand West	25	-0.2	Xu (2011)
Ghaap Gp	Griqualand West	25	0.4	Xu (2011)
Ghaap Gp	Griqualand West	25	-0.5	Xu (2011)
Ghaap Gp	Griqualand West	25	-0.3	Xu (2011)
Ghaap Gp	Griqualand West	25	0.1	Xu (2011)
Ghaap Gp	Griqualand West	25	-2.4	Xu (2011)
Ghaap Gp	Griqualand West	25	-0.3	Xu (2011)
Ghaap Gp	Griqualand West	25	-1.1	Xu (2011)
Ghaap Gp	Griqualand West	25	0.1	Xu (2011)
Ghaap Gp	Griqualand West	25	-0.2	Xu (2011)
Ghaap Gp	Griqualand West	25	-0.9	Xu (2011)
Ghaap Gp	Griqualand West	25	-0.7	Xu (2011)
Ghaap Gp	Griqualand West	25	-0.9	Xu (2011)
Ghaap Gp	Griqualand West	25	-0.4	Xu (2011)
Ghaap Gp	Griqualand West	25	-0.4	Xu (2011)
Ghaap Gp	Griqualand West	25	-0.7	Xu (2011)
Ghaap Gp	Griqualand West	25	-0.3	Xu (2011)
Ghaap Gp	Griqualand West	25	-0.2	Xu (2011)
Ghaap Gp	Griqualand West	25	-0.5	Xu (2011)
Ghaap Gp	Griqualand West	25	-0.6	Xu (2011)
Ghaap Gp	Griqualand West	25	-0.7	Xu (2011)
Ghaap Gp	Griqualand West	25	-0.5	Xu (2011)
Ghaap Gp	Griqualand West	25	-1.3	Xu (2011)
Ghaap Gp	Griqualand West	25	-0.2	Xu (2011)
Ghaap Gp	Griqualand West	25	-0.3	Xu (2011)
Ghaap Gp	Griqualand West	25	-1	Xu (2011)
Ghaap Gp	Griqualand West	25	-0.5	Xu (2011)
Ghaap Gp	Griqualand West	25	-0.6	Xu (2011)
Ghaap Gp	Griqualand West	25	-0.7	Xu (2011)
Ghaap Gp	Griqualand West	25	-1.7	Xu (2011)
Ghaap Gp	Griqualand West	25	-1.2	Xu (2011)
Ghaap Gp	Griqualand West	25	-0.3	Xu (2011)
Ghaap Gp	Griqualand West	25	-0.3	Xu (2011)
Ghaap Gp	Griqualand West	25	-0.1	Xu (2011)
Ghaap Gp	Griqualand West	25	-0.2	Xu (2011)
Ghaap Gp	Griqualand West	25	-0.5	Xu (2011)
Ghaap Gp	Griqualand West	25	0.2	Xu (2011)
Ghaap Gp	Griqualand West	25	0	Xu (2011)
Ghaap Gp	Griqualand West	25	0	Xu (2011)
Wiitenoom Dolomite	Hamersley Basin	25	-0.1	Schidlowski et al. (1983)
Wiitenoom Dolomite	Hamersley Basin	25	-0.1	Schidlowski et al. (1983)
Wiitenoom Dolomite	Hamersley Basin	25	0.4	Schidlowski et al. (1983)
Wiitenoom Dolomite	Hamersley Basin	25	0.5	Schidlowski et al. (1983)
Wittenoom Dolomite	Hamersley Basin	25	0.3	Baur et al. (1985)
Wittenoom Dolomite	Hamersley Basin	25	0.5	Baur et al. (1985)
Wittenoom Dolomite	Hamersley Basin	25	0.6	Baur et al. (1985)
Wittenoom Dolomite	Hamersley Basin	25	-6.4	Becker & Clayton (1972)
Wittenoom Dolomite	Hamersley Basin	25	-6.3	Becker & Clayton (1972)
Wittenoom Dolomite	Hamersley Basin	25	-4.9	Becker & Clayton (1972)
Wittenoom Dolomite	Hamersley Basin	25	-4.7	Becker & Clayton (1972)
Wittenoom Dolomite	Hamersley Basin	25	-4.7	Becker & Clayton (1972)
Wittenoom Dolomite	Hamersley Basin	25	-1.8	Becker & Clayton (1972)
Wittenoom Dolomite	Hamersley Basin	25	-1.8	Becker & Clayton (1972)
Wittenoom Dolomite	Hamersley Basin	25	-1.8	Becker & Clayton (1972)
Wittenoom Dolomite	Hamersley Basin	25	-1.6	Becker & Clayton (1972)
Wittenoom Dolomite	Hamersley Basin	25	-1.2	Becker & Clayton (1972)
Wittenoom Dolomite	Hamersley Basin	25	-1.1	Becker & Clayton (1972)
Wittenoom Dolomite	Hamersley Basin	25	-1.1	Becker & Clayton (1972)
Wittenoom Dolomite	Hamersley Basin	25	-0.8	Becker & Clayton (1972)
Wittenoom Dolomite	Hamersley Basin	25	-0.8	Becker & Clayton (1972)
Wittenoom Dolomite	Hamersley Basin	25	-0.3	Becker & Clayton (1972)
Wittenoom Dolomite	Hamersley Basin	25	-0.1	Becker & Clayton (1972)
Wittenoom Dolomite	Hamersley Basin	25	-5.7	Becker & Clayton (1972)
Wittenoom Dolomite	Hamersley Basin	25	-1.6	Becker & Clayton (1972)
Wittenoom Dolomite	Hamersley Basin	25	-1.8	Becker & Clayton (1972)
Wittenoom Dolomite	Hamersley Basin	25	0.1	Becker & Clayton (1972)
Wittenoom Dolomite	Hamersley Basin	25	0.4	Becker & Clayton (1972)
Wittenoom Dolomite	Hamersley Basin	25	-0.02	Veizer et al. (1990)
Wittenoom Dolomite	Hamersley Basin	25	0.27	Veizer et al. (1990)
Wittenoom Dolomite	Hamersley Basin	25	0.24	Veizer et al. (1990)
Wittenoom Dolomite	Hamersley Basin	25	0.28	Veizer et al. (1990)
Wittenoom Dolomite	Hamersley Basin	25	0.24	Veizer et al. (1990)
Wittenoom Dolomite	Hamersley Basin	25	0.22	Veizer et al. (1990)
Wittenoom Dolomite	Hamersley Basin	25	0.29	Veizer et al. (1990)
Wittenoom Dolomite	Hamersley Basin	25	0.29	Veizer et al. (1990)
Wittenoom Dolomite	Hamersley Basin	25	0.25	Veizer et al. (1990)
Wittenoom Dolomite	Hamersley Basin	25	0.3	Veizer et al. (1990)
Wittenoom Dolomite	Hamersley Basin	25	0.16	Veizer et al. (1990)
Wittenoom Dolomite	Hamersley Basin	25	0.28	Veizer et al. (1990)
Wittenoom Dolomite	Hamersley Basin	25	0.26	Veizer et al. (1990)
Wittenoom Dolomite	Hamersley Basin	25	0.43	Veizer et al. (1990)
Wittenoom Dolomite	Hamersley Basin	25	0.58	Veizer et al. (1990)
Wittenoom Dolomite	Hamersley Basin	25	0.27	Veizer et al. (1990)
Wittenoom Dolomite	Hamersley Basin	25	0.31	Veizer et al. (1990)
Wittenoom Dolomite	Hamersley Basin	25	0.38	Veizer et al. (1990)
Wittenoom Dolomite	Hamersley Basin	25	0.26	Veizer et al. (1990)
Wittenoom Dolomite	Hamersley Basin	25	0.28	Veizer et al. (1990)
Wittenoom Dolomite	Hamersley Basin	25	0.24	Veizer et al. (1990)
Wittenoom Dolomite	Hamersley Basin	25	0.25	Veizer et al. (1990)
Wittenoom Dolomite	Hamersley Basin	25	0.29	Veizer et al. (1990)
Wittenoom Dolomite	Hamersley Basin	25	0.28	Veizer et al. (1990)
Wittenoom Dolomite	Hamersley Basin	25	0.24	Veizer et al. (1990)
Wittenoom Dolomite	Hamersley Basin	25	0.28	Veizer et al. (1990)
Wittenoom Dolomite	Hamersley Basin	25	0.25	Veizer et al. (1990)
Wittenoom Dolomite	Hamersley Basin	25	0.35	Veizer et al. (1990)
Wittenoom Dolomite	Hamersley Basin	25	0.34	Veizer et al. (1990)
Wittenoom Dolomite	Hamersley Basin	25	0.41	Veizer et al. (1990)
Wittenoom Dolomite	Hamersley Basin	25	0.29	Veizer et al. (1990)
Wittenoom Dolomite	Hamersley Basin	25	0.41	Veizer et al. (1990)
Wittenoom Dolomite	Hamersley Basin	25	0.62	Veizer et al. (1990)
Wittenoom Dolomite	Hamersley Basin	25	0.56	Veizer et al. (1990)
Wittenoom Dolomite	Hamersley Basin	25	0.62	Veizer et al. (1990)
Wittenoom Dolomite	Hamersley Basin	25	0.54	Veizer et al. (1990)
Wittenoom Dolomite	Hamersley Basin	25	1.05	Veizer et al. (1990)
Wittenoom Dolomite	Hamersley Basin	25	0.9	Veizer et al. (1990)
Wittenoom Dolomite	Hamersley Basin	25	1.15	Veizer et al. (1990)
Wittenoom Dolomite	Hamersley Basin	25	0.84	Veizer et al. (1990)
Wittenoom Dolomite	Hamersley Basin	25	1.3	Veizer et al. (1990)
Wittenoom Dolomite	Hamersley Basin	25	0.479625	Lindsay & Brasier (2002)
Wittenoom Dolomite	Hamersley Basin	25	0.61436	Lindsay & Brasier (2002)
Wittenoom Dolomite	Hamersley Basin	25	0.432075	Lindsay & Brasier (2002)
Wittenoom Dolomite	Hamersley Basin	25	0.428548	Lindsay & Brasier (2002)
Wittenoom Dolomite	Hamersley Basin	25	0.403701	Lindsay & Brasier (2002)
Wittenoom Dolomite	Hamersley Basin	25	0.381731	Lindsay & Brasier (2002)
Wittenoom Dolomite	Hamersley Basin	25	0.380047	Lindsay & Brasier (2002)
Wittenoom Dolomite	Hamersley Basin	25	0.377374	Lindsay & Brasier (2002)
Wittenoom Dolomite	Hamersley Basin	25	0.362675	Lindsay & Brasier (2002)
Wittenoom Dolomite	Hamersley Basin	25	0.322502	Lindsay & Brasier (2002)
Wittenoom Dolomite	Hamersley Basin	25	0.306475	Lindsay & Brasier (2002)
Wittenoom Dolomite	Hamersley Basin	25	0.291943	Lindsay & Brasier (2002)
Wittenoom Dolomite	Hamersley Basin	25	0.278121	Lindsay & Brasier (2002)
Wittenoom Dolomite	Hamersley Basin	25	0.274206	Lindsay & Brasier (2002)
Wittenoom Dolomite	Hamersley Basin	25	0.247662	Lindsay & Brasier (2002)
Wittenoom Dolomite	Hamersley Basin	25	0.230768	Lindsay & Brasier (2002)
Wittenoom Dolomite	Hamersley Basin	25	0.217896	Lindsay & Brasier (2002)
Wittenoom Dolomite	Hamersley Basin	25	0.212844	Lindsay & Brasier (2002)
Wittenoom Dolomite	Hamersley Basin	25	0.191722	Lindsay & Brasier (2002)
Wittenoom Dolomite	Hamersley Basin	25	0.186049	Lindsay & Brasier (2002)
Wittenoom Dolomite	Hamersley Basin	25	0.18505	Lindsay & Brasier (2002)
Wittenoom Dolomite	Hamersley Basin	25	0.118004	Lindsay & Brasier (2002)
Wittenoom Dolomite	Hamersley Basin	25	0.169279	Lindsay & Brasier (2002)
Wittenoom Dolomite	Hamersley Basin	25	0.0518377	Lindsay & Brasier (2002)
Wittenoom Dolomite	Hamersley Basin	25	0.0874205	Lindsay & Brasier (2002)
Wittenoom Dolomite	Hamersley Basin	25	0.152295	Lindsay & Brasier (2002)
Wittenoom Dolomite	Hamersley Basin	25	0.0838464	Lindsay & Brasier (2002)
Wittenoom Dolomite	Hamersley Basin	25	0.0750559	Lindsay & Brasier (2002)
Wittenoom Dolomite	Hamersley Basin	25	0.141707	Lindsay & Brasier (2002)
Wittenoom Dolomite	Hamersley Basin	25	0.0607816	Lindsay & Brasier (2002)
Wittenoom Dolomite	Hamersley Basin	25	0.137455	Lindsay & Brasier (2002)
Wittenoom Dolomite	Hamersley Basin	25	0.0917483	Lindsay & Brasier (2002)
Wittenoom Dolomite	Hamersley Basin	25	-0.0145608	Lindsay & Brasier (2002)
Wittenoom Dolomite	Hamersley Basin	25	-0.0251623	Lindsay & Brasier (2002)
Wittenoom Dolomite	Hamersley Basin	25	-0.032	Lindsay & Brasier (2002)
Wittenoom Dolomite	Hamersley Basin	25	-0.0352805	Lindsay & Brasier (2002)
Wittenoom Dolomite	Hamersley Basin	25	-0.037	Lindsay & Brasier (2002)
Wittenoom Dolomite	Hamersley Basin	25	-0.0446208	Lindsay & Brasier (2002)
Wittenoom Dolomite	Hamersley Basin	25	-0.0597262	Lindsay & Brasier (2002)
Wittenoom Dolomite	Hamersley Basin	25	-0.0712524	Lindsay & Brasier (2002)
Wittenoom Dolomite	Hamersley Basin	25	-0.0897693	Lindsay & Brasier (2002)
Wittenoom Dolomite	Hamersley Basin	25	-0.103429	Lindsay & Brasier (2002)
Wittenoom Dolomite	Hamersley Basin	25	-0.129032	Lindsay & Brasier (2002)
Wittenoom Dolomite	Hamersley Basin	25	-0.133749	Lindsay & Brasier (2002)
Wittenoom Dolomite	Hamersley Basin	25	-0.147979	Lindsay & Brasier (2002)
Wittenoom Dolomite	Hamersley Basin	25	-0.166141	Lindsay & Brasier (2002)
Wittenoom Dolomite	Hamersley Basin	25	-0.18301	Lindsay & Brasier (2002)
Wittenoom Dolomite	Hamersley Basin	25	-0.20583	Lindsay & Brasier (2002)
Wittenoom Dolomite	Hamersley Basin	25	-0.314706	Lindsay & Brasier (2002)
Wittenoom Dolomite	Hamersley Basin	25	-0.315842	Lindsay & Brasier (2002)
Wittenoom Dolomite	Hamersley Basin	25	-0.490198	Lindsay & Brasier (2002)
Wittenoom Dolomite	Hamersley Basin	25	-0.521996	Lindsay & Brasier (2002)
Wittenoom Dolomite	Hamersley Basin	25	-0.750711	Lindsay & Brasier (2002)
Wittenoom Dolomite	Hamersley Basin	25	-0.779082	Lindsay & Brasier (2002)
Wittenoom Dolomite	Hamersley Basin	25	-2.14166	Lindsay & Brasier (2002)
Wittenoom (Parraburdoo mbr)	Hamersley Basin	25	0.79	Lindsay & Brasier (2002)
Wittenoom (Parraburdoo mbr)	Hamersley Basin	25	0.512218	Lindsay & Brasier (2002)
Wittenoom (Parraburdoo mbr)	Hamersley Basin	25	0.498	Lindsay & Brasier (2002)
Wittenoom (Parraburdoo mbr)	Hamersley Basin	25	0.44	Lindsay & Brasier (2002)
Wittenoom (Parraburdoo mbr)	Hamersley Basin	25	0.429	Lindsay & Brasier (2002)
Wittenoom (Parraburdoo mbr)	Hamersley Basin	25	0.36482	Lindsay & Brasier (2002)
Wittenoom (Parraburdoo mbr)	Hamersley Basin	25	0.362665	Lindsay & Brasier (2002)
Wittenoom (Parraburdoo mbr)	Hamersley Basin	25	0.362	Lindsay & Brasier (2002)
Wittenoom (Parraburdoo mbr)	Hamersley Basin	25	0.329	Lindsay & Brasier (2002)
Wittenoom (Parraburdoo mbr)	Hamersley Basin	25	0.313	Lindsay & Brasier (2002)
Wittenoom (Parraburdoo mbr)	Hamersley Basin	25	0.304	Lindsay & Brasier (2002)
Wittenoom (Parraburdoo mbr)	Hamersley Basin	25	0.296144	Lindsay & Brasier (2002)
Wittenoom (Parraburdoo mbr)	Hamersley Basin	25	0.277	Lindsay & Brasier (2002)
Wittenoom (Parraburdoo mbr)	Hamersley Basin	25	0.276	Lindsay & Brasier (2002)
Wittenoom (Parraburdoo mbr)	Hamersley Basin	25	0.247	Lindsay & Brasier (2002)
Wittenoom (Parraburdoo mbr)	Hamersley Basin	25	0.238	Lindsay & Brasier (2002)
Wittenoom (Parraburdoo mbr)	Hamersley Basin	25	0.222	Lindsay & Brasier (2002)
Wittenoom (Parraburdoo mbr)	Hamersley Basin	25	0.212197	Lindsay & Brasier (2002)
Wittenoom (Parraburdoo mbr)	Hamersley Basin	25	0.212	Lindsay & Brasier (2002)
Wittenoom (Parraburdoo mbr)	Hamersley Basin	25	0.212	Lindsay & Brasier (2002)
Wittenoom (Parraburdoo mbr)	Hamersley Basin	25	0.205798	Lindsay & Brasier (2002)
Wittenoom (Parraburdoo mbr)	Hamersley Basin	25	0.203	Lindsay & Brasier (2002)
Wittenoom (Parraburdoo mbr)	Hamersley Basin	25	0.202415	Lindsay & Brasier (2002)
Wittenoom (Parraburdoo mbr)	Hamersley Basin	25	0.198	Lindsay & Brasier (2002)
Wittenoom (Parraburdoo mbr)	Hamersley Basin	25	0.189802	Lindsay & Brasier (2002)
Wittenoom (Parraburdoo mbr)	Hamersley Basin	25	0.188035	Lindsay & Brasier (2002)
Wittenoom (Parraburdoo mbr)	Hamersley Basin	25	0.181	Lindsay & Brasier (2002)
Wittenoom (Parraburdoo mbr)	Hamersley Basin	25	0.175	Lindsay & Brasier (2002)
Wittenoom (Parraburdoo mbr)	Hamersley Basin	25	0.160764	Lindsay & Brasier (2002)
Wittenoom (Parraburdoo mbr)	Hamersley Basin	25	0.153	Lindsay & Brasier (2002)
Wittenoom (Parraburdoo mbr)	Hamersley Basin	25	0.152268	Lindsay & Brasier (2002)
Wittenoom (Parraburdoo mbr)	Hamersley Basin	25	0.147385	Lindsay & Brasier (2002)
Wittenoom (Parraburdoo mbr)	Hamersley Basin	25	0.13864	Lindsay & Brasier (2002)
Wittenoom (Parraburdoo mbr)	Hamersley Basin	25	0.136155	Lindsay & Brasier (2002)
Wittenoom (Parraburdoo mbr)	Hamersley Basin	25	0.13558	Lindsay & Brasier (2002)
Wittenoom (Parraburdoo mbr)	Hamersley Basin	25	0.132029	Lindsay & Brasier (2002)
Wittenoom (Parraburdoo mbr)	Hamersley Basin	25	0.130324	Lindsay & Brasier (2002)
Wittenoom (Parraburdoo mbr)	Hamersley Basin	25	0.127414	Lindsay & Brasier (2002)
Wittenoom (Parraburdoo mbr)	Hamersley Basin	25	0.125876	Lindsay & Brasier (2002)
Wittenoom (Parraburdoo mbr)	Hamersley Basin	25	0.110699	Lindsay & Brasier (2002)
Wittenoom (Parraburdoo mbr)	Hamersley Basin	25	0.0999	Lindsay & Brasier (2002)
Wittenoom (Parraburdoo mbr)	Hamersley Basin	25	0.091	Lindsay & Brasier (2002)
Wittenoom (Parraburdoo mbr)	Hamersley Basin	25	0.0880481	Lindsay & Brasier (2002)
Wittenoom (Parraburdoo mbr)	Hamersley Basin	25	0.086767	Lindsay & Brasier (2002)
Wittenoom (Parraburdoo mbr)	Hamersley Basin	25	0.0866664	Lindsay & Brasier (2002)
Wittenoom (Parraburdoo mbr)	Hamersley Basin	25	0.0690641	Lindsay & Brasier (2002)
Wittenoom (Parraburdoo mbr)	Hamersley Basin	25	0.057891	Lindsay & Brasier (2002)
Wittenoom (Parraburdoo mbr)	Hamersley Basin	25	0.054	Lindsay & Brasier (2002)
Wittenoom (Parraburdoo mbr)	Hamersley Basin	25	0.0489436	Lindsay & Brasier (2002)
Wittenoom (Parraburdoo mbr)	Hamersley Basin	25	0.0438118	Lindsay & Brasier (2002)
Wittenoom (Parraburdoo mbr)	Hamersley Basin	25	0.03994	Lindsay & Brasier (2002)
Wittenoom (Parraburdoo mbr)	Hamersley Basin	25	0.033	Lindsay & Brasier (2002)
Wittenoom (Parraburdoo mbr)	Hamersley Basin	25	0.0310212	Lindsay & Brasier (2002)
Wittenoom (Parraburdoo mbr)	Hamersley Basin	25	0.0272632	Lindsay & Brasier (2002)
Wittenoom (Parraburdoo mbr)	Hamersley Basin	25	0.016	Lindsay & Brasier (2002)
Wittenoom (Parraburdoo mbr)	Hamersley Basin	25	0.007	Lindsay & Brasier (2002)
Wittenoom (Parraburdoo mbr)	Hamersley Basin	25	0.00510125	Lindsay & Brasier (2002)
Wittenoom (Parraburdoo mbr)	Hamersley Basin	25	-0.00419813	Lindsay & Brasier (2002)
Wittenoom (Parraburdoo mbr)	Hamersley Basin	25	-0.00589501	Lindsay & Brasier (2002)
Wittenoom (Parraburdoo mbr)	Hamersley Basin	25	-0.012	Lindsay & Brasier (2002)
Wittenoom (Parraburdoo mbr)	Hamersley Basin	25	-0.0153805	Lindsay & Brasier (2002)
Wittenoom (Parraburdoo mbr)	Hamersley Basin	25	-0.016858	Lindsay & Brasier (2002)
Wittenoom (Parraburdoo mbr)	Hamersley Basin	25	-0.021	Lindsay & Brasier (2002)
Wittenoom (Parraburdoo mbr)	Hamersley Basin	25	-0.0299203	Lindsay & Brasier (2002)
Wittenoom (Parraburdoo mbr)	Hamersley Basin	25	-0.0431174	Lindsay & Brasier (2002)
Wittenoom (Parraburdoo mbr)	Hamersley Basin	25	-0.0434743	Lindsay & Brasier (2002)
Wittenoom (Parraburdoo mbr)	Hamersley Basin	25	-0.0493341	Lindsay & Brasier (2002)
Wittenoom (Parraburdoo mbr)	Hamersley Basin	25	-0.055643	Lindsay & Brasier (2002)
Wittenoom (Parraburdoo mbr)	Hamersley Basin	25	-0.058297	Lindsay & Brasier (2002)
Wittenoom (Parraburdoo mbr)	Hamersley Basin	25	-0.07	Lindsay & Brasier (2002)
Wittenoom (Parraburdoo mbr)	Hamersley Basin	25	-0.0747263	Lindsay & Brasier (2002)
Wittenoom (Parraburdoo mbr)	Hamersley Basin	25	-0.101629	Lindsay & Brasier (2002)
Wittenoom (Parraburdoo mbr)	Hamersley Basin	25	-0.126818	Lindsay & Brasier (2002)
Wittenoom (Parraburdoo mbr)	Hamersley Basin	25	-0.147419	Lindsay & Brasier (2002)
Wittenoom (Parraburdoo mbr)	Hamersley Basin	25	-0.150539	Lindsay & Brasier (2002)
Wittenoom (Parraburdoo mbr)	Hamersley Basin	25	-0.151917	Lindsay & Brasier (2002)
Wittenoom (Parraburdoo mbr)	Hamersley Basin	25	-0.178907	Lindsay & Brasier (2002)
Wittenoom (Parraburdoo mbr)	Hamersley Basin	25	-0.181155	Lindsay & Brasier (2002)
Wittenoom (Parraburdoo mbr)	Hamersley Basin	25	-0.210304	Lindsay & Brasier (2002)
Wittenoom (Parraburdoo mbr)	Hamersley Basin	25	-0.211024	Lindsay & Brasier (2002)
Wittenoom (Parraburdoo mbr)	Hamersley Basin	25	-0.256082	Lindsay & Brasier (2002)
Wittenoom (Parraburdoo mbr)	Hamersley Basin	25	-0.283018	Lindsay & Brasier (2002)
Wittenoom (Parraburdoo mbr)	Hamersley Basin	25	-0.294295	Lindsay & Brasier (2002)
Wittenoom (Parraburdoo mbr)	Hamersley Basin	25	-0.365102	Lindsay & Brasier (2002)
Klippan Fm	Kaapvaal	25	-4.32	Veizer et al. (1990)
Klippan Fm	Kaapvaal	25	-3.67	Veizer et al. (1990)
Klippan Fm	Kaapvaal	25	-3.19	Veizer et al. (1990)
Klippan Fm	Kaapvaal	25	-4.34	Veizer et al. (1990)
Klippan Fm	Kaapvaal	25	-4.5	Veizer et al. (1990)
Klippan Fm	Kaapvaal	25	-4	Veizer et al. (1990)
Klippan Fm	Kaapvaal	25	-3	Veizer et al. (1990)
Yellowknife Supergroup	NWT, Canada	25	-2.97	Veizer et al. (1989)
Yellowknife Supergroup	NWT, Canada	25	-4.59	Veizer et al. (1989)
Yellowknife Supergroup	NWT, Canada	25	-2.43	Veizer et al. (1989)
Yellowknife Supergroup	NWT, Canada	25	-0.76	Veizer et al. (1989)
Yellowknife Supergroup	NWT, Canada	25	-9.62	Veizer et al. (1989)
Yellowknife Supergroup	NWT, Canada	25	-0.75	Veizer et al. (1989)
Yellowknife Supergroup	NWT, Canada	25	-1.5	Veizer et al. (1989)
Yellowknife Supergroup	NWT, Canada	25	-1	Veizer et al. (1989)
Yellowknife Supergroup	NWT, Canada	25	-0.3	Veizer et al. (1989)
Yellowknife Supergroup	NWT, Canada	25	-3.2	Veizer et al. (1989)
Yellowknife Supergroup	NWT, Canada	25	-5.7	Veizer et al. (1989)
Yellowknife Supergroup	NWT, Canada	25	-6	Veizer et al. (1989)
Yellowknife Supergroup	NWT, Canada	25	-5.97	Veizer et al. (1989)
Yellowknife Supergroup	NWT, Canada	25	-5.4	Veizer et al. (1989)
Malmani Subgroup	Transvaal	25	-0.8	Schidlowski et al. (1983)
Malmani Subgroup	Transvaal	25	-0.9	Schidlowski et al. (1983)
Malmani Subgroup	Transvaal	25	-0.7	Schidlowski et al. (1983)
Malmani Subgroup	Transvaal	25	-0.5	Schidlowski et al. (1983)
Malmani Subgroup	Transvaal	25	-0.8	Schidlowski et al. (1983)
Malmani Subgroup	Transvaal	25	-0.1	Schidlowski et al. (1983)
Malmani Subgroup	Transvaal	25	-0.8	Schidlowski et al. (1983)
Malmani Subgroup	Transvaal	25	-0.9	Schidlowski et al. (1983)
Malmani Subgroup	Transvaal	25	-0.5	Schidlowski et al. (1983)
Malmani Subgroup	Transvaal	25	-0.9	Schidlowski et al. (1983)
Malmani Subgroup	Transvaal	25	-1.3	Schidlowski et al. (1983)
Malmani Subgroup	Transvaal	25	-1	Schidlowski et al. (1983)
Malmani Subgroup	Transvaal	25	-0.6	Schidlowski et al. (1983)
Malmani Dolomite	Transvaal	25	-2.21	Veizer et al. (1992)
Malmani Dolomite	Transvaal	25	-2.01	Veizer et al. (1992)
Malmani Dolomite	Transvaal	25	-0.68	Veizer et al. (1992)
Malmani Dolomite	Transvaal	25	-0.78	Veizer et al. (1992)
Malmani Dolomite	Transvaal	25	-0.67	Veizer et al. (1992)
Malmani Dolomite	Transvaal	25	-1.39	Veizer et al. (1992)
Malmani Dolomite	Transvaal	25	-1.43	Veizer et al. (1992)
Malmani Dolomite	Transvaal	25	-0.84	Veizer et al. (1992)
Malmani Dolomite	Transvaal	25	-0.52	Veizer et al. (1992)
Malmani Dolomite	Transvaal	25	0.15	Veizer et al. (1992)
Malmani Dolomite	Transvaal	25	1.52	Veizer et al. (1992)
Malmani Dolomite	Transvaal	25	-0.76	Veizer et al. (1992)
Malmani Dolomite	Transvaal	25	0.48	Veizer et al. (1992)
Malmani Dolomite	Transvaal	25	-0.63	Veizer et al. (1992)
Malmani Dolomite	Transvaal	25	-0.83	Veizer et al. (1992)
Malmani Dolomite	Transvaal	25	-0.46	Veizer et al. (1992)
Malmani Dolomite	Transvaal	25	-0.9	Veizer et al. (1992)
Malmani Dolomite	Transvaal	25	-0.63	Veizer et al. (1992)
Malmani Dolomite	Transvaal	25	-0.64	Veizer et al. (1992)
Malmani Dolomite	Transvaal	25	-0.81	Veizer et al. (1992)
Malmani Dolomite	Transvaal	25	-0.98	Veizer et al. (1992)
Malmani Dolomite	Transvaal	25	-0.54	Veizer et al. (1992)
Malmani Dolomite	Transvaal	25	-0.73	Veizer et al. (1992)
Malmani Dolomite	Transvaal	25	-1.04	Veizer et al. (1992)
Malmani Dolomite	Transvaal	25	-0.82	Veizer et al. (1992)
Malmani Dolomite	Transvaal	25	-0.34	Veizer et al. (1992)
Malmani Dolomite	Transvaal	25	-0.94	Veizer et al. (1992)
Malmani Dolomite	Transvaal	25	-1.17	Veizer et al. (1992)
Malmani Dolomite	Transvaal	25	0.02	Veizer et al. (1992)
Malmani Dolomite	Transvaal	25	-0.89	Veizer et al. (1992)
Malmani Dolomite	Transvaal	25	-0.09	Veizer et al. (1992)
Malmani Dolomite	Transvaal	25	1.55	Veizer et al. (1992)
Malmani Dolomite	Transvaal	25	-0.53	Veizer et al. (1992)
Malmani Dolomite	Transvaal	25	-0.85	Veizer et al. (1992)
Malmani Dolomite	Transvaal	25	-0.12	Veizer et al. (1992)
Malmani Dolomite	Transvaal	25	-0.68	Veizer et al. (1992)
Malmani Dolomite	Transvaal	25	-0.57	Veizer et al. (1992)
Malmani Dolomite	Transvaal	25	-0.38	Veizer et al. (1992)
Malmani Dolomite	Transvaal	25	-0.54	Veizer et al. (1992)
Malmani Dolomite	Transvaal	25	-0.55	Veizer et al. (1992)
Malmani Dolomite	Transvaal	25	0.35	Veizer et al. (1992)
Malmani Dolomite	Transvaal	25	0.21	Veizer et al. (1992)
Malmani Dolomite	Transvaal	25	-0.74	Veizer et al. (1992)
Malmani Dolomite	Transvaal	25	-0.29	Veizer et al. (1992)
Malmani Dolomite	Transvaal	25	-0.64	Veizer et al. (1992)
Malmani Dolomite	Transvaal	25	-0.8	Veizer et al. (1992)
Malmani Dolomite	Transvaal	25	-0.56	Veizer et al. (1992)
Malmani Dolomite	Transvaal	25	0.25	Veizer et al. (1992)
Malmani Dolomite	Transvaal	25	0.26	Veizer et al. (1992)
Malmani Dolomite	Transvaal	25	-0.62	Veizer et al. (1992)
Malmani Dolomite	Transvaal	25	-0.66	Veizer et al. (1992)
Malmani Dolomite	Transvaal	25	-0.49	Veizer et al. (1992)
Malmani Dolomite	Transvaal	25	-0.37	Veizer et al. (1992)
Malmani Dolomite	Transvaal	25	0.31	Veizer et al. (1992)
Malmani Dolomite	Transvaal	25	-0.2	Veizer et al. (1992)
Malmani Dolomite	Transvaal	25	-0.82	Veizer et al. (1992)
Malmani Dolomite	Transvaal	25	0.25	Veizer et al. (1992)
Malmani Dolomite	Transvaal	25	-0.68	Veizer et al. (1992)
Malmani Dolomite	Transvaal	25	-1.19	Veizer et al. (1992)
Malmani Dolomite	Transvaal	25	-0.39	Veizer et al. (1992)
Malmani Dolomite	Transvaal	25	0.03	Veizer et al. (1992)
Malmani Dolomite	Transvaal	25	0.04	Veizer et al. (1992)
Malmani Dolomite	Transvaal	25	-0.54	Veizer et al. (1992)
Malmani Dolomite	Transvaal	25	0.45	Veizer et al. (1992)
Malmani Dolomite	Transvaal	25	-0.54	Veizer et al. (1992)
Malmani Dolomite	Transvaal	25	-0.48	Veizer et al. (1992)
Malmani Dolomite	Transvaal	25	0.32	Veizer et al. (1992)
Malmani Dolomite	Transvaal	25	0.18	Veizer et al. (1992)
Malmani Dolomite	Transvaal	25	-0.7	Veizer et al. (1992)
Malmani Dolomite	Transvaal	25	0.06	Veizer et al. (1992)
Malmani Dolomite	Transvaal	25	-0.59	Veizer et al. (1992)
Malmani Dolomite	Transvaal	25	0.22	Veizer et al. (1992)
Malmani Dolomite	Transvaal	25	0.22	Veizer et al. (1992)
Malmani Dolomite	Transvaal	25	0.26	Veizer et al. (1992)
Malmani Dolomite	Transvaal	25	0.01	Veizer et al. (1992)
Malmani Dolomite	Transvaal	25	0.06	Veizer et al. (1992)
Malmani Dolomite	Transvaal	25	-0.11	Veizer et al. (1992)
Malmani Dolomite	Transvaal	25	0.01	Veizer et al. (1992)
Malmani Dolomite	Transvaal	25	-0.61	Veizer et al. (1992)
Malmani Dolomite	Transvaal	25	0.03	Veizer et al. (1992)
Malmani Dolomite	Transvaal	25	-0.04	Veizer et al. (1992)
Malmani Dolomite	Transvaal	25	0.01	Veizer et al. (1992)
Malmani Dolomite	Transvaal	25	0.56	Veizer et al. (1992)
Malmani Dolomite	Transvaal	25	0.07	Veizer et al. (1992)
Malmani Dolomite	Transvaal	25	-0.5	Veizer et al. (1992)
Malmani Dolomite	Transvaal	25	0.41	Veizer et al. (1992)
Malmani Dolomite	Transvaal	25	0.2	Veizer et al. (1992)
Malmani Dolomite	Transvaal	25	0.08	Veizer et al. (1992)
Ghaap Gp (Tongwe Fm)	Transvaal Basin	25	-0.8	Guo et al. (2009)
Campbellrand Gp (Gamohaan Fm)	Transvaal Basin	25	-0.3	Guo et al. (2009)
Campbellrand Gp (Reivello Fm)	Transvaal Basin	25	-0.5	Guo et al. (2009)
Campbellrand Gp (Monteville Fm)	Transvaal Basin	25	-0.5	Guo et al. (2009)
Campbellrand Gp (Boomplaas Fm	Transvaal Basin	25	0.3	Guo et al. (2009)
Dolomite Series	Transvaal Basin	25	-0.8	Schidlowski et al. (1975)
Dolomite Series	Transvaal Basin	25	-2.3	Schidlowski et al. (1975)
Dolomite Series	Transvaal Basin	25	-2.8	Schidlowski et al. (1975)
Dolomite Series	Transvaal Basin	25	-0.7	Schidlowski et al. (1975)
Dolomite Series	Transvaal Basin	25	0	Schidlowski et al. (1975)
Dolomite Series	Transvaal Basin	25	-1.1	Schidlowski et al. (1975)
Dolomite Series	Transvaal Basin	25	-0.8	Schidlowski et al. (1975)
Dolomite Series	Transvaal Basin	25	-1.3	Schidlowski et al. (1975)
Dolomite Series	Transvaal Basin	25	0.3	Schidlowski et al. (1975)
Dolomite Series	Transvaal Basin	25	-2.3	Schidlowski et al. (1975)
Dolomite Series	Transvaal Basin	25	-0.7	Schidlowski et al. (1975)
Dolomite Series	Transvaal Basin	25	-0.5	Schidlowski et al. (1975)
Dolomite Series	Transvaal Basin	25	-1.4	Schidlowski et al. (1983)
Dolomite Series	Transvaal Basin	25	-3	Schidlowski et al. (1975)
Dolomite Series	Transvaal Basin	25	-2.9	Schidlowski et al. (1975)
Dolomite Series	Transvaal Basin	25	-3	Schidlowski et al. (1975)
Dolomite Series	Transvaal Basin	25	-0.7	Schidlowski et al. (1975)
Dolomite Series	Transvaal Basin	25	-2.2	Schidlowski et al. (1975)
Dolomite Series	Transvaal Basin	25	-1.7	Schidlowski et al. (1975)
Dolomite Series	Transvaal Basin	25	0.7	Schidlowski et al. (1975)
Dolomite Series	Transvaal Basin	25	-2.1	Schidlowski et al. (1975)
Dolomite Series	Transvaal Basin	25	-1.2	Schidlowski et al. (1975)
Dolomite Series	Transvaal Basin	25	-1.3	Schidlowski et al. (1975)
Dolomite Series	Transvaal Basin	25	-0.8	Schidlowski et al. (1975)
Dolomite Series	Transvaal Basin	25	0.2	Schidlowski et al. (1975)
Dolomite Series	Transvaal Basin	25	-0.9	Schidlowski et al. (1975)
Dolomite Series	Transvaal Basin	25	-0.8	Schidlowski et al. (1975)
Dolomite Series	Transvaal Basin	25	0.2	Schidlowski et al. (1975)
Dolomite Series	Transvaal Basin	25	-0.5	Schidlowski et al. (1975)
Dolomite Series	Transvaal Basin	25	-1	Schidlowski et al. (1975)
Dolomite Series	Transvaal Basin	25	-1.9	Schidlowski et al. (1975)
Dolomite Series	Transvaal Basin	25	-1	Schidlowski et al. (1975)
Dolomite Series	Transvaal Basin	25	-2.7	Schidlowski et al. (1975)
Dolomite Series	Transvaal Basin	25	-1.1	Schidlowski et al. (1975)
Dolomite Series	Transvaal Basin	25	-0.3	Schidlowski et al. (1975)
Dolomite Series	Transvaal Basin	25	-0.5	Schidlowski et al. (1975)
Dolomite Series	Transvaal Basin	25	-0.9	Schidlowski et al. (1975)
Dolomite Series	Transvaal Basin	25	0.3	Schidlowski et al. (1975)
Dolomite Series	Transvaal Basin	25	-0.8	Schidlowski et al. (1975)
Dolomite Series	Transvaal Basin	25	0	Schidlowski et al. (1975)
Dolomite Series	Transvaal Basin	25	0.2	Schidlowski et al. (1975)
Dolomite Series	Transvaal Basin	25	-0.6	Schidlowski et al. (1975)
Dolomite Series	Transvaal Basin	25	0	Schidlowski et al. (1975)
Dolomite Series	Transvaal Basin	25	-1.3	Schidlowski et al. (1975)
Dolomite Series	Transvaal Basin	25	-0.3	Schidlowski et al. (1975)
Dolomite Series	Transvaal Basin	25	-0.9	Schidlowski et al. (1975)
Dolomite Series	Transvaal Basin	25	-1.3	Schidlowski et al. (1975)
Dolomite Series	Transvaal Basin	25	-0.9	Schidlowski et al. (1975)
Dolomite Series	Transvaal Basin	25	-0.5	Schidlowski et al. (1975)
Dolomite Series	Transvaal Basin	25	-0.6	Schidlowski et al. (1975)
Dolomite Series	Transvaal Basin	25	-1.2	Schidlowski et al. (1975)
Dolomite Series	Transvaal Basin	25	-1	Schidlowski et al. (1975)
Dolomite Series	Transvaal Basin	25	-1.3	Schidlowski et al. (1975)
Dolomite Series	Transvaal Basin	25	-0.8	Schidlowski et al. (1975)
Dolomite Series	Transvaal Basin	25	-1	Schidlowski et al. (1975)
Dolomite Series	Transvaal Basin	25	-0.5	Schidlowski et al. (1975)
Dolomite Series	Transvaal Basin	25	-0.6	Schidlowski et al. (1975)
Dolomite Series	Transvaal Basin	25	-0.9	Schidlowski et al. (1975)
Dolomite Series	Transvaal Basin	25	-1	Schidlowski et al. (1975)
Dolomite Series	Transvaal Basin	25	-0.9	Schidlowski et al. (1975)
Dolomite Series	Transvaal Basin	25	0.3	Schidlowski et al. (1975)
Dolomite Series	Transvaal Basin	25	-0.8	Schidlowski et al. (1975)
Dolomite Series	Transvaal Basin	25	-1.1	Schidlowski et al. (1975)
Dolomite Series	Transvaal Basin	25	-1.2	Schidlowski et al. (1975)
Dolomite Series	Transvaal Basin	25	-1.1	Schidlowski et al. (1975)
Dolomite Series	Transvaal Basin	25	-0.3	Schidlowski et al. (1975)
Dolomite Series	Transvaal Basin	25	-0.3	Schidlowski et al. (1975)
Dolomite Series	Transvaal Basin	25	-0.7	Schidlowski et al. (1975)
Dolomite Series	Transvaal Basin	25	-0.6	Schidlowski et al. (1975)
Dolomite Series	Transvaal Basin	25	-0.2	Schidlowski et al. (1975)
Dolomite Series	Transvaal Basin	25	-0.7	Schidlowski et al. (1975)
Dolomite Series	Transvaal Basin	25	-0.5	Schidlowski et al. (1975)
Dolomite Series	Transvaal Basin	25	-0.8	Schidlowski et al. (1975)
Dolomite Series	Transvaal Basin	25	-1.6	Schidlowski et al. (1975)
Dolomite Series	Transvaal Basin	25	-0.2	Schidlowski et al. (1975)
Dolomite Series	Transvaal Basin	25	-0.8	Schidlowski et al. (1975)
Transvaal Supergroup	Transvaal Basin	24	-1.1	Eichmann & Schidlowski (1975)
Transvaal Supergroup	Transvaal Basin	24	-0.8	Eichmann & Schidlowski (1975)
Transvaal Supergroup	Transvaal Basin	24	0.3	Eichmann & Schidlowski (1975)
Transvaal Supergroup	Transvaal Basin	24	-0.9	Eichmann & Schidlowski (1975)
Transvaal Supergroup	Transvaal Basin	24	-0.8	Eichmann & Schidlowski (1975)
Transvaal Supergroup	Transvaal Basin	24	-0.5	Eichmann & Schidlowski (1975)
Transvaal Supergroup	Transvaal Basin	24	0.2	Eichmann & Schidlowski (1975)
Transvaal Supergroup	Transvaal Basin	24	-1	Eichmann & Schidlowski (1975)
Transvaal Supergroup	Transvaal Basin	24	-0.2	Eichmann & Schidlowski (1975)
Transvaal Supergroup	Transvaal Basin	24	0.2	Eichmann & Schidlowski (1975)
Transvaal Supergroup	Transvaal Basin	24	-0.7	Eichmann & Schidlowski (1975)
Transvaal Supergroup	Transvaal Basin	24	-0.9	Eichmann & Schidlowski (1975)
Tongwane Fm	Transvaal Basin	24	2.3	Warke et al. (2018)
Tongwane Fm	Transvaal Basin	24	1.8	Warke et al. (2018)
Tongwane Fm	Transvaal Basin	24	-6.9	Warke et al. (2018)
Tongwane Fm	Transvaal Basin	24	-2.6	Warke et al. (2018)
Tongwane Fm	Transvaal Basin	24	3	Warke et al. (2018)
Tongwane Fm	Transvaal Basin	24	2.5	Warke et al. (2018)
Tongwane Fm	Transvaal Basin	24	2.9	Warke et al. (2018)
Tongwane Fm	Transvaal Basin	24	2.2	Warke et al. (2018)
Tongwane Fm	Transvaal Basin	24	-2.3	Warke et al. (2018)
Tongwane Fm	Transvaal Basin	24	-15.4	Warke et al. (2018)
Tongwane Fm	Transvaal Basin	24	-13.9	Warke et al. (2018)
Tongwane Fm	Transvaal Basin	24	-11.4	Warke et al. (2018)
Tongwane Fm	Transvaal Basin	24	-1.9	Warke et al. (2018)
Tongwane Fm	Transvaal Basin	24	-8.3	Warke et al. (2018)
Tongwane Fm	Transvaal Basin	24	-9.5	Warke et al. (2018)
Tongwane Fm	Transvaal Basin	24	2.9	Bekker et al. (2001)
Tongwane Fm	Transvaal Basin	24	2.8	Bekker et al. (2001)
Tongwane Fm	Transvaal Basin	24	1.9	Bekker et al. (2001)
Tongwane Fm	Transvaal Basin	24	3.5	Bekker et al. (2001)
Tongwane Fm	Transvaal Basin	24	3	Bekker et al. (2001)
Mooidraai Dolomite (lower part)	Transvaal Basin	24	0.64	Bau et al. (1999)
Mooidraai Dolomite (lower part)	Transvaal Basin	24	0.52	Bau et al. (1999)
Mooidraai Dolomite (lower part)	Transvaal Basin	24	0.51	Bau et al. (1999)
Mooidraai Dolomite (lower part)	Transvaal Basin	24	0.54	Bau et al. (1999)
Mooidraai Dolomite (lower part)	Transvaal Basin	24	0.6	Bau et al. (1999)
Mooidraai Dolomite (lower part)	Transvaal Basin	24	0.57	Bau et al. (1999)
Mooidraai Dolomite (lower part)	Transvaal Basin	24	0.63	Bau et al. (1999)
Mooidraai Dolomite (lower part)	Transvaal Basin	24	0.6	Bau et al. (1999)
Mooidraai Dolomite (lower part)	Transvaal Basin	24	0.57	Bau et al. (1999)
Mooidraai Dolomite (lower part)	Transvaal Basin	24	0.64	Bau et al. (1999)
Mooidraai Fm (lower part)	Transvaal Basin	24	-1.4	Guo et al. (2009)
Mooidraai Fm (lower part)	Transvaal Basin	24	-1.1	Guo et al. (2009)
Mooidraai Fm (lower part)	Transvaal Basin	24	0.2	Guo et al. (2009)
Mooidraai Fm (upper part)	Transvaal Basin	24	0.5	Guo et al. (2009)
Mooidraai Fm (upper part)	Transvaal Basin	24	-0.1	Guo et al. (2009)
Lower Duitschland Fm	Transvaal Basin	24	-1.7	Guo et al. (2009)
Lower Duitschland Fm	Transvaal Basin	24	1.9	Guo et al. (2009)
Lower Duitschland Fm	Transvaal Basin	24	0.01	Guo et al. (2009)
Lower Duitschland Fm	Transvaal Basin	24	-1.4	Guo et al. (2009)
Lower Duitschland Fm	Transvaal Basin	24	-1.4	Guo et al. (2009)
Lower Duitschland Fm	Transvaal Basin	24	-1.71	Guo et al. (2009)
Lower Duitschland Fm	Transvaal Basin	24	-0.2	Warke (2016)
Lower Duitschland Fm	Transvaal Basin	24	-0.7	Warke (2016)
Lower Duitschland Fm	Transvaal Basin	24	-0.8	Warke (2016)
Lower Duitschland Fm	Transvaal Basin	24	-1	Warke (2016)
Lower Duitschland Fm	Transvaal Basin	24	-6	Warke (2016)
Lower Duitschland Fm	Transvaal Basin	24	-4.4	Warke (2016)
Lower Duitschland Fm	Transvaal Basin	24	-2.5	Warke (2016)
Lower Duitschland Fm	Transvaal Basin	24	-3.4	Warke (2016)
Lower Duitschland Fm	Transvaal Basin	24	-0.4	Warke (2016)
Lower Duitschland Fm	Transvaal Basin	24	-0.5	Warke (2016)
Lower Duitschland Fm	Transvaal Basin	24	-1.8	Warke (2016)
Lower Duitschland Fm	Transvaal Basin	24	-6	Warke (2016)
Lower Duitschland Fm	Transvaal Basin	24	-4.4	Warke (2016)
Lower Duitschland Fm	Transvaal Basin	24	-1.2	Warke (2016)
Lower Duitschland Fm	Transvaal Basin	24	-1.5	Warke (2016)
Lower Duitschland Fm	Transvaal Basin	24	-0.9	Warke (2016)
Lower Duitschland Fm	Transvaal Basin	24	-0.3	Warke (2016)
Lower Duitschland Fm	Transvaal Basin	24	-4	Warke (2016)
Lower Duitschland Fm	Transvaal Basin	24	-1.1	Warke (2016)
Lower Duitschland Fm	Transvaal Basin	24	-6.2	Warke (2016)
Lower Duitschland Fm	Transvaal Basin	24	-4.5	Warke (2016)
Lower Duitschland Fm	Transvaal Basin	24	-0.7	Warke (2016)
Lower Duitschland Fm	Transvaal Basin	24	-0.28	Frauenstein et al. (2009)
Lower Duitschland Fm	Transvaal Basin	24	-1.33	Frauenstein et al. (2009)
Lower Duitschland Fm	Transvaal Basin	24	-0.67	Frauenstein et al. (2009)
Lower Duitschland Fm	Transvaal Basin	24	-4.9	Frauenstein et al. (2009)
Lower Duitschland Fm	Transvaal Basin	24	-1.19	Frauenstein et al. (2009)
Lower Duitschland Fm	Transvaal Basin	24	-0.92	Frauenstein et al. (2009)
Lower Duitschland Fm	Transvaal Basin	24	-2.41	Frauenstein et al. (2009)
Lower Duitschland Fm	Transvaal Basin	24	-0.97	Frauenstein et al. (2009)
Lower Duitschland Fm	Transvaal Basin	24	-4.88	Frauenstein et al. (2009)
Lower Duitschland Fm	Transvaal Basin	24	-6.26	Frauenstein et al. (2009)
Lower Duitschland Fm	Transvaal Basin	24	-6.35	Frauenstein et al. (2009)
Lower Duitschland Fm	Transvaal Basin	24	-4.42	Frauenstein et al. (2009)
Lower Duitschland Fm	Transvaal Basin	24	-1.3	Bekker et al. (2001)
Lower Duitschland Fm	Transvaal Basin	24	-1.8	Bekker et al. (2001)
Lower Duitschland Fm	Transvaal Basin	24	-3.1	Bekker et al. (2001)
Lower Duitschland Fm	Transvaal Basin	24	-1.4	Bekker et al. (2001)
Lower Duitschland Fm	Transvaal Basin	24	-1.6	Bekker et al. (2001)
Lower Duitschland Fm	Transvaal Basin	24	-2	Bekker et al. (2001)
Lower Duitschland Fm	Transvaal Basin	24	-1.8	Bekker et al. (2001)
Lower Duitschland Fm	Transvaal Basin	24	-3	Bekker et al. (2001)
Lower Duitschland Fm	Transvaal Basin	24	0.1	Bekker et al. (2001)
Lower Duitschland Fm	Transvaal Basin	24	-2.7	Bekker et al. (2001)
Lower Duitschland Fm	Transvaal Basin	24	-1.8	Bekker et al. (2001)
Lower Duitschland Fm	Transvaal Basin	24	-2.4	Bekker et al. (2001)
Lower Duitschland Fm	Transvaal Basin	24	-3.7	Bekker et al. (2001)
Dashiling Fm (Nandaxian Mbr)	Wutai Mtn area-Shanxi Prov.	24	1.65	Zhong & Ma (1997)
Dashiling Fm (Nandaxian Mbr)	Wutai Mtn area-Shanxi Prov.	24	1.33	Zhong & Ma (1997)
Dashiling Fm (Nandaxian Mbr)	Wutai Mtn area-Shanxi Prov.	24	1.24	Zhong & Ma (1997)
Dashiling Fm (Nandaxian Mbr)	Wutai Mtn area-Shanxi Prov.	24	1.67	Zhong & Ma (1997)
Dashiling Fm (Nandaxian Mbr)	Wutai Mtn area-Shanxi Prov.	24	1.44	Zhong & Ma (1997)
Dashiling Fm (Nandaxian Mbr)	Wutai Mtn area-Shanxi Prov.	24	1.47	Zhong & Ma (1997)
Dashiling Fm (Nandaxian Mbr)	Wutai Mtn area-Shanxi Prov.	24	1.68	Zhong & Ma (1997)
Dashiling Fm (Nandaxian Mbr)	Wutai Mtn area-Shanxi Prov.	24	1.67	Zhong & Ma (1997)
Dashiling Fm (Nandaxian Mbr)	Wutai Mtn area-Shanxi Prov.	24	2.02	Zhong & Ma (1997)
Dashiling Fm (Nandaxian Mbr)	Wutai Mtn area-Shanxi Prov.	24	1.68	Zhong & Ma (1997)
Dashiling Fm (Nandaxian Mbr)	Wutai Mtn area-Shanxi Prov.	24	1.46	Zhong & Ma (1997)
Dashiling Fm (Nandaxian Mbr)	Wutai Mtn area-Shanxi Prov.	24	1.74	Zhong & Ma (1997)
Dashiling Fm (Nandaxian Mbr)	Wutai Mtn area-Shanxi Prov.	24	1.34	Zhong & Ma (1997)
Dashiling Fm (Nandaxian Mbr)	Wutai Mtn area-Shanxi Prov.	24	2.25	Zhong & Ma (1997)
Dashiling Fm (Nandaxian Mbr)	Wutai Mtn area-Shanxi Prov.	24	2.61	Zhong & Ma (1997)
Dashiling Fm (Nandaxian Mbr)	Wutai Mtn area-Shanxi Prov.	24	3.08	Zhong & Ma (1997)
Dashiling Fm (Nandaxian Mbr)	Wutai Mtn area-Shanxi Prov.	24	2.44	Zhong & Ma (1997)
Dashiling Fm (Nandaxian Mbr)	Wutai Mtn area-Shanxi Prov.	24	2.39	Zhong & Ma (1997)
Dashiling Fm (Nandaxian Mbr)	Wutai Mtn area-Shanxi Prov.	24	2.68	Zhong & Ma (1997)
Dashiling Fm (Nandaxian Mbr)	Wutai Mtn area-Shanxi Prov.	24	2.29	Zhong & Ma (1997)
Dashiling Fm (Nandaxian Mbr)	Wutai Mtn area-Shanxi Prov.	24	2.52	Zhong & Ma (1997)
Dashiling Fm (Nandaxian Mbr)	Wutai Mtn area-Shanxi Prov.	24	3.08	Zhong & Ma (1997)
Dashiling Fm (Nandaxian Mbr)	Wutai Mtn area-Shanxi Prov.	24	3.12	Zhong & Ma (1997)
Dashiling Fm (Nandaxian Mbr)	Wutai Mtn area-Shanxi Prov.	24	3.12	Zhong & Ma (1997)
Dashiling Fm (Nandaxian Mbr)	Wutai Mtn area-Shanxi Prov.	24	1.76	Zhong & Ma (1997)
Dashiling Fm (Nandaxian Mbr)	Wutai Mtn area-Shanxi Prov.	24	2.72	Zhong & Ma (1997)
Dashiling Fm (Nandaxian Mbr)	Wutai Mtn area-Shanxi Prov.	24	2.69	Zhong & Ma (1997)
Dashiling Fm (Nandaxian Mbr)	Wutai Mtn area-Shanxi Prov.	24	2.65	Zhong & Ma (1997)
Dashiling Fm (Nandaxian Mbr)	Wutai Mtn area-Shanxi Prov.	24	2.81	Zhong & Ma (1997)
Dashiling Fm (Nandaxian Mbr)	Wutai Mtn area-Shanxi Prov.	24	2.89	Zhong & Ma (1997)
Dashiling Fm (Nandaxian Mbr)	Wutai Mtn area-Shanxi Prov.	24	2.61	Zhong & Ma (1997)
Dashiling Fm (Nandaxian Mbr)	Wutai Mtn area-Shanxi Prov.	24	2.81	Zhong & Ma (1997)
Dashiling Fm (Nandaxian Mbr)	Wutai Mtn area-Shanxi Prov.	24	3.52	Zhong & Ma (1997)
Dashiling Fm (Nandaxian Mbr)	Wutai Mtn area-Shanxi Prov.	24	1.76	Zhong & Ma (1997)
Dashiling Fm (Nandaxian Mbr)	Wutai Mtn area-Shanxi Prov.	24	2.89	Zhong & Ma (1997)
Dashiling Fm (Nandaxian Mbr)	Wutai Mtn area-Shanxi Prov.	24	2.68	Zhong & Ma (1997)
Dashiling Fm (Nandaxian Mbr)	Wutai Mtn area-Shanxi Prov.	24	2.7	Zhong & Ma (1997)
Dashiling Fm (Nandaxian Mbr)	Wutai Mtn area-Shanxi Prov.	24	2.35	Zhong & Ma (1997)
Dashiling Fm (Nandaxian Mbr)	Wutai Mtn area-Shanxi Prov.	24	2.54	Zhong & Ma (1997)
Dashiling Fm (Nandaxian Mbr)	Wutai Mtn area-Shanxi Prov.	24	2.44	Zhong & Ma (1997)
Dashiling Fm (Nandaxian Mbr)	Wutai Mtn area-Shanxi Prov.	24	1.04	Zhong & Ma (1997)
Dashiling Fm (Nandaxian Mbr)	Wutai Mtn area-Shanxi Prov.	24	1.74	Zhong & Ma (1997)
Dashiling Fm (Nandaxian Mbr)	Wutai Mtn area-Shanxi Prov.	24	1.42	Zhong & Ma (1997)
Dashiling Fm (Nandaxian Mbr)	Wutai Mtn area-Shanxi Prov.	24	2.07	Zhong & Ma (1997)
Dashiling Fm (Nandaxian Mbr)	Wutai Mtn area-Shanxi Prov.	24	1.96	Zhong & Ma (1997)
Dashiling Fm (Nandaxian Mbr)	Wutai Mtn area-Shanxi Prov.	24	2.07	Zhong & Ma (1997)
Dashiling Fm (Nandaxian Mbr)	Wutai Mtn area-Shanxi Prov.	24	2.15	Zhong & Ma (1997)
Dashiling Fm (Nandaxian Mbr)	Wutai Mtn area-Shanxi Prov.	24	1.84	Zhong & Ma (1997)
Dashiling Fm (Nandaxian Mbr)	Wutai Mtn area-Shanxi Prov.	24	1.4	Zhong & Ma (1997)
Dashiling Fm (Nandaxian Mbr)	Wutai Mtn area-Shanxi Prov.	24	1.55	Zhong & Ma (1997)
Dashiling Fm (Nandaxian Mbr)	Wutai Mtn area-Shanxi Prov.	24	1.55	Zhong & Ma (1997)
Dashiling Fm (Nandaxian Mbr)	Wutai Mtn area-Shanxi Prov.	24	1.56	Zhong & Ma (1997)
Dashiling Fm (Nandaxian Mbr)	Wutai Mtn area-Shanxi Prov.	24	1.59	Zhong & Ma (1997)
Dashiling Fm (Nandaxian Mbr)	Wutai Mtn area-Shanxi Prov.	24	1.74	Zhong & Ma (1997)
Dashiling Fm (Nandaxian Mbr)	Wutai Mtn area-Shanxi Prov.	24	1.36	Zhong & Ma (1997)
Dashiling Fm (Nandaxian Mbr)	Wutai Mtn area-Shanxi Prov.	24	2.27	Zhong & Ma (1997)
Dashiling Fm (Nandaxian Mbr)	Wutai Mtn area-Shanxi Prov.	24	1.39	Zhong & Ma (1997)
Dashiling Fm (Nandaxian Mbr)	Wutai Mtn area-Shanxi Prov.	24	1.61	Zhong & Ma (1997)
Dashiling Fm (Nandaxian Mbr)	Wutai Mtn area-Shanxi Prov.	24	1.56	Zhong & Ma (1997)
Dashiling Fm (Nandaxian Mbr)	Wutai Mtn area-Shanxi Prov.	24	1.9	Zhong & Ma (1997)
Dashiling Fm (Nandaxian Mbr)	Wutai Mtn area-Shanxi Prov.	24	1.53	Zhong & Ma (1997)
Dashiling Fm (Nandaxian Mbr)	Wutai Mtn area-Shanxi Prov.	24	1.46	Zhong & Ma (1997)
Dashiling Fm (Nandaxian Mbr)	Wutai Mtn area-Shanxi Prov.	24	1.54	Zhong & Ma (1997)
Dashiling Fm (Nandaxian Mbr)	Wutai Mtn area-Shanxi Prov.	24	1.03	Zhong & Ma (1997)
Dashiling Fm (Nandaxian Mbr)	Wutai Mtn area-Shanxi Prov.	24	1.2	Zhong & Ma (1997)
Dashiling Fm (Nandaxian Mbr)	Wutai Mtn area-Shanxi Prov.	24	2.17	Zhong & Ma (1997)
Dashiling Fm (Nandaxian Mbr)	Wutai Mtn area-Shanxi Prov.	24	1.44	Zhong & Ma (1997)
Dashiling Fm (Nandaxian Mbr)	Wutai Mtn area-Shanxi Prov.	24	1.65	Zhong & Ma (1997)
Dashiling Fm (Nandaxian Mbr)	Wutai Mtn area-Shanxi Prov.	24	1.32	Zhong & Ma (1997)
Dashiling Fm (Nandaxian Mbr)	Wutai Mtn area-Shanxi Prov.	24	1.53	Zhong & Ma (1997)
Dashiling Fm (Nandaxian Mbr)	Wutai Mtn area-Shanxi Prov.	24	0.61	Zhong & Ma (1997)
Dashiling Fm (Nandaxian Mbr)	Wutai Mtn area-Shanxi Prov.	24	1.66	Zhong & Ma (1997)
Dashiling Fm (Nandaxian Mbr)	Wutai Mtn area-Shanxi Prov.	24	1.46	Zhong & Ma (1997)
Dashiling Fm (Nandaxian Mbr)	Wutai Mtn area-Shanxi Prov.	24	1.26	Zhong & Ma (1997)
Dashiling Fm (Nandaxian Mbr)	Wutai Mtn area-Shanxi Prov.	24	1.71	Zhong & Ma (1997)
Dashiling Fm (Nandaxian Mbr)	Wutai Mtn area-Shanxi Prov.	24	1.76	Zhong & Ma (1997)
Dashiling Fm (Nandaxian Mbr)	Wutai Mtn area-Shanxi Prov.	24	1.46	Zhong & Ma (1997)
Dashiling Fm (Nandaxian Mbr)	Wutai Mtn area-Shanxi Prov.	24	1.45	Zhong & Ma (1997)
Dashiling Fm (Nandaxian Mbr)	Wutai Mtn area-Shanxi Prov.	24	1.82	Zhong & Ma (1997)
Dashiling Fm (Nandaxian Mbr)	Wutai Mtn area-Shanxi Prov.	24	1.67	Zhong & Ma (1997)
Dashiling Fm (Nandaxian Mbr)	Wutai Mtn area-Shanxi Prov.	24	2.14	Zhong & Ma (1997)
Dashiling Fm (Nandaxian Mbr)	Wutai Mtn area-Shanxi Prov.	24	1.99	Zhong & Ma (1997)
Dashiling Fm (Nandaxian Mbr)	Wutai Mtn area-Shanxi Prov.	24	2.02	Zhong & Ma (1997)
Dashiling Fm (Nandaxian Mbr)	Wutai Mtn area-Shanxi Prov.	24	2.6	Zhong & Ma (1997)
Dashiling Fm (Nandaxian Mbr)	Wutai Mtn area-Shanxi Prov.	24	2.41	Zhong & Ma (1997)
Dashiling Fm (Nandaxian Mbr)	Wutai Mtn area-Shanxi Prov.	24	1.97	Zhong & Ma (1997)
Dashiling Fm (Nandaxian Mbr)	Wutai Mtn area-Shanxi Prov.	24	1.92	Zhong & Ma (1997)
Dashiling Fm (Nandaxian Mbr)	Wutai Mtn area-Shanxi Prov.	24	1.75	Zhong & Ma (1997)
Dashiling Fm (Nandaxian Mbr)	Wutai Mtn area-Shanxi Prov.	24	1.55	Zhong & Ma (1997)
Dashiling Fm (Nandaxian Mbr)	Wutai Mtn area-Shanxi Prov.	24	1.01	Zhong & Ma (1997)
Dashiling Fm (Nandaxian Mbr)	Wutai Mtn area-Shanxi Prov.	24	1.63	Zhong & Ma (1997)
Dashiling Fm (Nandaxian Mbr)	Wutai Mtn area-Shanxi Prov.	24	1.7	Zhong & Ma (1997)
Dashiling Fm (Nandaxian Mbr)	Wutai Mtn area-Shanxi Prov.	24	0.75	Zhong & Ma (1997)
Dashiling Fm (Nandaxian Mbr)	Wutai Mtn area-Shanxi Prov.	24	1.68	Zhong & Ma (1997)
Dashiling Fm (Nandaxian Mbr)	Wutai Mtn area-Shanxi Prov.	24	1.27	Zhong & Ma (1997)
Dashiling Fm (Nandaxian Mbr)	Wutai Mtn area-Shanxi Prov.	24	1.01	Zhong & Ma (1997)
Dashiling Fm (Nandaxian Mbr)	Wutai Mtn area-Shanxi Prov.	24	1.92	Zhong & Ma (1997)
Dashiling Fm (Nandaxian Mbr)	Wutai Mtn area-Shanxi Prov.	24	1.7	Zhong & Ma (1997)
Dashiling Fm (Nandaxian Mbr)	Wutai Mtn area-Shanxi Prov.	24	2.19	Zhong & Ma (1997)
Dashiling Fm (Nandaxian Mbr)	Wutai Mtn area-Shanxi Prov.	24	1.47	Zhong & Ma (1997)
Dashiling Fm (Nandaxian Mbr)	Wutai Mtn area-Shanxi Prov.	24	1.47	Zhong & Ma (1997)
Dashiling Fm (Nandaxian Mbr)	Wutai Mtn area-Shanxi Prov.	24	2.32	Zhong & Ma (1997)
Dashiling Fm (Nandaxian Mbr)	Wutai Mtn area-Shanxi Prov.	24	1.38	Zhong & Ma (1997)
Dashiling Fm (Nandaxian Mbr)	Wutai Mtn area-Shanxi Prov.	24	1.81	Zhong & Ma (1997)
Dashiling Fm (Nandaxian Mbr)	Wutai Mtn area-Shanxi Prov.	24	1.91	Zhong & Ma (1997)
Dashiling Fm (Nandaxian Mbr)	Wutai Mtn area-Shanxi Prov.	24	1.44	Zhong & Ma (1997)
Dashiling Fm (Nandaxian Mbr)	Wutai Mtn area-Shanxi Prov.	24	1.47	Zhong & Ma (1997)
Dashiling Fm (Nandaxian Mbr)	Wutai Mtn area-Shanxi Prov.	24	1.71	Zhong & Ma (1997)
Dashiling Fm (Nandaxian Mbr)	Wutai Mtn area-Shanxi Prov.	24	1.94	Zhong & Ma (1997)
Dashiling Fm (Nandaxian Mbr)	Wutai Mtn area-Shanxi Prov.	24	1.89	Zhong & Ma (1997)
Bruce Limestone	Elliot Lake, Ontario	23	-1.52	Veizer et al. (1992a)
Bruce Limestone	Elliot Lake, Ontario	23	-1.41	Veizer et al. (1992a)
Bruce Limestone	Elliot Lake, Ontario	23	-1.25	Veizer et al. (1992a)
Bruce Limestone	Elliot Lake, Ontario	23	-1.24	Veizer et al. (1992a)
Bruce Limestone	Elliot Lake, Ontario	23	-1.46	Veizer et al. (1992a)
Bruce Limestone	Elliot Lake, Ontario	23	-1.46	Veizer et al. (1992a)
Bruce Limestone	Elliot Lake, Ontario	23	-1.29	Veizer et al. (1992a)
Bruce Limestone	Elliot Lake, Ontario	23	-1.24	Veizer et al. (1992a)
Bruce Limestone	Elliot Lake, Ontario	23	-1.23	Veizer et al. (1992a)
Bruce Limestone	Elliot Lake, Ontario	23	-1.2	Veizer et al. (1992a)
Bruce Limestone	Elliot Lake, Ontario	23	-1.22	Veizer et al. (1992a)
Bruce Limestone	Elliot Lake, Ontario	23	-1.58	Veizer et al. (1992a)
Bruce Limestone	Elliot Lake, Ontario	23	-1.38	Veizer et al. (1992a)
Bruce Limestone	Elliot Lake, Ontario	23	-1.4	Veizer et al. (1992a)
Bruce Limestone	Elliot Lake, Ontario	23	-1.68	Veizer et al. (1992a)
Bruce Limestone	Elliot Lake, Ontario	23	-1.5	Veizer et al. (1992a)
Bruce Limestone	Elliot Lake, Ontario	23	-1.38	Veizer et al. (1992a)
Bruce Limestone	Elliot Lake, Ontario	23	-1.33	Veizer et al. (1992a)
Bruce Limestone	Elliot Lake, Ontario	23	-1.99	Veizer et al. (1992a)
Bruce Limestone	Elliot Lake, Ontario	23	-0.94	Veizer et al. (1992a)
Bruce Limestone	Elliot Lake, Ontario	23	-0.89	Veizer et al. (1992a)
Bruce Limestone	Elliot Lake, Ontario	23	-1.25	Veizer et al. (1992a)
Bruce Limestone	Elliot Lake, Ontario	23	-1.16	Veizer et al. (1992a)
Bruce Limestone	Elliot Lake, Ontario	23	-1.48	Veizer et al. (1992a)
Bruce Limestone	Elliot Lake, Ontario	23	-1.09	Veizer et al. (1992a)
Bruce Limestone	Elliot Lake, Ontario	23	-0.84	Veizer et al. (1992a)
Bruce Limestone	Elliot Lake, Ontario	23	-1.24	Veizer et al. (1992a)
Bruce Limestone	Elliot Lake, Ontario	23	-1.02	Veizer et al. (1992a)
Bruce Limestone	Elliot Lake, Ontario	23	-0.94	Veizer et al. (1992a)
Bruce Limestone	Elliot Lake, Ontario	23	-0.83	Veizer et al. (1992a)
Bruce Limestone	Elliot Lake, Ontario	23	-0.96	Veizer et al. (1992a)
Bruce Limestone	Elliot Lake, Ontario	23	-1.11	Veizer et al. (1992a)
Bruce Limestone	Elliot Lake, Ontario	23	-0.71	Veizer et al. (1992a)
Bruce Limestone	Elliot Lake, Ontario	23	-1	Veizer et al. (1992a)
Upper Duitschland Fm	Transvaal Basin	23	8.4	Buick et al. (1998)
Upper Duitschland Fm	Transvaal Basin	23	8.5	Buick et al. (1998)
Upper Duitschland Fm	Transvaal Basin	23	9.1	Buick et al. (1998)
Upper Duitschland Fm	Transvaal Basin	23	8.5	Buick et al. (1998)
Upper Duitschland Fm	Transvaal Basin	23	6.9	Buick et al. (1998)
Upper Duitschland Fm	Transvaal Basin	23	5.8	Buick et al. (1998)
Upper Duitschland Fm	Transvaal Basin	23	6.7	Buick et al. (1998)
Upper Duitschland Fm	Transvaal Basin	23	6.8	Buick et al. (1998)
Upper Duitschland Fm	Transvaal Basin	23	7.1	Buick et al. (1998)
Upper Duitschland Fm	Transvaal Basin	23	6.9	Buick et al. (1998)
Upper Duitschland Fm	Transvaal Basin	23	8.2	Buick et al. (1998)
Upper Duitschland Fm	Transvaal Basin	23	9.3	Buick et al. (1998)
Upper Duitschland Fm	Transvaal Basin	23	7.5	Buick et al. (1998)
Upper Duitschland Fm	Transvaal Basin	23	7.4	Buick et al. (1998)
Upper Duitschland Fm	Transvaal Basin	23	6.4	Buick et al. (1998)
Upper Duitschland Fm	Transvaal Basin	23	6.5	Buick et al. (1998)
Upper Duitschland Fm	Transvaal Basin	23	5	Buick et al. (1998)
Upper Duitschland Fm	Transvaal Basin	23	6.3	Buick et al. (1998)
Upper Duitschland Fm	Transvaal Basin	23	3.6	Buick et al. (1998)
Upper Duitschland Fm	Transvaal Basin	23	4.8	Buick et al. (1998)
Upper Duitschland Fm	Transvaal Basin	23	5	Buick et al. (1998)
Upper Duitschland Fm	Transvaal Basin	23	4.7	Buick et al. (1998)
Upper Duitschland Fm	Transvaal Basin	23	5.8	Buick et al. (1998)
Upper Duitschland Fm	Transvaal Basin	23	5.5	Buick et al. (1998)
Upper Duitschland Fm	Transvaal Basin	23	5.2	Buick et al. (1998)
Upper Duitschland Fm	Transvaal Basin	23	4.2	Buick et al. (1998)
Upper Duitschland Fm	Transvaal Basin	23	6.3	Buick et al. (1998)
Upper Duitschland Fm	Transvaal Basin	23	5.3	Buick et al. (1998)
Upper Duitschland Fm	Transvaal Basin	23	6	Buick et al. (1998)
Upper Duitschland Fm	Transvaal Basin	23	6.8	Buick et al. (1998)
Upper Duitschland Fm	Transvaal Basin	23	6.1	Buick et al. (1998)
Upper Duitschland Fm	Transvaal Basin	23	5.8	Buick et al. (1998)
Upper Duitschland Fm	Transvaal Basin	23	5.8	Buick et al. (1998)
Upper Duitschland Fm	Transvaal Basin	23	6	Bekker et al. (2001)
Upper Duitschland Fm	Transvaal Basin	23	6	Bekker et al. (2001)
Upper Duitschland Fm	Transvaal Basin	23	5.2	Bekker et al. (2001)
Upper Duitschland Fm	Transvaal Basin	23	4.4	Bekker et al. (2001)
Upper Duitschland Fm	Transvaal Basin	23	8.1	Bekker et al. (2001)
Upper Duitschland Fm	Transvaal Basin	23	7.9	Bekker et al. (2001)
Upper Duitschland Fm	Transvaal Basin	23	5.5	Bekker et al. (2001)
Upper Duitschland Fm	Transvaal Basin	23	5.6	Bekker et al. (2001)
Upper Duitschland Fm	Transvaal Basin	23	2.3	Bekker et al. (2001)
Upper Duitschland Fm	Transvaal Basin	23	2.3	Bekker et al. (2001)
Upper Duitschland Fm	Transvaal Basin	23	6.8	Bekker et al. (2001)
Upper Duitschland Fm	Transvaal Basin	23	7.9	Bekker et al. (2001)
Upper Duitschland Fm	Transvaal Basin	23	6	Bekker et al. (2001)
Upper Duitschland Fm	Transvaal Basin	23	6	Bekker et al. (2001)
Upper Duitschland Fm	Transvaal Basin	23	6.1	Bekker et al. (2001)
Upper Duitschland Fm	Transvaal Basin	23	8.7	Bekker et al. (2001)
Upper Duitschland Fm	Transvaal Basin	23	9.5	Bekker et al. (2001)
Upper Duitschland Fm	Transvaal Basin	23	10.1	Bekker et al. (2001)
Upper Duitschland Fm	Transvaal Basin	23	8.9	Bekker et al. (2001)
Upper Duitschland Fm	Transvaal Basin	23	9.4	Bekker et al. (2001)
Upper Duitschland Fm	Transvaal Basin	23	8.1	Bekker et al. (2001)
Upper Duitschland Fm	Transvaal Basin	23	2.4	Bekker et al. (2001)
Upper Duitschland Fm	Transvaal Basin	23	-2	Bekker et al. (2001)
Upper Duitschland Fm	Transvaal Basin	23	2	Bekker et al. (2001)
Upper Duitschland Fm	Transvaal Basin	23	6.5	Guo et al. (2009)
Upper Duitschland Fm	Transvaal Basin	23	6.1	Guo et al. (2009)
Upper Duitschland Fm	Transvaal Basin	23	7.8	Guo et al. (2009)
Upper Duitschland Fm	Transvaal Basin	23	6.5	Guo et al. (2009)
Upper Duitschland Fm	Transvaal Basin	23	1.6	Guo et al. (2009)
Upper Duitschland Fm	Transvaal Basin	23	6.8	Guo et al. (2009)
Upper Duitschland Fm	Transvaal Basin	23	5.7	Guo et al. (2009)
Upper Duitschland Fm	Transvaal Basin	23	6.7	Guo et al. (2009)
Upper Duitschland Fm	Transvaal Basin	23	2.5	Guo et al. (2009)
Upper Duitschland Fm	Transvaal Basin	23	3.8	Guo et al. (2009)
Upper Duitschland Fm	Transvaal Basin	23	6	Guo et al. (2009)
Upper Duitschland Fm	Transvaal Basin	23	6.14	Guo et al. (2009)
Upper Duitschland Fm	Transvaal Basin	23	2.4	Guo et al. (2009)
Upper Duitschland Fm	Transvaal Basin	23	5.31	Guo et al. (2009)
Upper Duitschland Fm	Transvaal Basin	23	2.6	Guo et al. (2009)
Upper Duitschland Fm	Transvaal Basin	23	2.21	Frauenstein et al. (2009)
Upper Duitschland Fm	Transvaal Basin	23	2.33	Frauenstein et al. (2009)
Upper Duitschland Fm	Transvaal Basin	23	2.41	Frauenstein et al. (2009)
Upper Duitschland Fm	Transvaal Basin	23	2.46	Frauenstein et al. (2009)
Upper Duitschland Fm	Transvaal Basin	23	2.55	Frauenstein et al. (2009)
Upper Duitschland Fm	Transvaal Basin	23	2.87	Frauenstein et al. (2009)
Upper Duitschland Fm	Transvaal Basin	23	3.94	Frauenstein et al. (2009)
Upper Duitschland Fm	Transvaal Basin	23	5.62	Frauenstein et al. (2009)
Upper Duitschland Fm	Transvaal Basin	23	0.94	Frauenstein et al. (2009)
Upper Duitschland Fm	Transvaal Basin	23	7.7	Frauenstein et al. (2009)
Upper Duitschland Fm	Transvaal Basin	23	2.57	Frauenstein et al. (2009)
Upper Duitschland Fm	Transvaal Basin	23	2.43	Frauenstein et al. (2009)
Upper Duitschland Fm	Transvaal Basin	23	2.38	Frauenstein et al. (2009)
Upper Duitschland Fm	Transvaal Basin	23	2.56	Frauenstein et al. (2009)
Upper Duitschland Fm	Transvaal Basin	23	7.54	Frauenstein et al. (2009)
Upper Duitschland Fm	Transvaal Basin	23	8.01	Frauenstein et al. (2009)
Upper Duitschland Fm	Transvaal Basin	23	8.13	Frauenstein et al. (2009)
Upper Duitschland Fm	Transvaal Basin	23	4.57	Frauenstein et al. (2009)
Upper Duitschland Fm	Transvaal Basin	23	3.27	Frauenstein et al. (2009)
Upper Duitschland Fm	Transvaal Basin	23	7.98	Frauenstein et al. (2009)
Upper Duitschland Fm	Transvaal Basin	23	6.18	Frauenstein et al. (2009)
Upper Duitschland Fm	Transvaal Basin	23	5.99	Frauenstein et al. (2009)
Upper Duitschland Fm	Transvaal Basin	23	5.87	Frauenstein et al. (2009)
Upper Duitschland Fm	Transvaal Basin	23	5.76	Frauenstein et al. (2009)
Upper Duitschland Fm	Transvaal Basin	23	5.99	Frauenstein et al. (2009)
Upper Duitschland Fm	Transvaal Basin	23	5.97	Frauenstein et al. (2009)
Upper Duitschland Fm	Transvaal Basin	23	5.25	Frauenstein et al. (2009)
Upper Duitschland Fm	Transvaal Basin	23	6.18	Frauenstein et al. (2009)
Upper Duitschland Fm	Transvaal Basin	23	5.47	Frauenstein et al. (2009)
Upper Duitschland Fm	Transvaal Basin	23	9.47	Frauenstein et al. (2009)
Upper Duitschland Fm	Transvaal Basin	23	6.08	Frauenstein et al. (2009)
Upper Duitschland Fm	Transvaal Basin	23	7.21	Frauenstein et al. (2009)
Upper Duitschland Fm	Transvaal Basin	23	7.65	Frauenstein et al. (2009)
Upper Duitschland Fm	Transvaal Basin	23	0.95	Frauenstein et al. (2009)
Upper Duitschland Fm	Transvaal Basin	23	-2.16	Frauenstein et al. (2009)
Upper Duitschland Fm	Transvaal Basin	23	6.87	Frauenstein et al. (2009)
Upper Duitschland Fm	Transvaal Basin	23	2.27	Frauenstein et al. (2009)
Upper Duitschland Fm	Transvaal Basin	23	1.39	Frauenstein et al. (2009)
Upper Duitschland Fm	Transvaal Basin	23	1.49	Frauenstein et al. (2009)
Upper Duitschland Fm	Transvaal Basin	23	-0.77	Frauenstein et al. (2009)
Upper Duitschland Fm	Transvaal Basin	23	9.67	Frauenstein et al. (2009)
Upper Duitschland Fm	Transvaal Basin	23	9.43	Frauenstein et al. (2009)
Upper Duitschland Fm	Transvaal Basin	23	10.16	Frauenstein et al. (2009)
Upper Duitschland Fm	Transvaal Basin	23	9.65	Frauenstein et al. (2009)
Upper Duitschland Fm	Transvaal Basin	23	9.35	Frauenstein et al. (2009)
Upper Duitschland Fm	Transvaal Basin	23	7.14	Frauenstein et al. (2009)
Upper Duitschland Fm	Transvaal Basin	23	1.3	Frauenstein et al. (2009)
Upper Duitschland Fm	Transvaal Basin	23	-1.06	Frauenstein et al. (2009)
Upper Duitschland Fm	Transvaal Basin	23	1.84	Frauenstein et al. (2009)
Upper Duitschland Fm	Transvaal Basin	23	1.8	Frauenstein et al. (2009)
Upper Duitschland Fm	Transvaal Basin	23	2.43	Frauenstein et al. (2009)
Upper Duitschland Fm	Transvaal Basin	23	2.06	Frauenstein et al. (2009)
Upper Duitschland Fm	Transvaal Basin	23	1.92	Frauenstein et al. (2009)
Upper Duitschland Fm	Transvaal Basin	23	2.3	Frauenstein et al. (2009)
Upper Duitschland Fm	Transvaal Basin	23	2.25	Frauenstein et al. (2009)
Upper Duitschland Fm	Transvaal Basin	23	2.2	Frauenstein et al. (2009)
Upper Duitschland Fm	Transvaal Basin	23	2.15	Frauenstein et al. (2009)
Upper Duitschland Fm	Transvaal Basin	23	10.07	Frauenstein et al. (2009)
Upper Duitschland Fm	Transvaal Basin	23	1.43	Frauenstein et al. (2009)
Upper Duitschland Fm	Transvaal Basin	23	9.64	Frauenstein et al. (2009)
Upper Duitschland Fm	Transvaal Basin	23	8.36	Frauenstein et al. (2009)
Rantamaa Fm	Perapohja Schist Belt	22	6.86	Karhu (1993)
Rantamaa Fm	Perapohja Schist Belt	22	7.19	Karhu (1993)
Rantamaa Fm	Perapohja Schist Belt	22	8.49	Karhu (1993)
Rantamaa Fm	Perapohja Schist Belt	22	5.44	Karhu (1993)
Rantamaa Fm	Perapohja Schist Belt	22	7.41	Karhu (1993)
Rantamaa Fm	Perapohja Schist Belt	22	11.29	Karhu (1993)
Rantamaa Fm	Perapohja Schist Belt	22	9.63	Karhu (1993)
Rantamaa Fm	Perapohja Schist Belt	22	11.44	Karhu (1993)
Rantamaa Fm	Perapohja Schist Belt	22	11.13	Karhu (1993)
Rantamaa Fm	Perapohja Schist Belt	22	2.5	Karhu (1993)
Rantamaa Fm	Perapohja Schist Belt	22	5.16	Karhu (1993)
Rantamaa Fm	Perapohja Schist Belt	22	2.91	Karhu (1993)
Rantamaa Fm	Perapohja Schist Belt	22	4.14	Karhu (1993)
Rantamaa Fm	Perapohja Schist Belt	22	3.63	Karhu (1993)
Alto Moxotó Terrane (Itatuba)	Borboremba, Brazil	22	8.8	Santos et al. (2013)
Alto Moxotó Terrane (Itatuba)	Borboremba, Brazil	22	7.7	Santos et al. (2013)
Alto Moxotó Terrane (Itatuba)	Borboremba, Brazil	22	5.8	Santos et al. (2013)
Alto Moxotó Terrane (Itatuba)	Borboremba, Brazil	22	5.5	Santos et al. (2013)
Alto Moxotó Terrane (Itatuba)	Borboremba, Brazil	22	7.2	Santos et al. (2013)
Alto Moxotó Terrane (Itatuba)	Borboremba, Brazil	22	7.5	Santos et al. (2013)
Alto Moxotó Terrane (Itatuba)	Borboremba, Brazil	22	6.8	Santos et al. (2013)
Alto Moxotó Terrane (Itatuba)	Borboremba, Brazil	22	6.1	Santos et al. (2013)
Alto Moxotó Terrane (Itatuba)	Borboremba, Brazil	22	5.9	Santos et al. (2013)
Alto Moxotó Terrane (Itatuba)	Borboremba, Brazil	22	4.7	Santos et al. (2013)
Alto Moxotó Terrane (Itatuba)	Borboremba, Brazil	22	4.8	Santos et al. (2013)
Alto Moxotó Terrane (Itatuba)	Borboremba, Brazil	22	5.4	Santos et al. (2013)
Alto Moxotó Terrane (Itatuba)	Borboremba, Brazil	22	6.5	Santos et al. (2013)
Alto Moxotó Terrane (Itatuba)	Borboremba, Brazil	22	6.6	Santos et al. (2013)
Alto Moxotó Terrane (Itatuba)	Borboremba, Brazil	22	-0.8	Santos et al. (2013)
Alto Moxotó Terrane (Itatuba)	Borboremba, Brazil	22	7	Santos et al. (2013)
Alto Moxotó Terrane (Itatuba)	Borboremba, Brazil	22	5.7	Santos et al. (2013)
Alto Moxotó Terrane (Itatuba)	Borboremba, Brazil	22	7.6	Santos et al. (2013)
Alto Moxotó Terrane (Itatuba)	Borboremba, Brazil	22	6.2	Santos et al. (2013)
Alto Moxotó Terrane (Itatuba)	Borboremba, Brazil	22	7.4	Santos et al. (2013)
Alto Moxotó Terrane (Itatuba)	Borboremba, Brazil	22	2.1	Santos et al. (2013)
Alto Moxotó Terrane (Itatuba)	Borboremba, Brazil	22	2.4	Santos et al. (2013)
Alto Moxotó Terrane (Itatuba)	Borboremba, Brazil	22	2.9	Santos et al. (2013)
Alto Moxotó Terrane (Itatuba)	Borboremba, Brazil	22	3.8	Santos et al. (2013)
Alto Moxotó Terrane (Itatuba)	Borboremba, Brazil	22	7.2	Santos et al. (2013)
Alto Moxotó Terrane (Itatuba)	Borboremba, Brazil	22	8	Santos et al. (2013)
Alto Moxotó Terrane (Itatuba)	Borboremba, Brazil	22	5.5	Santos et al. (2013)
Alto Moxotó Terrane (Itatuba)	Borboremba, Brazil	22	5.6	Santos et al. (2013)
Alto Moxotó Terrane (Itatuba)	Borboremba, Brazil	22	4.5	Santos et al. (2013)
Alto Moxotó Terrane (Itatuba)	Borboremba, Brazil	22	2.5	Santos et al. (2013)
Alto Moxotó Terrane (Itatuba)	Borboremba, Brazil	22	4.1	Santos et al. (2013)
Alto Moxotó Terrane (Itatuba)	Borboremba, Brazil	22	1.9	Santos et al. (2013)
Alto Moxotó Terrane (Itatuba)	Borboremba, Brazil	22	6.9	Santos et al. (2013)
Alto Moxotó Terrane (Itatuba)	Borboremba, Brazil	22	1.2	Santos et al. (2013)
Alto Moxotó Terrane (Itatuba)	Borboremba, Brazil	22	6.1	Santos et al. (2013)
Alto Moxotó Terrane (Itatuba)	Borboremba, Brazil	22	5.5	Santos et al. (2013)
Alto Moxotó Terrane (Itatuba)	Borboremba, Brazil	22	5.6	Santos et al. (2013)
Alto Moxotó Terrane (Itatuba)	Borboremba, Brazil	22	5.5	Santos et al. (2013)
Alto Moxotó Terrane (Itatuba)	Borboremba, Brazil	22	6.3	Santos et al. (2013)
Alto Moxotó Terrane (Itatuba)	Borboremba, Brazil	22	6.2	Santos et al. (2013)
Alto Moxotó Terrane (Itatuba)	Borboremba, Brazil	22	4.8	Santos et al. (2013)
Alto Moxotó Terrane (Itatuba)	Borboremba, Brazil	22	4.2	Santos et al. (2013)
Alto Moxotó Terrane (Itatuba)	Borboremba, Brazil	22	6.2	Santos et al. (2013)
Alto Moxotó Terrane (Itatuba)	Borboremba, Brazil	22	5.7	Santos et al. (2013)
Alto Moxotó Terrane (Itatuba)	Borboremba, Brazil	22	6.3	Santos et al. (2013)
Alto Moxotó Terrane (Itatuba)	Borboremba, Brazil	22	6.2	Santos et al. (2013)
Alto Moxotó Terrane (Itatuba)	Borboremba, Brazil	22	4.6	Santos et al. (2013)
Alto Moxotó Terrane (Itatuba)	Borboremba, Brazil	22	3.7	Santos et al. (2013)
Alto Moxotó Terrane (Itatuba)	Borboremba, Brazil	22	4	Santos et al. (2013)
Alto Moxotó Terrane (Itatuba)	Borboremba, Brazil	22	7	Santos et al. (2013)
Alto Moxotó Terrane (Itatuba)	Borboremba, Brazil	22	6.3	Santos et al. (2013)
Alto Moxotó Terrane (Itatuba)	Borboremba, Brazil	22	5	Santos et al. (2013)
Alto Moxotó Terrane (Itatuba)	Borboremba, Brazil	22	-3.3	Santos et al. (2013)
Alto Moxotó Terrane (Itatuba)	Borboremba, Brazil	22	7.7	Santos et al. (2013)
Middle Lapponian Gr	Kittila-Kolari	22	5.29	Karhu (1993)
Middle Lapponian Gr	Kittila-Kolari	22	5.92	Karhu (1993)
Middle Lapponian Gr	Kittila-Kolari	22	6.8	Karhu (1993)
Middle Lapponian Gr	Kittila-Kolari	22	5.45	Karhu (1993)
Dolomite Fm	Kuusamo Schist Belt	22	15.07	Karhu (1993)
Dolomite Fm	Kuusamo Schist Belt	22	8.21	Karhu (1993)
Dolomite Fm	Kuusamo Schist Belt	22	10.41	Karhu (1993)
Dolomite Fm	Kuusamo Schist Belt	22	10.61	Karhu (1993)
Dolomite Fm	Kuusamo Schist Belt	22	10.98	Karhu (1993)
Dolomite Fm	Kuusamo Schist Belt	22	8.17	Karhu (1993)
Dolomite Fm	Kuusamo Schist Belt	22	11.2	Karhu (1993)
Gordon Lake Fm	Lake Superior area	22	7.2	Bekker et al. (2006)
Gordon Lake Fm	Lake Superior area	22	7.3	Bekker et al. (2006)
Gordon Lake Fm	Lake Superior area	22	6.4	Bekker et al. (2006)
Gordon Lake Fm	Lake Superior area	22	6.9	Bekker et al. (2006)
Gordon Lake Fm	Lake Superior area	22	8.2	Bekker et al. (2006)
Gordon Lake Fm	Lake Superior area	22	5	Bekker et al. (2006)
Gordon Lake Fm	Lake Superior area	22	5	Bekker et al. (2006)
Gordon Lake Fm	Lake Superior area	22	6.2	Bekker et al. (2006)
Gordon Lake Fm	Lake Superior area	22	5.8	Bekker et al. (2006)
Gordon Lake Fm	Lake Superior area	22	8	Bekker et al. (2006)
Gordon Lake Fm	Lake Superior area	22	7.7	Bekker et al. (2006)
Gordon Lake Fm	Lake Superior area	22	7.1	Bekker et al. (2006)
Gordon Lake Fm	Lake Superior area	22	7.6	Bekker et al. (2006)
Gordon Lake Fm	Lake Superior area	22	8.2	Bekker et al. (2006)
Gordon Lake Fm	Lake Superior area	22	2.1	Bekker et al. (2006)
Gordon Lake Fm	Lake Superior area	22	5.7	Bekker et al. (2006)
Gordon Lake Fm	Lake Superior area	22	5.9	Bekker et al. (2006)
Gordon Lake Fm	Lake Superior area	22	5.6	Bekker et al. (2006)
Gordon Lake Fm	Lake Superior area	22	5.8	Bekker et al. (2006)
Gordon Lake Fm	Lake Superior area	22	5.6	Bekker et al. (2006)
Gordon Lake Fm	Lake Superior area	22	5.5	Bekker et al. (2006)
Gordon Lake Fm	Lake Superior area	22	5.8	Bekker et al. (2006)
Gordon Lake Fm	Lake Superior area	22	6.2	Bekker et al. (2006)
Gordon Lake Fm	Lake Superior area	22	5.5	Bekker et al. (2006)
Gordon Lake Fm	Lake Superior area	22	5.5	Bekker et al. (2006)
Gordon Lake Fm	Lake Superior area	22	7.5	Bekker et al. (2006)
Gordon Lake Fm	Lake Superior area	22	2.6	Bekker et al. (2006)
Gordon Lake Fm	Lake Superior area	22	4.3	Bekker et al. (2006)
Gordon Lake Fm	Lake Superior area	22	4.2	Bekker et al. (2006)
Gordon Lake Fm	Lake Superior area	22	3.6	Bekker et al. (2006)
Gordon Lake Fm	Lake Superior area	22	4.1	Bekker et al. (2006)
Gordon Lake Fm	Lake Superior area	22	-1	Bekker et al. (2006)
Gordon Lake Fm	Lake Superior area	22	4.4	Bekker et al. (2006)
Gordon Lake Fm	Lake Superior area	22	3.8	Bekker et al. (2006)
Gordon Lake Fm	Lake Superior area	22	3.9	Bekker et al. (2006)
Gordon Lake Fm	Lake Superior area	22	2.9	Bekker et al. (2006)
Gordon Lake Fm	Lake Superior area	22	3.4	Bekker et al. (2006)
Gordon Lake Fm	Lake Superior area	22	1.3	Bekker et al. (2006)
Gordon Lake Fm	Lake Superior area	22	4.6	Bekker et al. (2006)
Kona Dolomite	Lake Superior area	22	6.3	Bekker et al. (2006)
Kona Dolomite	Lake Superior area	22	6.1	Bekker et al. (2006)
Kona Dolomite	Lake Superior area	22	6.1	Bekker et al. (2006)
Kona Dolomite	Lake Superior area	22	5.9	Bekker et al. (2006)
Kona Dolomite	Lake Superior area	22	6.2	Bekker et al. (2006)
Kona Dolomite	Lake Superior area	22	6	Bekker et al. (2006)
Kona Dolomite	Lake Superior area	22	6.9	Bekker et al. (2006)
Kona Dolomite	Lake Superior area	22	6.7	Bekker et al. (2006)
Kona Dolomite	Lake Superior area	22	5.5	Bekker et al. (2006)
Kona Dolomite	Lake Superior area	22	6	Bekker et al. (2006)
Kona Dolomite	Lake Superior area	22	2.6	Bekker et al. (2006)
Kona Dolomite	Lake Superior area	22	5.6	Bekker et al. (2006)
Kona Dolomite	Lake Superior area	22	8.2	Bekker et al. (2006)
Kona Dolomite	Lake Superior area	22	5.3	Bekker et al. (2006)
Kona Dolomite	Lake Superior area	22	8	Bekker et al. (2006)
Kona Dolomite	Lake Superior area	22	8.3	Bekker et al. (2006)
Kona Dolomite	Lake Superior area	22	4.6	Bekker et al. (2006)
Kona Dolomite	Lake Superior area	22	4.5	Bekker et al. (2006)
Kona Dolomite	Lake Superior area	22	2.4	Bekker et al. (2006)
Kona Dolomite	Lake Superior area	22	3.7	Bekker et al. (2006)
Kona Dolomite	Lake Superior area	22	3.6	Bekker et al. (2006)
Kona Dolomite	Lake Superior area	22	5.7	Bekker et al. (2006)
Kona Dolomite	Lake Superior area	22	5.4	Bekker et al. (2006)
Kona Dolomite	Lake Superior area	22	5.3	Bekker et al. (2006)
Kona Dolomite	Lake Superior area	22	4.3	Bekker et al. (2006)
Kona Dolomite	Lake Superior area	22	1.9	Bekker et al. (2006)
Kona Dolomite	Lake Superior area	22	2.4	Bekker et al. (2006)
Kona Dolomite	Lake Superior area	22	7.2	Bekker et al. (2006)
Kona Dolomite	Lake Superior area	22	5.8	Bekker et al. (2006)
Kona Dolomite	Lake Superior area	22	6.5	Bekker et al. (2006)
Kona Dolomite	Lake Superior area	22	8.3	Bekker et al. (2006)
Kona Dolomite	Lake Superior area	22	5.8	Bekker et al. (2006)
Kona Dolomite	Lake Superior area	22	4	Bekker et al. (2006)
Kona Dolomite	Lake Superior area	22	6.4	Bekker et al. (2006)
Kona Dolomite	Lake Superior area	22	6.5	Bekker et al. (2006)
Kona Dolomite	Lake Superior area	22	7.1	Bekker et al. (2006)
Kona Dolomite	Lake Superior area	22	6.4	Bekker et al. (2006)
Kona Dolomite	Lake Superior area	22	6.4	Bekker et al. (2006)
Kona Dolomite	Lake Superior area	22	3.3	Bekker et al. (2006)
Kona Dolomite	Lake Superior area	22	6.8	Bekker et al. (2006)
Kona Dolomite	Lake Superior area	22	7.1	Bekker et al. (2006)
Kona Dolomite	Lake Superior area	22	6.6	Bekker et al. (2006)
Kona Dolomite	Lake Superior area	22	7.9	Bekker et al. (2006)
Kona Dolomite	Lake Superior area	22	9.5	Bekker et al. (2006)
Kona Dolomite	Lake Superior area	22	6.5	Bekker et al. (2006)
Kona Dolomite	Lake Superior area	22	7.2	Bekker et al. (2006)
Kona Dolomite	Lake Superior area	22	6.6	Bekker et al. (2006)
Kona Dolomite	Lake Superior area	22	6.1	Bekker et al. (2006)
Kona Dolomite	Lake Superior area	22	7.2	Bekker et al. (2006)
Kona Dolomite	Lake Superior area	22	7.5	Bekker et al. (2006)
Kona Dolomite	Lake Superior area	22	7.4	Bekker et al. (2006)
Kona Dolomite	Lake Superior area	22	7.4	Bekker et al. (2006)
Kona Dolomite	Lake Superior area	22	7.4	Bekker et al. (2006)
Kona Dolomite	Lake Superior area	22	6.8	Bekker et al. (2006)
Kona Dolomite	Lake Superior area	22	9.4	Bekker et al. (2006)
Kona Dolomite	Lake Superior area	22	8.9	Bekker et al. (2006)
Kona Dolomite	Lake Superior area	22	6.6	Bekker et al. (2006)
Kona Dolomite	Lake Superior area	22	7	Bekker et al. (2006)
Kona Dolomite	Lake Superior area	22	6.8	Bekker et al. (2006)
Kona Dolomite	Lake Superior area	22	7.6	Bekker et al. (2006)
Kona Dolomite	Lake Superior area	22	8	Bekker et al. (2006)
Kona Dolomite	Lake Superior area	22	8	Bekker et al. (2006)
Kona Dolomite	Lake Superior area	22	6.2	Bekker et al. (2006)
Kona Dolomite	Lake Superior area	22	7.5	Bekker et al. (2006)
Kona Dolomite	Lake Superior area	22	7.3	Bekker et al. (2006)
Kona Dolomite	Lake Superior area	22	7.4	Bekker et al. (2006)
Kona Dolomite	Lake Superior area	22	7.1	Bekker et al. (2006)
Kona Dolomite	Lake Superior area	22	7.1	Bekker et al. (2006)
Kona Dolomite	Lake Superior area	22	7.1	Bekker et al. (2006)
Kona Dolomite	Lake Superior area	22	7.1	Bekker et al. (2006)
Kona Dolomite	Lake Superior area	22	7.6	Bekker et al. (2006)
Kona Dolomite	Lake Superior area	22	7.3	Bekker et al. (2006)
Kona Dolomite	Lake Superior area	22	6.9	Bekker et al. (2006)
Kona Dolomite	Lake Superior area	22	6	Bekker et al. (2006)
Kona Dolomite	Lake Superior area	22	6.7	Bekker et al. (2006)
Kona Dolomite	Lake Superior area	22	6.6	Bekker et al. (2006)
Kona Dolomite	Lake Superior area	22	6.2	Bekker et al. (2006)
Kona Dolomite	Lake Superior area	22	6.1	Bekker et al. (2006)
Kona Dolomite	Lake Superior area	22	5.7	Bekker et al. (2006)
Kona Dolomite	Lake Superior area	22	7.1	Bekker et al. (2006)
Kona Dolomite	Lake Superior area	22	6.8	Bekker et al. (2006)
Kona Dolomite	Lake Superior area	22	6.3	Bekker et al. (2006)
Kona Dolomite	Lake Superior area	22	6.5	Bekker et al. (2006)
Kona Dolomite	Lake Superior area	22	6.5	Bekker et al. (2006)
Kona Dolomite	Lake Superior area	22	5.8	Bekker et al. (2006)
Kona Dolomite	Lake Superior area	22	6.4	Bekker et al. (2006)
Kona Dolomite	Lake Superior area	22	5.9	Bekker et al. (2006)
Kona Dolomite	Lake Superior area	22	7	Bekker et al. (2006)
Kona Dolomite	Lake Superior area	22	6.1	Bekker et al. (2006)
Kona Dolomite	Lake Superior area	22	6.1	Bekker et al. (2006)
Kona Dolomite	Lake Superior area	22	3.4	Bekker et al. (2006)
Kona Dolomite	Lake Superior area	22	6.4	Bekker et al. (2006)
Kona Dolomite	Lake Superior area	22	6.7	Bekker et al. (2006)
Kona Dolomite	Lake Superior area	22	6.6	Bekker et al. (2006)
Kona Dolomite	Lake Superior area	22	6.4	Bekker et al. (2006)
Kona Dolomite	Lake Superior area	22	6.6	Bekker et al. (2006)
Kona Dolomite	Lake Superior area	22	6	Bekker et al. (2006)
Kona Dolomite	Lake Superior area	22	5.9	Bekker et al. (2006)
Kona Dolomite	Lake Superior area	22	5.8	Bekker et al. (2006)
Kona Dolomite	Lake Superior area	22	5.8	Bekker et al. (2006)
Kona Dolomite	Lake Superior area	22	4.3	Bekker et al. (2006)
Kona Dolomite	Lake Superior area	22	5.9	Bekker et al. (2006)
Kona Dolomite	Lake Superior area	22	5.7	Bekker et al. (2006)
Kona Dolomite	Lake Superior area	22	5.4	Bekker et al. (2006)
Kona Dolomite	Lake Superior area	22	5	Bekker et al. (2006)
Randville Fm	Lake Superior area	22	2.1	Bekker et al. (2006)
Randville Fm	Lake Superior area	22	1.1	Bekker et al. (2006)
Randville Fm	Lake Superior area	22	0.5	Bekker et al. (2006)
Randville Fm	Lake Superior area	22	2.6	Bekker et al. (2006)
Randville Fm	Lake Superior area	22	3.1	Bekker et al. (2006)
Randville Fm	Lake Superior area	22	3.1	Bekker et al. (2006)
Randville Fm	Lake Superior area	22	2.9	Bekker et al. (2006)
Randville Fm	Lake Superior area	22	0.2	Bekker et al. (2006)
Randville Fm	Lake Superior area	22	0.2	Bekker et al. (2006)
Randville Fm	Lake Superior area	22	0.8	Bekker et al. (2006)
Randville Fm	Lake Superior area	22	1.4	Bekker et al. (2006)
Randville Fm	Lake Superior area	22	1.3	Bekker et al. (2006)
Randville Fm	Lake Superior area	22	1.5	Bekker et al. (2006)
Randville Fm	Lake Superior area	22	1.4	Bekker et al. (2006)
Randville Fm	Lake Superior area	22	1.3	Bekker et al. (2006)
Randville Fm	Lake Superior area	22	1.3	Bekker et al. (2006)
Randville Fm	Lake Superior area	22	1.2	Bekker et al. (2006)
Randville Fm	Lake Superior area	22	1.4	Bekker et al. (2006)
Randville Fm	Lake Superior area	22	1.1	Bekker et al. (2006)
Randville Fm	Lake Superior area	22	-0.2	Bekker et al. (2006)
Randville Fm	Lake Superior area	22	-0.2	Bekker et al. (2006)
Randville Fm	Lake Superior area	22	-0.3	Bekker et al. (2006)
Randville Fm	Lake Superior area	22	0.6	Bekker et al. (2006)
Randville Fm	Lake Superior area	22	1.1	Bekker et al. (2006)
Randville Fm	Lake Superior area	22	1.2	Bekker et al. (2006)
Randville Fm	Lake Superior area	22	0.8	Bekker et al. (2006)
Randville Fm	Lake Superior area	22	0.9	Bekker et al. (2006)
Randville Fm	Lake Superior area	22	0.9	Bekker et al. (2006)
Randville Fm	Lake Superior area	22	1.4	Bekker et al. (2006)
Randville Fm	Lake Superior area	22	0.5	Bekker et al. (2006)
Randville Fm	Lake Superior area	22	1.9	Bekker et al. (2006)
Randville Fm	Lake Superior area	22	-0.4	Bekker et al. (2006)
Randville Fm	Lake Superior area	22	1.8	Bekker et al. (2006)
Randville Fm	Lake Superior area	22	1.3	Bekker et al. (2006)
Randville Fm	Lake Superior area	22	0.4	Bekker et al. (2006)
Randville Fm	Lake Superior area	22	1.5	Bekker et al. (2006)
Saunders Fm	Lake Superior area	22	1.6	Bekker et al. (2006)
Saunders Fm	Lake Superior area	22	1.3	Bekker et al. (2006)
Saunders Fm	Lake Superior area	22	1.4	Bekker et al. (2006)
Saunders Fm	Lake Superior area	22	-0.8	Bekker et al. (2006)
Saunders Fm	Lake Superior area	22	0.6	Bekker et al. (2006)
Saunders Fm	Lake Superior area	22	2.1	Bekker et al. (2006)
Saunders Fm	Lake Superior area	22	1.9	Bekker et al. (2006)
Saunders Fm	Lake Superior area	22	2.4	Bekker et al. (2006)
Saunders Fm	Lake Superior area	22	-1.2	Bekker et al. (2006)
Saunders Fm	Lake Superior area	22	0.4	Bekker et al. (2006)
Saunders Fm	Lake Superior area	22	1.5	Bekker et al. (2006)
Saunders Fm	Lake Superior area	22	-2.5	Bekker et al. (2006)
Saunders Fm	Lake Superior area	22	-1.4	Bekker et al. (2006)
Bad River Dolomite	Lake Superior area	22	1.8	Bekker et al. (2006)
Bad River Dolomite	Lake Superior area	22	-0.1	Bekker et al. (2006)
Bad River Dolomite	Lake Superior area	22	-0.2	Bekker et al. (2006)
Bad River Dolomite	Lake Superior area	22	2.4	Bekker et al. (2006)
Bad River Dolomite	Lake Superior area	22	1.2	Bekker et al. (2006)
Bad River Dolomite	Lake Superior area	22	2	Bekker et al. (2006)
Bad River Dolomite	Lake Superior area	22	1.9	Bekker et al. (2006)
Bad River Dolomite	Lake Superior area	22	1	Bekker et al. (2006)
Bad River Dolomite	Lake Superior area	22	2.1	Bekker et al. (2006)
Bad River Dolomite	Lake Superior area	22	2.3	Bekker et al. (2006)
Bad River Dolomite	Lake Superior area	22	1.5	Bekker et al. (2006)
Bad River Dolomite	Lake Superior area	22	0.7	Bekker et al. (2006)
Bad River Dolomite	Lake Superior area	22	1	Bekker et al. (2006)
Bad River Dolomite	Lake Superior area	22	1.3	Bekker et al. (2006)
Bad River Dolomite	Lake Superior area	22	0.5	Bekker et al. (2006)
Bad River Dolomite	Lake Superior area	22	-0.5	Bekker et al. (2006)
Bad River Dolomite	Lake Superior area	22	-0.3	Bekker et al. (2006)
Bad River Dolomite	Lake Superior area	22	0	Bekker et al. (2006)
Bad River Dolomite	Lake Superior area	22	-0.2	Bekker et al. (2006)
Trout Lake Fm	Lake Superior area	22	0.3	Bekker et al. (2006)
Trout Lake Fm	Lake Superior area	22	-0.2	Bekker et al. (2006)
Trout Lake Fm	Lake Superior area	22	0.3	Bekker et al. (2006)
Trout Lake Fm	Lake Superior area	22	0.3	Bekker et al. (2006)
Trout Lake Fm	Lake Superior area	22	0.4	Bekker et al. (2006)
Trout Lake Fm	Lake Superior area	22	0.2	Bekker et al. (2006)
Trout Lake Fm	Lake Superior area	22	0.4	Bekker et al. (2006)
Trout Lake Fm	Lake Superior area	22	0.1	Bekker et al. (2006)
Trout Lake Fm	Lake Superior area	22	-0.1	Bekker et al. (2006)
Trout Lake Fm	Lake Superior area	22	0.3	Bekker et al. (2006)
Denham Fm	Lake Superior area	22	1.8	Bekker et al. (2006)
Denham Fm	Lake Superior area	22	1.5	Bekker et al. (2006)
Denham Fm	Lake Superior area	22	0.6	Bekker et al. (2006)
Denham Fm	Lake Superior area	22	1	Bekker et al. (2006)
Denham Fm	Lake Superior area	22	1	Bekker et al. (2006)
Denham Fm	Lake Superior area	22	-2.6	Bekker et al. (2006)
Denham Fm	Lake Superior area	22	1.7	Bekker et al. (2006)
Denham Fm	Lake Superior area	22	1.7	Bekker et al. (2006)
Denham Fm	Lake Superior area	22	2.1	Bekker et al. (2006)
Denham Fm	Lake Superior area	22	1.3	Bekker et al. (2006)
Denham Fm	Lake Superior area	22	1.4	Bekker et al. (2006)
Denham Fm	Lake Superior area	22	2.1	Bekker et al. (2006)
Denham Fm	Lake Superior area	22	1.9	Bekker et al. (2006)
Denham Fm	Lake Superior area	22	2.5	Bekker et al. (2006)
Glen Township Fm	Lake Superior area	22	0.3	Bekker et al. (2006)
Glen Township Fm	Lake Superior area	22	-0.1	Bekker et al. (2006)
Glen Township Fm	Lake Superior area	22	0.2	Bekker et al. (2006)
Glen Township Fm	Lake Superior area	22	-1	Bekker et al. (2006)
Glen Township Fm	Lake Superior area	22	-0.4	Bekker et al. (2006)
Glen Township Fm	Lake Superior area	22	-1.2	Bekker et al. (2006)
Glen Township Fm	Lake Superior area	22	-0.1	Bekker et al. (2006)
Glen Township Fm	Lake Superior area	22	-0.2	Bekker et al. (2006)
Glen Township Fm	Lake Superior area	22	-0.4	Bekker et al. (2006)
Lofoten-Vesteralen	Norway	22	12.1	Baker & Fallick (1989b)
Lofoten-Vesteralen	Norway	22	10.6	Baker & Fallick (1989b)
Lofoten-Vesteralen	Norway	22	10.9	Baker & Fallick (1989b)
Lofoten-Vesteralen	Norway	22	10.2	Baker & Fallick (1989b)
Lofoten-Vesteralen	Norway	22	10.7	Baker & Fallick (1989b)
Lofoten-Vesteralen	Norway	22	-6.6	Baker & Fallick (1989b)
Lofoten-Vesteralen	Norway	22	-7	Baker & Fallick (1989b)
Lofoten-Vesteralen	Norway	22	3.3	Baker & Fallick (1989b)
Lofoten-Vesteralen	Norway	22	6.5	Baker & Fallick (1989b)
Lofoten-Vesteralen	Norway	22	-0.7	Baker & Fallick (1989b)
Lofoten-Vesteralen	Norway	22	1.7	Baker & Fallick (1989b)
Lofoten-Vesteralen	Norway	22	-6.5	Baker & Fallick (1989b)
Lofoten-Vesteralen	Norway	22	-6.3	Baker & Fallick (1989b)
Lofoten-Vesteralen	Norway	22	-4.5	Baker & Fallick (1989b)
Lofoten-Vesteralen	Norway	22	0.6	Baker & Fallick (1989b)
Lofoten-Vesteralen	Norway	22	-0.1	Baker & Fallick (1989b)
Lofoten-Vesteralen	Norway	22	-1.5	Baker & Fallick (1989b)
Lofoten-Vesteralen	Norway	22	-6.4	Baker & Fallick (1989b)
Lofoten-Vesteralen	Norway	22	2.8	Baker & Fallick (1989b)
Lofoten-Vesteralen	Norway	22	3.3	Baker & Fallick (1989b)
Lofoten-Vesteralen	Norway	22	4.2	Baker & Fallick (1989b)
Lofoten-Vesteralen	Norway	22	1.2	Baker & Fallick (1989b)
Lofoten-Vesteralen	Norway	22	8.3	Baker & Fallick (1989b)
Lofoten-Vesteralen	Norway	22	5.2	Baker & Fallick (1989b)
Lofoten-Vesteralen	Norway	22	-5.6	Baker & Fallick (1989b)
Lofoten-Vesteralen	Norway	22	-4.7	Baker & Fallick (1989b)
Lofoten-Vesteralen	Norway	22	-3.8	Baker & Fallick (1989b)
Lofoten-Vesteralen	Norway	22	-4.2	Baker & Fallick (1989b)
Lofoten-Vesteralen	Norway	22	7	Baker & Fallick (1989b)
Lofoten-Vesteralen	Norway	22	-6.7	Baker & Fallick (1989b)
Lofoten-Vesteralen	Norway	22	-4	Baker & Fallick (1989b)
Lofoten-Vesteralen	Norway	22	-3.2	Baker & Fallick (1989b)
Lofoten-Vesteralen	Norway	22	7.3	Baker & Fallick (1989b)
Lofoten-Vesteralen	Norway	22	3.1	Baker & Fallick (1989b)
Lofoten-Vesteralen	Norway	22	-1.6	Baker & Fallick (1989b)
Lofoten-Vesteralen	Norway	22	-3.3	Baker & Fallick (1989b)
Lofoten-Vesteralen	Norway	22	4	Baker & Fallick (1989b)
Lofoten-Vesteralen	Norway	22	-1.9	Baker & Fallick (1989b)
Lofoten-Vesteralen	Norway	22	4.2	Baker & Fallick (1989b)
Lofoten-Vesteralen	Norway	22	6.4	Baker & Fallick (1989b)
Lofoten-Vesteralen	Norway	22	6.5	Baker & Fallick (1989b)
Lofoten-Vesteralen	Norway	22	8.6	Baker & Fallick (1989b)
Lofoten-Vesteralen	Norway	22	6.3	Baker & Fallick (1989b)
Lofoten-Vesteralen	Norway	22	-1.1	Baker & Fallick (1989b)
Lofoten-Vesteralen	Norway	22	2.7	Baker & Fallick (1989b)
Lofoten-Vesteralen	Norway	22	8.3	Baker & Fallick (1989b)
Lofoten-Vesteralen	Norway	22	10.1	Baker & Fallick (1989b)
Lofoten-Vesteralen	Norway	22	9.5	Baker & Fallick (1989b)
Lofoten-Vesteralen	Norway	22	3.2	Baker & Fallick (1989b)
Lofoten-Vesteralen	Norway	22	10.6	Baker & Fallick (1989b)
Lofoten-Vesteralen	Norway	22	4.6	Baker & Fallick (1989b)
Lofoten-Vesteralen	Norway	22	6	Baker & Fallick (1989b)
Lofoten-Vesteralen	Norway	22	9	Baker & Fallick (1989b)
Lofoten-Vesteralen	Norway	22	7.6	Baker & Fallick (1989b)
Lofoten-Vesteralen	Norway	22	5.4	Baker & Fallick (1989b)
Lofoten-Vesteralen	Norway	22	8.2	Baker & Fallick (1989b)
Lofoten-Vesteralen	Norway	22	9.9	Baker & Fallick (1989b)
Lofoten-Vesteralen	Norway	22	8.3	Baker & Fallick (1989b)
Lofoten-Vesteralen	Norway	22	9.3	Baker & Fallick (1989b)
Lofoten-Vesteralen	Norway	22	10.4	Baker & Fallick (1989b)
Lofoten-Vesteralen	Norway	22	8.9	Baker & Fallick (1989b)
Lofoten-Vesteralen	Norway	22	9.3	Baker & Fallick (1989b)
Lofoten-Vesteralen	Norway	22	7.7	Baker & Fallick (1989b)
Lofoten-Vesteralen	Norway	22	7.1	Baker & Fallick (1989b)
Lofoten-Vesteralen	Norway	22	8.3	Baker & Fallick (1989b)
Lofoten-Vesteralen	Norway	22	8.6	Baker & Fallick (1989b)
Lofoten-Vesteralen	Norway	22	9.8	Baker & Fallick (1989b)
Lofoten-Vesteralen	Norway	22	7	Baker & Fallick (1989b)
Kivalo Fm	Perapohja Schist Belt	22	8.3	Karhu (1993)
Kivalo Fm	Perapohja Schist Belt	22	8.5	Karhu (1993)
Kivalo Fm	Perapohja Schist Belt	22	10.6	Karhu (1993)
Kivalo Fm	Perapohja Schist Belt	22	7.1	Karhu (1993)
Kivalo Fm	Perapohja Schist Belt	22	6.9	Karhu (1993)
Kivalo Fm	Perapohja Schist Belt	22	5.2	Karhu (1993)
Kivalo Fm	Perapohja Schist Belt	22	9.5	Karhu (1993)
Kivalo Fm	Perapohja Schist Belt	22	10	Karhu (1993)
Kvartsimaa Fm	Perapohja Schist Belt	22	8.31	Karhu (1993)
Kvartsimaa Fm	Perapohja Schist Belt	22	8.42	Karhu (1993)
Kvartsimaa Fm	Perapohja Schist Belt	22	9.21	Karhu (1993)
Lomagundi Group	Zimbabwe	22	8	Schidlowski et al. (1975)
Lomagundi Group	Zimbabwe	22	-4.9	Schidlowski et al. (1975)
Lomagundi Group	Zimbabwe	22	-4.9	Schidlowski et al. (1975)
Lomagundi Group	Zimbabwe	22	8.6	Schidlowski et al. (1975)
Lomagundi Group	Zimbabwe	22	8	Schidlowski et al. (1975)
Lomagundi Group	Zimbabwe	22	7.3	Schidlowski et al. (1975)
Lomagundi Group	Zimbabwe	22	7.8	Schidlowski et al. (1975)
Lomagundi Group	Zimbabwe	22	2.2	Schidlowski et al. (1975)
Lomagundi Group	Zimbabwe	22	8.1	Schidlowski et al. (1975)
Lomagundi Group	Zimbabwe	22	9.2	Schidlowski et al. (1975)
Lomagundi Group	Zimbabwe	22	12.5	Schidlowski et al. (1975)
Lomagundi Group	Zimbabwe	22	13.4	Schidlowski et al. (1975)
Lomagundi Group	Zimbabwe	22	11.4	Schidlowski et al. (1975)
Lomagundi Group	Zimbabwe	22	12.9	Schidlowski et al. (1975)
Nash Fork Fm	Wyoming-South Dakota, USA	22	26.6	Bekker et al. (2003)
Nash Fork Fm	Wyoming-South Dakota, USA	22	13.7	Bekker et al. (2003)
Nash Fork Fm	Wyoming-South Dakota, USA	22	13.3	Bekker et al. (2003)
Nash Fork Fm	Wyoming-South Dakota, USA	22	13.2	Bekker et al. (2003)
Nash Fork Fm	Wyoming-South Dakota, USA	22	24	Bekker et al. (2003)
Nash Fork Fm	Wyoming-South Dakota, USA	22	25.7	Bekker et al. (2003)
Nash Fork Fm	Wyoming-South Dakota, USA	22	26.5	Bekker et al. (2003)
Nash Fork Fm	Wyoming-South Dakota, USA	22	26	Bekker et al. (2003)
[truncated: 9,559 more rows]

## Sheet: Permian-Recent data
intertidal-sabkha settings	13Ccarb V-PDB		nearshore to open marine settings	13Ccarb V-PDB		Cramer et al. (2009) past 300 ka open marine
Botognaliet al. 2010	-2.2		Buggisch et al. 2012	-0.6		0.49
	-2			0.3		0.58
	-1.8			1.2		1.1
	-0.8			1.1		0.96
	-0.6			-0.3		0.96
	-1.5			1.9		0.9
	0.2			1.7		1.09
	0.2			2.3		1.05
	0.5			0.3		1.21
	0.7			0.7		1.14
	0.8			3.7		0.95
Paul and Lokier 2017	3.32		Clarkson 2017	4.7		0.88
	3.84			4.7		0.96
	3.58			4.5		0.87
	3.45			4.7		1.06
	3.72			4.7		1.04
	4.05			4.8		1.05
	4.26			4.2		0.83
	4.25			4.2		0.9
	4.33			4.3		1.22
	3.82			4		0.38
	4.26			3.2		0.75
	3.31			4.6		1.12
	3.93			3.5		0.95
	2.57			3.6		0.84
	3.98			3.3		0.9
Ferguson et al. 1999	3.56			3.6		0.92
	3.47			3.5		0.89
	4.5			3		1.03
	2.98			4.4		0.63
	2.22			4.1		0.87
	2.12			3.6		0.88
	2.33			4		0.6
	2.34			3.2		0.98
	3.09			2.9		0.2
	0.81			3.9		0.33
	1.06			4.2		0.74
	3.88			4.1		1
	1.29			4.1		0.14
	1.65			4.2		1.02
	3.04			3.9		1.16
	3.6			4		0.97
	3.34			3.9		1
	3.16			4		1.06
	3.85			4.2		0.55
	4.22			4.1		0.96
	4.23			4.3		0.85
	3.64			4.3		1.06
	1.29			4.2		0.88
	0.48			3.8		1.03
	-1.87			3.2		1.28
	-1.94			2.3		1.28
	2.1			2.1		0.98
	2.3			2.1		1.01
	1.99			3		1.12
	-4.38			3.5		1.14
	0.6			3.5		0.48
	3.17			3.4		1.11
	3.37			3.5		1.28
	0.03			3.3		0.96
	-1.56			3.3		1.26
	2.9			2.5		1.14
	1.77			2.5		1.09
	0.76			2.3		1.11
	1.64			1.9		0.85
Holail et al. 1999	3.7			1.4		1
	3.8			1.1		1.04
	3.2			1.1		0.54
	3.1			1.2		1.22
	3			1		0.54
	4			1.4		0.93
	3.3			0.5		0.29
	2.4			1.2		0.22
	3.5			0.5		0.42
	3.4			0.8		0.8
	4.7			0.8		0.83
	2.5			0.9		1.12
	4.4			0.7		1.23
	3.9			0.9		0.13
	4.5			0.8		1.09
	4.3			1		0.31
	3.7			1.2		0.88
	4.4			1.2		0.01
	3			1.8		1.04
	4.1			1.6		1.04
Mackenzie 1981	3.55			1.4		0.98
	3.45			1.5		1.08
	2.72			1.2		0.96
	3.09			1.1		0.44
	2.95			1.5		1.04
	3.39			1.5		0.27
	3.66			1.5		0.49
	2.88			1.4		1.21
	3.18			1.8		1.15
	1.97			1.6		0.89
	2.3			1.8		1.01
	2.46			2		1.22
	3.23			1.6		0.15
	3.05			1.9		1.02
	2.57			1.7		1.08
	2.21			1.5		1.04
	2.01			1.69963		1.19
	4.33			1.79081		1.23
	3.21			2.02084		1.19
	3.61			1.60876		0.95
	3.69			1.30169		1.32
	3			1.8876		0.26
	3.84			1.58749		0.27
	3.68			1.32288		1.22
	1.44			1.65889		1.02
	2.94			1.62729		1.25
	3.06			1.68383		1.01
	3.6			1.4013		0.3
	4.37			1.6749		1.19
	3.5			1.32721		1.04
	3.31			1.2577		1.18
	2.62			1.09027		1.17
	3.68			2.42502		1.06
	3.54			1.01464		1.05
	4.26			2.05036		0.76
	3.66			2.46789		0.94
	2.91			2.28901		0.9
	2.34			1.80464		0.18
	2.48			2.20226		0.36
	0.52			2.32741		0.79
Buggisch et al. 2012	4.3			1.82263		0.94
	4.4			1.96369		-0.1
	3.8			2.3536		-0.06
	4			2.069		1.19
	4.4			2.0838		0.88
	3.7			2.04438		1.04
	3.7			2.23182		1.07
	3			1.9406		0.89
	3.5			2.41983		1.04
	3.5			2.72884		0.53
	4.1			2.233		1.04
	4			2.22293		0.25
	4			2.25273		1.09
	4.1			2.57964		1.05
	5.3			3.40711		0.89
	4.4			3.04039		1.03
	4.7			2.80066		-0.04
	4.2			2.99854		0.74
	4.9			2.98938		0.91
	3.3			2.44692		1
	4.9			1.79672		0.99
	5.3			0.999224		1.06
	5.2			1.2316		0.69
	5.2			1.05401		0.88
	5.2			0.56521		1.02
	5.1			1.10134		1.11
	5.3			0.258675		0.73
	5.3			0.409522		0.37
	5			0.0907356		0.56
	4.8			0.171128		1.03
	4.8			-0.0698738		0.42
	4.2			0.329677		0.84
	4.9			-0.0225858		0.76
	4.1			0.107732		0.82
	3.6			0.853446		0.87
	-1.8			0.176529		1
	-3			0.0247003		0.86
	-3.5			0.421616		0.27
	-1.2			0.319329		0.31
	-2.9			0.930183		1.01
	-1			2.09343		1.01
	3.5			1.51807		0.11
	3.2			2.18532		-0.17
	1.9			1.66658		-0.07
	-3.5			1.50127		-0.36
	2.9			1.43652		0.09
	3.2			1.78359		0.32
	1.8			2.51204		-0.06
	0.5			1.75237		0.96
	0.3			1.2772		-0.13
	0.3			2.90186		0.15
	1.2			2.84225		0.61
	-1.3			2.50165		0.61
	1.6			2.70431		-0.04
	-1.3			1.43864		0.18
	1.6			1.52966		0.94
	1.9			0.706472		0.94
	1.7			0.546143		-0.14
	-0.9			0.40518		0.77
	-1.3			0.336972		0.77
	0.6			0.219562		0.97
	-1.1			0.137469		0.47
	-0.7			0.172477		-0.21
Margaritz et al. 1983	5.5			0.0319937		0.02
	5.3			0.0774262		0.77
	5.9			0.0336743		0.77
	4.6			-0.143358		0.52
	0.8			-0.341402		0.07
	1.7			-0.326118		0.14
	2.1			-0.72906		0.96
	3.1			-0.899178		0.45
Dal Corso et al. 2015	1.7			-0.856331		0.88
	2.7			-0.873588		0.88
	3.2			-0.484837		0.01
	2.1			0.497965		-0.37
	3.1			0.340758		0.59
	3.2			-1.05299		-0.13
	3.1			-2.24338		-0.59
	3			-1.88462		-0.57
	2.8			-1.61875		0.4
	3.6			-2.14144		0.4
	3.1			-1.39403		-0.41
	3.4			-0.266564		-0.21
	2.9			-0.168991		0.23
	3			-0.219447		-0.32
	2.8			0.644179		0.22
	2.9			0.980961		0.28
Peryt et al. 2012	5.08			0.925476		-0.49
	5.33			1.16581		-0.86
	3.51			0.499065		0.35
	1.67			1.47408		0.35
	4.02			0.893626		-0.43
	1.76			1.33691		0.36
	3.86			3.09863		0.36
	5.43			0.737299		-0.8
	3.2			1.4355		-0.6
	4.88			1.35768		0.01
	5.35			1.58954		0.8
	2.88			1.26616		0.8
	4.13			0.690766		-0.76
	2.95			0.9995		-0.66
	2.5			1.25007		-0.78
	0.68			1.77372		-0.43
Peryt et al. 2014	1.04			1.75156		0.11
	3.72			1.47566		-0.13
	-2.95			1.94396		0.85
	1.65			2.09324		0.85
	3.29			3.20377		-0.62
	1.4			3.01038		-1.05
	4.13			0.755462		0.16
	4.43			0.529387		-0.81
	5.27			0.718238		-0.75
	3.3			0.82038		0.82
	5.1			1.93041		0.82
Sangatullin et al. 2014	2.4			1.35329		-1.15
	0.3			1.23276		0.4
	0.5			1.31465		-1
	2.2			1.52869		-0.9
	3.1			1.8869		-1.06
	4.7			1.37678		0.89
	3.2			1.49655		0.89
	5.3			1.66088		0.26
	4.6			1.74469		-1.13
	4.7			0.370822		-0.83
	4.6			1.04269		-1.03
	4.8			0.710233		0.82
	4.9			1.02168		0.82
	5.1			1.3411		-1.23
	6.4			1.06527		-1
	5.8			1.77268		-1
	5.6			1.36538		-1.26
	6.6			1.21176		-1.3
	6.5			1.24527		0.74
	2.7			1.42427		0.74
	5.3			1.25986		-1.07
	4.7			1.39308		-0.41
	3.7			1.49114		-1.08
	5			1.55263		-0.92
	5.8			3.81008		-0.8
	5.8			3.09604		-1.2
Geske et al. 2012	2			2.40768		0.28
	2.1			2.40485		0.63
	1.9			2.47134		0.63
	1.7			1.33114		-1.01
	1.8			1.95439		-0.99
	2			2.23529		-0.89
	1.8			0.865117		-0.93
	2			0.481078		-0.18
	1.9			0.107531		-1.02
	3.2			0.232036		-0.8
	2.2			0.168598		-0.95
	1.2			0.409728		-1.18
	0.4			-0.189717		0.99
	1.9			-0.254731		0.99
	2.3			-0.475354		-0.94
	2.6			-0.71959		0.4
	3.3		Magaritz et al. 1983	-2.8		-0.29
	1.6			-0.7		-1.05
	2			-2		0.76
	2.1			-1.4		0.76
	1.6			-1		0.38
	2.8			-1		-0.76
	3.6			-0.7		-1.03
	2.3		Peryt et al. 2014	-1.78		-0.83
	2.7			-1.78		-0.57
	3.1		Hoddell et al. 1994	0		-0.98
	2.7			0.4		-0.75
	2.6			0.9		-1.1
	2.7			0.7		0.49
	1.4			0.6		-0.97
Adams et al. 2019	0.45			1		0.66
	0.59			0.9		0.66
	0.85			0.7		-0.32
	1.01			1.3		-0.69
	1.06			0.6		-0.75
	1.07			0.6		0.44
	-0.01			0.7		-0.84
	1.06			0.8		-1.07
	1.12			0.5		-0.16
	0.33			0.5		-0.88
	0.59			0.5		-0.94
	0.73			0.5		0.93
	0.82			0.9		0.93
	0.7			0.7		-0.85
	1.02			1.1		-0.85
	0.71			1.1		-0.44
	0.8			0.8		-1.13
	0.86			0.4		-1.08
	1.07			0.4		0.84
	1.33			0.5		0.84
	-0.3			0.5		-0.86
	0.52			0.6		0.61
	1.08			0.6		-1.08
	1.08			0.6		-1.03
	0.85			0.7		-1.12
	0.85			0.9		-1.05
	-0.04			0.9		0.53
	0.18			1.2		-0.97
	0.98			1.2		-0.97
	1.06			0.2		-0.91
	0.62			0.2		-0.38
	1.18			0.9		-0.86
	0.87			0.9		1.04
	0.86			0.9		1.04
	0.9			0.9		-0.76
	0.8			1		-1.12
	0.91			0.7		-0.81
	0.92			0.7		-0.72
	1.04			0.6		-0.71
	0.81			0.6		-0.68
	1.1			0.4		-0.37
	0.88			0.8		0.61
	0.85			0.8		1.08
	0.87			0.8		1.08
	0.48			0.8		-0.74
	0.18			0.8		0.05
	0.66			0.7		-0.89
	0.55			0.7		-0.33
	0.65			0.7		0.38
	1			0.9		-0.82
	1.09			1.1		-0.62
	1.03			0.5		-0.97
	0.87			0.7		-0.58
	0.8			0.7		-0.58
	0.24			0.8		0.84
	0.94			0.8		0.84
	0.27			0.9		-0.53
	1.08			0.9		-0.57
	0.63			0.9		-0.2
	0.5			0.9		-0.4
	0.71			1		0.56
	0.67			1		-0.53
	0.61			1		0.78
	1.1			1		0.78
	1			1		-0.47
	0.7			1.2		-0.28
	0.77			1.2		-0.67
	0.27			1.2		-0.12
	1			1		-0.56
	0.8			1		-0.66
	0.5			1.1		-0.16
	0.5			1.1		-0.79
	0.98			1.1		0.59
	1.03			1		0.59
	1.1			1		-0.75
	1			0.7		-0.51
	0.87			0.7		-0.45
	0.37			0.7		-0.38
	0.51			0.9		0.44
	0.57			0.9		-0.66
	0.68			0.9		-0.2
	0.82			0.9		-0.57
	0.83			0.9		0.83
	0.94			0.9		-0.88
	0.96			1		0.93
	1			1		0.93
	1			1		-0.6
	1			1		-0.81
	1			0.8		-0.18
	0.77			0.7		-0.68
	1			0.7		0.54
	1.1			0.7		0.66
	1.7			0.7		-0.77
	2			0.7		-0.34
	1.1			0.7		1.08
	1			0.7		1.08
Caruso et al. 2015	-5.34			0.7		-0.37
	-3.54			0.7		-0.12
	-3.08			0.8		-0.46
	-1.45			0.8		-0.19
	-2			0.9		0.8
	-0.44			1		0.8
	-0.96			1		-0.75
	-0.72			1		-1.16
	-2.46			1		-0.46
	-5.59			1.1		-0.55
	-2.78			1.1		-0.24
	-2.81			1.1		-0.42
	-3.89			1.3		-0.47
	-3.48			0.7		0.54
	-1.36			0.7		-0.49
	-4.94			0.8		-0.4
	-4.8			0.9		-0.51
	-3.36			1		-0.23
	-4.45			1.1		-0.67
	-4.83			1.1		-0.39
	-5.75			1.2		0.89
	-7.55			1.2		0.89
	-4.58			1.2		-0.72
	-3.52			0.3		-0.81
	-3.81			0.4		0.07
	-5.19			0.6		0.4
	-8.12			0.6		-0.8
	-5.21			0.6		-0.26
	-3.86			0.7		-0.59
	-3.87			0.7		0.88
	-3.5			0.7		-0.68
	-7.74			0.8		-0.45
	-6.05			0.8		-0.21
	-3.83			0.9		-0.57
	-3.17			1		-0.54
	-5.62			1		-0.42
	-5.98			1		0.94
	-17.25			1.1		0.94
	-13.45			1		-0.25
	-14.1			0.9		-0.54
	1.59			0.8		-0.3
	-4.96			0.8		-0.51
	-5.51			0.8		0.81
	-8.59			0.7		0.51
	-11.35			0.5		-0.65
	-6.19			0.5		-0.28
	-6.21			0.5		1.1
	-5.67			0.5		1.1
	-5.53			0.8		-0.71
	-4.96			1.2		-0.19
	-18.41			1.1		0.44
	-6.95			0.7		-0.25
	-4.72			0.9		-0.44
	-5.06			1		-0.66
	-3.27			1.2		0.46
	-3.07			0.7		-0.79
	-3			0.8		-0.7
	-4.57			1.1		1.11
	-4.73			1.1		1.11
	-12.31			1		-0.67
	-15.61			0.9		-0.38
	-5.7			0.6		-0.65
	-3.76			0.6		-0.42
	-5.84			0.6		0.27
	-10.69			0.7		-0.69
	-2.75			0.9		-0.25
	-10.38			0.9		-0.45
	-16.89			1		0.45
	-9.15			1		0.91
	-3.77			1		0.91
	-5.9			1.2		-0.4
	-1.92			0.4		-0.68
	-3.19			0.8		-0.44
	-2.85			0.7		1.1
	-2.99			0.7		1.1
	-2.67			1		-0.74
	-1.44			1		0.24
	-1.98			0.6		-0.65
	-1.9			0.7		0.33
	-2.35			0.7		-0.41
	-2.39			0.7		-0.62
	-1.6			0.7		-0.37
	-1.88			0.8		-0.21
	-2.66			0.8		-0.67
	-2.33			0.8		0.91
	-1.96			0.9		0.91
	-1.92			1		-0.53
	-1.94			1		0.27
	-2.61			1		-0.8
	-0.22			0.5		-0.8
	-0.82			0.6		-0.78
	-0.01			0.8		0.9
	-0.58			0.8		0.9
	-0.97			0.8		-0.96
	-0.63			0.3		0.29
	-0.82			0.4		-0.43
	-0.11			0.5		-0.23
	-0.73			0.6		0.51
	-0.45			0.7		0.51
	-0.77			0.5		-1.24
	-0.28			0.5		-1.13
	-0.23			0.5		-0.47
	-0.47			0.5		0.15
	-0.03			0.6		0.16
	-1.85			0.6		-1.08
	-0.07			0.7		0.87
	-7.29			0.7		0.87
	-7.71			0.7		-1.02
	-2			0.9		-1.15
	-3.51			0.9		-0.81
	-2.77			0.9		-0.78
	-0.34			0		-0.53
	0.63			0.1		0.03
	0.4			0.2		-0.97
	-2.55			0.3		-0.17
	-4.94			0.5		0.32
	-5.06			0.6		0.73
	-3.33			0.6		0.73
	-4.27			0.6		0.83
	-6.15			0.6		0.31
	-3.24			0.7		-1.07
	-2.08			0.7		-0.87
	-2.08			0.8		0.3
	-2.53			0.8		0.3
	-3.13			0.7		-0.47
	-4.83			0.7		-0.95
	-2.93			0.7		0.72
	-3.44			0.7		-0.89
	-4.05			0.7		0.83
	-10.75			0.9		0.83
	-7.89			0.9		-0.87
	-10.48			0.9		-0.3
	-7.96			1.1		-0.81
	-10.22			1.2		0.69
	-7.64			1.2		-1.05
	-5.52			0.8		-0.99
	-7.39			1.1		1.01
	-23.42			1.1		-0.81
	-24.1			1.1		-0.87
	0.69			1.1		0.34
	-7.5			1.2		-0.12
	-5.63			1.4		-1.09
	-3.89			1.4		-0.87
	-7.94			1.4		1.01
	-7.07			1.4		1.01
	-5.18			1.4		-0.89
	-3.56			1.5		-0.68
	-1.94			1.3		-0.45
	-6.07			1.6		0.74
	-4.77			1.6		-0.37
	-2.83			1.6		-0.56
	-7.96			1.6		-0.02
	-7.26			1.6		0.26
	-2.51			1.7		-0.54
	-0.91			1.7		-0.68
	-1.83			1.7		-0.21
	-1.75			0.8		-0.21
	-1.15			1.8		-0.65
	0.17			1		-0.23
	-1.08			1.1		-0.4
	-1.04			1.3		-0.22
	-5.71			0.9		0.88
	-4.72			0.9		0.88
	-5.19			1.1		0.88
	-2			1.4		0.33
	-0.21			1.5		-0.04
	-0.95			1.5		1.09
	-3.23			1.2		1.09
	-1.4			1.3		1.09
	-4.72			1.4		-0.14
	-1.26			1.2		0.99
	1			1.2		0.99
	1.07			1.2		0.99
	0.39			1.4		-0.15
	-0.7			1.4		1.26
	1.12			1.4		-0.45
	1.24			1.6		-0.17
	1.09			0.8		-0.51
	0.86			0.8		0.01
	0.55			1		0.64
	0.42			1.2		-0.12
	-1.39			1.3		0.42
	-1.23			1.8		1.16
	-1.63		Glacon et al. 1990	1.56		1.16
	-2.03			0.95		1.16
	-2.77			0.4		-0.32
	-4.42			0.77		0.57
	-5.78			0.57		-0.23
	-5.8			0.99		-0.41
	-5.57			0.88		-0.38
	-8.25			1.56		0.04
	-0.78			0.95		1.26
	0.48			0.91		1.26
	-0.15			1.2		1.26
	-2.27			1.18		-0.31
	-2.85			1.25		0.17
	-1.02			0.6		-0.23
	-1.73			1.56		-0.38
	-0.38			1.05		-0.27
	-0.42			1.17		-0.08
	-0.15			1.87		0.92
	-0.22			0.81		0.06
	0.31			0.93		1.11
	-0.14			1.51		1.11
	-0.87			1.25		1.11
	-2.17			0.48		0.03
	-3.5			0.82		-0.2
	-1.25			0.68		0.08
	-2.66			2.25		0.46
	-2.69			1.81		-0.23
	-1.31			1.11		-0.26
	-3.89			2		-0.35
	2.42			1.94		-0.4
	-5.18			2.65		0.27
	2.04		Matteo et al. 2017	-2.98		0.65
	2.56			-4.19		-0.52
	2.21			-3.26		-0.32
	-6.32			-3.41		-0.7
	1.89			-2.93		-0.12
	0.21			-2.04		1.17
	-4.68			-4.57		1.17
	-3.46			-2.57		1.17
	-5.37			-2.18		-0.42
	-2.43			-2.23		-0.15
	-0.25			-1.14		-0.01
	0.09			-2.63		0.51
	-2.86			-1.34		-0.63
	-3.38			-3.22		-0.59
	-0.9			-1.85		0.47
	-1.45			-2.43		-0.82
	-0.36			-1.19		-0.81
	1.38			-2.38		-0.25
	0.86			-1.78		0.37
	3.8			-0.96		-0.86
	-1.65			-1.96		1.29
	2.71			-1.58		1.09
	0.38			-1.91		0.94
	-1.12			-1.16		-0.62
	-3.23		van der Laan et al. 2012	1		0.93
	-2.2			1		0.93
	-4.1			1		0.93
	3.01			1		-0.44
	-0.32			1		0.42
	0.13			1		-0.09
	-2.76			1		-0.41
	-1.1			1		0.77
	0.11			1		0.06
	0.34			1		0.49
	-0.11			1		-0.29
	-0.43			1		-0.28
	-0.88			1		0.59
	-3.8			1		-0.16
	2.65			1		-0.45
	3.98			1		0.66
	3.51			1		-0.54
	2.87			1		1.18
	2.78			1		1.18
	3.95			1		1.18
	4.03			1		-0.7
	3.14			1		-0.63
	-2.26			1		-0.13
	-2.15			1		0.14
	-6.71			1		-0.58
	4.19			1		-0.42
	4.75			1		0.03
	-0.96			1		0.44
Pierre et al. 1990	-2.44			1		1.15
	-3.62			1		-0.68
	-1.87			1		1.15
	-1.91			1		1.15
	-1.05			1		0.35
	-1.68			1		-0.59
	-1.98			1		1.29
	-1.84			1		-0.57
	-2.21			1		-0.18
	-0.89			1		1.29
	0.05			1		1.29
	0.96			1		1.24
	1.85			1		-0.68
	-2.41			1		0.6
	0.12			1		0.91
	-0.45			1		1.24
	-3.11			1		1.24
	-0.11			1		-0.38
	-1.06			1		-0.34
	-0.8			1		0.21
	-0.99			1		-0.33
	1.29			1		1.21
	0.15			1		-0.51
	-0.66			1		0.04
	-1.17			1		0.58
	-0.07			1		1.21
	-0.13			1		1.21
	0.23			1		0.55
	-0.92			1		0.55
	0.87			1		-0.01
	-0.07			1		1.05
	0.29			1		1.11
	-0.05			1		-0.08
	-2.78			1		-0.19
	-1.71			1		-0.1
	-2.25			1		0.95
	0.22			1		-0.04
	0.34			1		1.14
	0.42			1		0.2
	0.6			1		0.49
	0.57			1		-0.2
	-1.65			1		-0.32
	-0.9			1		1.2
	-0.65			1		1.2
	-2.9			1		-0.42
	-2.11			1		-0.02
	1			1		0.51
	0.12			1		-0.25
	0.78			1		-0.21
	-0.9			1		-0.13
	-1.09			1		-0.73
	-0.85			1		1.14
	-0.87			1		1.14
	-1.03			1		-0.38
	-0.66			1		-0.19
	-1.08			1		0.91
	1.03			1		0.27
	1.48			1		0.98
	-1.08			1		-0.1
	-0.75			1		-0.54
	-1.26			1		0.37
	-0.61			1		0.98
	-1.28			1		-0.34
	-0.91			1		0.98
	-0.73			1		-0.55
	-0.99			1		0.68
	-1.19			1		-0.27
	-1.81			1		-0.06
	-2.45			1		-0.79
	-1.69			1		0.88
	-1.8			1		0.88
	-1.19			1		-0.55
	1.48			1		-0.64
	1.23					0.88
	1.22					-0.37
	0.51					0.67
	0.03					-0.51
	0.54					-0.47
	0.84					-0.29
	0.51					-0.69
	0.16					-0.9
	0.5					1.24
	-0.33					1.16
	1.85					0.92
	-1.54					-0.17
	-1.72					0.15
	-0.92					-0.47
	-1.19					-0.53
	-1.09					0.92
	-1.29					-0.37
	-1.11					0.92
	-1.4					-0.56
	-1.27					-0.47
	-1.44					0.49
	-1.96					-0.73
	-1.49					0.95
	-2					-0.16
	-5.1					-0.68
	0.66					1.01
	-6.68					-0.62
	-0.62					-0.42
	0.36					-0.25
	0.8					-0.38
	-0.11					-0.25
	0.64					0.95
	0.71					0.95
	0.92					-0.45
	0.6					0.9
	-0.82					1.01
	1.69					1.01
	-0.81					-0.57
	-0.99					-0.07
	0.39					0.76
	-0.9					-0.46
	-1.06					-0.52
	-0.97					0.9
	-1.31					0.9
	-1.57					0.34
	-2.66					-0.48
	-2.64					0.76
	-2.16					0.76
	-1.42					1.02
	-1.15					-0.41
	-0.91					-0.52
	-1.23					0.92
	-1.2					0.92
	-1.2					0.56
	-0.82					-0.46
	-0.77					1.02
	-0.94					1.02
	-0.97					-0.51
	-0.85					0.91
	-2.43					0.91
	-0.96					-0.36
	-1.32					0.99
	-0.79					0.99
	0.58					1.03
	-2.37					0
	-1.21					0.36
	-2					-0.34
	-1.79					0.67
	-0.19					0.72
	-0.91					-0.48
	-0.58					1.03
	-1.39					1.03
	-0.45					1.03
Evans et al. 2015	-3.8					1.03
	-4					1.1
	-3.9					1.1
	-4.3					0.74
	-4.2					0.92
	-4.3					0.92
	-4.6					0.74
	4.6					0.74
	-4.7					-0.18
	-4.4					0.18
	-4					-0.42
	-3.8					-0.04
	-4.3					0.89
	-4.3					0.89
	-4.8					0.86
	-4.8					0.86
	-4.9					0.86
	-4.9					0.66
	-4.9					0.66
	-4.8					1.21
	0.5					1.1
	0.2					0.59
	0.6					0.2
	0.9					0.2
	0.9					0.2
	1.5					0.24
	1.3					1.04
	1.1					1.04
	1.1					0.86
	0.5					0.86
	0.4					-0.04
	-0.1					-0.14
	-0.1					0.64
	-0.1					-0.17
	-0.1					0.64
	0.3					-0.18
Bellanca et al. 1990	-0.7					0.64
	-0.69					0.64
	-4.85					-0.02
	-2.45					0.73
	-5.19					0.73
	0.27					0.73
	-3.39					0.07
	-0.97					0.69
	-0.21					0.69
	-0.17					0
	-4.19					0.72
	-3.12					0.72
	-2.77					-0.26
	-0.43					0.94
	0.07					0.45
	-3.18					0.45
	-1.21					0.08
	-2.42					0.59
	-3.72					0.59
	-4.33					0.59
	-8.8					-0.14
	-9.14					-0.3
	-3.09					-0.12
	-6.68					0.94
	-6.96					0.94
	-6.45					0.94
	-1.17					0.82
	-7.38					0.82
	-5.5					0.82
	-4.79					0.01
	-0.9					0.44
Montana et al. 1993	-1.57					0.58
	-1.9					0.58
	-2.02					0.58
	4.01					-0.09
	-2					-0.81
	-1.9					0.23
	-2					0.63
	-2.4					0.91
	-1.8					0.91
	-3.1					0.91
	-3.7					0.09
	-2.7					-0.23
	-4.5					0.88
	-2.4					0.88
	-2.4					0.88
	-1.7					0.59
	-3					-0.66
	-3.2					0.59
	-6.3					0.59
	-3.2					0.47
	-3.7					-0.32
	-3.1					0.7
	-3.3					-0.4
	-3.4					-0.05
	-5.5					0.7
	-4					0.7
	-3.7					-0.34
	-3.4					0.18
	-2.3					-0.35
	3.8					0.18
	0.45					0.18
	-1.1					-0.25
	-2.4					0.32
	-0.84					-0.06
	-0.8					0.68
	-0.7					-0.3
	2.5					0.03
	3.4					0.11
	4.6					-0.14
						-0.04
						-0.29
						0.32
						0.32
						-0.28
						-0.09
						-0.03
						-0.09
						0.34
						0.86
						-0.1
						0.91
						1.13
						0.34
						0.34
						0.06
						-0.14
						0.28
						-0.02
						-0.3
						-0.07
						-0.12
						0.56
						0.56
						0.56
						0.09
						-0.23
						0.44
						0.44
						-0.62
						0.79
						0.79
						0.79
						-0.05
						-0.25
						0.26
						0.93
						0.93
						0
						-0.88
						0.57
						0.57
						-0.33
						-0.31
						0.39
						0.39
						0.39
						0.64
						0.64
						-0.94
						0.32
						0.33
						0.32
						-0.79
						-0.08
						-0.08
						-0.34
						0.01
						-0.54
						0.52
						0.52
						0.52
						-0.71
						0.6
						0.6
						0.6
						-0.75
						-0.4
						0.27
						0.27
						0.17
						0.05
						-0.92
						0.8
						0.8
						0.8
						-1.14
						0.36
						0.36
						-0.87
						0.19
						0.19
						0.27
						-0.88
						0.14
						0.14
						0.14
						0.27
						-1
						0.18
						0.5
						0.5
						-0.88
						-0.89
						0.52
						0.52
						-0.84
						-0.7
						-1.03
						-0.77
						0.64
						0.64
						0.23
						-0.89
						0.64
						0.39
						-0.79
						-0.41
						-1.08
						-0.78
						1.14
						1.25
						1.27
						0.99
						0.93
						0.44
						0.44
						-0.94
						0.44
						0.84
						0.84
						-0.92
						-1.04
						0.84
						-0.49
						-1.01
						0.72
						0.72
						-1.18
						-0.33
						0.63
						-0.98
						0.72
						0.82
						0.82
						0.47
						0.47
						0.09
						-0.98
						-0.66
						-0.18
						0.82
						0.47
						-0.87
						-1.17
						0.58
						0.58
						-0.53
						-1.22
						-1.26
						0.58
						-1.18
						0.43
						0.43
						-0.08
						-1.21
						-1.17
						0.43
						-0.45
						0.04
						-0.58
						0.7
						0.7
						-0.98
						-1.08
						0.03
						-0.96
						-0.03
						-1.03
						-0.11
						-0.11
						-0.99
						-1.06
						-1
						-0.53
						0.1
						0.1
						-1.15
						-1.27
						0.37
						-1.19
						-1.01
						0.24
						0.24
						-1.02
						-0.1
						-1.07
						-0.49
						0.6
						0.6
						-1.06
						1.11
						1.38
						1.3
						1.37
						-1.14
						0.53
						0.53
						-0.95
						0.26
						0.26
						-1.05
						0.86
						0.86
						-1.22
						-0.47
						0.3
						-1.04
						-0.56
						-1.14
						-0.07
						-0.8
						0.79
						0.79
						-0.76
						-1.01
						-1.31
						0.19
						-1.07
						-0.64
						-1.18
						0.25
						-0.06
						-1.26
						-1.28
						-0.99
						0.78
						0.78
						-1.19
						-0.61
						-1.27
						-0.06
						-0.41
						-1.17
						-1
						-0.99
						-0.46
						0.78
						0.78
						-1.23
						-1.07
						0.06
						-1.02
						0.71
						0.71
						0.19
						-1.17
						-0.49
						-1.07
						0.89
						0.89
						-1.04
						-0.85
						1.28
						1.25
						1.31
						-1.12
						-0.98
						-0.48
						-0.76
						-0.51
						-0.85
						-0.67
						0.25
						-0.79
						0.72
						0.72
						-0.7
						-0.36
						-0.91
						-1.01
						-1.06
						0.18
						-0.95
						-0.79
						-0.5
						-1.35
						-1.1
						0.35
						-0.44
						0.28
						0.66
						0.66
						-1.18
						-0.37
						-0.99
						-1.13
						-1.2
						-0.79
						-1.04
						-1.12
						-0.66
						-1.05
						0.04
						0.31
						0.2
						-1.29
						0.28
						0.28
						-1.02
						-1.05
						-1.06
						-1.06
						-0.97
						-0.6
						-0.89
						1.36
						1.23
						-0.39
						0.31
						-0.76
						-0.64
						-0.75
						-0.72
						-0.75
						0.61
						0.61
						0.05
						-0.9
						-0.47
						-0.94
						-0.77
						-1.14
						-0.99
						-1.03
						-0.1
						-0.79
						-1.06
						-0.59
						-0.82
						0.37
						0.37
						-0.8
						-0.54
						-0.8
						-0.89
						-1.18
						0.42
						-1.2
						-0.89
						-1.1
						-1.12
						-0.92
						0.63
						0.63
						-0.79
						-0.77
						0.01
						-0.35
						-0.96
						-0.32
						1.11
						0.89
						0.41
						0.41
						0.6
						0.6
						-1.09
						-0.24
						0.46
						0.46
						-0.85
						-1.17
						-1.08
						-0.94
						-0.05
						-0.68
						0.58
						0.58
						-1.32
						-0.01
						-0.88
						0.69
						-1.21
						-0.33
						-1.19
						0.52
						0.52
						-0.38
						-1.19
						0.42
						0.28
						0.28
						-0.64
						0.11
						-0.65
						0.38
						0.38
						-0.38
						-0.61
						0.26
						0.26
						-0.15
						0.38
						0.71
						-0.51
						0.49
						0.49
						0.61
						0.78
						0.78
						1.09
						1.09
						0.1
						0.66
						0.71
						0.71
						-0.11
						-0.01
						0.88
						0.88
						0.78
						0.78
						0.48
						0.02
						-0.23
						0.75
						0.82
						0.82
						0.66
						0.03
						0.81
						0.3
						-0.11
						0.21
						1
						1
						0.14
						-0.06
						0.77
						0.76
						0.76
						0.11
						1.05
						1.05
						0.75
						0.75
						-0.1
						0.97
						0.97
						0.75
						0.96
						0.78
						0.57
						0.57
						0.75
						0.75
						0.61
						0.26
						0.83
						-0.21
						-0.5
						0.34
						0.34
						-0.6
						0.37
						-0.51
						-0.51
						-0.71
						0.24
						-0.68
						-0.42
						-0.86
						0.19
						-0.32
						-1.09
						0
						0
						0.42
						-0.35
						0.34
						0.82
						-0.35
						0.13
						-0.8
						0.53
						0.53
						-0.53
						-0.88
						0.47
						-0.87
						0.16
						0.16
						-0.65
						0.79
						0.75
						-0.14
						0.79
						0.24
						0.24
						-0.77
						-0.42
						0.32
						-0.68
						-0.64
						-0.52
						0.16
						0.39
						0.39
						0.45
						0.45
						-0.2
						-0.05
						-0.62
						-0.7
						0.96
						0.96
						0.34
						0.92
						0.92
						0.9
						0.9
						0.53
						-0.44
						-0.32
						0.81
						0.81
						0.6
						-0.72
						1.06
						1.23
						0.81
						0.81
						-0.6
						-0.57
						0
						0.18
						-0.61
						0.29
						0.44
						0.44
						-0.28
						-0.54
						0.7
						0.7
						-0.31
						0.85
						0.85
						-0.44
						0.91
						0.91
						0.33
						-0.18
						0.95
						-0.22
						0.89
						0.89
						0.34
						-0.27
						0.82
						-0.33
						-0.12
						0.89
						0.56
						0.72
						0.72
						-0.86
						-0.3
						-0.71
						0.9
						0.43
						0.45
						-0.3
						0.1
						0.1
						-0.11
						0.64
						-0.42
						0.48
						0.48
						-0.41
						-0.03
						0.51
						-0.43
						0.01
						-0.57
						0.58
						0.58
						-0.61
						0.45
						-0.36
						0.38
						0.62
						-0.65
						1.29
						1.19
						1.1
						-0.43
						-0.85
						-0.6
						-0.47
						-0.59
						-0.7
						0.33
						0.24
						0.24
						-0.32
						-0.71
						-0.56
						0.1
						0.1
						-0.81
						-0.9
						0.63
						0.43
						0.43
						-0.61
						-0.76
						-0.51
						-0.87
						-0.98
						0.97
						0.97
						-0.86
						0.51
						0.53
						0.53
						-0.84
						-0.57
						-0.85
						0.09
						0.81
						-0.31
						0.57
						0.59
						0.59
						-0.9
						-1.15
						0.59
						0.59
						-1
						-0.67
						0.41
						-1.06
						0.4
						0.28
						0.64
						0.18
						0.18
						-0.58
						-1.12
						0.41
						0.65
						-0.88
						-0.78
						0.45
						0.45
						-0.32
						-0.64
						-0.75
						1.08
						0.99
						0.78
						0.78
						0.74
						-0.98
						0.2
						0.2
						0.18
						-0.76
						-0.93
						0.81
						0.81
						-1.1
						0.71
						0.19
						0.08
						-0.42
						0.96
						0.74
						0.57
						-0.84
						-0.02
						0.49
						-0.82
						0.41
						0.24
						-0.96
						-1.08
						-0.64
						-0.81
						-0.3
						-0.45
						0.49
						-0.69
						-1.03
						0.61
						-0.59
						-0.85
						0.54
						-0.48
						-0.66
						1.09
						0.36
						-0.55
						-0.59
						0.17
						-0.95
						-1.15
						-0.76
						0.36
						0.36
						-0.52
						-0.92
						0.97
						-0.78
						-0.91
						0.39
						-1.13
						0.62
						-0.66
						-0.52
						-0.15
						0.24
						0.24
						-1
						0.38
						0.38
						-0.06
						-0.93
						0.34
						0.34
						-0.81
						-0.68
						-0.79
						0
						-0.75
						0.82
						-0.54
						-0.69
						-1.21
						0.49
						0.49
						0.38
						-1.27
						-0.97
						-1.2
						0.04
						-1.26
						-1.43
						-0.5
						-1.3
						-1.68
						-1.68
						-0.19
						0.31
						0.45
						0.45
						-0.65
						-0.29
						0.6
						-1.26
						0.69
						-1.14
						-1.01
						0.44
						-1.54
						-1.37
						0.45
						-1.63
						-1.71
						0.48
						0.48
						-1.3
						-0.23
						-1.09
						-0.48
						-1.38
						0.28
						-0.27
						-1.02
						0.19
						0.19
						-0.06
						-0.76
						-0.95
						-0.1
						0.09
						0.24
						0.24
						0.28
						0.28
						-0.01
						-0.01
						0.22
						0.01
						-0.44
						-1.2
						-0.35
						-0.35
						-0.87
						-1.39
						0.36
						0.36
						0.91
						-0.7
						-0.74
						0.25
						-1.02
						0.6
						0.6
						-0.52
						0.11
						-0.28
						-0.52
						0.03
						0.42
						0.42
						0.21
						-0.1
						0.91
						0.91
						0.12
						-1.45
						-0.56
						0.46
						-0.91
						1.02
						1.02
						-0.25
						-0.04
						-0.55
						-0.16
						-0.48
						-0.5
						0.97
						0.97
						0.79
						0.79
						0.46
						-0.34
						0.61
						0.61
						-0.57
						-0.2
						-0.39
						-0.73
						-0.12
