# Supplementary material for: The Lomagundi-Jatuli Event and Earth’s oxygenation
Source: Research Square preprint supplement (doi:10.21203/rs.3.rs-90288/v1), 2020-11-18
Supplement: Supplementary file 3 [file 63e985f0ba9d782e950caa47.docx]

**Supplementary Information: The Lomagundi-Jatuli Event and Earth’s oxygenation**

A. R. Prave1*, K. Kirsimäe2, A. Lepland2,3, A. E. Fallick4, T. Kreitsmann2, Yu. E. Deines5, A. E. Romashkin5, D. V. Rychanchik5, P. V. Medvedev5, M. Moussavou6, K.Bakakas6

1School of Earth and Environmental Sciences, University of St Andrews, KY16 9AL, Scotland

2Department of Geology, University of Tartu, 50411 Tartu, Estonia

3Geological Survey of Norway, 7491 Trondheim, Norway

4SUERC, Rankine Avenue, East Kilbride G75 0QF, Scotland

5Institute of Geology, Karelian Research Centre, Russian Academy of Sciences, Pushkinskaya 11, 185610 Petrozavodsk, Russia

6Depart. of Geology, Université des Sciences et Techniques de Masuku, 943 Franceville, Gabon

*Corresponding author: Tony Prave <ap13@st-andrews.ac.uk>

Methods

A total of 11,557 carbonate-carbon isotope data (d13Ccarb) were compiled for our study for the time interval 3.0–1.0 Ga (see Worksheets 1 and 2 in Data S1). A total of 3,386 carbonate-carbon isotope data were also compiled for Phanerozoic evaporite and related carbonate rocks and the modern open ocean (see Worksheet 3 in Data S1). Sources for isotope data and facies information are given in Tables S1 and S2 and keyed to the accompanying reference list. A total of 188 new d13Ccarb and oxygen isotope data were determined for carbonate rock samples for outcrops of the Tulomozero Formation at Raiguba (62°22.107’N, 033° 47.129’E) and Shunga (62°36.697’N, 034° 49.457’E) and from the Onega Parametric Hole (OPH) drill core spanning the transition from the Tulomozero Formation into the overlying Zaonega Formation; these data are reported in Table S5. Measurements were made on a Thermo Scientific Delta V Advantage continuous flow isotope ratio mass-spectrometer in the Department of Geology, University of Tartu, Estonia, following standard protocols. C and O data are reported in *per mil* (‰) deviation relative to the Vienna PeeDee Belemnite (V-PDB) and standard reproducibility was better than ±0.2‰.

Sample means were determined by the bootstrap method which enables estimation of the sampling bias on statistics (mean, median, etc.) by a resampling technique where a synthetic data set (bootstrap sample) is created by random independent sampling with replacement from an existing sample (population). The statistics of interest are estimated for each bootstrap sample whereby each step is repeated numerous times obtaining respective estimates that can be treated for additional statistical inferences (mean, standard deviation, confidence interval of the estimates, etc.). The bootstrapped means and confidence intervals reported in Table 1 (main paper) and Tables S3-S4 were calculated from 10,000 repetitions. The sample bias of the binned data was assessed further by jackknife estimates that were in all cases in agreement with bootstrapped means (jackknife bias = 0). Jackknife procedure is similar to the bootstrap method, but sampling is done without replacement and was developed for estimating the variance and bias of large data sets. During the jackknife procedure statistic estimate is calculated leaving out one observation at a time from the sample set. Similar to the bootstrap method, the statistic of an estimate for the bias can be calculated from the population of the repeated calculations.

C-O Isotope data

Our new (Table S5) and compiled published d13Ccarb data (Data S1) span the worldwide distribution of Palaeoproterozoic outcrop belts that contain the Lomagundi-Jatuli Event (LJE; Figure S1). Details of facies characterisation and interpretation were obtained from the publications given in the reference list. To evaluate the co-variation between C-isotope values and facies, the available published data for LJE-bearing successions worldwide were assigned to depositional settings where sufficient sedimentological details were available: (a) intertidal–sabkha; (b) nearshore marine–inner shelf and (c) open and deeper marine. The d13Ccarb data between 3.0 and 1.0 Ga (Data S1) were grouped in 100-Myr age bins (i.e. Geons).


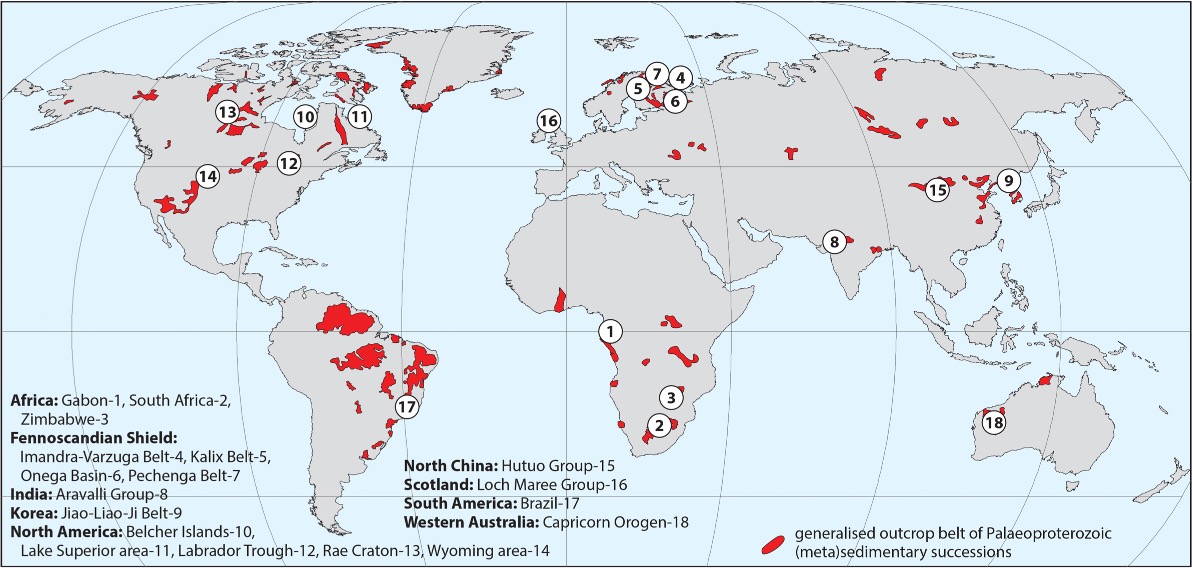


Figure S1. Generalised map of Palaeoproterozoic outcrop belts. Locations of Palaeoproterozoic successions utilised in this compilation shown by circled number. Tables S1and S2 list the sources for d13Ccarb data keyed to each locality. Data are reported in Worksheets 1 and 2 in Data S1.

| Table S1. Sources of C isotope data for Palaeoproterozoic successions. | |
| --- | --- |
| Locality keyed to Figure S1 | Source (number keyed to references) |
| 1. Africa: Gabon | 2, 13, 58, 64 |
| 1. Africa: South Africa | 6, 12, 19, 22, 71 |
| 1. Africa: Zimbabwe | 41 |
| 1. Fennoscandian Shield: Imandra-Varzuga Belt | 32, 45, 52, 54 |
| 1. Fennoscandian Shield: Kalix Belt | 46, 79 |
| 1. Fennoscandian Shield: Onega Basin | 10, 32, 45, 47, 49, 51, 53, 54, 55 |
| 1. Fennoscandian Shield: Pechenga Belt | 32, 45, 50, 51, 54, 68, 69, 70 |
| 1. India: Aravalli Group | 39, 59, 66 |
| 1. Korea: Jiao-Liao-Ji Belt | 76 |
| 1. North America: Belcher Islands | 27, 31 |
| 1. North America: Lake Superior area | 5 |
| 1. North America: Labrador Trough | 48, 81 |
| 1. North America: Rae Craton | 42 |
| 1. North America: Wyoming area | 3, 4, 29, 30 |
| 1. North China: Hutuo Group | 72 |
| 1. Scotland: Loch Maree Group | 33 |
| 1. South America: Brazil | 39 |
| 1. Western Australia: Capricorn Orogen | 7, 18, 25, 35, 37, 40, 80 |

Table S1. Source of facies information used for Palaeoproterozoic successions. Information is keyed to each locality shown on Figure S1; source numbers are keyed to the numbered reference list. d13Ccarb data can be found in Worksheets 1 and 2 in Data S1.

| Table S2. Sources of C-isotope data for Permian to Recent deposits. | |
| --- | --- |
| age of deposit | Source (numbers keyed to reference list) |
| Recent to modern | 9, 16, 21, 29, 34, 44, 60, 74 |
| Messinian | 8, 14, 20, 24, 26, 43, 56, 57, 63, 78 |
| Permian-Triassic | 1, 11, 15, 17, 23, 38, 61, 62, 65, 67, 73, 75, 77 |

Table S2. Sources of information used for Permian to Recent deposits; source numbers are keyed to the numbered reference list. d13Ccarb data can be found in Worksheet 3 in Data S1.

| Table S3. Summary means of d13Ccarb (‰ V-PDB) data (C.I.–confidence interval) | | | | | | |
| --- | --- | --- | --- | --- | --- | --- |
| data set | palaeoenvironmental setting | N | bootstrapped mean | bootstrapped mean 95% C.I. lower | bootstrapped mean 95% C.I. upper | jackknifed mean |
| Geons 26-24 | nearshore-inner shelf | 447 | 0.1 | -0.1 | 0.2 | 0.1 |
| open-deeper marine | 362 | -0.6 | -0.8 | -0.4 | -0.6 |
| Geon 23_LJE | nearshore-inner shelf | 41 | 5.4 | 4.6 | 6.3 | 5.4 |
| open-deeper marine | 12 | -2.0 | -2.6 | -1.5 | -2.0 |
| Geon 22_LJE | intertidal-sabkha | 85 | 9.8 | 8.6 | 11.1 | 9.8 |
| nearshore-inner shelf | 171 | 6.0 | 5.8 | 6.2 | 6.0 |
| open-deeper marine | 105 | 1.2 | 1.0 | 1.3 | 1.2 |
| Geon 21 LJE | intertidal-sabkha | 420 | 9.3 | 9.1 | 9.5 | 9.3 |
| nearshore-inner shelf | 275 | 5.7 | 5.5 | 6.0 | 5.7 |
| open-deeper marine | 518 | 2.0 | 1.9 | 2.2 | 2.0 |
| Geon 20 LJE | nearshore-inner shelf | 218 | 7.1 | 7.0 | 7.3 | 7.1 |
| open-deeper marine | 97 | 2.3 | 1.9 | 2.7 | 2.3 |
| Geons 20-19 | intertidal-sabkha | 140 | 0.6 | 0.4 | 0.9 | 0.6 |
| nearshore-inner shelf | 930 | 0.6 | 0.5 | 0.7 | 0.6 |
| open-deeper marine | 608 | -0.3 | -0.5 | -0.1 | -0.3 |
| Perm.-Trias. | intertidal-sabkha | 266 | 2.2 | 1.9 | 2.4 | 2.2 |
| open-deeper marine | 290 | 1.6 | 1.4 | 1.7 | 1.6 |
| Messinian | intertidal-sabkha | 518 | -2.3 | -2.6 | -2.0 | -2.3 |
| open-deeper marine | 440 | 0.8 | 0.7 | 0.8 | 0.8 |
| Recent | intertidal-sabkha | 125 | 2.6 | 2.3 | 2.9 | 2.6 |
| open-deeper marine | 1747 | 0.1 | 0.0 | 0.1 | 0.1 |

Table S3. Summary means keyed to palaeoenvironmental setting for each analysed time interval. d13Ccarb data can be found in Table S5 and Data S1. LJE-baring intervals highlighted in light red. Geons are 100 Myr.

| Table S4. Summary means of d13Ccarb (‰ V-PDB) data for Geons 29-10 (C.I.–confidence interval). | | | | |
| --- | --- | --- | --- | --- |
| Geon | bootstrapped mean | 95% C.I. lower | 95% C.I. upper | jackknifed mean |
| 29 | 1.4 | 1.5 | 1.2 | 1.4 |
| 28 | no data | | | |
| 27 | -0.3 | -0.6 | -0.1 | -0.3 |
| 26 | -0.3 | -0.6 | 0.0 | -0.3 |
| 25 | -0.5 | -0.6 | -0.4 | -0.5 |
| 24 | 0.2 | -0.2 | 0.6 | 0.0 |
| 23 | 4.0 | 3.5 | 4.6 | 4.0 |
| 22 | 4.7 | 4.4 | 5.1 | 4.7 |
| 21 | 4.8 | 4.4 | 5.1 | 4.8 |
| 20 | 2.0 | 1.8 | 2.2 | 2.0 |
| 19 | 0.0 | -0.1 | 0.1 | 0.0 |
| 18 | 0.5 | 0.4 | 0.6 | 0.5 |
| 17 | 1.4 | 0.7 | 2.2 | 1.4 |
| 16 | -0.7 | -0.8 | -0.7 | -0.7 |
| 15 | -0.3 | -0.3 | -0.2 | -0.3 |
| 14 | -0.4 | -0.5 | -0.3 | -0.4 |
| 13 | -0.3 | -0.5 | -0.0 | -0.3 |
| 12 | 2.2 | 2.0 | 2.3 | 2.2 |
| 11 | 0.3 | 0.1 | 0.4 | 0.3 |
| 10 | 1.4 | 1.2 | 1.6 | 1.4 |
|  | | | | |
| Summary means of d13Ccarb (‰ V-PDB) data for grouped Geons | | | | |
| pre-LJE Geons 29-24 | -0.1 | -0.2 | 0.0 | -0.1 |
| LJE Geons 23-20 | 4.0 | 3.9 | 4.1 | 4.0 |
| post-LJE Geons 19-10 | 0.0 | 0.1 | 0.0 | 0.0 |

Table S4. Summary means for d13Ccarb values (‰ V-PDB) calculated for individual Geons spanning 3.0–1.0 Ga. d13Ccarb data can be found in Table S5 and Worksheets 1 and in Data S1. LJE-bearing intervals highlighted in light red. Geons are 100 Myr.

| Table S5. C-O isotope data for upper Tulomozero and lower Zaonega Fms, Onega Basin, Russia. | | | | | | | |
| --- | --- | --- | --- | --- | --- | --- | --- |
| OPH core depth (m) | δ13Ccarb ‰ (V-PDB) | δ18O ‰ (V-PDB) | |  | Tulomozero Fm outcrop | δ13Ccarb ‰ (V-PDB) | δ18O ‰ (V-PDB) |
| 1888.7 | -3.7 | -9.8 |  | | RG01(base sect.) | 10.6 | -9.3 |
| 1888.8 | -0.4 | -7.2 |  | | RG02 | 9.8 | -6.6 |
| 1888.88 | 0.3 | -7.6 |  | | RG03 | 9.5 | -9.6 |
| 1888.9 | 0.3 | -7.6 |  | | RG04 | 9.9 | -10.0 |
| 1888.9 | -0.6 | -8.0 |  | | RG05 | 9.7 | -8.6 |
| 1889.2 | -0.4 | -11.8 |  | | RG06 | 9.6 | -7.7 |
| 1902.7 | 1.6 | -11.3 |  | | RG07 | 8.2 | -9.0 |
| 1902.8 | 0.7 | -11.7 |  | | RG08 | 8.5 | -7.1 |
| 1903.0 | 1.3 | -12.5 |  | | RG09 | 7.8 | -10.5 |
| 1903.2 | 1.1 | -12.1 |  | | RG10 | 8.7 | -8.0 |
| 1903.3 | 2.3 | -11.6 |  | | RG11 | 10.3 | -8.1 |
| 1903.9 | 1.7 | -13.2 |  | | RG12 | 11.0 | -8.7 |
| 1904.0 | 1.5 | -13.8 |  | | RG13 | 8.1 | -8.7 |
| 1904.16 | 1.8 | -12.4 |  | | RG14 | 8.4 | -9.3 |
| 1904.2 | 1.9 | -12.4 |  | | RG16 | 6.9 | -10.5 |
| 1904.2 | 1.8 | -12.4 |  | | RG16B | 6.7 | -11.5 |
| 1905.3 | 2.0 | -12.7 |  | | RG17 (top sect.) | 7.6 | -10.1 |
| 1905.7 | 2.2 | -14.0 |  | |  |  |  |
| 1905.7 | 2.0 | -12.8 |  | | SN01 (base sect.) | 8.4 | -11.7 |
| 1915.1 | 4.3 | -12.9 |  | | SN02 | 8.7 | -8.1 |
| 1915.6 | 4.2 | -13.2 |  | | SN03 | 9.7 | -12.4 |
| 1915.8 | 5.2 | -11.8 |  | | SN04 | 9.6 | -11.6 |
| 1926.0 | 5.0 | -13.7 |  | | SN05 | 9.4 | -11.6 |
| 1926.2 | 4.7 | -13.6 |  | | SN06 | 8.9 | -11.5 |
| 1926.23 | 4.7 | -13.6 |  | | SN07 | 8.9 | -10.3 |
| 1926.5 | 5.1 | -12.8 |  | | SN09 | 8.1 | -9.4 |
| 1926.9 | 4.5 | -13.1 |  | | SN10 | 7.0 | -5.9 |
| 1926.93 | 4.5 | -13.1 |  | | SN11 | 9.1 | -10.0 |
| 1927.4 | 4.9 | -13.7 |  | | SN12 | 8.8 | -7.7 |
| 1927.8 | 5.0 | -12.5 |  | | SN13 | 8.9 | -5.1 |
| 1935.6 | 5.2 | -11.0 |  | | SN14 | 7.7 | -5.2 |
| 1946.2 | 4.8 | -12.7 |  | | SN15 | 8.1 | -7.0 |
| 1946.2 | 4.8 | -12.7 |  | | SN16 | 8.6 | -8.4 |
| 1946.6 | 4.5 | -13.9 |  | | SN17 | 8.5 | -9.2 |
| 1946.9 | 4.5 | -13.5 |  | | SN18 | 7.5 | -5.3 |
| 1947.3 | 3.2 | -14.8 |  | | SN19 | 8.9 | -9.0 |
| 1947.7 | 4.1 | -14.5 |  | | SN20 | 8.9 | -9.9 |
| 1957.2 | 4.3 | -13.5 |  | | SN21 | 9.0 | -11.2 |
| 1958.1 | 5.1 | -10.8 |  | | SN22 | 8.3 | -5.8 |
| 1958.8 | 4.2 | -13.1 |  | | SN23 | 7.5 | -5.1 |
| 1958.09 | 5.1 | -10.8 |  | | SN24 | 8.5 | -8.1 |
| 1969.9 | 3.5 | -14.4 |  | | SN25 | 8.6 | -10.6 |
| 1970.4 | 5.4 | -12.9 |  | | SN26 | 9.7 | -12.9 |
| 1970.41 | 5.4 | -12.9 |  | | SN27 | 9.6 | -12.5 |
| 1972.0 | 5.8 | -12.3 |  | | SN28 | 9.0 | -13.3 |
| 1972.3 | 3.7 | -12.5 |  | | SN29 | 9.2 | -12.3 |
| 1972.31 | 3.7 | -12.5 |  | | SN30 (top sect.) | 8.6 | -12.3 |
| 1972.8 | 6.3 | -12.7 |  | |  |  |  |
| 1980.3 | 6.2 | -13.3 |  | |  |  |  |
| 1980.8 | 7.8 | -12.8 |  | |  |  |  |
| 1980.9 | 7.3 | -13.1 |  | |  |  |  |
| 1991.7 | 8.2 | -12.8 |  | |  |  |  |
| 1992.3 | 8.1 | -12.7 |  | |  |  |  |
| 1992.3 | 7.5 | -12.9 |  | |  |  |  |
| 1992.8 | 8.4 | -12.6 |  | |  |  |  |
| 1992.83 | 8.4 | -12.6 |  | |  |  |  |
| 2003.1 | 8.1 | -13.3 |  | |  |  |  |
| 2003.1 | 8.8 | -12.8 |  | |  |  |  |
| 2003.06 | 8.1 | -13.3 |  | |  |  |  |
| 2003.09 | 8.8 | -12.8 |  | |  |  |  |
| 2004.0 | 8.8 | -13.5 |  | |  |  |  |
| 2004.66 | 8.7 | -13.5 |  | |  |  |  |
| 2004.69 | 8.8 | -13.5 |  | |  |  |  |
| 2004.7 | 8.7 | -13.5 |  | |  |  |  |
| 2004.7 | 8.8 | -13.5 |  | |  |  |  |
| 2005.9 | 8.4 | -13.6 |  | |  |  |  |
| 2006.0 | 8.9 | -13.3 |  | |  |  |  |
| 2010.5 | 7.9 | -13.7 |  | |  |  |  |
| 2011.08 | 7.9 | -13.6 |  | |  |  |  |
| 2011.1 | 7.9 | -13.6 |  | |  |  |  |
| 2011.7 | 7.8 | -13.6 |  | |  |  |  |
| 2019.2 | 7.7 | -13.4 |  | |  |  |  |
| 2019.21 | 7.7 | -13.4 |  | |  |  |  |
| 2025.3 | 5.3 | -13.9 |  | |  |  |  |
| 2035.7 | 6.3 | -8.8 |  | |  |  |  |
| 2035.71 | 6.3 | -8.8 |  | |  |  |  |
| 2036.4 | 5.4 | -12.0 |  | |  |  |  |
| 2036.42 | 5.4 | -12.0 |  | |  |  |  |
| 2037.6 | 6.1 | -10.8 |  | |  |  |  |
| 2037.9 | 5.3 | -12.1 |  | |  |  |  |
| 2038.4 | 5.4 | -12.2 |  | |  |  |  |
| 2043.6 | 5.9 | -10.6 |  | |  |  |  |
| 2043.7 | 5.0 | -12.3 |  | |  |  |  |
| 2044.0 | 5.3 | -12.5 |  | |  |  |  |
| 2044.3 | 5.2 | -12.5 |  | |  |  |  |
| 2044.3 | 5.2 | -12.5 |  | |  |  |  |
| 2044.5 | 4.9 | -11.9 |  | |  |  |  |
| 2049.1 | 5.0 | -12.1 |  | |  |  |  |
| 2050.7 | 4.9 | -12.8 |  | |  |  |  |
| 2050.8 | 4.5 | -12.9 |  | |  |  |  |
| 2051.6 | 4.5 | -12.6 |  | |  |  |  |
| 2052.28 | 4.6 | -12.4 |  | |  |  |  |
| 2052.3 | 4.6 | -12.4 |  | |  |  |  |
| 2052.3 | 4.7 | -12.4 |  | |  |  |  |
| 2052.34 | 4.7 | -12.4 |  | |  |  |  |
| 2052.5 | 4.1 | -13.5 |  | |  |  |  |
| 2052.6 | 5.2 | -13.4 |  | |  |  |  |
| 2058.47 | 5.8 | -8.2 |  | |  |  |  |
| 2058.5 | 5.8 | -8.2 |  | |  |  |  |
| 2067.9 | 4.0 | -12.9 |  | |  |  |  |
| 2068.0 | 6.5 | -12.2 |  | |  |  |  |
| 2068.05 | 3.4 | -12.5 |  | |  |  |  |
| 2068.1 | 3.4 | -12.5 |  | |  |  |  |
| 2076.6 | 3.9 | -13.3 |  | |  |  |  |
| 2076.7 | 0.8 | -14.4 |  | |  |  |  |
| 2077.0 | 3.8 | -13.3 |  | |  |  |  |
| 2077.1 | 4.3 | -12.9 |  | |  |  |  |
| 2077.37 | 3.9 | -12.7 |  | |  |  |  |
| 2077.4 | 3.9 | -12.7 |  | |  |  |  |
| 2077.6 | 5.1 | -12.1 |  | |  |  |  |
| 2078 | 4.5 | -11.2 |  | |  |  |  |
| 2078.0 | 4.5 | -11.2 |  | |  |  |  |
| 2084.7 | 4.0 | -14.4 |  | |  |  |  |
| 2084.8 | 5.6 | -13.0 |  | |  |  |  |
| 2086.4 | 5.6 | -12.1 |  | |  |  |  |
| 2086.4 | 5.6 | -12.1 |  | |  |  |  |
| 2093.1 | 6.4 | -11.4 |  | |  |  |  |
| 2093.12 | 6.4 | -11.4 |  | |  |  |  |
| 2094.2 | 5.7 | -12.2 |  | |  |  |  |
| 2102.8 | 6.5 | -11.3 |  | |  |  |  |
| 2102.9 | 6.6 | -11.4 |  | |  |  |  |
| 2103.0 | 4.6 | -12.9 |  | |  |  |  |
| 2103.6 | 5.6 | -12.6 |  | |  |  |  |
| 2104.5 | 7.4 | -10.5 |  | |  |  |  |
| 2117.6 | 7.3 | -10.6 |  | |  |  |  |
| 2117.6 | 7.3 | -10.7 |  | |  |  |  |
| 2117.64 | 7.3 | -10.7 |  | |  |  |  |
| 2118.2 | 7.4 | -10.5 |  | |  |  |  |
| 2118.46 | 7.6 | -10.7 |  | |  |  |  |
| 2118.5 | 7.6 | -10.7 |  | |  |  |  |
| 2119.09 | 7.8 | -10.6 |  | |  |  |  |
| 2119.1 | 7.8 | -10.6 |  | |  |  |  |
| 2205.4 | 12.2 | -7.6 |  | |  |  |  |
| 2206.2 | 11.7 | -4.6 |  | |  |  |  |
| 2208.1 | 12.2 | -3.6 |  | |  |  |  |
| 2208.8 | 12.5 | -2.9 |  | |  |  |  |
| 2252.1 | 11.4 | -10.4 |  | |  |  |  |
| 2290.4 | 9.7 | -9.0 |  | |  |  |  |
| 2305.3 | 9.2 | -7.0 |  | |  |  |  |
| 2314.5 | 9.9 | -9.1 |  | |  |  |  |
| 2324.4 | 8.6 | -9.0 |  | |  |  |  |
| 2328.4 | 8.1 | -7.2 |  | |  |  |  |

Table S5. Carbonate C and O isotope data (N=188) from the LJE-bearing succession n the Onega Basin, NW Russia. Data are from samples of the Tulomozero Formation at Raiguba (RG: 62°22.107’N, 033° 47.129’E) and Shunga (SN: 62°36.697’N, 034° 49.457’E) and from the portion of the Onega Parametric Hole (OPH) drill core that recovers the upper part of the Tulomozero Formation and lower part of the overlying Zaonega Formation.

Data S1 (separate file)

Dataset for d13Ccarb values from 3.0–1.0 Ga and for Permian–Recent deposits. This file contains three worksheets. Worksheets 1 and 2 consist of published d13Ccarb data spanning from 3.0­–1.0 Ga compiled from Refs. 80 and 81 and from publications that postdate those workers’ compilations (as listed in Table S1). In compiling the updated dataset for 3.0–1.0 Ga, we excluded carbonate rocks associated with banded-iron formation and those from features of clear diagenetic origin (e.g. cements, concretions). Worksheet 3 contains published d13Ccarb values compiled for marine and evaporite settings of Permian-Triassic, Messinian and Recent settings; sources of these data are listed in Table S2.

**References**

1 Adams, A., Diamond, L. W. & Aschwanden, L. Dolomitization by hypersaline reflux into dense groundwaters as revealed by vertical trends in strontium and oxygen isotopes: Upper Muschelkalk, Switzerland. *Sedimentology* **66**, 362-390, doi:10.1111/sed.12530 (2019).

2 Bakakas Mayika, K. *et al.* The Paleoproterozoic Francevillian succession of Gabon and the Lomagundi-Jatuli event. *Geology*, doi:10.1130/g47651.1 (2020).

3 Bekker, A. & Eriksson, K. A. A Paleoproterozoic drowned carbonate platform on the southeastern margin of the Wyoming Craton: a record of the Kenorland breakup. *Precambrian Res* **120**, 327-364, doi:https://doi.org/10.1016/S0301-9268(02)00165-1 (2003).

4 Bekker, A., Karhu, J. A., Eriksson, K. A. & Kaufman, A. J. Chemostratigraphy of Paleoproterozoic carbonate successions of the Wyoming Craton: tectonic forcing of biogeochemical change? *Precambrian Res* **120**, 279-325, doi:https://doi.org/10.1016/S0301-9268(02)00164-X (2003).

5 Bekker, A. *et al.* Chemostratigraphy of the Paleoproterozoic Duitschland Formation, South Africa: Implications for Coupled Climate Change and Carbon Cycling. *American Journal of Science* **301**, 261-285, doi:10.2475/ajs.301.3.261 (2001).

6 Bekker, A., Krapež, B., Müller, S. G. & Karhu, J. A. A short-term, post-Lomagundi positive C isotope excursion at c. 2.03 Ga recorded by the Wooly Dolomite, Western Australia. *Journal of the Geological Society* **173**, 689-700, doi:10.1144/jgs2015-152 (2016).

7 Bellanca, A. & Neri, R. Evaporite carbonate cycles of the Messinian, Sicily; stable isotopes, mineralogy, textural features, and environmental implications. *Journal of Sedimentary Research* **56**, 614-621, doi:10.1306/212f89ea-2b24-11d7-8648000102c1865d (1986).

8 Bontognali, T. R. R. *et al.* Dolomite formation within microbial mats in the coastal sabkha of Abu Dhabi (United Arab Emirates). *Sedimentology* **57**, 824-844, doi:10.1111/j.1365-3091.2009.01121.x (2010).

9 Brasier, A. T., Fallick, A. E., Prave, A. R., Melezhik, V. A. & Lepland, A. Coastal sabkha dolomites and calcitised sulphates preserving the Lomagundi-Jatuli carbon isotope signal. *Precambrian Res* **189**, 193-211, doi:https://doi.org/10.1016/j.precamres.2011.05.011 (2011).

10 Buggisch, W., Blomeier, D. & Joachimski, M. M. Facies, diagenesis and carbon isotopes of the Early Permian Gipshuken Formation (Svalbard). *Z Dtsch Ges Geowiss* **163**, 309-321, doi:10.1127/1860-1804/2012/0163-0309 (2012).

11 Buick, I. S., Uken, R., Gibson, R. L. & Wallmach, T. High-δ13C Paleoproterozoic carbonates from the Transvaal Supergroup, South Africa. *Geology* **26**, 875-878, doi:10.1130/0091-7613 (1998).

12 Canfield, D. E. *et al.* Oxygen dynamics in the aftermath of the Great Oxidation of Earth’s atmosphere. *Proceedings of the National Academy of Sciences* **110**, 16736, doi:10.1073/pnas.1315570110 (2013).

13 Caruso, A., Pierre, C., Blanc-Valleron, M. M. & Rouchy, J. M. Carbonate deposition and diagenesis in evaporitic environments: The evaporative and sulphur-bearing limestones during the settlement of the Messinian Salinity Crisis in Sicily and Calabria. *Palaeogeography, Palaeoclimatology, Palaeoecology* **429**, 136-162, doi:https://doi.org/10.1016/j.palaeo.2015.03.035 (2015).

14 Clarkson, M. O. *et al.* A new high-resolution δ13C record for Early Triassic: Insights from Arabian Platform. *Gondwana Res* **24**, 233-242, doi:https://doi.org/10.1016/j.gr.2012.10.002 (2013).

15 Cramer, B. S., Toggweiler, J. R., Wright, J. D., Katz, M. E. & Miller, K. G. Ocean overturning since the Late Cretaceous: Inferences from a new benthic foraminiferal isotope compilation. *Paleoceanography* **24**, doi:10.1029/2008pa001683 (2009).

16 Dal Corso, J. *et al.* Carbon isotope records reveal synchronicity between carbon cycle perturbation and the “Carnian Pluvial Event” in the Tethys realm (Late Triassic). *Global and Planetary Change* **127**, 79-90, doi:https://doi.org/10.1016/j.gloplacha.2015.01.013 (2015).

17 El Tabakh, M., Grey, K., Pirajno, F. & Charlotte Schreiber, B. Pseudomorphs after evaporitic minerals interbedded with 2.2 Ga stromatolites of the Yerrida basin, Western Australia: Origin and significance. *Geology* **27**, 871-874, doi:10.1130/0091-7613(1999)027<0871:paemiw>2.3.co;2 (1999).

18 Eriksson, P. G., Altermann, W., Eberhardt, L., Arend-Heidbrinck, S. & Bumby, A. J. Palaeoproterozoic Epeiric Sea Palaeoenvironments: The Silverton Formation (Pretoria Group, Transvaal Supergroup), South Africa. *Precambrian Sedimentary Environments*, 351-367, doi:doi:10.1002/9781444304312.ch16 (2002).

19 Evans, N. P. *et al.* Coupled measurements of δ18O and δD of hydration water and salinity of fluid inclusions in gypsum from the Messinian Yesares Member, Sorbas Basin (SE Spain). *Earth Planet Sc Lett* **430**, 499-510, doi:https://doi.org/10.1016/j.epsl.2015.07.071 (2015).

20 Ferguson, J., Chambers, L. A., Donnelly, T. H. & Burne, R. V. Carbon and oxygen isotopic composition of a recent megapolygon-spelean limestone, =Fisheman Bay, South Australia. *Chemical Geology: Isotope Geoscience section* **72**, 63-76, doi:https://doi.org/10.1016/0168-9622(88)90037-1 (1988).

21 Frauenstein, F., Veizer, J., Beukes, N., Van Niekerk, H. S. & Coetzee, L. L. Transvaal Supergroup carbonates: Implications for Paleoproterozoic δ18O and δ13C records. *Precambrian Res* **175**, 149-160, doi:https://doi.org/10.1016/j.precamres.2009.09.005 (2009).

22 Geske, A. *et al.* Impact of diagenesis and low grade metamorphosis on isotope (δ26Mg, δ13C, δ18O and 87Sr/86Sr) and elemental (Ca, Mg, Mn, Fe, Sr) signatures of Triassic sabkha dolomites. *Chem Geol* **332-333**, 45-64, doi:https://doi.org/10.1016/j.chemgeo.2012.09.014 (2012).

23 Glacon, G. *et al.* in *Supplement to: Glacon, G et al. (1990): Planktonic foraminiferal events and stable isotope records in the Upper Miocene, Site 654. In: Kastens, KA; Mascle, J; et al. (eds.), Proceedings of the Ocean Drilling Program, Scientific Results, College Station, TX (Ocean Drilling Program), 107, 415-427, https://doi.org/10.2973/odp.proc.sr.107.157.1990* (PANGAEA, 1990).

24 Grey, K. & Thorne, A. M. Biostratigraphic significance of stromatolites in upward shallowing sequences of the early proterozoic duck creek dolomite, Western Australia. *Precambrian Res* **29**, 183-206, doi:https://doi.org/10.1016/0301-9268(85)90068-3 (1985).

25 Hodell, D. A., Benson, R. H., Kent, D. V., Boersma, A. & Rakic-El Bied, K. Magnetostratigraphic, biostratigraphic, and stable isotope stratigraphy of an Upper Miocene drill core from the Salé Briqueterie (northwestern Morocco): A high-resolution chronology for the Messinian stage. *Paleoceanography* **9**, 835-855, doi:10.1029/94pa01838 (1994).

26 Hodgskiss, M. S. W. *et al.* New insights on the Orosirian carbon cycle, early Cyanobacteria, and the assembly of Laurentia from the Paleoproterozoic Belcher Group. *Earth Planet Sc Lett* **520**, 141-152, doi:https://doi.org/10.1016/j.epsl.2019.05.023 (2019).

27 Hodgskiss, M. S. W., Lamothe, K. G., Halverson, G. P. & Sperling, E. A. Extending the record of the Lomagundi–Jatuli carbon isotope excursion in the Labrador Trough, Canada. *Canadian Journal of Earth Sciences* **57**, 1089-1102, doi:10.1139/cjes-2019-0198 (2020).

28 Houston, R. S. Proterozoic mineral deposits near plate margins of Archean Wyoming province, USA. *Precambrian Res* **58**, 85-97, doi:https://doi.org/10.1016/0301-9268(92)90114-4 (1992).

29 Holail, H. The isotopic composition and diagenetic history of pleistocene carbonates, North Qatar. *Carbonates and Evaporites* **14**, 41-55, doi:10.1007/bf03176147 (1999).

30 Houston, R. S., Karlstrom, K. E., Graff, P. J. & Flurkey, A. J. New stratigraphic subdivisions and redefinition of subdivisions of late Archean and early Proterozoic metasedimentary and metavolcanic rocks of the Sierra Madre and Medicine Bow Mountains, southern Wyoming. Report No. 1520, (1992).

31 Jackson, G. D. Geology, Belcher Islands, Nunavut. *Geol. Surv. Canada Open File* **4923**, 149 (2013).

32 Karhu, J. A. Paleoproterozoic evolution of the carbon isotope ratios of sedimentary carbonates in the Fennoscandian Shield. *Geological Survey of Finland Bulletin* **371**, 1-87 (1993).

33 Kerr, G. B. *et al.* The Palaeoproterozoic global carbon cycle: insights from the Loch Maree Group, NW Scotland. *Journal of the Geological Society* **173**, 170-176, doi:10.1144/jgs2014-042 (2016).

34 Khalaf, F. I., Abdullah, F. A. & Gharib, I. M. Petrography, diagenesis and isotope geochemistry of dolostones and dolocretes in the Eocene Dammam Formation, Kuwait, Arabian Gulf. *Carbonates and Evaporites* **33**, 87-105, doi:10.1007/s13146-016-0330-5 (2018).

35 Krapež, B., Müller, S. G. & Bekker, A. Stratigraphy of the Late Palaeoproterozoic (∼2.03Ga) Wooly Dolomite, Ashburton Province, Western Australia: A carbonate platform developed in a failed rift basin. *Precambrian Res* **271**, 1-19, doi:https://doi.org/10.1016/j.precamres.2015.09.022 (2015).

36 Krupenik, V. A., Akhmedov, A. M. & Sveshnikova, K. Y. in *Palaeoproterozoic Onega Structure Geology, Tectonics, Deep Structure and Mineralogeny* (eds Glushanin L.V., Sharov N.V., & Shchiptsov V.V.) 250-255 (Karelian Research Centre, Russian Academy of Sciences, 2011).

37 Lindsay, J. F. & Brasier, M. D. Did global tectonics drive early biosphere evolution? Carbon isotope record from 2.6 to 1.9 Ga carbonates of Western Australian basins. *Precambrian Res* **114**, 1-34, doi:https://doi.org/10.1016/S0301-9268(01)00219-4 (2002).

38 Magaritz, M., Anderson, R. Y., Holser, W. T., Saltzman, E. S. & Garber, J. Isotope shifts in the Late Permian of the Delaware Basin, Texas, precisely timed by varved sediments. *Earth Planet Sc Lett* **66**, 111-124, doi:https://doi.org/10.1016/0012-821X(83)90130-9 (1983).

39 Maheshwari, A. *et al.* Global nature of the Paleoproterozoic Lomagundi carbon isotope excursion: A review of occurrences in Brazil, India, and Uruguay. *Precambrian Res* **182**, 274-299, doi:https://doi.org/10.1016/j.precamres.2010.06.017 (2010).

40 Martindale, R. C. *et al.* Sedimentology, chemostratigraphy, and stromatolites of lower Paleoproterozoic carbonates, Turee Creek Group, Western Australia. *Precambrian Res* **266**, 194-211, doi:https://doi.org/10.1016/j.precamres.2015.05.021 (2015).

41 Master, S., Bekker, A. & Hofmann, A. A review of the stratigraphy and geological setting of the Palaeoproterozoic Magondi Supergroup, Zimbabwe – Type locality for the Lomagundi carbon isotope excursion. *Precambrian Res* **182**, 254-273, doi:https://doi.org/10.1016/j.precamres.2010.08.013 (2010).

42 McDonald, B. & Partin, C. A. Is the Lomagundi Event present on the Rae craton? A case study from the Murmac Bay Group. *Canadian Journal of Earth Sciences* **53**, 457-465, doi:10.1139/cjes-2015-0186 (2016).

43 Reghizzi, M. *et al.* Isotope stratigraphy (87Sr/86Sr, δ18O, δ13C) of the Sorbas basin (Betic Cordillera, Spain): Paleoceanographic evolution across the onset of the Messinian salinity crisis. *Palaeogeography, Palaeoclimatology, Palaeoecology* **469**, 60-73, doi:https://doi.org/10.1016/j.palaeo.2016.12.039 (2017).

44 McKenzie, J. A. Holocene Dolomitization of Calcium Carbonate Sediments from the Coastal Sabkhas of Abu Dhabi, U.A.E.: A stable Isotope Study. *The Journal of Geology* **89**, 185-198 (1981).

45 Melezhik, V. A. & Fallick, A. E. A widespread positive δ13Ccarb anomaly at around 2.33–2.06 Ga on the Fennoscandian Shield: a paradox? *Terra Nova* **8**, 141-157, doi:10.1111/j.1365-3121.1996.tb00738.x (1996).

46 Melezhik, V. A. & Fallick, A. E. On the Lomagundi-Jatuli carbon isotopic event: The evidence from the Kalix Greenstone Belt, Sweden. *Precambrian Res* **179**, 165-190, doi:https://doi.org/10.1016/j.precamres.2010.03.002 (2010).

47 Melezhik, V. A., Fallick, A. E., Brasier, A. T. & Lepland, A. Carbonate deposition in the Palaeoproterozoic Onega basin from Fennoscandia: a spotlight on the transition from the Lomagundi-Jatuli to Shunga events. *Earth-Science Reviews* **147**, 65-98, doi:https://doi.org/10.1016/j.earscirev.2015.05.005 (2015).

48 Melezhik, V. A., Fallick, A. E. & Clark, T. Two billion year old isotopically heavy carbon: evidence from the Labrador Trough, Canada. *Canadian Journal of Earth Sciences* **34**, 271-285, doi:10.1139/e17-025 (1997).

49 Melezhik, V. A., Fallick, A. E., Filippov, M. M. & Larsen, O. Karelian shungite—an indication of 2.0-Ga-old metamorphosed oil-shale and generation of petroleum: geology, lithology and geochemistry. *Earth-Science Reviews* **47**, 1-40, doi:https://doi.org/10.1016/S0012-8252(99)00027-6 (1999).

50 Melezhik, V. A., Fallick, A. E. & Kuznetsov, A. B. Palaeoproterozoic, rift-related, 13C-rich, lacustrine carbonates, NW Russia. Part II: Global isotope signal recorded in the lacustrine dolostones. *Earth and Environmental Science Transactions of the Royal Society of Edinburgh* **95**, 423-444, doi:Doi: 10.1017/s0263593300001152 (2004).

51 Melezhik, V. A., Fallick, A. E., Medvedev, P. V. & Makarikhin, V. V. Extreme 13Ccarb enrichment in ca. 2.0 Ga magnesite–stromatolite–dolomite–`red beds' association in a global context: a case for the world-wide signal enhanced by a local environment. *Earth-Science Reviews* **48**, 71-120, doi:https://doi.org/10.1016/S0012-8252(99)00044-6 (1999).

52 Melezhik, V. A. *et al.* in *Reading the Archive of Earth’s Oxygenation: Volume 2: The Core Archive of the Fennoscandian Arctic Russia - Drilling Early Earth Project* (eds Victor Melezhik *et al.*) 505-590 (Springer Berlin Heidelberg, 2013).

53 Melezhik, V. A. *et al.* in *Reading the Archive of Earth’s Oxygenation: Volume 2: The Core Archive of the Fennoscandian Arctic Russia - Drilling Early Earth Project* (eds Victor Melezhik *et al.*) 769-1046 (Springer Berlin Heidelberg, 2013).

54 Melezhik, V. *et al.* *Reading the Archive of Earth’s Oxygenation, Volume 2: The Core Archive of the Fennoscandian Arctic Russia - Drilling Early Earth Project*. (Springer, 2013).

55 Montana, G., Censi, P. & Bellia, S. Stable isotope geochemistry and mineralogy of Messinian evaporitic carbonate outcrops in north eastern Sicily. *Geologica Carpathica* **45**, 3-9 (1993).

56 Oliveri, E., Neri, R., Bellanca, A. & Riding, R. Carbonate stromatolites from a Messinian hypersaline setting in the Caltanissetta Basin, Sicily: petrographic evidence of microbial activity and related stable isotope and rare earth element signatures. *Sedimentology* **57**, 142-161, doi:10.1111/j.1365-3091.2009.01094.x (2010).

57 Ossa Ossa, F. *et al.* Two-step deoxygenation at the end of the Paleoproterozoic Lomagundi Event. *Earth Planet Sc Lett* **486**, 70-83, doi:https://doi.org/10.1016/j.epsl.2018.01.009 (2018).

58 Papineau, D. *et al.* Nanoscale petrographic and geochemical insights on the origin of the Palaeoproterozoic stromatolitic phosphorites from Aravalli Supergroup, India. *Geobiology* **14**, 3-32, doi:10.1111/gbi.12164 (2016).

59 Paul, A. & Lokier, S. W. Holocene marine hardground formation in the Arabian Gulf: Shoreline stabilisation, sea level and early diagenesis in the coastal sabkha of Abu Dhabi. *Sedimentary Geology* **352**, 1-13, doi:https://doi.org/10.1016/j.sedgeo.2017.02.005 (2017).

60 Peryt, T. M., Durakiewicz, T., Kotarba, M. J., Oszczepalski, S. & Peryt, D. Carbon isotope stratigraphy of the basal Zechstein (Lopingian) strata in Northern Poland and its global correlation. *Geological Quarterly* **56**, 285-298 (2012).

61 Peryt, T. M., Hałas, S. & Peryt, D. Carbon and oxygen isotopic composition and foraminifers of condensed basal Zechstein (Upper Permian) strata in western Poland: environmental and stratigraphic implications. *Geological Journal* **50**, 446-464, doi:10.1002/gj.2549 (2015).

62 Pierre, C. & Rouchy, J. M. in *Supplement to: Pierre, C; Rouchy, JM (1990): Sedimentary and diagenetic evolution of Messinian evaporites in the Tyrrhenian Sea (ODP Leg 107, Sites 652, 653, and 654): petrographic, mineralogical, and stable isotope records. In: Kastens, KA; Mascle, J; et al. (eds.), Proceedings of the Ocean Drilling Program, Scientific Results, College Station, TX (Ocean Drilling Program), 107, 187-210, https://doi.org/10.2973/odp.proc.sr.107.131.1990* (PANGAEA, 1990).

63 Préat, A. *et al.* Paleoproterozoic high δ13C dolomites from the Lastoursville and Franceville basins (SE Gabon): Stratigraphic and synsedimentary subsidence implications. *Precambrian Res* **189**, 212-228, doi:https://doi.org/10.1016/j.precamres.2011.05.013 (2011).

64 Preto, N. *et al.* Primary dolomite in the Late Triassic Travenanzes Formation, Dolomites, Northern Italy: Facies control and possible bacterial influence. *Sedimentology* **62**, 697-716, doi:10.1111/sed.12157 (2015).

65 Purohit, R., Sanyal, P., Roy, A. B. & Bhattacharya, S. K. 13C enrichment in the Palaeoproterozoic carbonate rocks of Aravalli Supergroup, northwest India: Influence of depositional environment. *Gondwana Research* **18**, 538-546, doi:https://doi.org/10.1016/j.gr.2010.01.001 (2010).

66 Rieder, M. *et al.* Precipitation of dolomite from seawater on a Carnian coastal plain (Dolomites, northern Italy): evidence from carbonate petrography and Sr isotopes. *Solid Earth* **10**, 1243-1267, doi:10.5194/se-10-1243-2019 (2019).

67 Salminen, P. E., Karhu, J. A. & Melezhik, V. A. Tracking lateral δ13Ccarb variation in the Paleoproterozoic Pechenga Greenstone Belt, the north eastern Fennoscandian Shield. *Precambrian Res* **228**, 177-193, doi:https://doi.org/10.1016/j.precamres.2013.01.005 (2013).

68 Salminen, P. E., Karhu, J. A. & Melezhik, V. A. Kolosjoki Sedimentary Formation: A record in the aftermath of the Paleoproterozoic global positive δ13C excursion in sedimentary carbonates. *Chem Geol* **362**, 165-180, doi:https://doi.org/10.1016/j.chemgeo.2013.10.018 (2013).

69 Melezhik, V. A. *et al.* in *Reading the Archive of Earth’s Oxygenation: Volume 2: The Core Archive of the Fennoscandian Arctic Russia - Drilling Early Earth Project* (eds Victor Melezhik *et al.*) 591-768 (Springer Berlin Heidelberg, 2013).

70 Schröder, S., Bekker, A., Beukes, N. J., Strauss, H. & Van Niekerk, H. S. Rise in seawater sulphate concentration associated with the Paleoproterozoic positive carbon isotope excursion: evidence from sulphate evaporites in the ∼2.2–2.1 Gyr shallow-marine Lucknow Formation, South Africa. *Terra Nova* **20**, 108-117, doi:10.1111/j.1365-3121.2008.00795.x (2008).

71 She, Z. *et al.* The termination and aftermath of the Lomagundi-Jatuli carbon isotope excursions in the Paleoproterozoic Hutuo Group, North China. *Journal of Earth Science* **27**, 297-316, doi:10.1007/s12583-015-0654-4 (2016).

72 Scholze, F. *et al.* A multistratigraphic approach to pinpoint the Permian-Triassic boundary in continental deposits: The Zechstein–Lower Buntsandstein transition in Germany. *Global and Planetary Change* **152**, 129-151, doi:https://doi.org/10.1016/j.gloplacha.2017.03.004 (2017).

73 Stiller, M., Rounick, J. S. & Shasha, S. Extreme carbon-isotope enrichments in evaporating brines. *Nature* **316**, 434-435, doi:10.1038/316434a0 (1985).

74 Sungatullin, R. K., Kuleshov, V. N. & Kadyrov, R. I. Isotope (δ13C and δ18O) compositions of dolomites from the Permian evaporitic sequences of the Eastern Russian Plate: Evidence from the Syukeevo gypsum deposit. *Lithology and Mineral Resources* **49**, 406-415, doi:10.1134/s0024490214050071 (2014).

75 Tang, H., Chen, Y., Wu, G. & Lai, Y. Paleoproterozoic positive δ13Ccarb excursion in the northeastern Sino-Korean craton: Evidence of the Lomagundi Event. *Gondwana Research* **19**, 471-481, doi:https://doi.org/10.1016/j.gr.2010.07.002 (2011).

76 Todaro, S., Rigo, M., Randazzo, V. & Di Stefano, P. The end-Triassic mass extinction: A new correlation between extinction events and δ13C fluctuations from a Triassic-Jurassic peritidal succession in western Sicily. *Sedimentary Geology* **368**, 105-113, doi:https://doi.org/10.1016/j.sedgeo.2018.03.008 (2018).

77 van der Laan, E. *et al.* Astronomical forcing of Northwest African climate and glacial history during the late Messinian (6.5–5.5Ma). *Palaeogeography, Palaeoclimatology, Palaeoecology* **313-314**, 107-126, doi:https://doi.org/10.1016/j.palaeo.2011.10.013 (2012).

78 Wanke, A. & Melezhik, V. Sedimentary and volcanic facies recording the Neoarchaean continent breakup and decline of the positive δ13Ccarb excursion. *Precambrian Res* **140**, 1-35, doi:https://doi.org/10.1016/j.precamres.2005.05.003 (2005).

79 Wilson, J. P. *et al.* Geobiology of late Paleoproterozoic Duck Creek Formation, Western Australia. *Precambrian Res* **179**, 135-149, doi:https://doi.org/10.1016/j.precamres.2010.02.019 (2010).

80 Shields, G. & Veizer, J. Precambrian marine carbonate isotope database: Version 1.1. *Geochemistry, Geophysics, Geosystems* **3**, 1 of 12-12 of 12, doi:10.1029/2001gc000266 (2002).

81 Prokoph, A., Shields, G. A. & Veizer, J. Compilation and time-series analysis of a marine carbonate δ18O, δ13C, 87Sr/86Sr and δ34S database through Earth history. *Earth-Science Reviews* **87**, 113-133, doi:https://doi.org/10.1016/j.earscirev.2007.12.003 (2008).
